# Supplementary material for: An estrogen-regulated long non-coding RNA NCALD promotes luminal breast cancer proliferation by activating GRHL2
Source: Springer Nature journal article supplement (doi:10.1186/s12935-024-03245-0), 2024-01-30

Table S1. The primary antibodies

| Name       | Lot       | Corporation |
|------------|-----------|-------------|
| ERa        | sc-8002X  | Santa Cruz  |
| p16        | 92803S    | CST         |
| p21        | 2947S     | CST         |
| E-cadherin | ab133597  | Abcam       |
| N-cadherin | 13116     | CST         |
| Cyclin E2  | 4132      | CST         |
| Cyclin D1  | bs-20596R | Bioss       |
| Snail      | 3879      | CST         |
| GRHL2      | A10153    | Abclonal    |

Table S2. The siRNA and shRNA sequences

| Product name                      | Target sequence      |
|-----------------------------------|----------------------|
| SE-lncRNA NCALD Smart<br>Silencer | ACAGTTGGGCTTGAAACCAT |
|                                   | GCCCTGTCATTGGGAATAAG |
|                                   | GGACTAATAATGCTGACCTC |
|                                   | GAGAGATGCAAGATTGAAA  |
|                                   | ACCGAAGATGGAAGTAAA   |
|                                   | GCAAGAGAATTGAGTAAGA  |
| ESR1 siRNA                        | TGATCAAACGCTCTAAGAA  |
|                                   | TCCGAGTATGATCCTACCA  |
|                                   | TACTGTTTGCTCCTAACTT  |
| SE-lncRNA NCALD shRNA             | ACCGAAGATGGAAGTAAA   |
| ESR1 shRNA                        | TACTGTTTGCTCCTAACTT  |

Table S3. The primers of RT-qPCR

|                 |                                    |
|-----------------|------------------------------------|
| ESR1            | F:5-CGTCGATTATCTGAATTTGGCCT-3      |
|                 | R:5-CCCACTCAACAGCGTGTCTC-3         |
| GRHL2           | F:5-TCAATACCCGAAGAGCCTACA-3        |
|                 | R:5-CTTGGCTGTCACTTGCTTTGC-3        |
| SE-lncRNA NCALD | <b>F:5-CGAAGATGGAAGTCAAATGCC-3</b> |
|                 | R:5-CTGGATGAGGCTCCCTGAAG-3         |
| GAPDH           | F:5-GAACGGGAAGCTCACTGG-3           |
|                 | R:5-GCCTGCTTCACCACCTTCT-3          |
| c-MYC           | F:5-GGCTCCTGGCAAAGGTCA-3           |
|                 | R:5-CTGCGTAGTTGTGCTGATGT-3         |

Table S4. Raw data of microarray (showed in Supplemental Videos and Spreadsheets)

Table.S5 Relevance analysis of lncRNA NCALD expression in patients with breast cancer (n = 134)

| Characteristics       | Total | SE-lncRNA NCALD |      | <i>P</i> |
|-----------------------|-------|-----------------|------|----------|
|                       |       | Low             | High |          |
| Age (Years)           |       |                 |      | 0.788    |
| >60                   | 41    | 27              | 14   |          |
| ≤60                   | 93    | 59              | 34   |          |
| Lymph node metastasis |       |                 |      | 0        |
| Negative              | 57    | 44              | 13   |          |
| Positive              | 77    | 42              | 35   |          |
| Tumour size (cm)      |       |                 |      | 0        |
| >2                    | 70    | 27              | 43   |          |
| ≤2                    | 64    | 59              | 5    |          |
| AJCC stage            |       |                 |      | 0.39     |
| III                   | 90    | 60              | 30   |          |
| IIIIV                 | 44    | 26              | 18   |          |
| Molecular subtype     |       |                 |      | 0        |
| Basal-like            | 29    | 27              | 2    |          |
| HER2                  | 16    | 14              | 2    |          |
| Luminal               | 89    | 45              | 44   |          |
| ER status             |       |                 |      | 0        |
| High                  | 47    | 3               | 44   |          |
| Low                   | 87    | 83              | 4    |          |
| PR status             |       |                 |      | 0.003    |
| High                  | 45    | 21              | 24   |          |
| Low                   | 89    | 65              | 24   |          |
| HER2 status           |       |                 |      | 0.807    |
| High                  | 38    | 25              | 13   |          |
| Low                   | 96    | 61              | 35   |          |

Table.S6 Prognostic factors of overall survival in patients with luminal breast cancer

by univariate analysis.

| Parameter                    | N  | Cumulative survival rates (%) |         | Mean survival time (Mo) | HR    | 95% CI      | P     |
|------------------------------|----|-------------------------------|---------|-------------------------|-------|-------------|-------|
|                              |    | 3 years                       | 5 years |                         |       |             |       |
| <b>Age</b>                   |    |                               |         |                         |       |             |       |
| ≤60                          | 59 | -                             | -       | 129.3                   |       |             |       |
| >60                          | 30 | -                             | 93.3    | 114.2                   | 6.354 | 1.681–24.02 | 0.006 |
| <b>lncRNA NCALD level</b>    |    |                               |         |                         |       |             |       |
| Low                          | 45 | -                             | -       | 130.2                   |       |             |       |
| High                         | 44 | -                             | 93.0    | 118.1                   | 5.346 | 1.15–24.77  | 0.032 |
| <b>Lymph node metastasis</b> |    |                               |         |                         |       |             |       |
| No                           | 48 | -                             | -       | 129.4                   |       |             |       |
| Yes                          | 41 | -                             | 92.7    | 119.2                   | 11.93 | 1.53–93.21  | 0.018 |
| <b>Tumour size</b>           |    |                               |         |                         |       |             |       |
| ≤2cm                         | 34 | -                             | -       | 129.5                   |       |             |       |
| >2cm                         | 55 | -                             | 94.5    | 120.8                   | 2.87  | 0.62–13.27  | 0.178 |
| <b>AJCC</b>                  |    |                               |         |                         |       |             |       |
| 1-2                          | 64 | -                             | 96.8    | 127.1                   |       |             |       |
| 3-4                          | 25 | -                             | 95.8    | 116.4                   | 3.35  | 1.02–10.97  | 0.046 |
| <b>ER status</b>             |    |                               |         |                         |       |             |       |
| Low                          | 42 | -                             | -       | 130.1                   |       |             |       |
| High                         | 47 | -                             | 93.3    | 118.5                   | 4.81  | 1.04–22.27  | 0.045 |
| <b>PR status</b>             |    |                               |         |                         |       |             |       |
| Low                          | 47 | -                             | 95.7    | 123.0                   |       |             |       |
| High                         | 42 | -                             | 97.6    | 125.3                   | 0.95  | 0.29–3.10   | 0.927 |
| <b>HER2 status</b>           |    |                               |         |                         |       |             |       |
| Low                          | 67 | -                             | 95.5    | 123.1                   |       |             |       |
| High                         | 22 | -                             | -       | 126.4                   | 0.70  | 0.15–3.24   | 0.648 |

Table S7 Multivariate analysis of overall survival in luminal breast cancer using the Cox proportional hazards model.

| Parameter             | N  | HR     | 95%CI       | <i>P</i> |
|-----------------------|----|--------|-------------|----------|
| Age                   |    |        |             |          |
| ≤60                   | 59 |        |             |          |
| >60                   | 30 | 7.59   | 1.62-35.65  | 0.01     |
| lncRNA NCALD level    |    |        |             |          |
| Low                   | 45 |        |             |          |
| High                  | 44 | 30.122 | 5.16-175.79 | <0.001   |
| Lymph node metastasis |    |        |             |          |
| No                    | 48 |        |             |          |
| Yes                   | 41 | 36.91  | 4.22-322.70 | 0.001    |
| AJCC                  |    |        |             |          |
| 1-2                   | 64 |        |             |          |
| 3-4                   | 25 |        |             | 0.167    |
| ER status             |    |        |             |          |
| Low                   | 42 |        |             |          |
| High                  | 47 |        |             | 0.837    |

Table.S8 Prognostic factors of disease-free survival in luminal breast cancer patients by univariate analysis.

| Parameter             | N  | Cumulative disease -free rates (%) |         | Mean disease-free time (mo) | HR    | 95% CI      | P      |
|-----------------------|----|------------------------------------|---------|-----------------------------|-------|-------------|--------|
|                       |    | 3 years                            | 5 years |                             |       |             |        |
|                       |    | Age                                |         |                             |       |             |        |
| ≤60                   | 59 | 96.6                               | -       | 118.2                       |       |             |        |
| >60                   | 30 | 96.7                               | 83.2    | 107.4                       | 1.741 | 0.76–3.98   | 0.189  |
| lncRNA NCALD level    |    |                                    |         |                             |       |             |        |
| Low                   | 45 | -                                  | -       | 127.8                       |       |             |        |
| High                  | 44 | -                                  | 81.8    | 101.3                       | 8.453 | 2.51–28.48  | 0.001  |
| Lymph node metastasis |    |                                    |         |                             |       |             |        |
| No                    | 48 | 93.7                               | -       | 116.1                       |       |             |        |
| Yes                   | 41 | -                                  | 87.8    | 112.7                       | 1.524 | 0.67–3.48   | 0.317  |
| Tumour size           |    |                                    |         |                             |       |             |        |
| ≤2cm                  | 34 | 97.1                               | -       | 129.5                       |       |             |        |
| >2cm                  | 55 | 96.4                               | 87.3    | 120.8                       | 3.14  | 1.07–9.23   | 0.038  |
| AJCC                  |    |                                    |         |                             |       |             |        |
| 1-2                   | 64 | -                                  | 98.4    | 122.5                       |       |             |        |
| 3-4                   | 25 | -                                  | 92.0    | 94.1                        | 5.19  | 2.24–12.19  | <0.001 |
| ER status             |    |                                    |         |                             |       |             |        |
| Low                   | 42 | -                                  | -       | 130.1                       |       |             |        |
| High                  | 47 | 93.6                               | 82.8    | 118.5                       | 7.48  | 12.22–25.20 | 0.001  |
| PR status             |    |                                    |         |                             |       |             |        |
| Low                   | 47 | -                                  | 91.4    | 117.6                       |       |             |        |
| High                  | 42 | 95.2                               | 85.6    | 110.8                       | 1.57  | 0.69–3.58   | 0.284  |
| HER2 status           |    |                                    |         |                             |       |             |        |
| Low                   | 67 | 97.0                               | 91.0    | 116.4                       |       |             |        |
| High                  | 22 | 95.5                               | -       | 107.7                       | 1.79  | 0.75–4.22   | 0.184  |



Table. S9 Multivariate analyses of disease-free survival in luminal breast cancer using the Cox proportional hazards model.

| Parameter             | N  | HR    | 95%CI        | P     |
|-----------------------|----|-------|--------------|-------|
| SE-lncRNA NCALD level |    |       |              |       |
| Low                   | 45 |       |              |       |
| High                  | 44 | 6.913 | 2.035–23.482 | 0.002 |
| Tumour size           |    |       |              |       |
| ≤2cm                  | 34 |       |              |       |
| >2cm                  | 55 |       |              | 0.917 |
| AJCC                  |    |       |              |       |
| 1-2                   | 64 |       |              |       |
| 3-4                   | 25 | 4.07  | 1.75–9.48    | 0.001 |
| ER status             |    |       |              |       |
| Low                   | 42 |       |              |       |
| High                  | 47 |       |              | 0.741 |

Table S10. The result of motif analysis of the promoter region using ChIPBase and haTFtarget TF

| Source | Sequence name | Star                             | Stop | Strand | Score   | P value  | Q value  | Matched Motif            |
|--------|---------------|----------------------------------|------|--------|---------|----------|----------|--------------------------|
| TCF4   | hTFtarget     | NC_000008.11:101492399-101494499 | 194  | 215 +  | 20.5526 | 7.69E-08 | 1.87E-05 | GGCGCGAGCGGGCGAGCGAGCG   |
| SP1    | hTFtarget     | NC_000008.11:101492399-101494499 | 1033 | 1054 - | 17.803  | 5.29E-07 | 0.000836 | CGGGGAGGGAGGCGGGGGAGG    |
| ESR1   | hTFtarget     | NC_000008.11:101492399-101494499 | 1028 | 1052 - | 17.4328 | 5.37E-07 | 0.00214  | GGGGAGGGAGGCGGGGGAGGGGGA |

**Figure S1.** Cytoplasmic/nuclear RNA fractionation of SE-lncRNA NCALD. MALAT1 and H19 were the positive control of genes located at nuclear and cytoplasmic regions. Three biological replicates were performed, and the data are representative of all experiments.

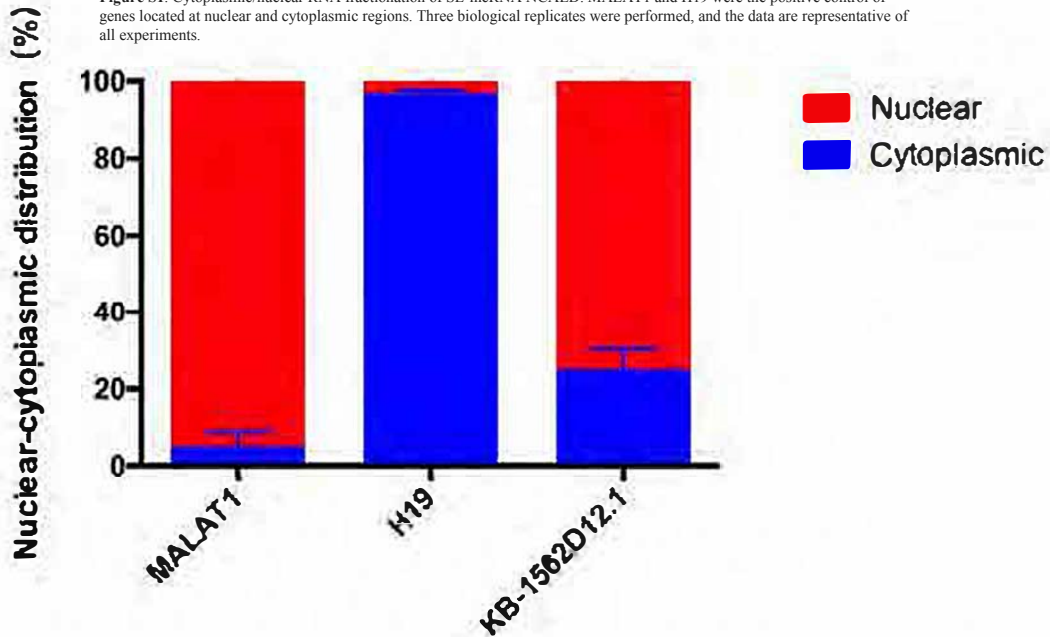

a

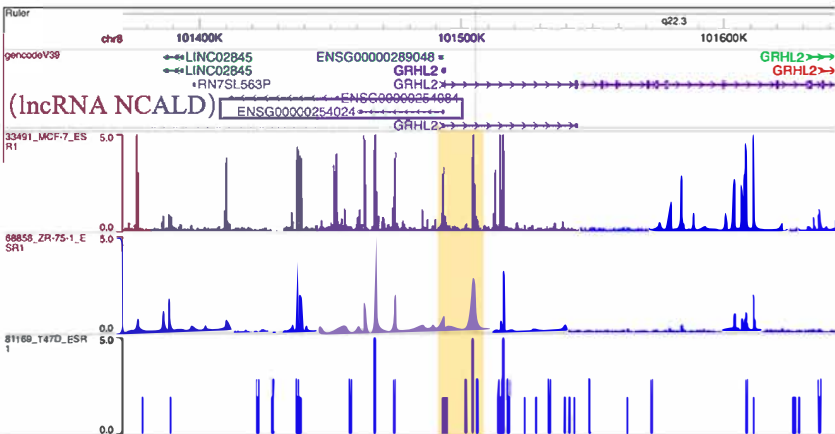

b

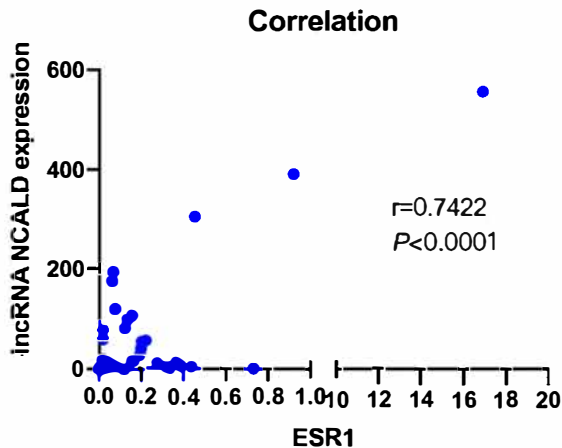

**Figure S2. a.** ChIP-seq data showed significant peaks of ER $\alpha$  near the TSS (Yellow rectangle represents significant peaks of ER $\alpha$ ). **b** RT-qPCR analysis of breast cancer tissues was conducted to analyze the expression patterns of ER $\alpha$  and lincRNA NCALD.

**a**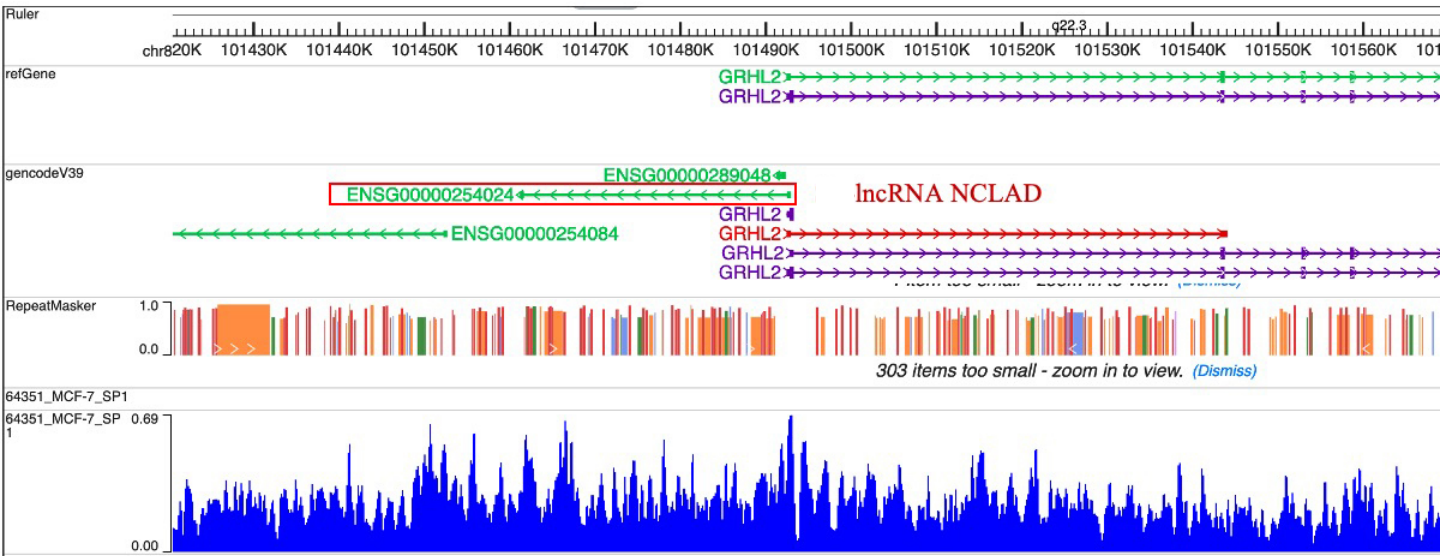**b**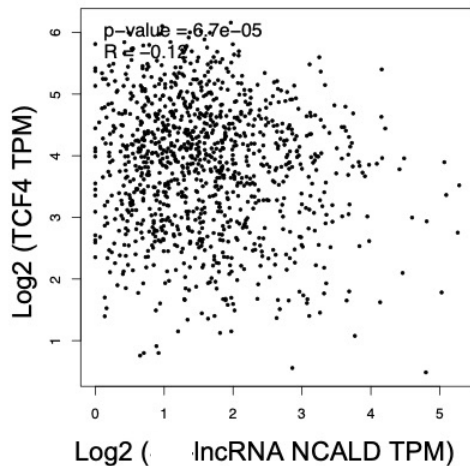

**Figure S3.** SP1 and TCF4 were not candidate transcription factors of lncRNA NCLAD. a. SP1 ChIP-seq data showed low signal ( $\text{rpm} < 0.69$ ) near TSS of lncRNA NCLAD in MCF7 cell. The y-axis represents reads per million (rpm) of ChIP-seq. b. The correlation between TCF4 and lncRNA NCLAD was negative in breast cancer ( $r = -0.12$ )

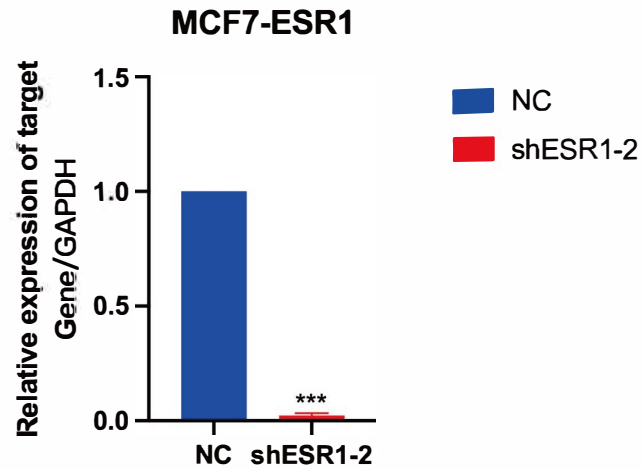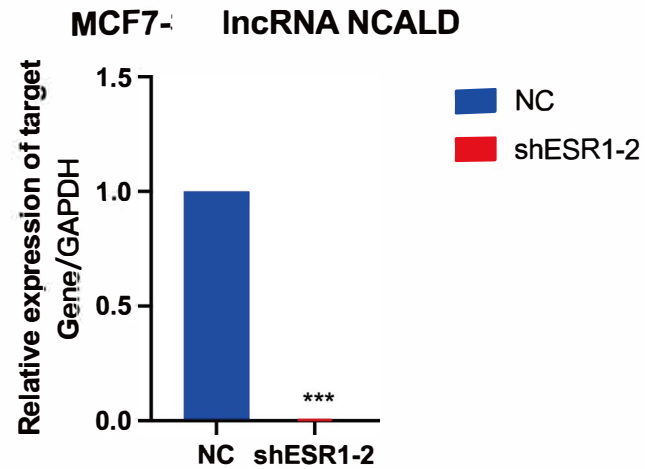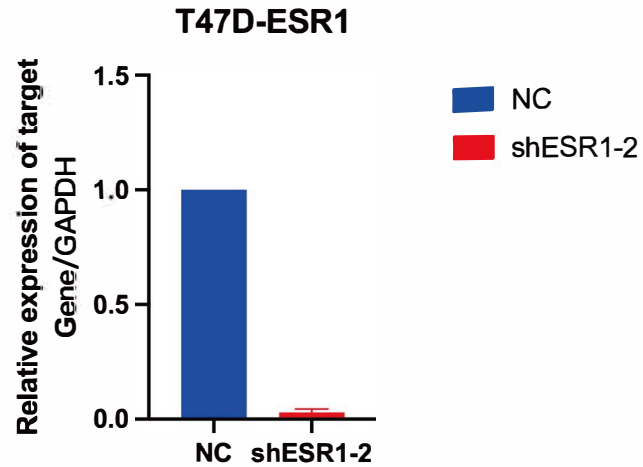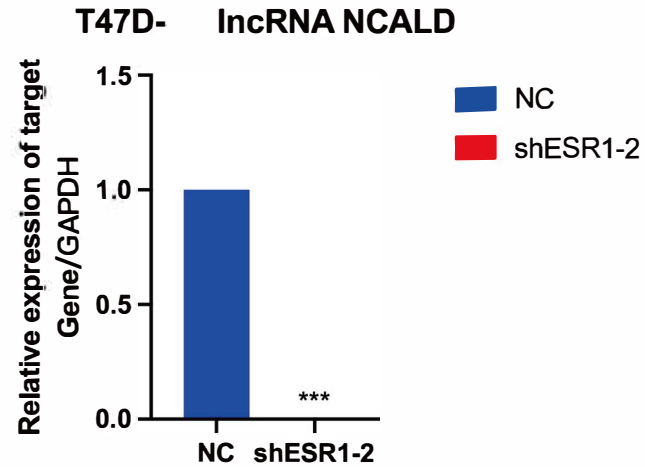

**Figure S4.** RT-qPCR assay showed that the expression levels of  $ER\alpha$  and lncRNA NCALD in normal control cells were lower than that in the shESR1-2 cells. All experiments were biologically replicated three times.

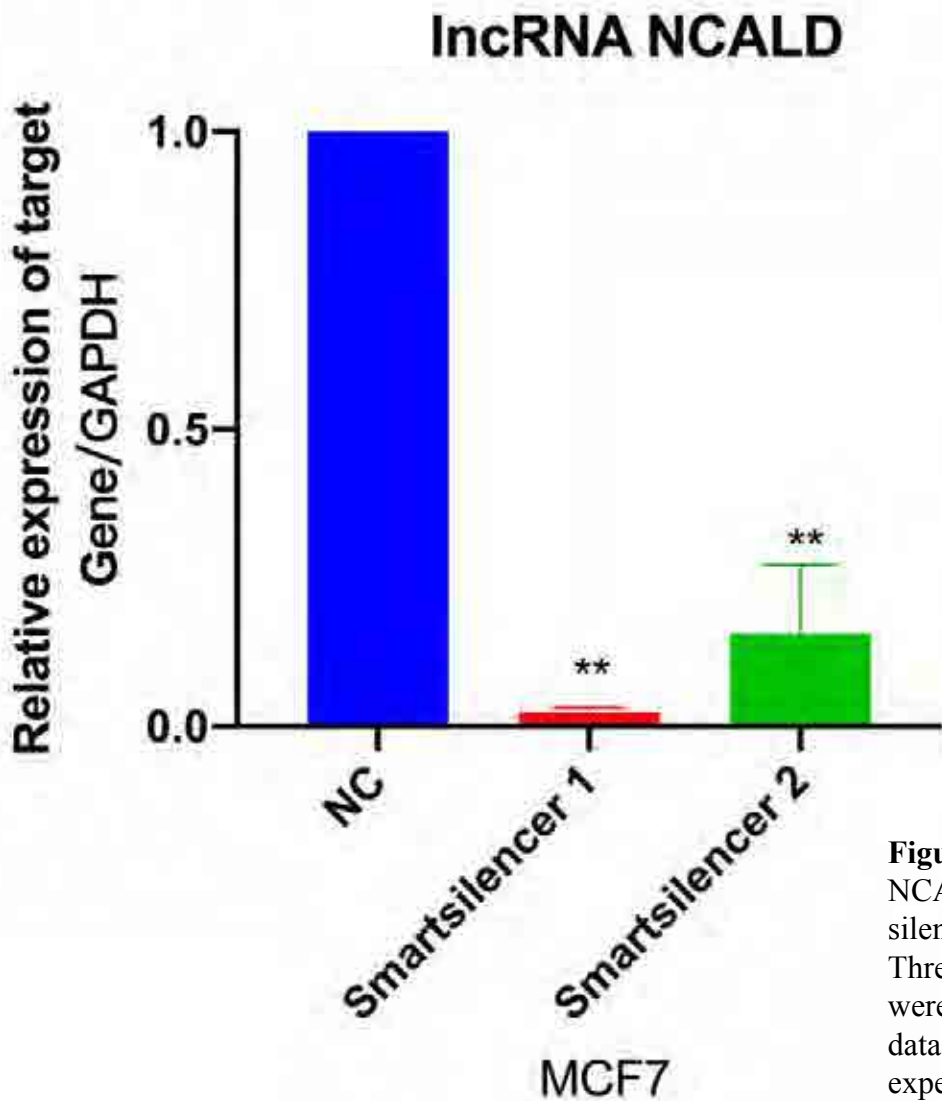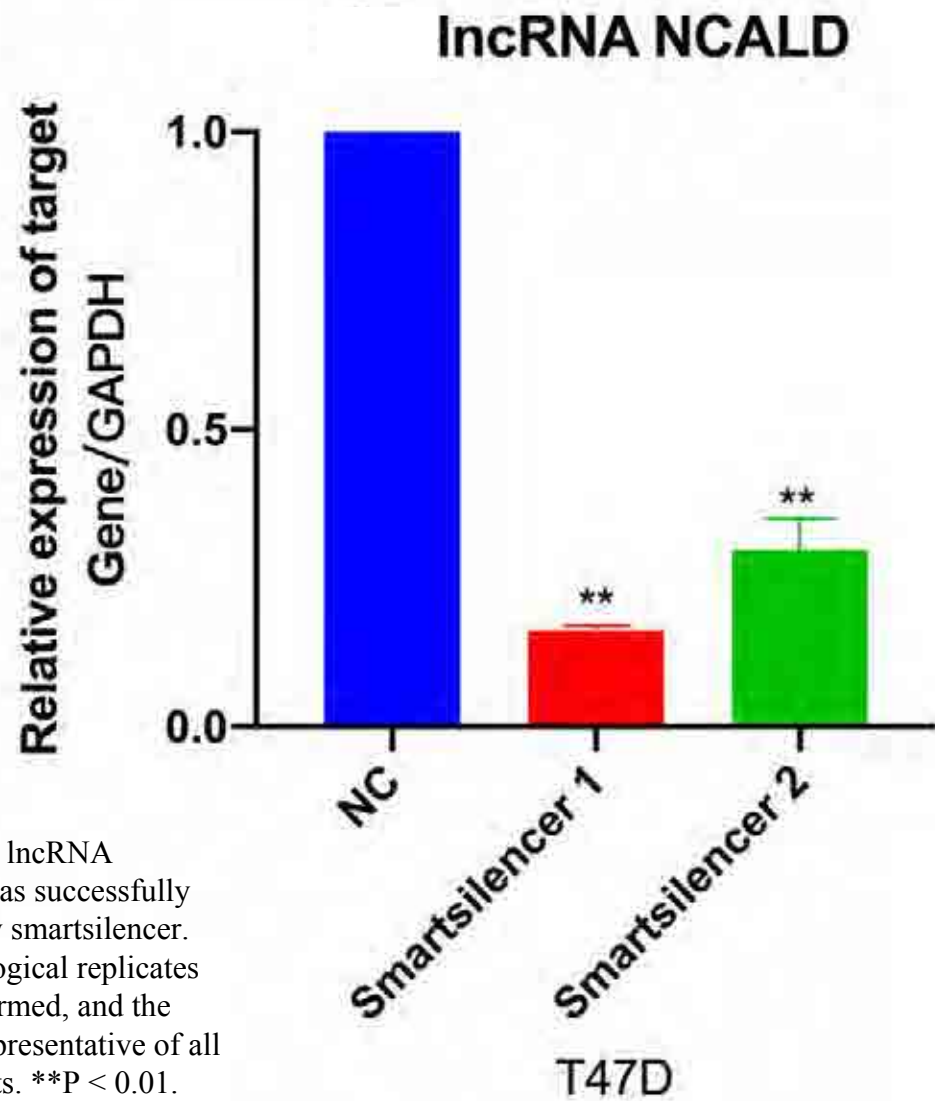

**Figure S5.** IncRNA NCALD was successfully silenced by smartsilencer. Three biological replicates were performed, and the data are representative of all experiments. \*\*P < 0.01.

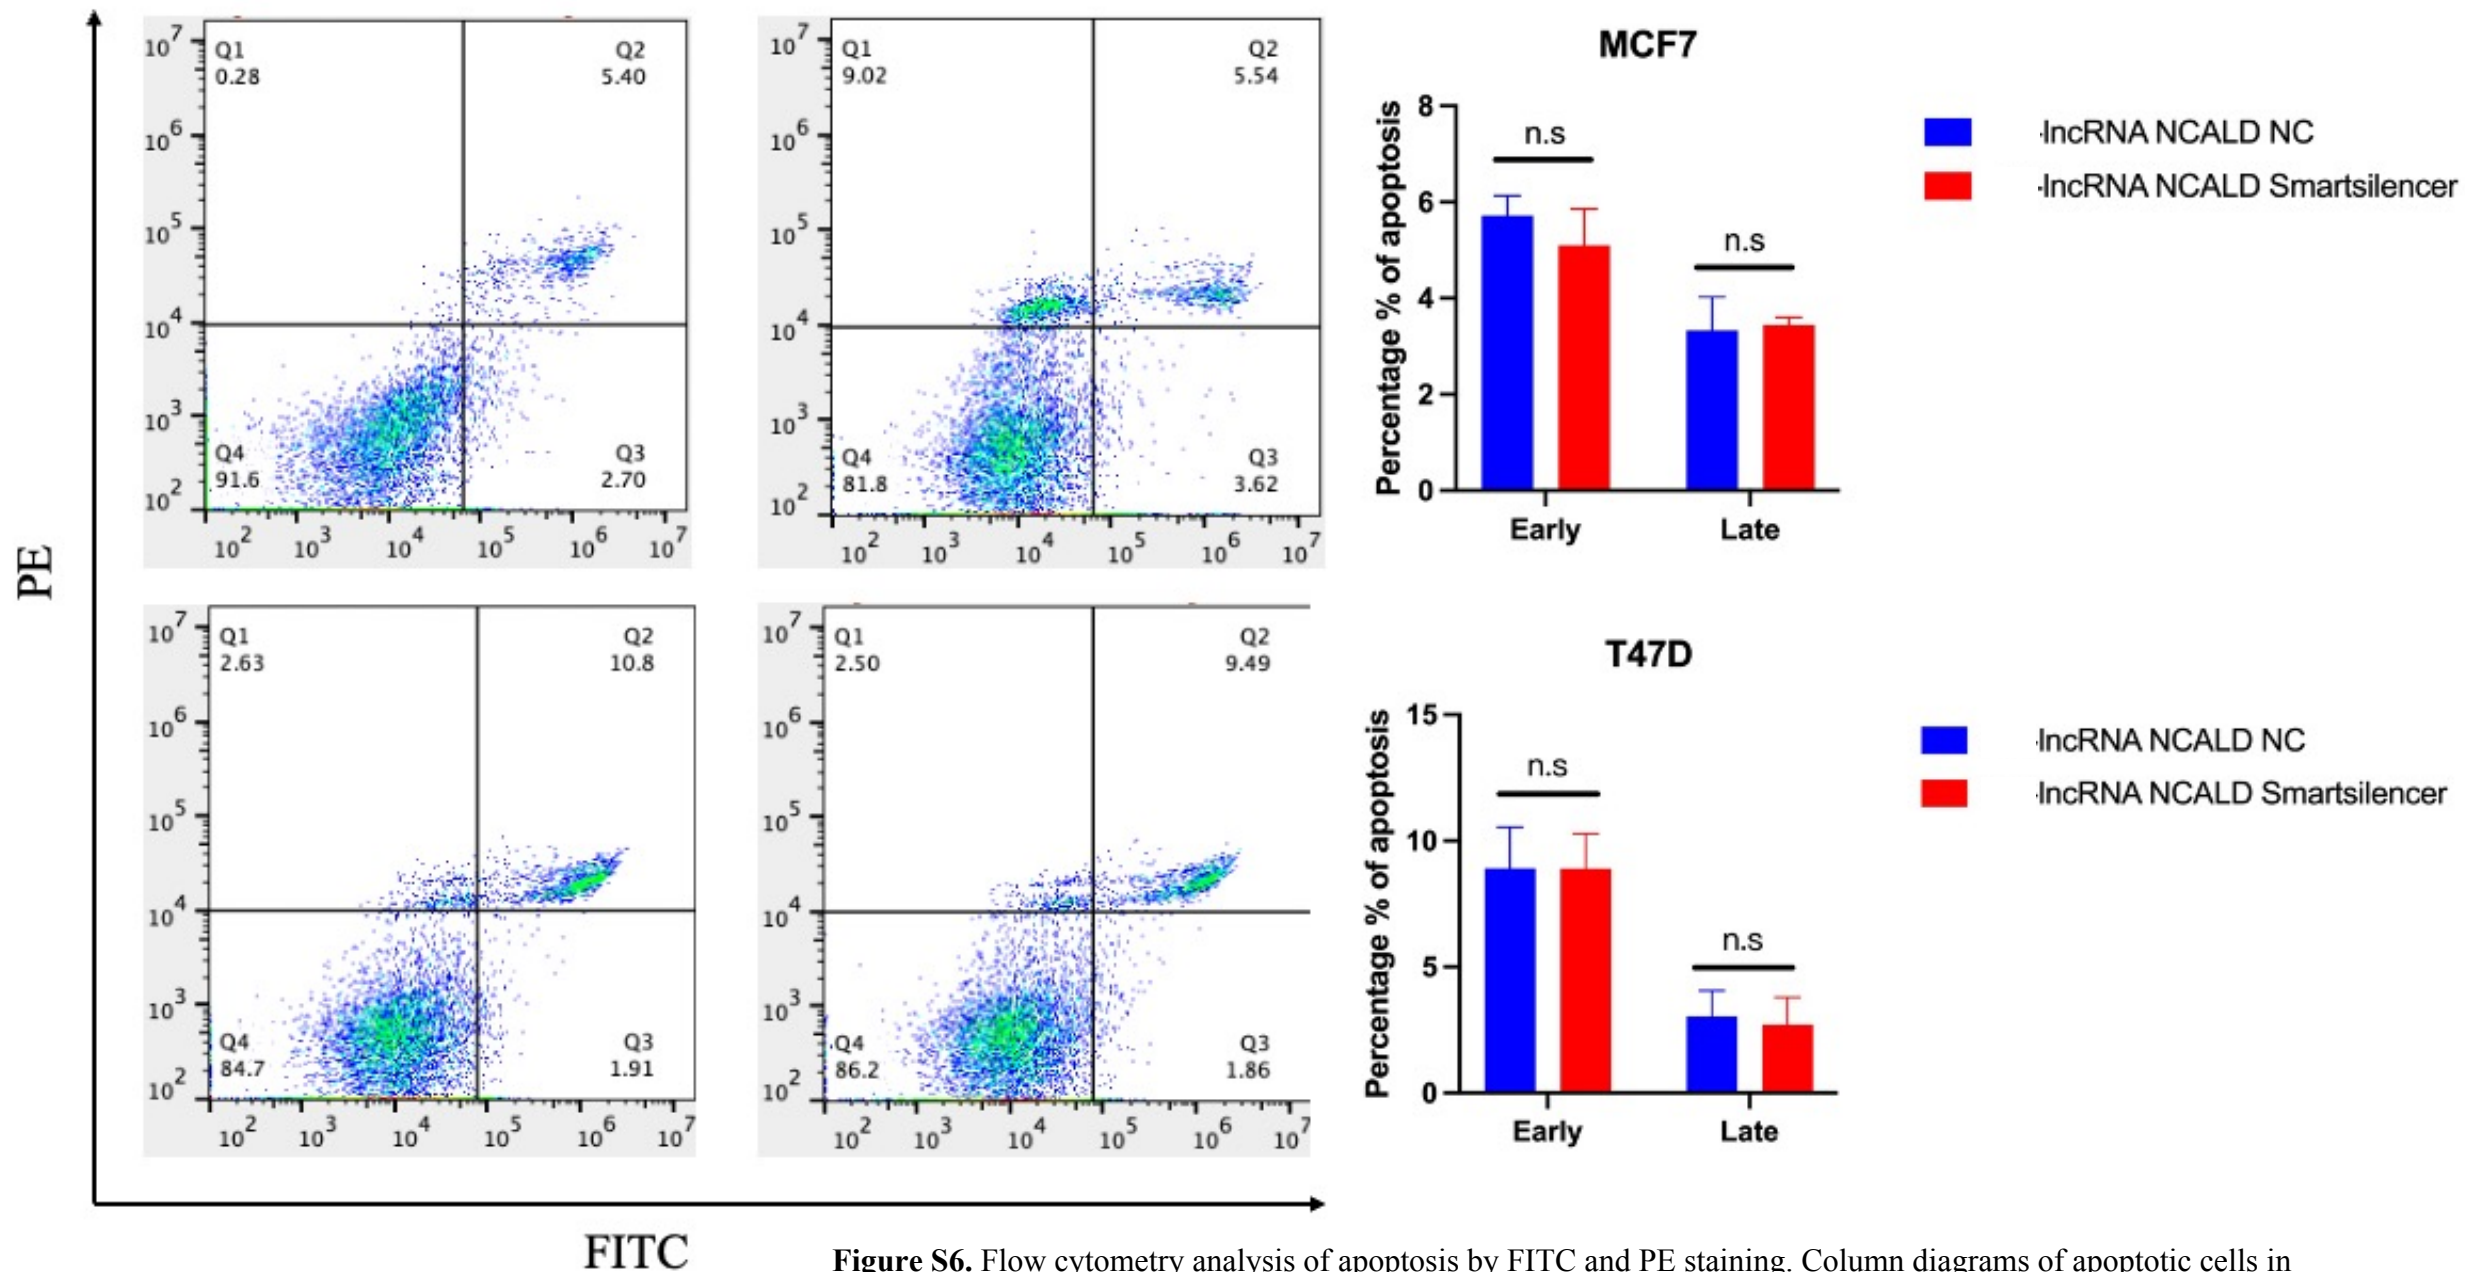

**Figure S6.** Flow cytometry analysis of apoptosis by FITC and PE staining. Column diagrams of apoptotic cells in percentage (n.s means no significant difference). All experiments were biologically replicated three times.



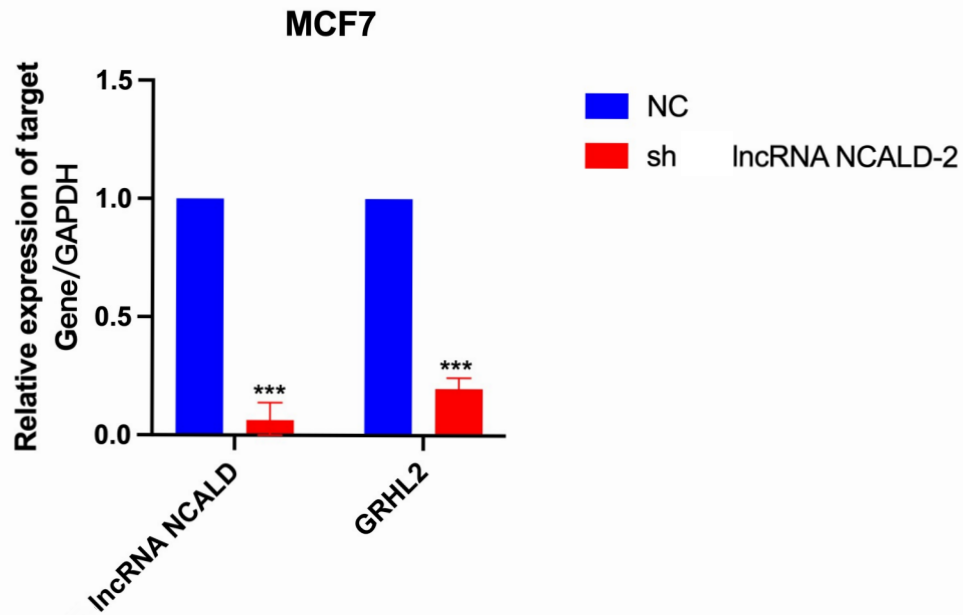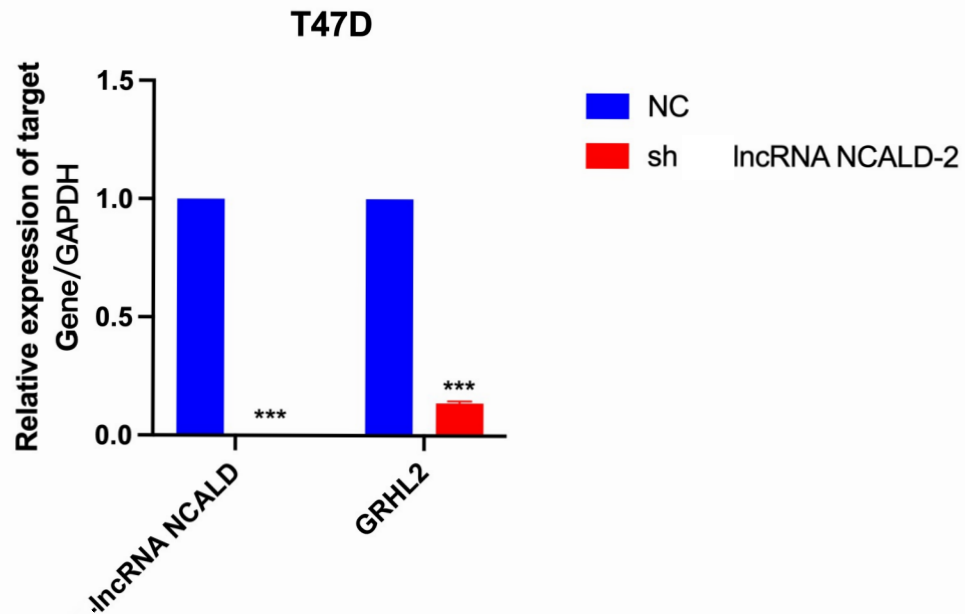

**Figure S7.** Knockdown of lncRNA NCALD caused by sh-lncRNA NCALD-2 plasmid inhibited GRHL2 expression in RNA level, (n = 3, mean  $\pm$  SD; \*\*\*P < 0.001).

a

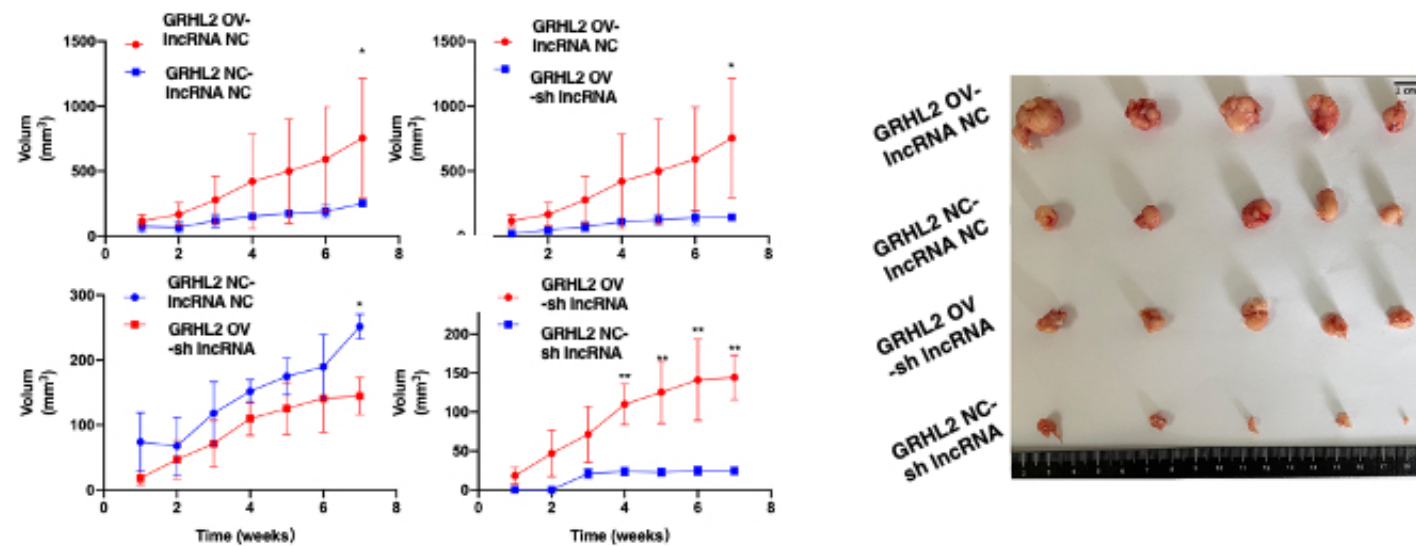

b

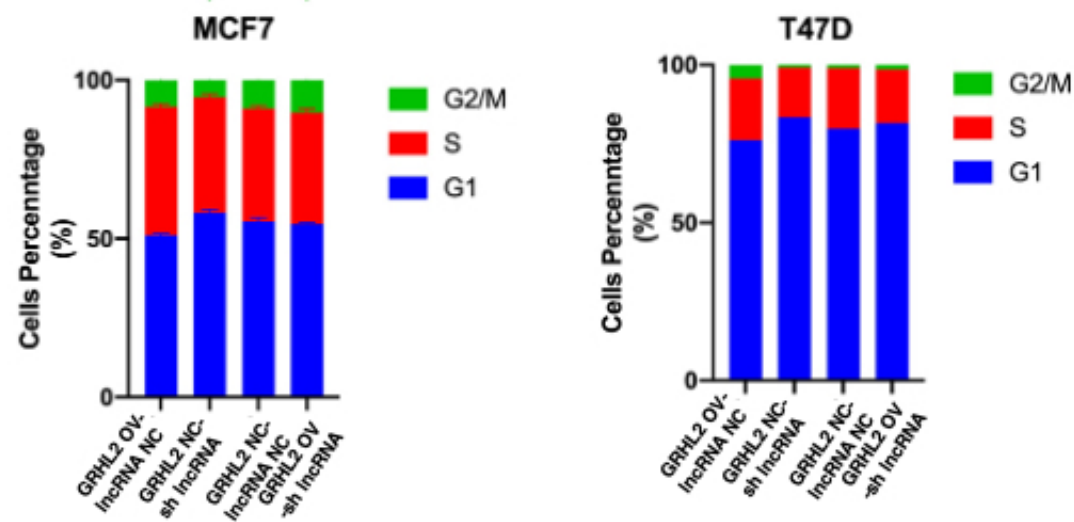

Figure S8. a The significant restoration of GRHL2 effectively reversed the suppressed tumor growth caused by the knockdown of lncRNA NCALD. The data points of the tumor growth curve are presented as the mean  $\pm$  SD (n = 5/group) (\*P < 0.05, \*\*P < 0.01). b. Knockdown of lncRNA NCALD arrested cell in G1 cycle, which can be reversed by the overexpression of GRHL2 (n = 3, mean  $\pm$  SD).

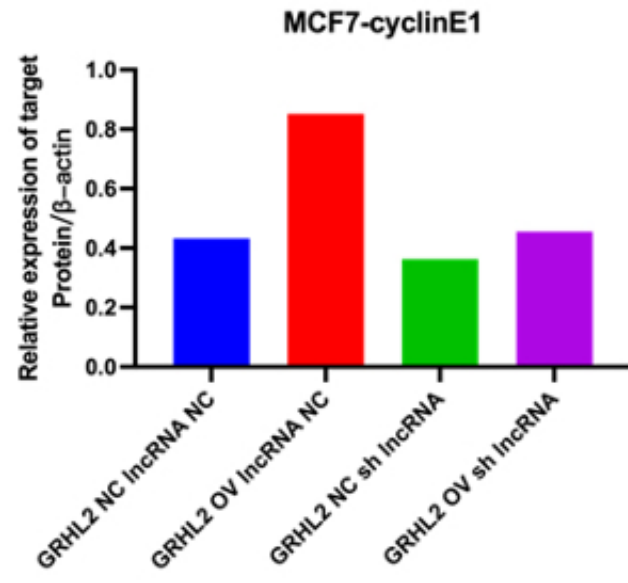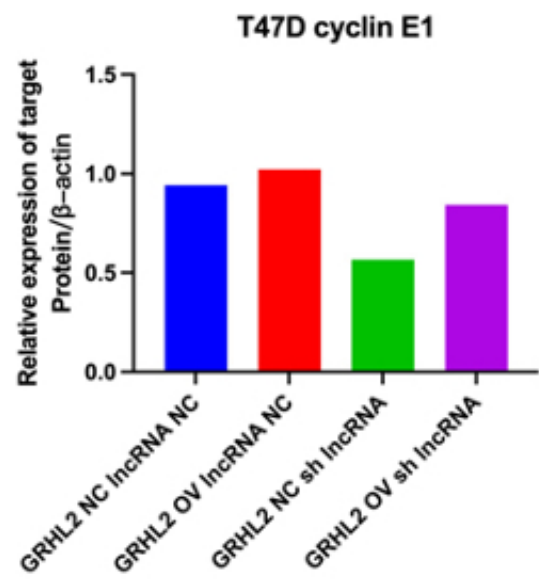

Supplement: MOESM1 [file 26677822]
