# Supplementary material for: An estrogen-regulated long non-coding RNA NCALD promotes luminal breast cancer proliferation by activating GRHL2
Source: Springer Nature journal article supplement (doi:10.1186/s12935-024-03245-0), 2024-01-30
Supplement: MOESM2 [file 26677822]

| ProbeName                          | Fold Change | Regulation | Transcript type | Transcript ID | transcript_type | GeneID          | Raw data of microarray |              |           | locus      | overlapped superenhancer information                                                                                                                                                                                                                                                                                                                                                                                                                                                                                                                                                                                                                                                                                                                                                                                                                                                                                                                                                                                                                                                                                       |
|------------------------------------|-------------|------------|-----------------|---------------|-----------------|-----------------|------------------------|--------------|-----------|------------|----------------------------------------------------------------------------------------------------------------------------------------------------------------------------------------------------------------------------------------------------------------------------------------------------------------------------------------------------------------------------------------------------------------------------------------------------------------------------------------------------------------------------------------------------------------------------------------------------------------------------------------------------------------------------------------------------------------------------------------------------------------------------------------------------------------------------------------------------------------------------------------------------------------------------------------------------------------------------------------------------------------------------------------------------------------------------------------------------------------------------|
|                                    |             |            |                 |               |                 |                 | GeneSymbol             | IncRNA_level | RNAlength |            |                                                                                                                                                                                                                                                                                                                                                                                                                                                                                                                                                                                                                                                                                                                                                                                                                                                                                                                                                                                                                                                                                                                            |
| ASHG19<br>SELNC2<br>A100011<br>138 | 2.6038      | down       | noncoding       | ENST00004516  | noncoding       | ENSG00000224413 | AP001476.2             | Gold         | 2198      | 47459721:+ | chr21:47368269:47414613:Aorta;chr21:47368978:47399878:Fetal Muscle;chr21:47370640:47418875:Stomach Smooth Muscle;chr21:47373022:47488156:Ovary;chr21:47373188:47425562:NHDF-Ad;chr21:47373962:47413579:Lung;chr21:47390790:47421807:Esophagus;chr21:47390883:47405694:Bladder;chr21:47390890:47405005:NHLF;chr21:47441142:47554313:NHDF-Ad;chr21:47441234:47488057:Sigmoid Colon;chr21:47441247:47488321:Fetal Muscle;chr21:47441257:47531436:Esophagus;chr21:47444324:47564240:Osteoblasts;chr21:47444870:47513373:Astrocytes;chr21:47447910:47520896:NHLF;chr21:47457705:47513717:u87;chr21:47458019:47488324:Aorta;chr21:47468502:47488351:Stomach Smooth Muscle;chr21:47468608:47520268:IMR90;chr21:475287104:CD20;chr20:56229534:56258510:Jurkat;chr20:56246672:56287104:CD20;chr20:56251067:56284317:Brain Anterior Caudate;chr20:56252467:56259279:MM1S;chr20:56253372:56286564:Ly4;chr20:56255682:56294468:Aorta;chr20:56257900:56300726:Adipose Nuclei;chr20:56261450:56303879:HCC1954;chr20:56261686:56292224:HMEC;chr20:56261714:56293621:NHEK;chr20:56261966:56294255:VACO 503;chr20:56262534:56294254:VACO 9m |
| ASHG19<br>SELNC2<br>A100007<br>759 | 3.0444      | up         | noncoding       | uc002xy       | noncoding       | AK056098        | AK056098               |              | 2570      | 56287808:+ |                                                                                                                                                                                                                                                                                                                                                                                                                                                                                                                                                                                                                                                                                                                                                                                                                                                                                                                                                                                                                                                                                                                            |



|         |        |      |           |         |         |            |          |          |     |            |                               |
|---------|--------|------|-----------|---------|---------|------------|----------|----------|-----|------------|-------------------------------|
| ASHG19  |        |      |           |         |         |            |          |          |     |            |                               |
| SELNC2  |        |      |           | ENST00  |         |            |          |          |     | chr20:2361 |                               |
| A100017 |        |      |           | 0006029 | noncodi | ENSG000002 | RP11-    |          |     | 2463-      |                               |
| 010     | 2.3424 | down | noncoding | 77      | ng      | 70001      | 218C14.8 | Reliable | 491 | 23612953:- | chr20:23609017:23622743:HepG2 |

|         |        |      |           |         |         |            |            |      |     |   |  |                                                     |
|---------|--------|------|-----------|---------|---------|------------|------------|------|-----|---|--|-----------------------------------------------------|
| ASHG19  |        |      |           |         |         |            |            |      |     |   |  | chr2:16294                                          |
| SELNC2  |        |      |           | ENST00  |         |            |            |      |     |   |  | 9939-                                               |
| A100016 |        |      |           | 0004322 | noncodi | ENSG000002 |            |      |     |   |  | 162951364: chr2:162912779:162950883:Fetal Intestine |
| 678     | 2.1005 | down | noncoding | 51      | ng      | 33397      | AC008063.3 | Gold | 619 | + |  | Large;chr2:162945520:162950998:NHEK                 |

|         |       |      |           |         |         |            |            |     |   |                                |
|---------|-------|------|-----------|---------|---------|------------|------------|-----|---|--------------------------------|
| ASHG19  |       |      |           |         |         |            |            |     |   | chr2:18786                     |
| SELNC2  |       |      |           | ENST00  |         |            |            |     |   | 7947-                          |
| A100133 |       |      |           | 0004535 | noncodi | ENSG000002 |            |     |   | 188392007:                     |
| 219     | 2.696 | down | noncoding | 17      | ng      | 24063      | AC007319.1 | 802 | + | chr2:188267043:188314011:HUVEC |



|         |       |    |           |         |         |            |           |     |            |                                                                                                              |
|---------|-------|----|-----------|---------|---------|------------|-----------|-----|------------|--------------------------------------------------------------------------------------------------------------|
| ASHG19  |       |    |           |         |         |            |           |     |            | chr16:54954572:54971158:u87;chr16:54956669:54972978:Left                                                     |
| SELNC2  |       |    |           | ENST00  |         |            |           |     |            | chr16:54968825- Ventricle;chr16:54956715:54973307:Lung;chr16:54959639:54972666:HMEC;chr16:54961499:54972180: |
| A100018 |       |    |           | 0005604 | noncodi | ENSG000002 | CTD-      |     |            |                                                                                                              |
| 404     | 3.416 | up | noncoding | 87      | ng      | 59711      | 3032H12.2 | 359 | 54988577:+ | Gastric                                                                                                      |

|         |        |      |           |         |         |            |          |  |     |                                                   |
|---------|--------|------|-----------|---------|---------|------------|----------|--|-----|---------------------------------------------------|
| ASHG19  |        |      |           |         |         |            |          |  |     | chr12:1237                                        |
| SELNC2  |        |      |           | ENST00  |         |            |          |  |     | 43524-                                            |
| A100509 |        |      |           | 0005448 | noncodi | ENSG000002 | RP11-    |  |     | 123745766: chr12:123707408:123763358:CD34 Primary |
| 795     | 6.2257 | down | noncoding | 90      | ng      | 35423      | 282O18.3 |  | 796 | -                                                 |
|         |        |      |           |         |         |            |          |  |     | 123728805:Fetal Thymus                            |

|         |        |      |           |         |         |            |            |  |      |                             |
|---------|--------|------|-----------|---------|---------|------------|------------|--|------|-----------------------------|
| ASHG19  |        |      |           |         |         |            |            |  |      | chr13:8061                  |
| SELNC2  |        |      |           | MICT00  |         |            |            |  |      | 5818-                       |
| A100010 |        |      |           | 0000967 | noncodi | CATG000000 | CATG000000 |  |      | 80629005:-                  |
| 845     | 2.2008 | down | noncoding | 12      | ng      | 17584      | 17584.1    |  | 2380 | chr13:80593904:80631065:u87 |

|         |        |    |           |         |         |            |         |          |     |                                                                                                 |
|---------|--------|----|-----------|---------|---------|------------|---------|----------|-----|-------------------------------------------------------------------------------------------------|
| ASHG19  |        |    |           |         |         |            |         |          |     | chr8:80927615:81085156:CD20;chr8:81033109:81081429:Brain Cingulate                              |
| SELNC2  |        |    |           | ENST00  |         |            |         |          |     | Gyrus;chr8:81033331:81084576:Tonsil;chr8:81033340:81084616:CD19                                 |
| A100010 |        |    |           | 0005224 | noncodi | ENSG000002 | RP11-   |          |     | Primary;chr8:81033954:81085230:Ly1;chr8:81045809:81084636:GM12878;chr8:81048638:81085059:DH087- |
| 672     | 7.0859 | up | noncoding | 94      | ng      | 54205      | 92K15.1 | Reliable | 364 | 81039905:+ 81085173:Ly4;chr8:81048776:81084522:MM1S                                             |



|         |        |    |           |         |         |            |           |  |      |            |                                                    |
|---------|--------|----|-----------|---------|---------|------------|-----------|--|------|------------|----------------------------------------------------|
| ASHG19  |        |    |           |         |         |            |           |  |      |            | chr19:33731236:33808732:Colon Crypt                |
| SELNC2  |        |    |           | ENST00  |         |            |           |  |      |            | 3;chr19:33738816:33795450:CD14;chr19:33751162:     |
| A100004 |        |    |           | 0005929 | noncodi | ENSG000002 |           |  |      |            | 33802757:Lung;chr19:33762587:33809528:Colon        |
| 675     | 2.6437 | up | noncoding | 82      | ng      | 67296      | CEBPA-AS1 |  | 2198 |            | Crypt 1;chr19:33763913:33809521:VACO               |
|         |        |    |           |         |         |            |           |  |      |            | 400;chr19:33764237:33808704:Sigmoid                |
|         |        |    |           |         |         |            |           |  |      |            | Colon;chr19:33764326:33809516:Colon Crypt          |
|         |        |    |           |         |         |            |           |  |      |            | 2;chr19:33764404:33802495:Esophagus;chr19:33764    |
|         |        |    |           |         |         |            |           |  |      |            | 408:33808979:Fetal                                 |
|         |        |    |           |         |         |            |           |  |      |            | Intestine;chr19:33764433:33802794:Gastric;chr19:33 |
|         |        |    |           |         |         |            |           |  |      |            | 764450:33808989:Fetal Intestine                    |
|         |        |    |           |         |         |            |           |  |      | chr19:3379 | Large;chr19:33764588:33796341:HepG2;chr19:33781    |
|         |        |    |           |         |         |            |           |  |      | 3763-      | 201:33808848:Small                                 |
|         |        |    |           |         |         |            |           |  |      | 33795960;+ | Intestine;chr19:33782013:33802787:LNCaP            |

ASHG19  
 SELNC2  
 A100003  
 993 9.1453 up noncoding 81 ENST00  
 0006052 noncodi ENSG000002 RP3-  
 71367 483K16.4 Reliable 548

chr6:53036329:53227410:CD20;chr6:53036599:5311  
 6245:CD19  
 Primary;chr6:53100514:53226188:Adipose  
 Nuclei;chr6:53128178:53225333:CD14;chr6:5314302  
 7:53229608:Jurkat;chr6:53146409:53227384:CD4p  
 CD25- Il17- PMAstim  
 Th;chr6:53146723:53227390:CD4p CD25- Il17p  
 PMAstim Th17;chr6:53154779:53227532:Fetal  
 Thymus;chr6:53154998:53228030:DND41;chr6:5315  
 8989:53180047:RPML-  
 8402;chr6:53163931:53226897:Pancl;chr6:53164749  
 :53181309:HUVEC;chr6:53165560:53203522:Thym  
 us;chr6:53166397:53227225:CD34 Primary  
 RO01536;chr6:53190554:53225640:CD19  
 Primary;chr6:53190767:53225498:Ly4;chr6:5319608  
 5:53227890:CD4p CD25- CD45ROp  
 Memory;chr6:53196226:53227225:CD4 Memory  
 Primary 7pool;chr6:53196256:53227329:CD8  
 primariy;chr6:53196355:53227514:CD4p CD25-  
 CD45RAp Naive;chr6:53196563:53227334:CD4p  
 CD225int CD127p  
 Tmem;chr6:53196686:53227248:CD3;chr6:53196787  
 :53227022:Tonsil;chr6:53197275:53227398:CD56;ch  
 r6:53197489:53227236:CD4 Memory Primary  
 8pool;chr6:53197881:53224849:CD4 Naive Primary  
 7pool;chr6:53198177:53226968:CD4 Naive Primary  
 8pool;chr6:53199221:53226955:CD8 Naive  
 956- 7pool;chr6:53199226:53226968:CD8 Memory  
 53215503:+ 7pool;chr6:53199602:53225903:Fetal Muscle

|         |        |      |           |         |         |            |              |          |      |                                                               |
|---------|--------|------|-----------|---------|---------|------------|--------------|----------|------|---------------------------------------------------------------|
| ASHG19  |        |      |           |         |         |            |              |          |      | chr15:2996                                                    |
| SELNC2  |        |      |           | ENST00  |         |            |              |          |      | 7194-                                                         |
| A101070 |        |      |           | 0005368 | noncodi | ENSG000002 |              |          |      | chr15:29962239:29981983:Colon Crypt                           |
| 378     | 3.745  | down | noncoding | 35      | ng      | 56802      | RP11-680F8.1 | Reliable | 2530 | 29971372:+                                                    |
|         |        |      |           |         |         |            |              |          |      | 1;chr15:29962672:29981651:Colon Crypt 2                       |
|         |        |      |           |         |         |            |              |          |      | chr3:197182362:197247617:Osteoblasts;chr3:197182              |
|         |        |      |           |         |         |            |              |          |      | 483:197251089:Pancreatic                                      |
|         |        |      |           |         |         |            |              |          |      | islets;chr3:197182511:197222729:HSMMtube;chr3:1               |
|         |        |      |           |         |         |            |              |          |      | 97182681:197248452:u87;chr3:197182694:19721995                |
|         |        |      |           |         |         |            |              |          |      | 9:HSMM;chr3:197182708:197219870:Skeletal                      |
|         |        |      |           |         |         |            |              |          |      | Muscle                                                        |
|         |        |      |           |         |         |            |              |          |      | Myoblast;chr3:197191173:197199703:HepG2;chr3:1                |
|         |        |      |           |         |         |            |              |          |      | 97205399:197248702:VACO                                       |
|         |        |      |           |         |         |            |              |          |      | 9m;chr3:197208959:197283348:Esophagus;chr3:197                |
|         |        |      |           |         |         |            |              |          |      | 219947:197251007:Colon Crypt                                  |
|         |        |      |           |         |         |            |              |          |      | 1;chr3:197219992:197250392:Colon Crypt                        |
| ASHG19  |        |      |           |         |         |            |              |          |      | chr3:19723                                                    |
| SELNC2  |        |      |           | ENST00  |         |            |              |          |      | 2133-                                                         |
| A100013 |        |      |           | 0006082 | noncodi | ENSG000002 |              |          |      | Intestine;chr3:197238701:197250196:Fetal                      |
| 142     | 3.4703 | up   | noncoding | 06      | ng      | 72989      | RP13-616I3.1 | Reliable | 1725 | 197233857: Intestine;chr3:197238747:197250317:Fetal Intestine |
|         |        |      |           |         |         |            |              |          |      | - Large;chr3:197274001:197287045:Colon Crypt 3                |

|         |       |    |           |         |         |            |              |     |            |                               |
|---------|-------|----|-----------|---------|---------|------------|--------------|-----|------------|-------------------------------|
| ASHG19  |       |    |           |         |         |            |              |     |            |                               |
| SELNC2  |       |    |           | ENST00  |         |            |              |     | chr16:7159 |                               |
| A100981 |       |    |           | 0005615 | noncodi | ENSG000002 |              |     | 9692-      |                               |
| 549     | 6.247 | up | noncoding | 29      | ng      | 60886      | RP11-432I5.1 | 873 | 71612090:+ | chr16:71605152:71608364:HepG2 |

|         |        |      |           |         |         |            |           |      |            |                                    |
|---------|--------|------|-----------|---------|---------|------------|-----------|------|------------|------------------------------------|
| ASHG19  |        |      |           |         |         |            |           |      |            |                                    |
| SELNC2  |        |      |           | ENST00  |         |            |           |      | chr15:9681 |                                    |
| A100839 |        |      |           | 0005021 | noncodi | ENSG000002 |           |      | 2001-      |                                    |
| 170     | 5.3554 | down | noncoding | 25      | ng      | 47809      | NR2F2-AS1 | 1930 | 96870590:- | chr15:96811654:96841238:Astrocytes |

ASHG19  
 SELNC2  
 A100839  
 170 5.3554 down noncoding 25 ng 47809 NR2F2-AS1

1930

chr15:9681  
 2001-  
 96870590:-

chr15:96843 / 94:96900430:1 et al  
 Muscle;chr15:96843842:96906957:Spleen;chr15:968  
 45619:96910635:Stomach Smooth  
 Muscle;chr15:96854958:96904044:Ovary;chr15:9685  
 9803:96901322:Duodenum Smooth  
 Muscle;chr15:96860092:96903991:HUVEC;chr15:96  
 860236:96900756:Right  
 Atrium;chr15:96860251:96903800:Lung;chr15:96860  
 327:96939510:Gastric;chr15:96863690:96903716:As  
 trocytes;chr15:96863797:96905060:Esophagus;chr15:  
 96863802:96904281:Left  
 Ventricle;chr15:96863879:96904071:Brain  
 Hippocampus  
 Middle;chr15:96863927:96903646:Adrenal  
 Gland;chr15:96863929:96900992:Skeletal  
 Muscle;chr15:96864068:96901557:Panc1;chr15:9686  
 4146:96912049:Pancreatic  
 islets;chr15:96864155:96891159:Psoas  
 Muscle;chr15:96864262:96901557:Brain  
 Hippocampus Middle  
 150;chr15:96864441:96903811:Sigmoid  
 Colon;chr15:96864462:96898142:Aorta;chr15:96864  
 499:96901249:Osteoblasts;chr15:96864502:9689826  
 3:Small  
 Intestine;chr15:96864556:96903688:NHLF;chr15:968  
 64606:96898944:NHDF-  
 Ad;chr15:96864624:96898150:Bladder;chr15:968670  
 16:96901350:Adipose  
 Nuclei;chr15:96867102:96898961:IMR90;chr15:9686  
 7427:96884039:MCF-

|         |       |      |           |         |           |            |           |     |  |                                                                                                       |
|---------|-------|------|-----------|---------|-----------|------------|-----------|-----|--|-------------------------------------------------------------------------------------------------------|
| ASHG19  |       |      |           |         |           |            |           |     |  | chr10:11034219:11079146:HSMMtube;chr10:11049192:11078288:HSMM;chr10:11049251:11078274:Skeletal Muscle |
| SELNC2  |       |      |           | ENST00  |           |            |           |     |  | chr10:11117094-                                                                                       |
| A101017 |       |      |           | 0004323 | noncoding | ENSG000002 |           |     |  | Myoblast;chr10:11051880:11069686:Fetal Muscle;chr10:11054424:11131833:Left Ventricle                  |
| 201     | 3.519 | down | noncoding | 70      | ng        | 37986      | CELF2-AS2 | 853 |  |                                                                                                       |

|         |        |    |           |         |           |            |               |     |  |                                                                                                                                                                                                                                                                                                                                                                                                                                                                                                           |
|---------|--------|----|-----------|---------|-----------|------------|---------------|-----|--|-----------------------------------------------------------------------------------------------------------------------------------------------------------------------------------------------------------------------------------------------------------------------------------------------------------------------------------------------------------------------------------------------------------------------------------------------------------------------------------------------------------|
| ASHG19  |        |    |           |         |           |            |               |     |  | chr11:113102167:113146901:Brain Inferior Temporal Lobe;chr11:113102330:113150528:Brain Anterior Caudate;chr11:113103771:113146672:Brain Hippocampus                                                                                                                                                                                                                                                                                                                                                       |
| SELNC2  |        |    |           | ENST00  |           |            |               |     |  | chr11:113149275-                                                                                                                                                                                                                                                                                                                                                                                                                                                                                          |
| A100198 |        |    |           | 0005264 | noncoding | ENSG000002 | RP11-839D17.3 |     |  | 113185146: Middle;chr11:113104958:113150986:Brain Cingulate Gyrus;chr11:113110834:113160849:HSMMtube chr20:56229534:56258510:Jurkat;chr20:56246672:56287104:CD20;chr20:56251067:56284317:Brain Anterior Caudate;chr20:56252467:56259279:MM1S;chr20:56253372:56286564:Ly4;chr20:56255682:56294468:Arorta;chr20:56257900:56300726:Adipose Nuclei;chr20:56261450:56303879:HCC1954;chr20:56261686:56292224:HMEC;chr20:56261714:56293621:NHEK;chr20:56261966:56294255:VACO 503;chr20:56262534:56294254:VACO 9m |
| 090     | 2.8499 | up | noncoding | 87      | ng        | 55129      |               | 588 |  |                                                                                                                                                                                                                                                                                                                                                                                                                                                                                                           |

|         |        |    |           |        |           |       |       |      |      |                 |
|---------|--------|----|-----------|--------|-----------|-------|-------|------|------|-----------------|
| ASHG19  |        |    |           |        |           |       |       |      |      | chr20:56285239- |
| SELNC2  |        |    |           | NR_131 | noncoding |       |       |      |      | 56287836:+      |
| A100006 |        |    |           | 157    | ng        | NKILA | NKILA | Gold | 2615 |                 |
| 978     | 5.0289 | up | noncoding | 157    | ng        | NKILA | NKILA | Gold | 2615 |                 |

|         |       |    |           |         |         |            |         |          |     |                                                                                             |
|---------|-------|----|-----------|---------|---------|------------|---------|----------|-----|---------------------------------------------------------------------------------------------|
| ASHG19  |       |    |           |         |         |            |         |          |     | chr8:80927615:81085156:CD20;chr8:81033109:81081429:Brain Cingulate                          |
| SELNC2  |       |    |           | ENST00  |         |            |         |          |     | Gyrus;chr8:81033331:81084576:Tonsil;chr8:81033340:81084616:CD19                             |
| A100006 |       |    |           | 0006070 | noncodi | ENSG000002 | RP11-   |          |     | Primary;chr8:81033954:81085230:Ly1;chr8:81045809:81084636:GM12878;chr8:81048638:81085059:DH |
| 209     | 11.48 | up | noncoding | 17      | ng      | 72264      | 92K15.3 | Reliable | 577 | 80945535:- 81085173:Ly4;chr8:81048776:81084522:MM1S                                         |



|         |        |      |           |         |         |            |       |      |   |  |                                                                                                                                                                                                                                                                                                                                                                                           |
|---------|--------|------|-----------|---------|---------|------------|-------|------|---|--|-------------------------------------------------------------------------------------------------------------------------------------------------------------------------------------------------------------------------------------------------------------------------------------------------------------------------------------------------------------------------------------------|
| ASHG19  |        |      |           |         |         |            |       |      |   |  | chr11:128539687:128591438:RPMI-8402;chr11:128546321:128643284:CD34 Primary                                                                                                                                                                                                                                                                                                                |
| SELNC2  |        |      |           | ENST00  |         |            |       |      |   |  | RO01536;chr11:128547574:128600678:HUVEC;chr11:128547730:128674908:Spleen;chr11:128555577:128610042:Ly1;chr11:128555988:128567972:Tonsil;chr11:128560125:128616737:Lung;chr11:128560330:128599656:Adipose                                                                                                                                                                                  |
| A100008 |        |      |           | 0005262 | noncodi | ENSG000002 |       |      |   |  | Nuclei;chr11:128561748:128599291:Right Atrium;chr11:128561882:128591019:Fetal Muscle;chr11:128562324:128604385:Osteoblasts;chr11:128562350:128654166:CD14;chr11:128562395:128679347:CD20;chr11:128562503:128605194:Small Intestine;chr11:128562685:128628864:CD8 primariy;chr11:128562700:128628023:CD56;chr11:128562767:128628950:Ly4;chr11:128562805:128677186:CD4p CD25- II17- PMAstim |
| 357     | 2.1313 | down | noncoding | 69      | ng      | 54703      | SENCR | 1298 | - |  | Th;chr11:128563170:128609883:DND41;chr11:128564879:128611094:Jurkat;chr11:128582503:128610944:CD19                                                                                                                                                                                                                                                                                        |
|         |        |      |           |         |         |            |       |      |   |  | Primary;chr11:128582760:128618325:CD3;chr11:128582794:128629104:Tonsil;chr11:128585066:1286061567-9559:DHL6;chr11:128585163:128630250:MM1S;chr11:128585301:128610080:Sigmoid                                                                                                                                                                                                              |
|         |        |      |           |         |         |            |       |      |   |  | Colon;chr11:128585928:128609212:Thymus                                                                                                                                                                                                                                                                                                                                                    |

|         |        |    |           |         |            |       |            |      |      |                                               |
|---------|--------|----|-----------|---------|------------|-------|------------|------|------|-----------------------------------------------|
| ASHG19  |        |    |           |         |            |       |            |      |      | chr8:125483998:125489483:CD4 Memory Primary   |
| SELNC2  |        |    | ENST00    |         |            |       |            |      |      | 7pool;chr8:125484090:125489608:CD8 Memory     |
| A100515 |        |    | 0005307   | noncodi | ENSG000002 |       |            |      |      | 7pool;chr8:125485153:125489587:CD4 Memory     |
| 178     | 8.6375 | up | noncoding | 78      | ng         | 45149 | RNF139-AS1 | Gold | 1767 | Primary 8pool;chr8:125485354:125489304:CD4    |
|         |        |    |           |         |            |       |            |      |      | chr8:12548                                    |
|         |        |    |           |         |            |       |            |      |      | Naive Primary                                 |
|         |        |    |           |         |            |       |            |      |      | 5051-                                         |
|         |        |    |           |         |            |       |            |      |      | 8pool;chr8:125485368:125489205:CD8 Naive      |
|         |        |    |           |         |            |       |            |      |      | 125486817:                                    |
|         |        |    |           |         |            |       |            |      |      | 7pool;chr8:125485632:125489329:CD4 Naive      |
|         |        |    |           |         |            |       |            |      |      | Primary 7pool;chr8:125485702:125489235:Spleen |

|         |        |      |           |         |         |            |              |     |            |                                                  |
|---------|--------|------|-----------|---------|---------|------------|--------------|-----|------------|--------------------------------------------------|
| ASHG19  |        |      |           |         |         |            |              |     |            | chr1:27717086:27764296:Brain                     |
| SELNC2  |        |      |           | ENST00  |         |            |              |     |            | Hippocampus Middle;chr1:27721859:27765916:Left   |
| A100008 |        |      |           | 0004404 | noncodi | ENSG000002 |              |     |            | Ventricle;chr1:27724397:27820500:CD20;chr1:27725 |
| 954     | 3.1131 | down | noncoding | 92      | ng      | 33975      | RP11-288L9.1 | 441 | 27989233:- | 337:27778490:Fetal                               |
|         |        |      |           |         |         |            |              |     |            | Muscle;chr1:27727708:27765915:Adipose            |
|         |        |      |           |         |         |            |              |     |            | Nuclei;chr1:27727756:27763633:Esophagus;chr1:277 |
|         |        |      |           |         |         |            |              |     |            | 27767:27766345:Toledo;chr1:27728493:27766344:H   |
|         |        |      |           |         |         |            |              |     |            | SMMtube;chr1:27728639:27778340:Brain Anterior    |
|         |        |      |           |         |         |            |              |     |            | Caudate;chr1:27728653:27765964:Brain Cingulate   |
|         |        |      |           |         |         |            |              |     |            | Gyrus;chr1:27728715:27819731:CD14;chr1:2772871   |
|         |        |      |           |         |         |            |              |     |            | 8:27764261:Brain Inferior Temporal               |
|         |        |      |           |         |         |            |              |     |            | Lobe;chr1:27728799:27782366:Duodenum Smooth      |
|         |        |      |           |         |         |            |              |     |            | Muscle;chr1:27728807:27763107:Thymus;chr1:2772   |
|         |        |      |           |         |         |            |              |     |            | 8880:27762357:CD34 Primary                       |
|         |        |      |           |         |         |            |              |     |            | RO01536;chr1:27728950:27761500:Brain Angular     |
|         |        |      |           |         |         |            |              |     |            | Gyrus;chr1:27743024:27792274:MM1S;chr1:277998    |
|         |        |      |           |         |         |            |              |     |            | 73:27826360:DHL6;chr1:27801410:27856116:Tonsil   |
|         |        |      |           |         |         |            |              |     |            | ;chr1:27808338:27869987:Brain Cingulate          |
|         |        |      |           |         |         |            |              |     |            | Gyrus;chr1:27814191:27931064:Fetal Intestine     |
|         |        |      |           |         |         |            |              |     |            | Large;chr1:27814202:27903953:Brain Hippocampus   |
|         |        |      |           |         |         |            |              |     |            | Middle 150;chr1:27814251:27929612:Fetal          |
|         |        |      |           |         |         |            |              |     |            | Intestine;chr1:27814257:27905229:HSMtube;chr1:   |
|         |        |      |           |         |         |            |              |     |            | 27814303:27902896:Colon Crypt                    |
|         |        |      |           |         |         |            |              |     |            | 3;chr1:27814306:27934479:Fetal                   |
|         |        |      |           |         |         |            |              |     |            | Muscle;chr1:27814309:27904188:Duodenum Smooth    |
|         |        |      |           |         |         |            |              |     |            | Muscle;chr1:27814337:27930846:Brain Inferior     |
|         |        |      |           |         |         |            |              |     |            | Temporal Lobe;chr1:27814348:27933300:Brain       |
|         |        |      |           |         |         |            |              |     |            | Hippocampus                                      |
|         |        |      |           |         |         |            |              |     |            | Middle;chr1:27814375:27895242:HeLa;chr1:2781439  |





|         |        |      |           |         |         |            |         |          |      |                                                          |
|---------|--------|------|-----------|---------|---------|------------|---------|----------|------|----------------------------------------------------------|
| ASHG19  |        |      |           |         |         |            |         |          |      | chr5:15989                                               |
| SELNC2  |        |      |           | ENST00  |         |            |         |          |      | 5275-                                                    |
| A100703 |        |      |           | 0005179 | noncodi | ENSG000002 |         |          |      | 159914433: chr5:159865596:159905010:GM12878;chr5:1598934 |
| 474     | 3.5479 | down | noncoding | 27      | ng      | 53522      | MIR146A | Reliable | 2301 | + 83:159905754:HepG2                                     |

|         |        |      |           |         |         |            |           |      |            |            |                                                                 |
|---------|--------|------|-----------|---------|---------|------------|-----------|------|------------|------------|-----------------------------------------------------------------|
| ASHG19  |        |      |           |         |         |            |           |      |            |            | chr16:66390995:66420521:HUVEC;chr16:66392024:<br>66418292:Fetal |
| SELNC2  |        |      |           | ENST00  |         |            |           |      |            |            | Muscle;chr16:66392035:66422229:Lung;chr16:66392                 |
| A100016 |        |      |           | 0004999 | noncodi | ENSG000002 |           |      |            | chr16:6644 | 306:66443386:Adipose                                            |
| 780     | 2.0504 | down | noncoding | 66      | ng      | 46898      | LINC00920 | 2147 | 66446038:+ | 2427-      | Nuclei;chr16:66392592:66418106:Left                             |
|         |        |      |           |         |         |            |           |      |            |            | Ventricle;chr16:66392705:66417964:Right Atrium                  |

|         |        |      |           |         |         |            |            |      |            |  |                                                           |
|---------|--------|------|-----------|---------|---------|------------|------------|------|------------|--|-----------------------------------------------------------|
| ASHG19  |        |      |           |         |         |            |            |      |            |  | chr4:25996538:26036432:Osteoblasts;chr4:26013996          |
| SELNC2  |        |      |           | FTMT2   |         |            |            |      |            |  | :26052472:Fetal                                           |
| A100004 |        |      |           | 1400001 | noncodi | CATG000000 | CATG000000 |      |            |  | Muscle;chr4:26015538:26036372:NHDF-                       |
| 771     | 11.247 | down | noncoding | 584     | ng      | 72156      | 72156.1    | 1132 | 26087077:- |  | chr4:26085 Ad;chr4:26050417:26092107:Ly3;chr4:26051599:26 |
|         |        |      |           |         |         |            |            |      |            |  | 096077:HBL1;chr4:26075171:26095996:CD4p                   |
|         |        |      |           |         |         |            |            |      |            |  | CD25- Il17p PMAstim Th17                                  |



ASHG19  
 SELNC2  
 A100009  
 974 2.4696 up noncoding 48 ng 60418 RP3-406A7.7 Reliable 374

ENST00  
 0005642 noncodi ENSG000002

chr6:136626675:136825292:Brain Hippocampus  
 Middle 150;chr6:136645304:136854457:Brain  
 Cingulate Gyrus;chr6:136645356:136705407:Brain  
 Inferior Temporal  
 Lobe;chr6:136722695:136768750:Brain Inferior  
 Temporal Lobe;chr6:136722901:136761865:Brain  
 Anterior Caudate;chr6:136722912:136768334:Brain  
 Hippocampus  
 Middle;chr6:136724053:136766443:Brain Angular  
 Gyrus;chr6:136781412:136855111:Brain Inferior  
 Temporal Lobe;chr6:136811569:136853648:Brain  
 Anterior  
 chr6:13665 Caudate;chr6:136819007:136825461:H1;chr6:136832  
 6852- 967:136853528:Brain Angular  
 136657225: Gyrus;chr6:136837841:136854150:Brain  
 - Hippocampus Middle 150

|         |        |      |           |         |         |            |            |      |  |
|---------|--------|------|-----------|---------|---------|------------|------------|------|--|
| ASHG19  |        |      |           |         |         |            |            |      |  |
| SELNC2  |        |      |           | ENCT00  |         |            |            |      |  |
| A100012 |        |      |           | 0003515 | noncodi | CATG000000 | CATG000000 |      |  |
| 481     | 2.1958 | down | noncoding | 82      | ng      | 78038      | 78038.1    | 2129 |  |

chr5:149503252:149541427:Spleen;chr5:149504602:149543232:Ovary;chr5:149507350:149562929:Aorta;chr5:149507482:149541625:Osteoblasts;chr5:149508783:149544885:Brain Hippocampus Middle;chr5:149509027:149542236:u87;chr5:149510774:149544849:Left Ventricle;chr5:149511246:149544603:Right Atrium;chr5:149513384:149536425:IMR90;chr5:149513886:149544807:Lung;chr5:149516216:149540715:Astrocytes;chr5:149516288:149536416:HSMMtube;chr5:149516544:149566936:Small Intestine;chr5:149516880:149525103:NHLF;chr5:149516932:149565271:Duodenum Smooth Muscle;chr5:149516984:149569007:Fetal Intestine;chr5:149517172:149541546:NHDF-Ad;chr5:149517354:149546152:Fetal Muscle;chr5:149517656:149533391:Brain Mid Frontal Lobe;chr5:149540335:149569333:Fetal Intestine Large;chr5:149540778:149566941:Colon 9613-Crypt 3;chr5:149540841:149566799:Colon Crypt 149541741:2;chr5:149540883:149566877:Colon Crypt 1;chr5:149554619:149566880:Sigmoid Colon

|         |        |    |           |         |            |       |              |      |                                                   |
|---------|--------|----|-----------|---------|------------|-------|--------------|------|---------------------------------------------------|
| ASHG19  |        |    |           |         |            |       |              |      | chr8:67340038:67371615:Psoas                      |
| SELNC2  |        |    | ENST00    |         |            |       |              |      | chr8:67331 Muscle;chr8:67340067:67367435:Skeletal |
| A100003 |        |    | 0004996   | noncodi | ENSG000002 |       |              |      | 824- Muscle;chr8:67340114:67385009:Left           |
| 764     | 2.2432 | up | noncoding | 42      | ng         | 46145 | RP11-346I3.4 | 4366 | 67341212:- Ventricle;chr8:67340126:67368514:Lung  |

ASHG19  
 SELNC2  
 A100018  
 734 2.2986 up noncoding 74 ng 40990 HOXA11-AS

ENST00  
 0005226 noncodi ENSG000002

1549

chr7:271354391:271355301:HMEC;chr7:271354311:271  
 44793:HMEC;chr7:27134611:27149405:HUVEC;chr  
 7:27135447:27166356:Fetal  
 Intestine;chr7:27135483:27172379:Stomach Smooth  
 Muscle;chr7:27135550:27153505:Duodenum Smooth  
 Muscle;chr7:27135686:27164694:Astrocytes;chr7:27  
 135736:27164850:IMR90;chr7:27137333:27163753:  
 Aorta;chr7:27139764:27158843:NHLF;chr7:2714996  
 9:27156855:HCC1954;chr7:27150046:27165993:HU  
 VEC;chr7:27152313:27161149:Esophagus;chr7:2715  
 3676:27170089:Duodenum Smooth  
 Muscle;chr7:27153682:27163924:Pancl;chr7:271536  
 88:27196950:Adipose  
 Nuclei;chr7:27168979:27220885:HUVEC;chr7:27170  
 197:27183467:Duodenum Smooth  
 Muscle;chr7:27175056:27185979:HMEC;chr7:27175  
 128:27193124:NHLF;chr7:27178045:27192976:IMR  
 90;chr7:27178057:27189568:Sigmoid  
 Colon;chr7:27183589:27193724:Fetal  
 Muscle;chr7:27187599:27213613:CD34 Primary  
 RO01536;chr7:27189595:27202231:Sigmoid  
 Colon;chr7:27189615:27192995:VACO  
 400;chr7:27193620:27202197:VACO  
 400;chr7:27194720:27202203:VACO  
 503;chr7:27196844:27213703:CD34 Primary  
 RO01549;chr7:27198105:27233826:Fetal  
 Muscle;chr7:27199735:27220891:Adipose  
 chr7:27225 Nuclei;chr7:27201314:27230078:Osteoblasts;chr7:27  
 027- 202582:27214744:HCT-  
 27228912:+ 116;chr7:27202624:27220717:NHDF-

|         |        |      |           |         |         |            |            |      |   |  |                                      |
|---------|--------|------|-----------|---------|---------|------------|------------|------|---|--|--------------------------------------|
| ASHG19  |        |      |           |         |         |            |            |      |   |  | chr4:11519                           |
| SELNC2  |        |      |           | ENCT00  |         |            |            |      |   |  | 9105-                                |
| A100017 |        |      |           | 0003230 | noncodi | CATG000000 | CATG000000 |      |   |  | 115200511:                           |
| 817     | 2.0847 | down | noncoding | 70      | ng      | 69858      | 69858.1    | 1407 | + |  | chr4:115178056:115208536:Osteoblasts |

|         |        |      |           |         |         |            |           |          |     |            |                                                |
|---------|--------|------|-----------|---------|---------|------------|-----------|----------|-----|------------|------------------------------------------------|
| ASHG19  |        |      |           |         |         |            |           |          |     |            |                                                |
| SELNC2  |        |      |           | ENST00  |         |            |           |          |     | chr14:3850 |                                                |
| A101117 |        |      |           | 0005546 | noncodi | ENSG000002 | CTD-      |          |     | 3492-      | chr14:38532475:38559437:CD56;chr14:38532657:38 |
| 053     | 2.5919 | down | noncoding | 87      | ng      | 59048      | 2058B24.2 | Reliable | 785 | 38663486:- | 559557:CD3                                     |

ASHG19  
SELNC2  
A101117  
053 2.5919 down noncoding 87 ng 59048 2058B24.2 CTD- Reliable 785  
ENST00 chr14:3850  
0005546 noncodi ENSG000002 3492-  
38663486:- chr14:38656566:38667401:H1





|         |        |    |           |         |            |       |            |          |      |                                                           |
|---------|--------|----|-----------|---------|------------|-------|------------|----------|------|-----------------------------------------------------------|
| ASHG19  |        |    |           |         |            |       |            |          |      | chr2:10072                                                |
| SELNC2  |        |    | ENST00    |         |            |       |            |          |      | 1381-                                                     |
| A100017 |        |    | 0004343   | noncodi | ENSG000002 |       |            |          |      | 100723966: chr2:100721400:100762028:CD20;chr2:100746570:1 |
| 348     | 4.1453 | up | noncoding | 01      | ng         | 30393 | AC092667.2 | Reliable | 2586 | + 00768229:Ly3;chr2:100746723:100768009:HBL1              |

|         |        |    |           |         |            |       |           |          |     |                                                 |
|---------|--------|----|-----------|---------|------------|-------|-----------|----------|-----|-------------------------------------------------|
| ASHG19  |        |    |           |         |            |       |           |          |     | chr8:102435163:102487838:HCC1954;chr8:1024461   |
| SELNC2  |        |    | ENST00    |         |            |       |           |          |     | 29:102530125:MCF-                               |
| A100015 |        |    | 0005202   | noncodi | ENSG000002 | KB-   |           |          |     | 7;chr8:102448598:102489535:Panc1;chr8:102500357 |
| 253     | 3.2167 | up | noncoding | 68      | ng         | 54024 | 1562D12.1 | Reliable | 491 | chr8:10247                                      |
|         |        |    |           |         |            |       |           |          |     | :102518753:HCC1954;chr8:102502873:102521092:    |
|         |        |    |           |         |            |       |           |          |     | 3405-                                           |
|         |        |    |           |         |            |       |           |          |     | HMEC;chr8:102503161:102517610:NHEK;chr8:102     |
|         |        |    |           |         |            |       |           |          |     | 102504727:                                      |
|         |        |    |           |         |            |       |           |          |     | 503445:102527174:Colon Crypt                    |
|         |        |    |           |         |            |       |           |          |     | -                                               |
|         |        |    |           |         |            |       |           |          |     | 3;chr8:102503837:102506939:VACO 9m              |

ASHG19  
SELNC2  
A101633  
320

3.7163 down noncoding

ENST00  
0003982 noncodi ENSG000002  
75 ng 14401

KANSL1-AS1

517

chr1/:44044333:44121889:Brain Hippocampus  
Middle;chr17:44096782:44274444:CD4p CD25-  
Il17- PMAstim  
Th;chr17:44164675:44273060:CD14;chr17:44215263  
:44273404:CD20;chr17:44215536:44273507:CD34  
Primary RO01536;chr17:44230984:44273775:CD4p  
CD25- Il17p PMAstim  
Th17;chr17:44248846:44275782:CD4p CD25-  
CD45RAp  
Naive;chr17:44255747:44273300:DHL6;chr17:44256  
258:44272635:Spleen;chr17:44256345:44273776:To  
nsil;chr17:44266427:44273061:CD34 Primary  
RO01549;chr17:44266858:44272835:Brain  
Hippocampus Middle  
150;chr17:44266915:44274107:CD4 Memory  
Primary  
7pool;chr17:44266931:44272683:NHEK;chr17:44267  
055:44273912:CD4 Naive Primary  
8pool;chr17:44267124:44273411:CD8 Memory  
7pool;chr17:44267165:44274318:CD8 Naive  
8pool;chr17:44267190:44275611:Fetal  
Thymus;chr17:44267245:44275852:Jurkat;chr17:442  
67628:44273292:CD8 Naive  
7pool;chr17:44267640:44273898:CD4 Memory  
Primary 8pool;chr17:44268170:44272891:CD34  
Primary RO01480;chr17:44268206:44274185:CD4  
Naive Primary  
0942- 7pool;chr17:44268304:44273419:CD4p CD225int  
44274087:+ CD127p Tmem

|         |        |    |           |         |            |       |            |          |     |                                                            |
|---------|--------|----|-----------|---------|------------|-------|------------|----------|-----|------------------------------------------------------------|
| ASHG19  |        |    |           |         |            |       |            |          |     | chr2:21658                                                 |
| SELNC2  |        |    | ENST00    |         |            |       |            |          |     | 2766- chr2:216516265:216662199:Osteoblasts;chr2:216520     |
| A100003 |        |    | 0004154   | noncodi | ENSG000002 |       |            |          |     | 216584147: 885:216674187:u87;chr2:216545306:216578353:Astr |
| 619     | 3.0351 | up | noncoding | 79      | ng         | 30838 | AC093850.2 | Reliable | 648 | + ocytes;chr2:216556049:216585085:HUVEC                    |

ASHG19

SELNC2

A100007

335 2.7573 down noncoding 76

ENST00

0004421 noncodi ENSG000002

ng

29108

AC005550.4

chr7:15728

003-

697

15735116:+ chr7:15687862:15732963:Fetal Muscle

ASHG19  
 SELNC2 ENCT00  
 A100525 0001340 noncodi CATG000000 CATG000000  
 925 5.6421 down noncoding 95 ng 21187 21187.1 8252

chr14:55517374:55542334:CD20;chr14:55517498:55520386:NHLF;chr14:55537310:55545298:NHEK;chr14:55537362:55546494:HMEC;chr14:55538409:55599024:Esophagus;chr14:55543226:55609720:Fetal Intestine Large;chr14:55543381:55609338:Fetal Intestine;chr14:55543633:55599267:Colon Crypt 3;chr14:55555849:55606206:Osteoblasts;chr14:55555850:55590996:u87;chr14:55556020:55594550:H2171;chr14:55557509:55598917:Colon Crypt 2;chr14:55558308:55599128:Sigmoid Colon;chr14:55558414:55601665:Colon Crypt 1;chr14:55558583:55576148:NHDF-Ad;chr14:55560547:55599401:HeLa;chr14:55563236:55614101:Adipose Nuclei;chr14:55563567:55600547:Right Atrium;chr14:55563760:55599095:Lung;chr14:55563819:55606443:Gastric;chr14:55563949:55599030:Small Intestine;chr14:55563967:55614638:CD14;chr14:55564001:55599376:Duodenum Smooth Muscle;chr14:55564346:55595404:HCC1954;chr14:55564586:55601252:Left Ventricle;chr14:55568071:55575974:HSMMtube;chr14:55568080:55575933:NHLF;chr14:55568260:55575863:HMEC;chr14:55568330:55575714:NHEK;chr14:55568402:55598945:VACO chr14:5554503;chr14:55568405:55576160:Astrocytes;chr14:5555548-68888:55600476:Ovary;chr14:55569710:55575102:Adipose Tissue

ASHG19

SELNC2

A100893

214

2.7086 down

noncoding

ENCT00

0001340

noncodi

CATG000000

CATG000000

94

ng

21187

21187.1

8242

chr14:5554

5548-

55565179:-

chr14:55517374:55542334:CD20;chr14:55517498:55520386:NHLF;chr14:55537310:55545298:NHEK;chr14:55537362:55546494:HMEC;chr14:55538409:55599024:Esophagus;chr14:55543226:55609720:Fetal Intestine Large;chr14:55543381:55609338:Fetal Intestine;chr14:55543633:55599267:Colon Crypt 3;chr14:55555849:55606206:Osteoblasts;chr14:55555850:55590996:u87;chr14:55556020:55594550:H2171;chr14:55557509:55598917:Colon Crypt 2;chr14:55558308:55599128:Sigmoid Colon;chr14:55558414:55601665:Colon Crypt 1;chr14:55558583:55576148:NHDF-Ad;chr14:55560547:55599401:HeLa;chr14:55563236:55614101:Adipose Nuclei;chr14:55563567:55600547:Right Atrium;chr14:55563760:55599095:Lung;chr14:55563819:55606443:Gastric;chr14:55563949:55599030:Small Intestine;chr14:55563967:55614638:CD14;chr14:55564001:55599376:Duodenum Smooth Muscle;chr14:55564346:55595404:HCC1954;chr14:55564586:55601252:Left Ventricle;chr14:55568071:55575974:HSMMtube;chr14:55568080:55575933:NHLF;chr14:55568260:55575863:HMEC;chr14:55568330:55575714:NHEK;chr14:55568402:55598945:VACO chr14:5554503;chr14:55568405:55576160:Astrocytes;chr14:55568888:55600476:Ovary;chr14:55569710:55575102:Adipose Tissue





|         |        |      |           |         |         |            |          |      |            |                                                       |
|---------|--------|------|-----------|---------|---------|------------|----------|------|------------|-------------------------------------------------------|
| ASHG19  |        |      |           |         |         |            |          |      |            | chr8:12757                                            |
| SELNC2  |        |      |           | ENST00  |         |            |          |      |            | 0120-                                                 |
| A100243 |        |      |           | 0005198 | noncodi | ENSG000002 | RP11-    |      |            | 127725660: chr8:127641238:127660919:Brain Hippocampus |
| 511     | 2.5674 | down | noncoding | 80      | ng      | 54286      | 89K10.1  | 574  | +          | Middle 150                                            |
| <br>    |        |      |           |         |         |            |          |      |            |                                                       |
| ASHG19  |        |      |           |         |         |            |          |      |            | chr4:39529                                            |
| SELNC2  |        |      |           | ENST00  |         |            |          |      |            | 639-                                                  |
| A100361 |        |      |           | 0005040 | noncodi | ENSG000002 |          |      |            | chr4:39569641:39642487:CD20;chr4:39609302:3964        |
| 851     | 2.323  | down | noncoding | 32      | ng      | 49348      | UGDH-AS1 | 2787 | 39596327:+ | 2303:HBL1;chr4:39609871:39642539:Panc1                |

|         |        |      |           |         |         |            |            |  |            |                                                         |
|---------|--------|------|-----------|---------|---------|------------|------------|--|------------|---------------------------------------------------------|
| ASHG19  |        |      |           |         |         |            |            |  |            |                                                         |
| SELNC2  |        |      |           | ENST00  |         |            |            |  | chr2:14756 |                                                         |
| A100642 |        |      |           | 0004507 | noncodi | ENSG000002 |            |  | 552-       | chr2:14760758:14777862:Fetal Intestine                  |
| 515     | 6.8218 | down | noncoding | 15      | ng      | 28505      | AC011897.2 |  | 346        | 14770316:+ Large;chr2:14760941:14776971:Fetal Intestine |

|         |        |    |           |         |            |       |         |            |                                                                                                                                                                                                                                                                                                                                                                                                                                                                                                                  |
|---------|--------|----|-----------|---------|------------|-------|---------|------------|------------------------------------------------------------------------------------------------------------------------------------------------------------------------------------------------------------------------------------------------------------------------------------------------------------------------------------------------------------------------------------------------------------------------------------------------------------------------------------------------------------------|
| ASHG19  |        |    |           |         |            |       |         |            | chr8:66619768:66757228:CD4p CD25- Il17-<br>PMAstim Th;chr8:66628792:66720654:Left<br>Ventricle;chr8:66647994:66675128:DHL6;chr8:6665<br>2449:66767909:CD20;chr8:66692709:66756320:CD<br>4p CD25- CD45RAp<br>Naive;chr8:66728768:66756039:CD4p CD25- Il17p<br>PMAstim Th17;chr8:66734112:66756365:CD8<br>primiary;chr8:66741431:66767174:Tonsil;chr8:66741<br>939:66767197:CD19<br>Primary;chr8:66742426:66755991:CD4 Memory<br>Primary<br>7pool;chr8:66748646:66755944:CD56;chr8:6674874<br>1:66755943:CD8 Naive |
| SELNC2  |        |    | ENST00    |         |            |       |         | chr8:66626 | 7pool;chr8:66749164:66755707:CD4 Naive Primary                                                                                                                                                                                                                                                                                                                                                                                                                                                                   |
| A100013 |        |    | 0006060   | noncodi | ENSG000002 | RP11- |         | 569-       | 7pool;chr8:66750712:66755519:CD34 Primary                                                                                                                                                                                                                                                                                                                                                                                                                                                                        |
| 917     | 2.4877 | up | noncoding | 67      | ng         | 72155 | 707M3.3 | 445        | 66627013:- RO01480                                                                                                                                                                                                                                                                                                                                                                                                                                                                                               |

|         |        |      |           |         |         |             |              |      |            |                                                            |
|---------|--------|------|-----------|---------|---------|-------------|--------------|------|------------|------------------------------------------------------------|
| ASHG19  |        |      |           |         |         |             |              |      |            | chr9:12771064:12819477:HMEC;chr9:12772303:12820220:Adipose |
| SELNC2  |        |      |           | ENST00  |         |             |              |      |            | Nuclei;chr9:12774422:12827133:Duodenum Smooth              |
| A100010 |        |      |           | 0004176 | noncodi | ENSG0000002 |              |      |            | chr9:12700 Muscle;chr9:12774601:12818766:NHEK;chr9:12774   |
| 536     | 7.752  | down | noncoding | 38      | ng      | 35448       | RP11-3L8.3   | 799  | 12814344:- | 741:12795687:HCC1954;chr9:12809247:12822241:Osteoblasts    |
| ASHG19  |        |      |           |         |         |             |              |      |            |                                                            |
| SELNC2  |        |      |           |         |         |             |              |      |            | chr16:7159                                                 |
| A101026 |        |      |           | NR_103  | noncodi | ENSG0000002 |              |      |            | 8919-                                                      |
| 948     | 5.2257 | up   | noncoding | 852     | ng      | 60886       | RP11-432I5.1 | Gold | 685        | 71606341:+ chr16:71605152:71608364:HepG2                   |

|         |        |    |           |         |            |       |          |          |     |            |                                                                                                                                                                                                                                                                                                                                                                                                                                                    |
|---------|--------|----|-----------|---------|------------|-------|----------|----------|-----|------------|----------------------------------------------------------------------------------------------------------------------------------------------------------------------------------------------------------------------------------------------------------------------------------------------------------------------------------------------------------------------------------------------------------------------------------------------------|
| ASHG19  |        |    |           |         |            |       |          |          |     |            | chr1:78412595:78447087:CD4p CD25- Il17-<br>PMastim Th;chr1:78440503:78446337:CD4p CD25-<br>Il17p PMastim Th17;chr1:78440827:78446362:CD8<br>primiary;chr1:78440854:78446748:CD4 Memory<br>Primary 7pool;chr1:78440981:78446554:CD34<br>Primary<br>RO01536;chr1:78440990:78472269:HMEC;chr1:784<br>41202:78446868:CD8 Memory<br>7pool;chr1:78442114:78446661:HeLa;chr1:78442308<br>:78446105:CD8 Naive<br>7pool;chr1:78468119:78474275:CD34 Primary |
| SELNC2  |        |    | ENST00    |         |            |       |          |          |     | chr1:78470 | RO01536;chr1:78468219:78474511:CD4 Memory                                                                                                                                                                                                                                                                                                                                                                                                          |
| A100007 |        |    | 0006086   | noncodi | ENSG000002 | RP11- |          |          |     | 030-       | Primary 7pool;chr1:78469587:78472772:CD34                                                                                                                                                                                                                                                                                                                                                                                                          |
| 736     | 3.8703 | up | noncoding | 84      | ng         | 73338 | 386114.4 | Reliable | 209 | 78470238:- | Primary RO01480                                                                                                                                                                                                                                                                                                                                                                                                                                    |

|         |        |    |           |         |            |       |            |          |     |                                 |
|---------|--------|----|-----------|---------|------------|-------|------------|----------|-----|---------------------------------|
| ASHG19  |        |    |           |         |            |       |            |          |     | chr2:23707                      |
| SELNC2  |        |    | ENST00    |         |            |       |            |          |     | 6090-                           |
| A100094 |        |    | 0004152   | noncodi | ENSG000002 |       |            |          |     | 237203570:                      |
| 949     | 2.2444 | up | noncoding | 26      | ng         | 33611 | AC079135.1 | Reliable | 552 | + chr2:237074529:237089707:HSMM |

|         |        |    |           |         |            |       |            |          |     |                                           |
|---------|--------|----|-----------|---------|------------|-------|------------|----------|-----|-------------------------------------------|
| ASHG19  |        |    |           |         |            |       |            |          |     | chr2:23707                                |
| SELNC2  |        |    | ENST00    |         |            |       |            |          |     | 6090-                                     |
| A100094 |        |    | 0004152   | noncodi | ENSG000002 |       |            |          |     | 237203570:                                |
| 949     | 2.2444 | up | noncoding | 26      | ng         | 33611 | AC079135.1 | Reliable | 552 | + chr2:237144830:237174927:Left Ventricle |

|         |        |    |           |         |         |            |           |     |   |                                                                                                                                                                                                  |
|---------|--------|----|-----------|---------|---------|------------|-----------|-----|---|--------------------------------------------------------------------------------------------------------------------------------------------------------------------------------------------------|
| ASHG19  |        |    |           |         |         |            |           |     |   | chr5:142136972:142262349:CD14;chr5:142148681:142267010:Left                                                                                                                                      |
| SELNC2  |        |    |           | ENST00  |         |            |           |     |   | Ventricle;chr5:142148743:142226830:Right                                                                                                                                                         |
| A100502 |        |    |           | 0004335 | noncodi | ENSG000002 | ARHGAP26- |     |   | Atrium;chr5:142148774:142205896:Duodenum                                                                                                                                                         |
| 053     | 3.0952 | up | noncoding | 95      | ng      | 26272      | AS1       | 978 | - | Smooth Muscle;chr5:142162913:142226368:Sigmoid Colon;chr5:142173878:142209873:Fetal Intestine Large;chr5:142176144:142254943:Gastric;chr5:14217195:142264107:Lung;chr5:142181959:142249748:Fetal |
|         |        |    |           |         |         |            |           |     |   | chr5:142239169-142248475: Muscle;chr5:142186071:142247539:Panc1;chr5:142186253:142215077:HepG2;chr5:142193268:142255285:Colon Crypt 1                                                            |

|         |        |    |           |         |         |            |          |               |           |                                  |
|---------|--------|----|-----------|---------|---------|------------|----------|---------------|-----------|----------------------------------|
| ASHG19  |        |    |           |         |         |            |          |               |           |                                  |
| SELNC2  |        |    |           | ENST00  |         |            |          |               |           | chr4:66891                       |
| A100010 |        |    |           | 0004995 | noncodi | ENSG000002 | RP11-    |               |           | 75- chr4:6675399:6698881:VACO    |
| 602     | 2.4179 | up | noncoding | 02      | ng      | 46526      | 539L10.2 | Reliable 1821 | 6692246:- | 503;chr4:6689586:6699251:Gastric |



|         |        |    |         |         |            |           |          |     |  |                                                          |
|---------|--------|----|---------|---------|------------|-----------|----------|-----|--|----------------------------------------------------------|
| ASHG19  |        |    |         |         |            |           |          |     |  | chr19:39810612:39864153:Tonsil;chr19:398252              |
| SELNC2  |        |    | ENST00  |         |            |           |          |     |  | 400;chr19:39810612:39864153:Tonsil;chr19:398252          |
| A100000 |        |    | 0005992 | noncodi | ENSG000002 | CTC-      |          |     |  | 31:39866492:Spleen;chr19:39835067:39864460:Brain         |
| 760     | 2.4793 | up | 74      | ng      | 69246      | 246B18.10 | Reliable | 173 |  | n Anterior Caudate;chr19:39835251:39864330:Brain         |
|         |        |    |         |         |            |           |          |     |  | Angular Gyrus;chr19:39835544:39871845:Brain              |
|         |        |    |         |         |            |           |          |     |  | Hippocampus Middle                                       |
|         |        |    |         |         |            |           |          |     |  | 150;chr19:39844385:39858405:Brain Cingulate              |
|         |        |    |         |         |            |           |          |     |  | Gyrus;chr19:39845143:39867711:Brain                      |
|         |        |    |         |         |            |           |          |     |  | Hippocampus                                              |
|         |        |    |         |         |            |           |          |     |  | Middle;chr19:39845385:39858315:Brain Inferior            |
|         |        |    |         |         |            |           |          |     |  | Temporal Lobe;chr19:39852821:39873874:Brain Mid          |
|         |        |    |         |         |            |           |          |     |  | Frontal                                                  |
|         |        |    |         |         |            |           |          |     |  | Lobe;chr19:39864576:39910331:Pancl;chr19:398873          |
|         |        |    |         |         |            |           |          |     |  | 53:39906237:CD20;chr19:39887382:39905568:CD4             |
|         |        |    |         |         |            |           |          |     |  | p CD25- CD45ROp                                          |
|         |        |    |         |         |            |           |          |     |  | Memory;chr19:39887413:39904333:CD14;chr19:398            |
|         |        |    |         |         |            |           |          |     |  | 87465:39905704:Skeletal                                  |
|         |        |    |         |         |            |           |          |     |  | Muscle;chr19:39887512:39904080:HCT-                      |
|         |        |    |         |         |            |           |          |     |  | 116;chr19:39887524:39905043:HeLa;chr19:3988754           |
|         |        |    |         |         |            |           |          |     |  | 9:39905712:CD8                                           |
|         |        |    |         |         |            |           |          |     |  | primiary;chr19:39887560:39906641:Brain                   |
|         |        |    |         |         |            |           |          |     |  | Hippocampus                                              |
|         |        |    |         |         |            |           |          |     |  | Middle;chr19:39887567:39905352:Psoas                     |
|         |        |    |         |         |            |           |          |     |  | Muscle;chr19:39887574:39925278:Esophagus;chr19:          |
|         |        |    |         |         |            |           |          |     |  | 39887582:39905820:CD4p CD25- Il17- PMAstim               |
|         |        |    |         |         |            |           |          |     |  | Th;chr19:39887592:39902772:Colon Crypt                   |
|         |        |    |         |         |            |           |          |     |  | 1;chr19:39887595:39905740:Small                          |
|         |        |    |         |         |            |           |          |     |  | Intestine;chr19:39887598:39922292:Sigmoid                |
|         |        |    |         |         |            |           |          |     |  | 2413- Colon;chr19:39887615:39906154:Gastric;chr19:3988   |
|         |        |    |         |         |            |           |          |     |  | 39832585:- 7623:39905090:CD56;chr19:39887631:39906190:Ri |

|         |        |    |           |    |    |       |            |            |                      |                                                   |
|---------|--------|----|-----------|----|----|-------|------------|------------|----------------------|---------------------------------------------------|
| ASHG19  |        |    |           |    |    |       |            |            | chr3:10768           |                                                   |
| SELNC2  |        |    |           |    |    |       |            |            | 4183-                |                                                   |
| A100939 |        |    |           |    |    |       |            |            | 107706188:           |                                                   |
| 874     | 2.0642 | up | noncoding | 44 | ng | 65539 | CATG000000 | CATG000000 | 6361                 | -                                                 |
|         |        |    |           |    |    |       |            |            |                      | chr3:107687913:107726304:HCC1954                  |
|         |        |    |           |    |    |       |            |            |                      | chr6:24689956:24723154:Adipose                    |
|         |        |    |           |    |    |       |            |            |                      | Nuclei;chr6:24699483:24722977:CD4p CD25- Il17-    |
|         |        |    |           |    |    |       |            |            |                      | PMastim Th;chr6:24704475:24722601:CD34            |
|         |        |    |           |    |    |       |            |            |                      | Primary RO01536;chr6:24716200:24722741:CD4        |
|         |        |    |           |    |    |       |            |            |                      | Memory Primary                                    |
|         |        |    |           |    |    |       |            |            |                      | 7pool;chr6:24717070:24722878:CD8                  |
|         |        |    |           |    |    |       |            |            |                      | primiary;chr6:24717126:24722883:Tonsil;chr6:24717 |
|         |        |    |           |    |    |       |            |            |                      | 401:24722848:CD8 Memory                           |
|         |        |    |           |    |    |       |            |            |                      | 7pool;chr6:24717427:24722705:CD4p CD25- Il17p     |
|         |        |    |           |    |    |       |            |            |                      | PMastim Th17;chr6:24717823:24723068:CD8           |
|         |        |    |           |    |    |       |            |            |                      | Naive                                             |
|         |        |    |           |    |    |       |            |            |                      | 8pool;chr6:24717939:24722652:NHEK;chr6:2471797    |
|         |        |    |           |    |    |       |            |            |                      | 5:24722681:CD4p CD225int CD127p                   |
|         |        |    |           |    |    |       |            |            |                      | Tmem;chr6:24717984:24722785:CD4 Memory            |
|         |        |    |           |    |    |       |            |            |                      | Primary 8pool;chr6:24718102:24722633:CD4 Naive    |
|         |        |    |           |    |    |       |            |            |                      | Primary 8pool;chr6:24718104:24722804:Fetal        |
|         |        |    |           |    |    |       |            |            |                      | Muscle;chr6:24718107:24722890:CD8 Naive           |
|         |        |    |           |    |    |       |            |            |                      | 7pool;chr6:24718189:24722854:CD56;chr6:2471840    |
|         |        |    |           |    |    |       |            |            |                      | 3:24722902:Spleen;chr6:24718471:24722666:K562;c   |
|         |        |    |           |    |    |       |            |            |                      | hr6:24718524:24722844:CD3;chr6:24718676:247227    |
| ASHG19  |        |    |           |    |    |       |            |            | chr6:24706           |                                                   |
| SELNC2  |        |    |           |    |    |       |            |            | 61:CD4 Naive Primary |                                                   |
| A100008 |        |    |           |    |    |       |            |            | 975-                 |                                                   |
| 481     | 2.0731 | up | noncoding | 21 | ng | 72402 | ENSG000002 | RP1-30M3.6 | Reliable             | 405                                               |
|         |        |    |           |    |    |       |            |            |                      | 24707379:+                                        |
|         |        |    |           |    |    |       |            |            |                      | 7pool;chr6:24719459:24722374:CD34 Primary         |
|         |        |    |           |    |    |       |            |            |                      | RO01480;chr6:24719529:24722288:Colon Crypt 2      |

|         |        |    |           |         |         |            |          |     |            |                                                |  |
|---------|--------|----|-----------|---------|---------|------------|----------|-----|------------|------------------------------------------------|--|
| ASHG19  |        |    |           |         |         |            |          |     |            |                                                |  |
| SELNC2  |        |    |           | ENST00  |         |            |          |     | chr5:82837 | chr5:82762834:82772725:Fetal                   |  |
| A100470 |        |    |           | 0005138 | noncodi | ENSG000002 |          |     | 296-       | Muscle;chr5:82766088:82838695:CD14;chr5:827667 |  |
| 650     | 2.3071 | up | noncoding | 99      | ng      | 49835      | VCAN-AS1 | 453 | 82877139:- | 91:82772748:Astrocytes                         |  |

|         |        |    |           |         |            |       |          |          |     |                                                 |
|---------|--------|----|-----------|---------|------------|-------|----------|----------|-----|-------------------------------------------------|
| ASHG19  |        |    |           |         |            |       |          |          |     | chr3:148988789:149126506:Panc1;chr3:149048300:1 |
| SELNC2  |        |    | ENST00    |         |            |       |          |          |     | 49061677:HUVEC;chr3:149049808:149071618:u87;    |
| A100002 |        |    | 0004890   | noncodi | ENSG000002 | RP11- |          |          |     | chr3:149056853:149120867:HeLa;chr3:149057580:1  |
| 935     | 3.3541 | up | noncoding | 11      | ng         | 44468 | 206M11.7 | Reliable | 551 | 49127143:Gastric;chr3:149073140:149120176:Fetal |
|         |        |    |           |         |            |       |          |          |     | Intestine;chr3:149083029:149109672:HMEC;chr3:14 |
|         |        |    |           |         |            |       |          |          |     | 9083318:149107100:NHEK;chr3:149084101:149120    |
|         |        |    |           |         |            |       |          |          |     | chr3:14900                                      |
|         |        |    |           |         |            |       |          |          |     | 838:HUVEC;chr3:149084137:149120740:Osteoblasts  |
|         |        |    |           |         |            |       |          |          |     | 2569-                                           |
|         |        |    |           |         |            |       |          |          |     | ;chr3:149084285:149120708:HCC1954;chr3:149084   |
|         |        |    |           |         |            |       |          |          |     | 149051440:                                      |
|         |        |    |           |         |            |       |          |          |     | 395:149120202:Esophagus;chr3:149084790:1491094  |
|         |        |    |           |         |            |       |          |          |     | +                                               |
|         |        |    |           |         |            |       |          |          |     | 22:Astrocytes;chr3:149087973:149107095:NHLF     |

|         |        |    |           |         |            |         |     |  |  |  |                                                                                 |
|---------|--------|----|-----------|---------|------------|---------|-----|--|--|--|---------------------------------------------------------------------------------|
| ASHG19  |        |    |           |         |            |         |     |  |  |  | chr3:50238550:50280758:Pancreas;chr3:50244858:50314281:Brain Hippocampus Middle |
| SELNC2  |        |    | ENST00    |         |            |         |     |  |  |  | 150;chr3:50245058:50313116:Brain Anterior                                       |
| A100006 |        |    | 0004217   | noncodi | ENSG000002 | SEMA3B- |     |  |  |  | Caudate;chr3:50247084:50313376:Brain Cingulate                                  |
| 614     | 3.2328 | up | noncoding | 35      | ng         | 32352   | AS1 |  |  |  | Gyrus;chr3:50247150:50313735:Brain Hippocampus                                  |
|         |        |    |           |         |            |         |     |  |  |  | Middle;chr3:50248043:50313227:Brain Inferior                                    |
|         |        |    |           |         |            |         |     |  |  |  | Temporal Lobe;chr3:50263296:50298495:CD4p                                       |
|         |        |    |           |         |            |         |     |  |  |  | CD25- CD45ROp                                                                   |
|         |        |    |           |         |            |         |     |  |  |  | Memory;chr3:50263305:50298785:Tonsil;chr3:50263                                 |
|         |        |    |           |         |            |         |     |  |  |  | 386:50311338:HCT-                                                               |
|         |        |    |           |         |            |         |     |  |  |  | 116;chr3:50263388:50298592:CD4p CD25-                                           |
|         |        |    |           |         |            |         |     |  |  |  | CD45RAp Naive;chr3:50263790:50311735:Brain                                      |
|         |        |    |           |         |            |         |     |  |  |  | Mid Frontal Lobe;chr3:50263891:50292642:CD4p                                    |
|         |        |    |           |         |            |         |     |  |  |  | CD25- Il17- PMAstim                                                             |
|         |        |    |           |         |            |         |     |  |  |  | Th;chr3:50263947:50299068:HUVEC;chr3:50264154                                   |
|         |        |    |           |         |            |         |     |  |  |  | :50298414:CD8                                                                   |
|         |        |    |           |         |            |         |     |  |  |  | primiary;chr3:50264158:50296642:CD14;chr3:50264                                 |
|         |        |    |           |         |            |         |     |  |  |  | 182:50298159:CD4p CD25- Il17p PMAstim                                           |
|         |        |    |           |         |            |         |     |  |  |  | Th17;chr3:50264192:50307591:Spleen;chr3:5026419                                 |
|         |        |    |           |         |            |         |     |  |  |  | 9:50309396:Lung;chr3:50264225:50309632:Small                                    |
|         |        |    |           |         |            |         |     |  |  |  | Intestine;chr3:50264235:50308232:Left                                           |
|         |        |    |           |         |            |         |     |  |  |  | Ventricle;chr3:50264239:50309560:Sigmoid                                        |
|         |        |    |           |         |            |         |     |  |  |  | Colon;chr3:50264241:50312025:Gastric;chr3:502642                                |
|         |        |    |           |         |            |         |     |  |  |  | 44:50307456:Psoas                                                               |
|         |        |    |           |         |            |         |     |  |  |  | Muscle;chr3:50264249:50311529:Colon Crypt                                       |
|         |        |    |           |         |            |         |     |  |  |  | 3;chr3:50264266:50311141:Esophagus;chr3:5026426                                 |
|         |        |    |           |         |            |         |     |  |  |  | 7:50311261:Colon Crypt                                                          |
|         |        |    |           |         |            |         |     |  |  |  | chr3:50304                                                                      |
|         |        |    |           |         |            |         |     |  |  |  | 1;chr3:50264277:50311114:Colon Crypt                                            |
|         |        |    |           |         |            |         |     |  |  |  | 073-                                                                            |
|         |        |    |           |         |            |         |     |  |  |  | 2;chr3:50264284:50307169:NHLF;chr3:50264303:50                                  |
|         |        |    |           |         |            |         |     |  |  |  | 50304803:-                                                                      |
|         |        |    |           |         |            |         |     |  |  |  | 308693:Aorta;chr3:50264311:50312803:Brain                                       |

|         |        |      |           |         |         |            |            |          |      |                                                                                                                                                                                                                                                                                                                                                                                                                                                                                                                                                                                                                                                                                                                                                                                                                                                                                                                 |
|---------|--------|------|-----------|---------|---------|------------|------------|----------|------|-----------------------------------------------------------------------------------------------------------------------------------------------------------------------------------------------------------------------------------------------------------------------------------------------------------------------------------------------------------------------------------------------------------------------------------------------------------------------------------------------------------------------------------------------------------------------------------------------------------------------------------------------------------------------------------------------------------------------------------------------------------------------------------------------------------------------------------------------------------------------------------------------------------------|
| ASHG19  |        |      |           |         |         |            |            |          |      | chr19:709079:728211:Ovary;chr19:727253:756891:Small Intestine;chr19:733218:756380:Colon Crypt 1;chr19:733267:757655:Colon Crypt 3;chr19:736895:756837:Fetal Intestine;chr19:736989:756634:Fetal Intestine Large;chr19:737545:755701:Colon Crypt 2;chr19:738309:757171:Sigmoid Colon;chr19:747547:756341:VACO 503;chr19:750343:797668:HSMMtube;chr19:772741:807650:Pancreatic islets;chr19:778437:802014:HeLa;chr19:778786:803779:Lung;chr19:778823:804693:Spleen;chr19:781851:802859:Adrenal Gland;chr19:781861:803389:Pancreas;chr19:788577:801770:K562;chr19:797352:807489:LNCaP chr8:28822411:28925363:CD20;chr8:28881051:28923940:CD19 Primary;chr8:28882012:28920814:CD8 primary;chr8:28906874:28920394:CD4 Naive Primary 8pool;chr8:28910053:28934648:Brain Hippocampus Middle;chr8:28910933:28944469:HSMMtube;chr8:28911550:28937410:Brain Cingulate Gyrus;chr8:28911572:28937342:Brain Anterior Caudate |
| SELNC2  |        |      |           | ENST00  |         |            |            |          |      | chr19:7866                                                                                                                                                                                                                                                                                                                                                                                                                                                                                                                                                                                                                                                                                                                                                                                                                                                                                                      |
| A100003 |        |      |           | 0005919 | noncodi | ENSG000002 |            |          |      | 50-                                                                                                                                                                                                                                                                                                                                                                                                                                                                                                                                                                                                                                                                                                                                                                                                                                                                                                             |
| 964     | 2.2787 | up   | noncoding | 18      | ng      | 66927      | AC006273.7 | Reliable | 388  | 787037:+                                                                                                                                                                                                                                                                                                                                                                                                                                                                                                                                                                                                                                                                                                                                                                                                                                                                                                        |
| ASHG19  |        |      |           |         |         |            |            |          |      | chr8:28924                                                                                                                                                                                                                                                                                                                                                                                                                                                                                                                                                                                                                                                                                                                                                                                                                                                                                                      |
| SELNC2  |        |      |           | ENST00  |         |            |            |          |      | 796-                                                                                                                                                                                                                                                                                                                                                                                                                                                                                                                                                                                                                                                                                                                                                                                                                                                                                                            |
| A100015 |        |      |           | 0005607 | noncodi | ENSG000002 | CTD-       |          |      | 28925971:+                                                                                                                                                                                                                                                                                                                                                                                                                                                                                                                                                                                                                                                                                                                                                                                                                                                                                                      |
| 321     | 2.0628 | down | noncoding | 14      | ng      | 59607      | 2647L4.5   | Reliable | 585  |                                                                                                                                                                                                                                                                                                                                                                                                                                                                                                                                                                                                                                                                                                                                                                                                                                                                                                                 |
| ASHG19  |        |      |           |         |         |            |            |          |      | chr5:14661                                                                                                                                                                                                                                                                                                                                                                                                                                                                                                                                                                                                                                                                                                                                                                                                                                                                                                      |
| SELNC2  |        |      |           | ENST00  |         |            |            |          |      | 917-                                                                                                                                                                                                                                                                                                                                                                                                                                                                                                                                                                                                                                                                                                                                                                                                                                                                                                            |
| A100706 |        |      |           | 0005631 | noncodi | ENSG000002 | CTD-       |          |      | chr5:14659774:14688245:HMEC;chr5:14662875:146                                                                                                                                                                                                                                                                                                                                                                                                                                                                                                                                                                                                                                                                                                                                                                                                                                                                   |
| 943     | 3.2141 | up   | noncoding | 01      | ng      | 61360      | 2165H16.4  | Reliable | 2797 | 14664713:- 78963:Tonsil                                                                                                                                                                                                                                                                                                                                                                                                                                                                                                                                                                                                                                                                                                                                                                                                                                                                                         |

|         |        |      |           |         |         |            |            |              |                                                            |
|---------|--------|------|-----------|---------|---------|------------|------------|--------------|------------------------------------------------------------|
| ASHG19  |        |      |           |         |         |            |            |              | chr8:10411                                                 |
| SELNC2  |        |      |           | ENCT00  |         |            |            |              | 4413-                                                      |
| A100000 |        |      |           | 0004389 | noncodi | CATG000001 | CATG000001 |              | 104117614: chr8:104115978:104156783:u87;chr8:104143338:104 |
| 110     | 4.8905 | down | noncoding | 09      | ng      | 03488      | 03488.1    | 2127         | - 159540:Brain Inferior Temporal Lobe                      |
|         |        |      |           |         |         |            |            |              | chr1:1058966:1101877:Small                                 |
|         |        |      |           |         |         |            |            |              | Intestine;chr1:1059412:1101686:Fetal Intestine             |
|         |        |      |           |         |         |            |            |              | Large;chr1:1059633:1101903:Fetal                           |
|         |        |      |           |         |         |            |            |              | Intestine;chr1:1059682:1101913:VACO                        |
|         |        |      |           |         |         |            |            |              | 400;chr1:1067578:1102178:LNcaP;chr1:1068186:11             |
|         |        |      |           |         |         |            |            |              | 01896:Esophagus;chr1:1069414:1073756:Colon                 |
|         |        |      |           |         |         |            |            |              | Crypt 3;chr1:1069443:1073717:Colon Crypt                   |
|         |        |      |           |         |         |            |            |              | 2;chr1:1070790:1094387:CD19                                |
|         |        |      |           |         |         |            |            |              | Primary;chr1:1071352:1103985:VACO                          |
|         |        |      |           |         |         |            |            |              | 9m;chr1:1077814:1082618:Colon Crypt                        |
|         |        |      |           |         |         |            |            |              | 3;chr1:1077845:1081465:Colon Crypt                         |
|         |        |      |           |         |         |            |            |              | 2;chr1:1079431:1101911:HCT-                                |
|         |        |      |           |         |         |            |            |              | 116;chr1:1090819:1107666:Gastric;chr1:1092804:11           |
|         |        |      |           |         |         |            |            |              | 07737:Colon Crypt                                          |
|         |        |      |           |         |         |            |            |              | 3;chr1:1092807:1104591:Sigmoid                             |
|         |        |      |           |         |         |            |            |              | Colon;chr1:1092822:1104598:Colon Crypt                     |
| ASHG19  |        |      |           | ENST00  |         |            |            |              | chr1:11047                                                 |
| SELNC2  |        |      |           | 0006069 | noncodi | ENSG000002 | RP11-      |              | 2;chr1:1092849:1101754:Pancreas;chr1:1096780:110           |
| A100018 |        |      |           | 0006069 | noncodi | ENSG000002 | RP11-      |              | 37- 5079:Pancreatic islets;chr1:1097418:1104038:VACO       |
| 955     | 9.1528 | up   | noncoding | 93      | ng      | 72141      | 465B22.8   | Reliable 987 | 1105723:+ 503                                              |

ASHG19  
 SELNC2  
 A100003  
 564 2.0103 down noncoding 75 ng 28108 AC092839.3 Gold 536

ENST00  
 0004334 noncodi ENSG000002

chr2:54743  
 185-  
 54767834:-

chr2:54782901:54866655:CD20;chr2:5478  
 3432:54831458:RPMI-  
 8402;chr2:54783537:54830613:CD8

chr2:54586696:54663525:Fetal  
 Nuclei;chr2:54613104:54672107:Lung;chr2:5461757  
 1:54687691:Ly4;chr2:54636091:54712312:HSMMtu  
 be;chr2:54683758:54711159:Fetal  
 Muscle;chr2:54685473:54869675:Lung;chr2:5474595  
 8:54901405:Brain Inferior Temporal  
 Lobe;chr2:54749764:54818736:Toledo;chr2:5475008  
 8:54804603:HMEC;chr2:54750817:54816774:VACO  
 400;chr2:54751343:54804439:NHEK;chr2:54751452:  
 54803224:VACO  
 503;chr2:54756686:54833095:Fetal Intestine  
 Large;chr2:54758268:54832822:Fetal  
 Intestine;chr2:54759619:54832571:Sigmoid  
 Colon;chr2:54759741:54827867:Colon Crypt  
 3;chr2:54760045:54869686:Small  
 Intestine;chr2:54760046:54846250:Colon Crypt  
 1;chr2:54761748:54831451:Colon Crypt  
 2;chr2:54772221:54842605:HUVEC;chr2:54772315:  
 54847136:Duodenum Smooth  
 Muscle;chr2:54772625:54869602:Gastric;chr2:54772  
 694:54902160:Left  
 Ventricle;chr2:54776502:54867867:Brain Anterior  
 Caudate;chr2:54776871:54807844:MM1S;chr2:5477  
 7478:54832779:Fetal  
 Thymus;chr2:54777855:54816759:Pancreas;chr2:547  
 81785:54902053:Spleen;chr2:54782397:54814377:O



|         |        |      |           |         |         |            |         |          |     |   |                                |
|---------|--------|------|-----------|---------|---------|------------|---------|----------|-----|---|--------------------------------|
| ASHG19  |        |      |           |         |         |            |         |          |     |   | chr1:15445                     |
| SELNC2  |        |      |           | ENST00  |         |            |         |          |     |   | 2488-                          |
| A100000 |        |      |           | 0006079 | noncodi | ENSG000002 | RP11-   |          |     |   | 154453977:                     |
| 793     | 2.3844 | down | noncoding | 63      | ng      | 73110      | 350G8.9 | Reliable | 681 | + | chr1:154452194:154475601:HUVEC |

|         |        |      |           |         |         |            |          |  |     |  |            |
|---------|--------|------|-----------|---------|---------|------------|----------|--|-----|--|------------|
| ASHG19  |        |      |           |         |         |            |          |  |     |  | chr5:38559 |
| SUPERL  |        |      |           | ENST00  |         |            |          |  |     |  | 044-       |
| NC2A10  |        |      |           | 0005142 | noncodi | ENSG000002 |          |  |     |  | 38579696;+ |
| 0089200 | 3.0383 | down | noncoding | 91      | ng      | 44968      | LIFR-AS1 |  | 685 |  |            |

|         |        |    |           |    |    |       |          |     |   |                                                                                                                                                                                                                                                                                                                                                                                                                                                                     |
|---------|--------|----|-----------|----|----|-------|----------|-----|---|---------------------------------------------------------------------------------------------------------------------------------------------------------------------------------------------------------------------------------------------------------------------------------------------------------------------------------------------------------------------------------------------------------------------------------------------------------------------|
| ASHG19  |        |    |           |    |    |       |          |     |   | chr10:112071042:112117651:u87;chr10:112100132:112156157:HBL1;chr10:112112550:112125490:CD4p CD25- Il17p PMAstim                                                                                                                                                                                                                                                                                                                                                     |
| SELNC2  |        |    |           |    |    |       |          |     |   | Th17;chr10:112112730:112119838:MM1S;chr10:112115390:112125208:VACO                                                                                                                                                                                                                                                                                                                                                                                                  |
| A100709 |        |    |           |    |    |       |          |     |   | 9m;chr10:112135153:112176146:HUVEC;chr10:112146730:112185396:MM1S;chr10:112151756:112192739:HeLa;chr10:112152000:112171940:NHDF-Ad;chr10:112152059:112222295:Pancreatic islets;chr10:112152061:112187511:Osteoblasts;chr10:112152533:112189395:u87;chr10:112152627:112187468:NHLF;chr10:112153022:112177947:VACO503;chr10:112153838:112221461:HCT-116;chr10:112154632:112176414:Fetal Intestine Large;chr10:112154864:112180852:HMEC;chr10:112155104:112175446:VACO |
| 371     | 2.0302 | up | noncoding | 14 | ng | 73143 | 525A16.4 | 488 | - | 88598-9m;chr10:112157290:112180905:NHEK;chr10:11216112255945:6871:112184396:Ly4;chr10:112201172:112226248:MM1S                                                                                                                                                                                                                                                                                                                                                      |
| ASHG19  |        |    |           |    |    |       |          |     |   | chr10:112246051:112272983:HeLa;chr10:112246915:112297015:Osteoblasts;chr10:112247147:112290867:HUVEC;chr10:112247329:112307154:u87;chr10:112247411:112273365:Astrocytes;chr10:112252889:112273435:HMEC;chr10:112255287:112274294:NHDF-Ad;chr10:112255287:112274309:CD4p CD25- Il17- PMAstim                                                                                                                                                                         |
| SELNC2  |        |    |           |    |    |       |          |     |   | Th;chr10:112255339:112274190:CD4p CD25- Il17p PMAstim                                                                                                                                                                                                                                                                                                                                                                                                               |
| A100709 |        |    |           |    |    |       |          |     |   | Th17;chr10:112255360:112273473:NHLF;chr10:112255365:112296656:HCT-                                                                                                                                                                                                                                                                                                                                                                                                  |
| 371     | 2.0302 | up | noncoding | 14 | ng | 73143 | 525A16.4 | 488 | - | chr10:1121116;chr10:112255396:112273284:Lung;chr10:1122588598-5397:112273453:Left Ventricle;chr10:112255470:112261226:VACO9m;chr10:112255651:112270145:Right Atrium                                                                                                                                                                                                                                                                                                 |

ASHG19  
SELNC2  
A100009  
680 2.0522 up

noncoding  
14

ENST00  
0004412 noncodi  
ng 33077  
ENSG000002 RP11-  
290F20.2

2250

chr20:4892  
503;chr20:48803479:48814402:K562;chr20:4880363  
7248-  
3:48810228:VACO  
48937879:-  
400;chr20:48805257:48814437:Lung;chr20:4880560

chr20:48701859:48789905:Duodenum Smooth  
Muscle;chr20:48702033:48738142:Ly4;chr20:487021  
24:48789661:Esophagus;chr20:48703584:48751057:  
Stomach Smooth  
Muscle;chr20:48713682:48790155:Skeletal  
Muscle;chr20:48715646:48789981:Psoas  
Muscle;chr20:48717052:48789891:Adipose  
Nuclei;chr20:48717422:48789836:Panc1;chr20:48718  
262:48789766:Small  
Intestine;chr20:48720232:48789657:Gastric;chr20:48  
724294:48730728:CD4p CD25- Il17p PMAstim  
Th17;chr20:48726272:48789783:Sigmoid  
Colon;chr20:48726275:48764260:Brain Inferior  
Temporal Lobe;chr20:48726309:48789939:Brain  
Hippocampus  
Middle;chr20:48726442:48767435:Brain Cingulate  
Gyrus;chr20:48726661:48783250:NHEK;chr20:4872  
7637:48764201:Adrenal  
Gland;chr20:48737236:48789971:Brain Anterior  
Caudate;chr20:48737524:48768213:LNCaP;chr20:48  
746278:48789944:Lung;chr20:48746381:48783848:  
K562;chr20:48753218:48783657:CD14;chr20:48753  
257:48789903:HMEC;chr20:48754340:48789912:H  
UVEC;chr20:48768265:48783648:HepG2;chr20:4878  
1955:48812547:Adrenal  
Gland;chr20:48802930:48844173:Adipose  
Nuclei;chr20:48802979:48811786:VACO

|         |        |      |           |         |         |            |             |              |   |                                                                                                                                                                                                                                                                                                                                                                                                                                                                                                                                                                                                                                                                                                                                                                                                                                                                                                                                                                                                                                                                                                                                                                                                                                             |
|---------|--------|------|-----------|---------|---------|------------|-------------|--------------|---|---------------------------------------------------------------------------------------------------------------------------------------------------------------------------------------------------------------------------------------------------------------------------------------------------------------------------------------------------------------------------------------------------------------------------------------------------------------------------------------------------------------------------------------------------------------------------------------------------------------------------------------------------------------------------------------------------------------------------------------------------------------------------------------------------------------------------------------------------------------------------------------------------------------------------------------------------------------------------------------------------------------------------------------------------------------------------------------------------------------------------------------------------------------------------------------------------------------------------------------------|
| ASHG19  |        |      |           |         |         |            |             |              |   | chr5:148819120:148819120;K502;chr5:148819209:148881410:Panc1;chr5:148819274:148868596:Colon Crypt 1;chr5:148819404:148867311:Sigmoid Colon;chr5:148819616:148866925:Colon Crypt 2;chr5:148821819:148834385:Stomach Smooth Muscle;chr5:148824432:148845358:IMR90;chr5:148824720:148847073:HSMMtube;chr5:148853356:148869916:HMEC;chr5:148853560:148870207:NHEK;chr5:148853650:148877537:HCC1954;chr5:148860541:148943578:Adipose Nuclei;chr5:148860971:148879463:NHDF-Ad;chr5:148863775:148897937:NHLF;chr5:148864014:148944758:Osteoblasts;chr5:148864055:148882587:HSMMtube;chr5:148893794:148943640:CD4p CD25- II17- PMAstim Th;chr5:148897743:148932547:CD34 Primary RO01536;chr5:148922338:148943852:Duodenum Smooth Muscle;chr5:148922454:148943762:Fetal Intestine;chr5:148922503:148944671:HUVEC;chr5:148923119:148943190:Spleen;chr5:148923133:148932151:CD34 Primary RO01549;chr5:148923224:148946097:Esophagus;chr5:148924664:149021152:Gastric;chr5:148926288:148944800:NHEK;chr5:148928214:148941668:CD4 Memory Primary 7pool;chr5:148928230:148944907:HMEC;chr5:148928279:148944100:NHDF-Ad;chr5:148928323:148932047:CD34 Primary RO01480;chr5:148928371:148943685:NHLF;chr5:148928400:148943524:Astrocytes;chr5:148928411:148 |
| SUPERL  |        |      |           | ENST00  |         |            |             |              |   | chr5:148873877-                                                                                                                                                                                                                                                                                                                                                                                                                                                                                                                                                                                                                                                                                                                                                                                                                                                                                                                                                                                                                                                                                                                                                                                                                             |
| NC2A10  |        |      |           | 0004995 | noncodi | ENSG000002 |             |              |   | 148884233:                                                                                                                                                                                                                                                                                                                                                                                                                                                                                                                                                                                                                                                                                                                                                                                                                                                                                                                                                                                                                                                                                                                                                                                                                                  |
| 0038277 | 2.1744 | down | noncoding | 21      | ng      | 30551      | CTB-89H12.4 | 8636         | - | 8928400:148943524:Astrocytes;chr5:148928411:148                                                                                                                                                                                                                                                                                                                                                                                                                                                                                                                                                                                                                                                                                                                                                                                                                                                                                                                                                                                                                                                                                                                                                                                             |
| ASHG19  |        |      |           |         |         |            |             |              |   | chr9:115647438-                                                                                                                                                                                                                                                                                                                                                                                                                                                                                                                                                                                                                                                                                                                                                                                                                                                                                                                                                                                                                                                                                                                                                                                                                             |
| SELNC2  |        |      |           | ENST00  |         |            |             |              |   | 115648047:                                                                                                                                                                                                                                                                                                                                                                                                                                                                                                                                                                                                                                                                                                                                                                                                                                                                                                                                                                                                                                                                                                                                                                                                                                  |
| A100014 |        |      |           | 0006054 | noncodi | ENSG000002 | RP11-       |              |   |                                                                                                                                                                                                                                                                                                                                                                                                                                                                                                                                                                                                                                                                                                                                                                                                                                                                                                                                                                                                                                                                                                                                                                                                                                             |
| 649     | 2.4955 | up   | noncoding | 80      | ng      | 71631      | 408O19.5    | Reliable 610 | + | chr9:115593194:115665674:CD14                                                                                                                                                                                                                                                                                                                                                                                                                                                                                                                                                                                                                                                                                                                                                                                                                                                                                                                                                                                                                                                                                                                                                                                                               |

|         |        |    |           |         |         |            |              |          |      |            |                                                  |           |
|---------|--------|----|-----------|---------|---------|------------|--------------|----------|------|------------|--------------------------------------------------|-----------|
| ASHG19  |        |    |           |         |         |            |              |          |      |            |                                                  |           |
| SELNC2  |        |    |           | ENST00  |         |            |              |          |      | chr22:4289 | chr22:42878327:42932916:Brain                    | Cingulate |
| A100126 |        |    |           | 0003599 | noncodi | ENSG000001 |              |          |      | 6596-      | Gyrus;chr22:42896102:42933228:Brain              |           |
| 370     | 3.6335 | up | noncoding | 06      | ng      | 72250      | SERHL        |          | 1346 | 42908566:+ | Hippocampus                                      | Middle    |
| ASHG19  |        |    |           |         |         |            |              |          |      |            |                                                  |           |
| SELNC2  |        |    |           | ENST00  |         |            |              |          |      | chr5:10051 |                                                  |           |
| A100016 |        |    |           | 0006065 | noncodi | ENSG000002 |              |          |      | 54-        | chr5:943372:968917:Toledo;chr5:955704:998713:Jur |           |
| 212     | 2.0868 | up | noncoding | 40      | ng      | 72347      | RP11-43F13.4 | Reliable | 1585 | 1006738:+  | kat;chr5:989435:1013448:Toledo                   |           |

|         |        |      |           |         |         |            |            |      |            |                                                                                          |
|---------|--------|------|-----------|---------|---------|------------|------------|------|------------|------------------------------------------------------------------------------------------|
| ASHG19  |        |      |           |         |         |            |            |      |            | chr11:43925695:43966804:Duodenum Smooth Muscle;chr11:43926240:43969863:Small             |
| SELNC2  |        |      |           | ENST00  |         |            |            |      |            | chr11:4393                                                                               |
| A100652 |        |      |           | 0004991 | noncodi | ENSG000002 |            |      |            | Intestine;chr11:43926449:43969198:Ovary;chr11:439                                        |
| 033     | 2.2052 | down | noncoding | 94      | ng      | 44926      | ALKBH3-AS1 | 1906 | 43942476:- | 28048:43945475:MM1S;chr11:43937958:43969840: Sigmoid Colon;chr11:43941179:43971019:Aorta |

|         |        |      |           |         |         |            |           |      |            |                                                                   |
|---------|--------|------|-----------|---------|---------|------------|-----------|------|------------|-------------------------------------------------------------------|
| ASHG19  |        |      |           |         |         |            |           |      |            | chr17:49412404:49452376:Brain Hippocampus                         |
| SELNC2  |        |      |           | ENST00  |         |            |           |      |            | chr17:4941                                                        |
| A100015 |        |      |           | 0004418 | noncodi | ENSG000002 | RP11-     |      |            | Middle 150;chr17:49412535:49452208:Brain Inferior                 |
| 739     | 4.4629 | down | noncoding | 95      | ng      | 25860      | 1018N14.2 | 2645 | 49419932:+ | 4076- Temporal Lobe;chr17:49412663:49451710:Brain Cingulate Gyrus |



ASHG19  
 SELNC2  
 A100018  
 110 2.6312 up noncoding 76 ng 30730 AC074011.2 Reliable 581

ENST00  
 0004313 noncodi ENSG000002

chr2:28856  
 148-  
 28887406:-

chr2:28789783:28801038:Rsoas  
 Muscle;chr2:28804678:28866634:Pancreatic  
 islets;chr2:28805268:28860190:Skeletal  
 Muscle;chr2:28806133:28848582:HeLa;chr2:2880619  
 3:28863417:CD14;chr2:28806196:28868492:Left  
 Ventricle;chr2:28806225:28861087:Lung;chr2:28806  
 226:28868492:Right  
 Atrium;chr2:28806276:28890142:Esophagus;chr2:28  
 806330:28888847:Sigmoid  
 Colon;chr2:28806480:28907005:Aorta;chr2:2880664  
 2:28907013:Small  
 Intestine;chr2:28806722:28906994:Stomach Smooth  
 Muscle;chr2:28806770:28889182:Duodenum Smooth  
 Muscle;chr2:28825474:28849071:CD34 Primary  
 RO01536;chr2:28832761:28873406:HMEC;chr2:288  
 33216:28888249:Colon Crypt  
 1;chr2:28835613:28850390:CD4p CD25- CD45ROp  
 Memory;chr2:28835773:28849201:CD4 Memory  
 Primary 7pool;chr2:28835860:28848887:CD4p  
 CD225int CD127p  
 Tmem;chr2:28835937:28848980:CD3;chr2:28835981  
 :28848233:CD4 Naive Primary  
 7pool;chr2:28837043:28886251:VACO  
 9m;chr2:28843165:28898259:Gastric;chr2:28843336:  
 28888581:Ovary;chr2:28843402:28889028:Fetal  
 Intestine;chr2:28843662:28916085:HSMMtube;chr2:  
 28862226:28887508:HeLa;chr2:28865636:28889058:  
 Fetal Intestine Large;chr2:28883962:28976455:Left  
 Ventricle;chr2:28939958:28981783:Aorta;chr2:28970  
 154:28976795:CD4p CD25- CD45RAP



|         |        |      |           |         |         |            |          |  |      |            |                            |
|---------|--------|------|-----------|---------|---------|------------|----------|--|------|------------|----------------------------|
| ASHG19  |        |      |           |         |         |            |          |  |      |            |                            |
| SELNC2  |        |      |           | ENST00  |         |            |          |  |      | chr4:65779 |                            |
| A100008 |        |      |           | 0005099 | noncodi | ENSG000002 | RP11-    |  |      | 999-       |                            |
| 326     | 4.5601 | down | noncoding | 32      | ng      | 50125      | 707A18.1 |  | 4079 | 65870218:- | chr4:65832382:65858351:Ly3 |

ASHG19  
 SELNC2  
 A100018  
 246 3.117 down noncoding 22 ng 45532 NEAT1

ENST00  
 0005011 noncodi ENSG000002

22743

chr11:6519  
 0269- 199975:HBL1;chr11:65170828:65199000:Fetal  
 65213011:+ 5170913:65198109:CD34 Primary

chr11:6512442:6515494:Fetal Intestine  
 Large;chr11:65124669:65154911:Fetal  
 Intestine;chr11:65133472:65159026:HeLa;chr11:6513  
 4015:65159000:Pancreas;chr11:65137968:65159071:  
 NHDF-Ad;chr11:65138031:65158188:CD4 Memory  
 Primary 7pool;chr11:65144518:65155720:Pancreatic  
 islets;chr11:65145326:65155010:CD56;chr11:651459  
 99:65161052:Brain Hippocampus  
 Middle;chr11:65146765:65153405:Small  
 Intestine;chr11:65146897:65153444:Lung;chr11:6514  
 7327:65155112:Left  
 Ventricle;chr11:65148732:65154998:CD8  
 primary;chr11:65148822:65154999:Spleen;chr11:65  
 148895:65158002:CD4p CD25- Il17p PMAstim  
 Th17;chr11:65149077:65153410:Sigmoid  
 Colon;chr11:65157526:65198662:Fetal  
 Muscle;chr11:65157742:65225276:DHL6;chr11:6516  
 7786:65223197:Colon Crypt  
 2;chr11:65168731:65223379:CD20;chr11:65168909:  
 65198287:CD34 Primary  
 RO01549;chr11:65169738:65223378:Ly4;chr11:6517  
 0357:65224596:Tonsil;chr11:65170521:65225513:G  
 M12878;chr11:65170621:65223375:CD56;chr11:651  
 70629:65223372:CD19  
 Primary;chr11:65170631:65223404:CD14;chr11:651  
 70783:65198465:Ly3;chr11:65170809:65225246:Ly1  
 ;chr11:65170818:65198139:K562;chr11:65170820:65

|         |       |    |           |    |    |       |            |      |     |            |                                                 |
|---------|-------|----|-----------|----|----|-------|------------|------|-----|------------|-------------------------------------------------|
| ASHG19  |       |    |           |    |    |       |            |      |     |            | chr2:33666722:33710698:Skeletal                 |
| SELNC2  |       |    |           |    |    |       |            |      |     |            | Muscle;chr2:33699374:33790617:CD20;chr2:336995  |
| A100017 |       |    |           |    |    |       |            |      |     |            | 02:33727719:Ly3;chr2:33699588:33737763:DHL6;c   |
| 427     | 2.417 | up | noncoding | 80 | ng | 37133 | AC020594.5 | Gold | 338 |            | hr2:33699635:33724391:MM1S;chr2:33699875:3374   |
|         |       |    |           |    |    |       |            |      |     |            | 3353:Brain Cingulate                            |
|         |       |    |           |    |    |       |            |      |     |            | Gyrus;chr2:33699893:33727679:CD19               |
|         |       |    |           |    |    |       |            |      |     |            | Primary;chr2:33699905:33724425:HBL1;chr2:33699  |
|         |       |    |           |    |    |       |            |      |     |            | 910:33748217:Brain Hippocampus Middle           |
|         |       |    |           |    |    |       |            |      |     |            | 150;chr2:33699923:33725484:GM12878;chr2:33699   |
|         |       |    |           |    |    |       |            |      |     |            | 968:33727830:Tonsil;chr2:33700094:33736889:Brai |
|         |       |    |           |    |    |       |            |      |     |            | n Anterior                                      |
|         |       |    |           |    |    |       |            |      |     | chr2:33780 | Caudate;chr2:33750720:33761266:DHL6;chr2:33750  |
|         |       |    |           |    |    |       |            |      |     | 114-       | 850:33759069:CD19                               |
|         |       |    |           |    |    |       |            |      |     | 33788614;- | Primary;chr2:33750852:33769157:Ly3              |

ASHG19  
SELNC2  
A100010  
807 2.8396 up

noncoding  
15

ENST00  
0006077

ng

71788

CTD-  
2201E18.5

Reliable 811

chr5:43006  
835-  
43007645:-

chr5:42974744:43010144: Astrocytes; chr5:42982003:  
43021566: CD4 Memory Primary  
7pool; chr5:42982072:43021311: CD34 Primary  
RO01536; chr5:42982188:43021349: CD8 Memory  
7pool; chr5:42982625:43009005: CD34  
adult; chr5:42982779:43008925: CD34  
fetal; chr5:42984005:43021232: HeLa; chr5:42984195:  
43020926: Esophagus; chr5:42984237:43021003: Oste  
oblasts; chr5:42984869:43020974: NHLF; chr5:429850  
69:43010090: VACO  
9m; chr5:42987481:42997335: CD8  
primiary; chr5:42988207:43021793: CD56; chr5:42988  
303:42997081: CD4p CD25- Il17- PMAstim  
Th; chr5:42988340:43022194: CD4p CD25-  
CD45ROp Memory; chr5:42988541:42996957: CD4p  
CD25- CD45RAp  
Naive; chr5:42988679:43021490: CD4 Naive Primary  
8pool; chr5:42988731:43021440: CD8 Naive  
8pool; chr5:42988739:43021396: CD8 Naive  
7pool; chr5:42988783:43021518: CD3; chr5:42988888:  
43021861: CD4p CD25- Il17p PMAstim  
Th17; chr5:42988915:43022042: Tonsil; chr5:4298894  
0:43021536: CD4p CD225int CD127p  
Tmem; chr5:42989202:42996790: HUVEC; chr5:42989  
365:42996520: CD20; chr5:42989548:43021294: CD4  
Naive Primary 7pool; chr5:42989568:43021469: CD4  
Memory Primary  
8pool; chr5:42989815:43020989: Spleen; chr5:4298993  
1:43020950: Sigmoid  
Colon; chr5:42989941:43020943: Small



ASHG19  
SELNC2  
A100934  
297

2.2736 up

noncoding

ENST00  
0005515

03

ng

ENSG000002  
57261

RP11-  
96H19.1

Reliable 829

chr12:4677  
7462-  
46850051:+

chr12:46745509:46780090:Adipose  
Nuclei;chr12:46750690:46781406:HMEC;chr12:4675  
0696:46801411:Osteoblasts;chr12:46750818:467972  
47:NHEK;chr12:46751076:46781994:Left  
Ventricle;chr12:46752905:46785767:CD20;chr12:467  
54023:46782918:CD14;chr12:46754278:46783404:C  
D19  
Primary;chr12:46755152:46786747:Panc1;chr12:467  
58395:46797876:Duodenum Smooth  
Muscle;chr12:46758596:46785607:HUVVEC;chr12:46  
758835:46779688:Brain Hippocampus Middle  
150;chr12:46759700:46781118:CD4 Memory  
Primary  
7pool;chr12:46760895:46797996:HeLa;chr12:467609  
05:46783619:NHDF-  
Ad;chr12:46760966:46798138:NHLF;chr12:4676102  
2:46798920:Tonsil;chr12:46761111:46785610:Skelet  
al  
Muscle;chr12:46761122:46795854:Lung;chr12:46761  
154:46781460:CD34 Primary  
RO01536;chr12:46761219:46797045:Colon Crypt  
1;chr12:46761973:46778834:CD34 Primary  
RO01480;chr12:46762301:46780693:HCT-  
116;chr12:46762605:46799048:IMR90;chr12:467627  
40:46799125:Astrocytes;chr12:46762818:46799053:  
HSMM;chr12:46763090:46784642:Colon Crypt  
3;chr12:46763376:46781577:u87;chr12:46763621:46  
798940:Skeletal Muscle  
Myoblast;chr12:46763715:46785789:Toledo;chr12:4  
6763765:46785105:Fetal

|         |        |    |           |         |         |            |         |          |     |                                                          |
|---------|--------|----|-----------|---------|---------|------------|---------|----------|-----|----------------------------------------------------------|
| ASHG19  |        |    |           |         |         |            |         |          |     | chr12:46822847:46889265:HeLa;chr12:46822865:46889072:HUV |
| SELNC2  |        |    |           | ENST00  |         |            |         |          |     | chr12:4677 116;chr12:46823019:46848340:HMEC;chr12:468230 |
| A100934 |        |    |           | 0005515 | noncodi | ENSG000002 | RP11-   |          |     | 7462- 47:46850701:NHEK;chr12:46865752:46889668:IMR       |
| 297     | 2.2736 | up | noncoding | 03      | ng      | 57261      | 96H19.1 | Reliable | 829 | 46850051:+ 90                                            |

|         |        |      |           |         |         |            |          |  |     |                                         |
|---------|--------|------|-----------|---------|---------|------------|----------|--|-----|-----------------------------------------|
| ASHG19  |        |      |           |         |         |            |          |  |     | chrX:13367                              |
| SELNC2  |        |      |           | ENST00  |         |            |          |  |     | 7367-                                   |
| A100011 |        |      |           | 0004405 | noncodi | ENSG000002 |          |  |     | 133680662:                              |
| 127     | 3.4199 | down | noncoding | 70      | ng      | 23749      | MIR503HG |  | 760 | - chrX:133676035:133689032:Fetal Muscle |

|         |        |    |           |         |         |            |         |          |     |                                                                                                    |
|---------|--------|----|-----------|---------|---------|------------|---------|----------|-----|----------------------------------------------------------------------------------------------------|
| ASHG19  |        |    |           |         |         |            |         |          |     | chr3:184274276:184303185:Gastric;chr3:184279295:184303121:Esophagus;chr3:184280246:184445487:Fetal |
| SELNC2  |        |    |           | ENST00  |         |            |         |          |     | chr3:18445 Muscle;chr3:184281212:184287586:LNCaP;chr3:184                                          |
| A100015 |        |    |           | 0006100 | noncodi | ENSG000002 | RP11-   |          |     | 1863- 281285:184322501:Ovary;chr3:184444168:18448535                                               |
| 425     | 2.4506 | up | noncoding | 01      | ng      | 72970      | 329B9.4 | Reliable | 701 | 184456737: 9:HMEC;chr3:184454658:184491921:Esophagus;chr3:184455452:184492084:Gastric              |

|         |        |    |           |         |            |       |            |      |     |  |            |                                                  |
|---------|--------|----|-----------|---------|------------|-------|------------|------|-----|--|------------|--------------------------------------------------|
| ASHG19  |        |    |           |         |            |       |            |      |     |  | chr11:3875 | Naive                                            |
| SELNC2  |        |    | ENST00    |         |            |       |            |      |     |  | 548-       | 8pool;chr11:3855274:3864019:Tonsil;chr11:3855410 |
| A100018 |        |    | 0004158   | noncodi | ENSG000002 |       |            |      |     |  | 3876739;-  | :3889590:Jurkat;chr11:3855469:3882443:CD4p       |
| 084     | 3.4376 | up | noncoding | 09      | ng         | 28661 | AC090587.5 | Gold | 494 |  |            |                                                  |

chr11:3828001:3805071:Brain Hippocampus  
 Middle;chr11:3844341:3863605:Brain Cingulate  
 Gyrus;chr11:3844611:3863500:Brain Anterior  
 Caudate;chr11:3845140:3898531:CD4p CD25-  
 CD45RAp Naive;chr11:3845158:3863281:Brain  
 Inferior Temporal  
 Lobe;chr11:3845193:3980272:CD14;chr11:3845355:  
 3899942:CD4 Memory Primary  
 7pool;chr11:3845384:3863637:Brain Hippocampus  
 Middle 150;chr11:3845410:3902515:CD8  
 primary;chr11:3845421:3971821:CD20;chr11:38454  
 30:3883033:CD4p CD25- CD45ROp  
 Memory;chr11:3845565:3942226:CD56;chr11:38457  
 59:3902508:CD4p CD25- Il17- PMAstim  
 Th;chr11:3845795:3900261:K562;chr11:3845961:39  
 27658:Spleen;chr11:3846088:3902358:CD34  
 Primary  
 RO01536;chr11:3851143:3863755:Ly4;chr11:385158  
 9:3892955:CD4p CD25- Il17p PMAstim  
 Th17;chr11:3851747:3899797:CD8 Memory  
 7pool;chr11:3851899:3902363:Sigmoid  
 Colon;chr11:3851899:3902446:Small  
 Intestine;chr11:3852368:3916127:Duodenum Smooth  
 Muscle;chr11:3852445:3930490:Adipose  
 Nuclei;chr11:3852540:3863525:CD34 Primary  
 RO01480;chr11:3852790:3887721:CD3;chr11:38529  
 46:3899571:Esophagus;chr11:3853570:3882689:CD8



|         |        |    |           |         |            |       |          |      |      |                                                          |
|---------|--------|----|-----------|---------|------------|-------|----------|------|------|----------------------------------------------------------|
| ASHG19  |        |    |           |         |            |       |          |      |      | chr3:128198402:128209972:Spleen;chr3:128198463:          |
| SELNC2  |        |    |           |         |            |       |          |      |      | 128215333:CD34 Primary                                   |
| A100002 |        |    | NR_125    | noncodi | ENSG000002 | RP11- |          |      |      | RO01536;chr3:128199015:128216666:Lung;chr3:128           |
| 924     | 3.7377 | up | noncoding | 398     | ng         | 44300 | 475N22.4 | Gold | 2358 | chr3:12820 199025:128216656:LNCaP;chr3:128199676:1282119 |
|         |        |    |           |         |            |       |          |      |      | 8046- 13:HUVEC;chr3:128200879:128224614:K562;chr3:1      |
|         |        |    |           |         |            |       |          |      |      | 128222050: 28201129:128212495:CD34 Primary               |
|         |        |    |           |         |            |       |          |      |      | + RO01480;chr3:128203519:128216818:VACO 503              |

ASHG19  
 SELNC2  
 A100214 NR\_147 noncodi ENSG000000  
 214 10.237 down noncoding 027 ng 65357 DGKA

3005

chr12:56292202:56332486:CD4 Memory Primary  
 7pool;chr12:56302603:56334475:HMEC;chr12:5630  
 6687:56352905:CD4p CD25- Il17- PMAstim  
 Th;chr12:56307923:56334720:Spleen;chr12:5631463  
 7:56334486:Ly1;chr12:56318608:56335563:CD4p  
 CD25- Il17p PMAstim  
 Th17;chr12:56318620:56334637:Toledo;chr12:56318  
 690:56337112:CD4p CD25- CD45RAp  
 Naive;chr12:56318758:56335005:DND41;chr12:5631  
 8932:56334295:Fetal  
 Thymus;chr12:56319159:56334646:Tonsil;chr12:563  
 19466:56334663:CD8 Naive  
 8pool;chr12:56319590:56334983:Esophagus;chr12:5  
 6319793:56330449:CD4 Memory Primary  
 chr12:5632 8pool;chr12:56320106:56330422:CD4 Naive Primary  
 5812- 7pool;chr12:56322364:56334228:Thymus;chr12:563  
 56347807:+ 22937:56334125:NHEK



|         |       |    |           |         |         |            |          |          |     |   |                                                    |
|---------|-------|----|-----------|---------|---------|------------|----------|----------|-----|---|----------------------------------------------------|
| ASHG19  |       |    |           |         |         |            |          |          |     |   | chr9:132307310:132401372:HCT-116;                  |
| SELNC2  |       |    |           | ENST00  |         |            |          |          |     |   | chr9:132309709:132335646:Brain Hippocampus Middle; |
| A100007 |       |    |           | 0004550 | noncodi | ENSG000002 | RP11-    |          |     |   | chr9:132310209:132334432:Ovary;                    |
| 404     | 2.292 | up | noncoding | 74      | ng      | 34789      | 483H20.4 | Reliable | 470 | + | chr9:132310862:132333634:Brain Mid Frontal Lobe;   |
|         |       |    |           |         |         |            |          |          |     |   | chr9:132318659:132373604:VACO                      |
|         |       |    |           |         |         |            |          |          |     |   | chr9:13240400;                                     |
|         |       |    |           |         |         |            |          |          |     |   | chr9:132329526:132339892:u87;                      |
|         |       |    |           |         |         |            |          |          |     |   | chr9:132345516                                     |
|         |       |    |           |         |         |            |          |          |     |   | 2755-:132373414:HepG2;                             |
|         |       |    |           |         |         |            |          |          |     |   | chr9:132346510:132400220:Sple                      |
|         |       |    |           |         |         |            |          |          |     |   | 132403561:en;                                      |
|         |       |    |           |         |         |            |          |          |     |   | chr9:132357063:132374195:Gastric;                  |
|         |       |    |           |         |         |            |          |          |     |   | chr9:1323882                                       |
|         |       |    |           |         |         |            |          |          |     |   | 45:132417334:Adrenal Gland                         |

|         |        |      |           |         |         |            |            |      |  |            |                                              |
|---------|--------|------|-----------|---------|---------|------------|------------|------|--|------------|----------------------------------------------|
| ASHG19  |        |      |           |         |         |            |            |      |  |            |                                              |
| SELNC2  |        |      |           | ENST00  |         |            |            |      |  | chr18:2426 |                                              |
| A100201 |        |      |           | 0005794 | noncodi | ENSG000002 |            |      |  | 7585-      | chr18:24264779:24297524:RPMI-                |
| 998     | 4.2045 | up   | noncoding | 58      | ng      | 65369      | U3         | 2598 |  | 24283602:- | 8402;chr18:24275980:24297873:DND41           |
|         |        |      |           |         |         |            |            |      |  |            |                                              |
| ASHG19  |        |      |           |         |         |            |            |      |  | chr7:10738 |                                              |
| SELNC2  |        |      |           | ENST00  |         |            |            |      |  | 3262-      | chr7:107381985:107387665:CD8                 |
| A101019 |        |      |           | 0004575 | noncodi | ENSG000002 |            |      |  | 107384573: | primiary;chr7:107382877:107389728:CD4p CD25- |
| 206     | 2.487  | up   | noncoding | 10      | ng      | 41764      | AC002467.7 | 657  |  | -          | Il17p PMAstim Th17                           |
|         |        |      |           |         |         |            |            |      |  |            |                                              |
| ASHG19  |        |      |           |         |         |            |            |      |  | chr18:8949 | chr18:8937264:8953874:HSMM;chr18:8942949:895 |
| SELNC2  |        |      |           | MICT00  |         |            |            |      |  | 324-       | 4393:NHDF-Ad;chr18:8943424:8953874:Skeletal  |
| A100296 |        |      |           | 0001583 | noncodi | CATG000000 | CATG000000 |      |  | 8993838:+  | Muscle Myoblast                              |
| 803     | 5.8361 | down | noncoding | 78      | ng      | 35089      | 35089.1    | 4250 |  |            |                                              |

|         |        |      |           |         |         |            |            |      |           |                                                 |
|---------|--------|------|-----------|---------|---------|------------|------------|------|-----------|-------------------------------------------------|
| ASHG19  |        |      |           |         |         |            |            |      |           | chr18:8982364:9023448:u87;chr18:8982365:9023286 |
| SELNC2  |        |      |           | MICT00  |         |            |            |      |           | chr18:8949 :CD4 Memory Primary                  |
| A100296 |        |      |           | 0001583 | noncodi | CATG000000 | CATG000000 |      |           | 324- 7pool;chr18:8993682:9023368:CD8 Memory     |
| 803     | 5.8361 | down | noncoding | 78      | ng      | 35089      | 35089.1    | 4250 | 8993838:+ | 7pool;chr18:8993940:9023254:K562                |

|         |        |    |           |         |         |            |       |     |            |                                                                                                                                        |
|---------|--------|----|-----------|---------|---------|------------|-------|-----|------------|----------------------------------------------------------------------------------------------------------------------------------------|
| ASHG19  |        |    |           |         |         |            |       |     |            | chr22:42980294:43018064:Lung;chr22:42997730:43020259:Spleen;chr22:43004520:43020614:Sigmoid Colon;chr22:43004823:43012398:CD34 Primary |
| SELNC2  |        |    |           | ENST00  |         |            |       |     |            | chr22:4301 RO01536;chr22:43008667:43012611:CD8 Memory                                                                                  |
| A101120 |        |    |           | 0006024 | noncodi | ENSG000002 |       |     |            | 1250- 7pool;chr22:43008826:43012539:CD4 Memory                                                                                         |
| 258     | 2.9811 | up | noncoding | 78      | ng      | 70022      | RNU12 | 664 | 43011913:+ | Primary 7pool                                                                                                                          |

|         |        |      |           |         |         |            |            |      |            |                                                                                                                                                                                                                                      |
|---------|--------|------|-----------|---------|---------|------------|------------|------|------------|--------------------------------------------------------------------------------------------------------------------------------------------------------------------------------------------------------------------------------------|
| ASHG19  |        |      |           |         |         |            |            |      |            | chr6:35982015:36096681:CD14;chr6:35994969:36046831:CD34 Primary                                                                                                                                                                      |
| SELNC2  |        |      |           | ENST00  |         |            |            |      |            | RO01536;chr6:35995126:36007828:CD34 Primary                                                                                                                                                                                          |
| A100003 |        |      |           | 0005266 | noncodi | ENSG000002 | RP1-       |      |            | RO01549;chr6:35995354:36008175:CD34 Primary                                                                                                                                                                                          |
| 756     | 4.1115 | down | noncoding | 11      | ng      | 46982      | 179N16.6   | 587  | 36164980:- | RO01480;chr6:36058244:36115204:CD4p CD25-II17- PMAstim                                                                                                                                                                               |
|         |        |      |           |         |         |            |            |      |            | Th;chr6:36061446:36100892:CD20;chr6:36062072:36091854:DHL6;chr6:36062112:36100843:Tonsil;chr6:36062202:36110219:CD8                                                                                                                  |
|         |        |      |           |         |         |            |            |      |            | primiary;chr6:36062310:36100665:Sigmoid                                                                                                                                                                                              |
|         |        |      |           |         |         |            |            |      |            | Colon;chr6:36062352:36104672:Ly4;chr6:36062393:36091739:Jurkat;chr6:36065757:36110004:CD56;chr6:36065879:36091862:Fetal                                                                                                              |
|         |        |      |           |         |         |            |            |      |            | Thymus;chr6:36067006:36091887:CD19                                                                                                                                                                                                   |
|         |        |      |           |         |         |            |            |      |            | Primary;chr6:36067039:36091884:CD3;chr6:36067089:36089645:Thymus;chr6:36082566:36100282:Colon Crypt 2;chr6:36084612:36088861:CD34                                                                                                    |
|         |        |      |           |         |         |            |            |      |            | adult;chr6:36085071:36102084:Fetal                                                                                                                                                                                                   |
|         |        |      |           |         |         |            |            |      |            | chr6:36114 Intestine;chr6:36085398:36102228:Fetal Intestine                                                                                                                                                                          |
|         |        |      |           |         |         |            |            |      |            | 475- Large;chr6:36088692:36118702:Adrenal                                                                                                                                                                                            |
|         |        |      |           |         |         |            |            |      |            | Gland;chr6:36097600:36100433:VACO 400                                                                                                                                                                                                |
| ASHG19  |        |      |           |         |         |            |            |      |            | chr5:52613699:52675409:HMEC;chr5:52613974:52640087:NHEK;chr5:52616175:52675561:u87;chr5:52621713:52735533:Osteoblasts;chr5:52655268:52675314:NHEK;chr5:52655451:52727176:NHLF;chr5:52691931:52727310:u87;chr5:52692543:52726861:HeLa |
| SELNC2  |        |      |           | MICT00  |         |            |            |      |            | chr5:52593 ;chr5:52692775:52722046:NHDF-                                                                                                                                                                                             |
| A100005 |        |      |           | 0002822 | noncodi | CATG000000 | CATG000000 |      |            | 702- Ad;chr5:52693831:52726798:HMEC;chr5:52701847:52726740:NHEK                                                                                                                                                                      |
| 527     | 2.3619 | down | noncoding | 17      | ng      | 79741      | 79741.1    | 4296 | 52619385:- |                                                                                                                                                                                                                                      |

|         |        |    |           |         |            |       |         |          |     |                                                                                                                                                                                                                                                                                                                                                                                                                                                                                                                                                                                                                                                                                                                                                                                                                                                                                                                                                                                                                                                                                                                                                                                                                                                                                                                                        |
|---------|--------|----|-----------|---------|------------|-------|---------|----------|-----|----------------------------------------------------------------------------------------------------------------------------------------------------------------------------------------------------------------------------------------------------------------------------------------------------------------------------------------------------------------------------------------------------------------------------------------------------------------------------------------------------------------------------------------------------------------------------------------------------------------------------------------------------------------------------------------------------------------------------------------------------------------------------------------------------------------------------------------------------------------------------------------------------------------------------------------------------------------------------------------------------------------------------------------------------------------------------------------------------------------------------------------------------------------------------------------------------------------------------------------------------------------------------------------------------------------------------------------|
| ASHG19  |        |    |           |         |            |       |         |          |     | chr8:1344801925:134501478:CD4p CD25- Il17-<br>PMastim Th;chr8:134477147:134543390:CD4p<br>CD25- CD45RAp<br>Naive;chr8:134478014:134584309:CD8<br>primary;chr8:134479403:134540188:CD8 Naive<br>8pool;chr8:134485145:134518237:CD20;chr8:13448<br>5660:134546122:CD4p CD25- Il17p PMastim<br>Th17;chr8:134490651:134585327:Adrenal<br>Gland;chr8:134494104:134561290:CD4 Memory<br>Primary 7pool;chr8:134494808:134563457:Adipose<br>Nuclei;chr8:134495384:134552578:Brain Inferior<br>Temporal<br>Lobe;chr8:134495803:134517089:Ovary;chr8:134496<br>520:134587951:Lung;chr8:134496637:134588231:Le<br>ft Ventricle;chr8:134496712:134550611:Brain<br>Anterior Caudate;chr8:134496813:134587940:Right<br>Atrium;chr8:134497072:134518457:CD34 Primary<br>RO01480;chr8:134497139:134544764:Tonsil;chr8:13<br>4497225:134586114:Psoas<br>Muscle;chr8:134497326:134561099:Small<br>Intestine;chr8:134497349:134585225:CD34 Primary<br>RO01536;chr8:134497358:134544690:CD4p CD25-<br>CD45ROp<br>Memory;chr8:134497368:134541302:CD56;chr8:134<br>497637:134585612:Spleen;chr8:134497849:1345529<br>61:CD34 Primary<br>chr8:13458<br>RO01549;chr8:134497867:134540128:CD3;chr8:134<br>5426-<br>497913:134540282:Sigmoid<br>134586104:<br>Colon;chr8:134497980:134518247:CD8 Naive<br>+<br>7pool;chr8:134498219:134585268:Gastric;chr8:1345 |
| SELNC2  |        |    | ENST00    |         |            |       |         |          |     |                                                                                                                                                                                                                                                                                                                                                                                                                                                                                                                                                                                                                                                                                                                                                                                                                                                                                                                                                                                                                                                                                                                                                                                                                                                                                                                                        |
| A100016 |        |    | 0005617   | noncodi | ENSG000002 | RP11- |         |          |     |                                                                                                                                                                                                                                                                                                                                                                                                                                                                                                                                                                                                                                                                                                                                                                                                                                                                                                                                                                                                                                                                                                                                                                                                                                                                                                                                        |
| 135     | 3.0776 | up | noncoding | 61      | ng         | 61220 | 629O1.2 | Reliable | 679 |                                                                                                                                                                                                                                                                                                                                                                                                                                                                                                                                                                                                                                                                                                                                                                                                                                                                                                                                                                                                                                                                                                                                                                                                                                                                                                                                        |

|         |        |      |           |         |            |       |         |  |     |                                               |
|---------|--------|------|-----------|---------|------------|-------|---------|--|-----|-----------------------------------------------|
| ASHG19  |        |      |           |         |            |       |         |  |     | chr5:19682                                    |
| SELNC2  |        |      | ENST00    |         |            |       |         |  |     | 08-                                           |
| A100361 |        |      | 0005145   | noncodi | ENSG000002 | RP11- |         |  |     | chr5:1930374:1976494:HMEC;chr5:1935720:197599 |
| 869     | 2.1239 | down | noncoding | 19      | ng         | 49731 | 259O2.3 |  | 560 | 1969127:+<br>8:NHEK                           |



|         |        |      |           |         |         |            |          |          |     |                                                  |
|---------|--------|------|-----------|---------|---------|------------|----------|----------|-----|--------------------------------------------------|
| ASHG19  |        |      |           |         |         |            |          |          |     | chr17:3780822:3821212:NCI-                       |
| SELNC2  |        |      |           | ENST00  |         |            |          |          |     | H82;chr17:3782275:3834937:H2171;chr17:3785708:   |
| A100018 |        |      |           | 0005718 | noncodi | ENSG000002 | RP11-    |          |     | 3797716:Pancreatic                               |
| 437     | 4.6799 | down | noncoding | 90      | ng      | 63312      | 459C13.1 | Reliable | 549 | islets;chr17:3788616:3800500:LNCaP;chr17:378882  |
|         |        |      |           |         |         |            |          |          |     | 8:3800155:Adrenal                                |
|         |        |      |           |         |         |            |          |          |     | Gland;chr17:3789755:3800117:HeLa;chr17:3798207:  |
|         |        |      |           |         |         |            |          |          |     | 3808782:Pancreas;chr17:3807098:3872953:CD20;chr  |
|         |        |      |           |         |         |            |          |          |     | 17:3807403:3821299:CD19                          |
|         |        |      |           |         |         |            |          |          |     | Primary;chr17:3813770:3833405:CD34 Primary       |
|         |        |      |           |         |         |            |          |          |     | RO01480;chr17:3859604:3882957:Colon Crypt        |
|         |        |      |           |         |         |            |          |          |     | 1;chr17:3862172:3882989:Sigmoid                  |
|         |        |      |           |         |         |            |          |          |     | chr17:3880                                       |
|         |        |      |           |         |         |            |          |          |     | Colon;chr17:3862322:3890678:Ly4;chr17:3862373:3  |
|         |        |      |           |         |         |            |          |          |     | 397-                                             |
|         |        |      |           |         |         |            |          |          |     | 893138:Gastric;chr17:3862385:3887616:Colon Crypt |
|         |        |      |           |         |         |            |          |          |     | 3;chr17:3862399:3882040:Colon Crypt 2            |

|         |        |    |           |         |         |            |          |          |     |                                        |
|---------|--------|----|-----------|---------|---------|------------|----------|----------|-----|----------------------------------------|
| ASHG19  |        |    |           |         |         |            |          |          |     |                                        |
| SELNC2  |        |    |           | ENST00  |         |            |          |          |     | chr6:11487                             |
| A100000 |        |    |           | 0004231 | noncodi | ENSG000002 | RP11-    |          |     | 459-                                   |
| 533     | 2.0708 | up | noncoding | 49      | ng      | 42753      | 716O23.2 | Reliable | 686 | 11515943:+ chr6:11514469:11582667:CD14 |

|         |        |      |           |         |         |            |         |          |     |                                            |
|---------|--------|------|-----------|---------|---------|------------|---------|----------|-----|--------------------------------------------|
| ASHG19  |        |      |           |         |         |            |         |          |     |                                            |
| SELNC2  |        |      |           | ENST00  |         |            |         |          |     | chr12:1169                                 |
| A100000 |        |      |           | 0005364 | noncodi | ENSG000002 | RP11-   |          |     | 4329-                                      |
| 654     | 2.2918 | down | noncoding | 92      | ng      | 56237      | 434C1.2 | Reliable | 188 | 11708772:- chr12:11697180:11734342:GM12878 |

ASHG19  
 SELNC2  
 A100741  
 866 6.1669 down noncoding 83 ng 38184 CD81-AS1

ENST00  
 0004134 noncodi ENSG000002

1460

chr11:2349  
 20:2423041:CD8  
 979-  
 2399222:-  
 Lobe

chr11:2379166:2423231:Toledo;chr11:2384244:2423  
 032:Fetal Muscle;chr11:2386580:2423670:Brain  
 Cingulate Gyrus;chr11:2386845:2423552:Brain  
 Hippocampus Middle;chr11:2386961:2423243:Brain  
 Hippocampus Middle  
 150;chr11:2387120:2422815:Spleen;chr11:2387137:2  
 423018:Left  
 Ventricle;chr11:2387292:2442798:Pancreatic  
 islets;chr11:2388166:2423432:Brain Inferior  
 Temporal Lobe;chr11:2388513:2422861:Right  
 Atrium;chr11:2394892:2423073:Lung;chr11:2395526  
 :2405370:Pancreas;chr11:2395645:2421627:Right  
 Ventricle;chr11:2396049:2421634:LNCaP;chr11:239  
 8060:2423320:Tonsil;chr11:2398089:2423448:DHL6  
 ;chr11:2398408:2423549:Esophagus;chr11:2398461:  
 2423269:Stomach Smooth  
 Muscle;chr11:2398466:2421655:Adrenal  
 Gland;chr11:2398488:2421768:Gastric;chr11:239853  
 8:2422923:Sigmoid  
 Colon;chr11:2398637:2421637:Ovary;chr11:2398638  
 :2422699:Small  
 Intestine;chr11:2398650:2421664:Bladder;chr11:2398  
 654:2423526:HUVEC;chr11:2398720:2421659:Aorta  
 ;chr11:2398754:2423055:Brain Anterior  
 Caudate;chr11:2398764:2421885:NHLF;chr11:23989

|         |        |      |           |         |         |            |              |      |   |                                                          |
|---------|--------|------|-----------|---------|---------|------------|--------------|------|---|----------------------------------------------------------|
| ASHG19  |        |      |           |         |         |            |              |      |   | chr7:13646                                               |
| SELNC2  |        |      |           | ENST00  |         |            |              |      |   | 8822-                                                    |
| A100508 |        |      |           | 0004396 | noncodi | ENSG000002 |              |      |   | 136866518:                                               |
| 698     | 2.5289 | down | noncoding | 94      | ng      | 34352      | hsa-mir-490  | 2160 | - | chr7:136756737:136770185:IMR90                           |
| ASHG19  |        |      |           |         |         |            |              |      |   | chr3:15845                                               |
| SELNC2  |        |      |           | ENST00  |         |            |              |      |   | 3510- chr3:158417299:158446457:Osteoblasts;chr3:158418   |
| A100018 |        |      |           | 0006074 | noncodi | ENSG000002 |              |      |   | 158455694: 055:158446367:u87;chr3:158428493:158509261:HC |
| 210     | 6.42   | down | noncoding | 26      | ng      | 40207      | RP11-379F4.4 | 2185 | + | C1954                                                    |
| ASHG19  |        |      |           |         |         |            |              |      |   | chr10:1014                                               |
| SELNC2  |        |      |           | ENST00  |         |            |              |      |   | 11746- chr10:101413386:101450232:NHEK;chr10:10141373     |
| A100003 |        |      |           | 0004523 | noncodi | ENSG000002 | RP11-        |      |   | 101413662: 7:101446675:HMEC;chr10:101417897:101470925:O  |
| 595     | 2.3974 | up   | noncoding | 91      | ng      | 29278      | 483F11.7     | 303  | - | steoblasts                                               |

|         |        |    |           |         |         |            |           |  |     |   |                                           |                                                |
|---------|--------|----|-----------|---------|---------|------------|-----------|--|-----|---|-------------------------------------------|------------------------------------------------|
| ASHG19  |        |    |           |         |         |            |           |  |     |   | chr3:17715                                | chr3:177137525:177182475:HBL1;chr3:177161083:1 |
| SELNC2  |        |    |           | ENST00  |         |            |           |  |     |   | 9752-                                     | 77176223:HMEC;chr3:177166709:177209811:HSM     |
| A100595 |        |    |           | 0004390 | noncodi | ENSG000002 |           |  |     |   | 177470093:                                | M;chr3:177166755:177212994:HSMMtube;chr3:177   |
| 013     | 4.3115 | up | noncoding | 09      | ng      | 28221      | LINC00578 |  | 542 | + | 167294:177209811:Skeletal Muscle Myoblast |                                                |

|         |        |    |           |         |         |            |           |     |   |                                  |
|---------|--------|----|-----------|---------|---------|------------|-----------|-----|---|----------------------------------|
| ASHG19  |        |    |           |         |         |            |           |     |   | chr3:17715                       |
| SELNC2  |        |    |           | ENST00  |         |            |           |     |   | 9752-                            |
| A100595 |        |    |           | 0004390 | noncodi | ENSG000002 |           |     |   | 177470093:                       |
| 013     | 4.3115 | up | noncoding | 09      | ng      | 28221      | LINC00578 | 542 | + | chr3:177239011:177247462:HCC1954 |

|         |        |    |           |         |         |            |           |     |   |                               |
|---------|--------|----|-----------|---------|---------|------------|-----------|-----|---|-------------------------------|
| ASHG19  |        |    |           |         |         |            |           |     |   | chr3:17715                    |
| SELNC2  |        |    |           | ENST00  |         |            |           |     |   | 9752-                         |
| A100595 |        |    |           | 0004390 | noncodi | ENSG000002 |           |     |   | 177470093:                    |
| 013     | 4.3115 | up | noncoding | 09      | ng      | 28221      | LINC00578 | 542 | + | chr3:177254857:177274845:MM1S |

|         |        |    |           |         |         |            |              |     |                                                         |
|---------|--------|----|-----------|---------|---------|------------|--------------|-----|---------------------------------------------------------|
| ASHG19  |        |    |           |         |         |            |              |     | chr3:17715                                              |
| SELNC2  |        |    |           | ENST00  |         |            |              |     | 9752-                                                   |
| A100595 |        |    |           | 0004390 | noncodi | ENSG000002 |              |     | chr3:177286633:177337735:Esophagus;chr3:1773061         |
| 013     | 4.3115 | up | noncoding | 09      | ng      | 28221      | LINC00578    | 542 | 177470093: 47:177341813:HCC1954;chr3:177306304:17732160 |
|         |        |    |           |         |         |            |              |     | 6:HMEC                                                  |
|         |        |    |           |         |         |            |              |     | chr1:3369291:3379649:Colon Crypt                        |
|         |        |    |           |         |         |            |              |     | 1;chr1:3369308:3400613:Colon Crypt                      |
|         |        |    |           |         |         |            |              |     | 3;chr1:3369766:3400716:Gastric;chr1:3369826:3378        |
|         |        |    |           |         |         |            |              |     | 616:Sigmoid                                             |
|         |        |    |           |         |         |            |              |     | Colon;chr1:3369862:3389121:HepG2;chr1:3369890:          |
| ASHG19  |        |    |           | ENST00  |         |            |              |     | chr1:34038                                              |
| SELNC2  |        |    |           | 0006064 | noncodi | ENSG000002 |              |     | 3388971:VACO 400;chr1:3370110:3400518:Colon             |
| A100008 |        |    |           | 0006064 | noncodi | ENSG000002 |              |     | 10-                                                     |
| 480     | 4.2758 | up | noncoding | 89      | ng      | 72088      | RP11-168F9.2 | 382 | Crypt 2;chr1:3370203:3378252:Small                      |
|         |        |    |           |         |         |            |              |     | 3404191:+ Intestine;chr1:3398373:3429749:VACO 503       |





ASHG19  
 SELNC2  
 A100008  
 186 2.1942 down noncoding 54 ng 37243 AC022173.2

ENST00  
 0004185 noncodi ENSG000002

577

chr7:137547857:137685459:Aorta;chr7:137555704:137584984:u87;chr7:137554800:137687567:Adipose Nuclei;chr7:137555121:137577100:HSMMtube;chr7:137555122:137694058:Osteoblasts;chr7:137557067:137568482:Astrocytes;chr7:137593088:137639682:NHLF;chr7:137604649:137687377:Duodenum Smooth Muscle;chr7:137607422:137687098:Astrocytes;chr7:137607525:137687119:Skeletal Muscle Myoblast;chr7:137607525:137687119:HSMM;chr7:137617110:137693771:K562;chr7:137617125:137687164:Small Intestine;chr7:137617129:137687914:Fetal Intestine Large;chr7:137619190:137688004:Fetal Intestine;chr7:137620547:137687600:HSMMtube;chr7:137636282:137693717:Esophagus;chr7:137637016:137694029:u87;chr7:137637809:137688187:HUVEC;chr7:137642825:137686950:Adrenal Gland;chr7:137651409:137687395:Brain Hippocampus Middle;chr7:137654671:137687008:NHLF;chr7:137654894:137687749:Fetal Muscle;chr7:137655243:137687096:Gastric;chr7:137655346:137685403:Ovary;chr7:137658847:137687032:NHDF-Ad;chr7:137659004:137687209:Sigmoid Colon;chr7:137663061:137686865:IMR90;chr7:137663463:137694162:HBL1;chr7:137663926:137675940:Adipose chr7:137638094-Tissue;chr7:137664409:137678967:Toledo;chr7:137664421:137694313:Ly3;chr7:137667788:137686994:HepG2

|         |        |      |           |         |         |            |            |      |     |  |            |                                                |
|---------|--------|------|-----------|---------|---------|------------|------------|------|-----|--|------------|------------------------------------------------|
| ASHG19  |        |      |           |         |         |            |            |      |     |  | chr21:4398 | RO01536;chr21:43923342:43955458:CD34 Primary   |
| SELNC2  |        |      |           | ENST00  |         |            |            |      |     |  | 0484-      | RO01549;chr21:43923429:43959315:Ly1;chr21:4392 |
| A100012 |        |      |           | 0004426 | noncodi | ENSG000002 |            |      |     |  | 43982044:- | 3441:43957929:Ly4;chr21:43932351:43960870:Panc |
| 118     | 3.8577 | down | noncoding | 05      | ng      | 35772      | AP001625.6 | Gold | 575 |  |            |                                                |

chr21:43757982:43806895:Fetal Intestine  
Intestine;chr21:43730685:43758943:Fetal Intestine  
Large;chr21:43757982:43806895:Gastric;chr21:43780  
529:43802188:MCF-  
7;chr21:43799180:43852233:Ly4;chr21:43803401:43  
822621:Fetal Intestine  
Large;chr21:43804333:43884935:CD4p CD25- Il17-  
PMastim Th;chr21:43811298:43847226:RPMI-  
8402;chr21:43812665:43860867:CD4p CD25- Il17p  
PMastim  
Th17;chr21:43812947:43846499:Thymus;chr21:4381  
7601:43885276:CD4p CD25- CD45RAp  
Naive;chr21:43821017:43884964:CD4 Memory  
Primary 7pool;chr21:43821140:43847081:CD4p  
CD25- CD45ROp  
Memory;chr21:43822733:43849247:DND41;chr21:43  
823272:43846161:CD4p CD225int CD127p  
Tmem;chr21:43823401:43845869:CD3;chr21:438235  
58:43846366:CD4 Naive Primary  
8pool;chr21:43869691:43914914:Fetal Intestine  
Large;chr21:43869692:43913942:Colon Crypt  
2;chr21:43873255:43914930:Fetal  
Intestine;chr21:43875255:43914249:Small  
Intestine;chr21:43876507:43895539:Sigmoid  
Colon;chr21:43877926:43913973:Colon Crypt  
1;chr21:43879292:43899707:Ly3;chr21:43905520:43  
968853:CD34 Primary

|         |        |      |           |         |         |            |          |          |     |            |                                                |
|---------|--------|------|-----------|---------|---------|------------|----------|----------|-----|------------|------------------------------------------------|
| ASHG19  |        |      |           |         |         |            |          |          |     |            |                                                |
| SELNC2  |        |      |           | ENST00  |         |            |          |          |     | chr15:7061 |                                                |
| A100006 |        |      |           | 0005582 | noncodi | ENSG000002 | RP11-    |          |     | 3915-      | chr15:70527791:70578137:Ly3;chr15:70538923:706 |
| 111     | 5.6732 | down | noncoding | 26      | ng      | 59503      | 543G18.1 | Reliable | 527 | 70619081:+ | 21552:Ly4                                      |

|         |        |      |           |         |         |            |              |          |     |            |                              |
|---------|--------|------|-----------|---------|---------|------------|--------------|----------|-----|------------|------------------------------|
| ASHG19  |        |      |           |         |         |            |              |          |     |            | chr1:21960                   |
| SELNC2  |        |      |           | ENST00  |         |            |              |          |     | 8494-      |                              |
| A100000 |        |      |           | 0004207 | noncodi | ENSG000002 |              |          |     | 219615984: |                              |
| 375     | 2.2308 | down | noncoding | 62      | ng      | 30024      | RP11-95P13.1 | Reliable | 451 | -          | chr1:219595400:219639325:u87 |

|         |        |    |           |         |         |            |           |          |      |            |                                            |
|---------|--------|----|-----------|---------|---------|------------|-----------|----------|------|------------|--------------------------------------------|
| ASHG19  |        |    |           |         |         |            |           |          |      |            | chr14:1024                                 |
| SELNC2  |        |    |           | ENST00  |         |            |           |          |      | 14684-     | chr14:102413635:102440255:VACO             |
| A100014 |        |    |           | 0006074 | noncodi | ENSG000002 | RP11-     |          |      | 102415762: | 503;chr14:102413638:102448327:NHDF-        |
| 651     | 2.3221 | up | noncoding | 14      | ng      | 71780      | 1017G21.5 | Reliable | 1079 | +          | Ad;chr14:102413684:102439387:Colon Crypt 3 |

|         |        |      |           |         |         |            |           |               |                                                             |
|---------|--------|------|-----------|---------|---------|------------|-----------|---------------|-------------------------------------------------------------|
| ASHG19  |        |      |           |         |         |            |           |               | chr5:11124                                                  |
| SELNC2  |        |      |           | ENST00  |         |            |           |               | 8205-                                                       |
| A100426 |        |      |           | 0005072 | noncodi | ENSG000002 |           |               | 111353003: chr5:111262196:111343599:Osteoblasts;chr5:111318 |
| 625     | 2.3754 | down | noncoding | 22      | ng      | 50095      | NREP-AS1  | 610           | + 991:111342063:Astrocytes                                  |
|         |        |      |           |         |         |            |           |               | chr10:88719833:88732392:Ly3;chr10:88725396:887              |
|         |        |      |           |         |         |            |           |               | 33241:HCT-                                                  |
|         |        |      |           |         |         |            |           |               | 116;chr10:88725450:88733264:Aorta;chr10:8872602             |
| ASHG19  |        |      |           |         |         |            |           |               | 2:88733482:Lung;chr10:88726149:88733229:VACO                |
| SELNC2  |        |      |           | ENST00  |         |            |           |               | chr10:8872                                                  |
| A100571 |        |      |           | 0004182 | noncodi | ENSG000002 |           |               | 503;chr10:88726170:88733391:Esophagus;chr10:887             |
| 319     | 2.3459 | down | noncoding | 73      | ng      | 72734      | ADIRF-AS1 | 2627          | 5497- 26179:88734770:NHEK;chr10:88727449:88732182:          |
|         |        |      |           |         |         |            |           |               | 88731068:- Ovary;chr10:88727564:88732348:NHLF               |
|         |        |      |           |         |         |            |           |               |                                                             |
|         |        |      |           |         |         |            |           |               | chr17:77760586:77818726:LNCaP;chr17:77763821:7              |
|         |        |      |           |         |         |            |           |               | 7789395:VACO                                                |
|         |        |      |           |         |         |            |           |               | 503;chr17:77770172:77788111:GLC16;chr17:777732              |
| ASHG19  |        |      |           |         |         |            |           |               | 73:77827285:Toledo;chr17:77775993:77811118:K56              |
| SELNC2  |        |      |           | ENST00  |         |            |           |               | 2;chr17:77802901:77825355:Gastric;chr17:77804578            |
| A100010 |        |      |           | 0005769 | noncodi | ENSG000002 | RP11-     |               | chr17:7779                                                  |
| 015     | 12.685 | up   | noncoding | 63      | ng      | 62772      | 353N14.2  | Reliable 1788 | 7251- :77818301:Pancreas;chr17:77804734:77826977:Esop       |
|         |        |      |           |         |         |            |           |               | hagus;chr17:77805883:77825877:VACO                          |
|         |        |      |           |         |         |            |           |               | 77801503:+ 503;chr17:77809448:77827375:Fetal Intestine      |



|         |        |      |           |         |         |            |              |      |                                                                                                                                                                                                                                                                                                                                                                                                                                                                                                                                                                                                                                                                                                                                                                                                                                                                                                                                                                                                                                                                                                                                                                 |
|---------|--------|------|-----------|---------|---------|------------|--------------|------|-----------------------------------------------------------------------------------------------------------------------------------------------------------------------------------------------------------------------------------------------------------------------------------------------------------------------------------------------------------------------------------------------------------------------------------------------------------------------------------------------------------------------------------------------------------------------------------------------------------------------------------------------------------------------------------------------------------------------------------------------------------------------------------------------------------------------------------------------------------------------------------------------------------------------------------------------------------------------------------------------------------------------------------------------------------------------------------------------------------------------------------------------------------------|
| ASHG19  |        |      |           |         |         |            |              |      | chr1:31944906:31977293:Toledo;chr1:31948563:31981686:DND41;chr1:31974167:32058180:Fetal Intestine;chr1:31974366:32058187:Colon Crypt 1;chr1:32001720:32055384:Small Intestine;chr1:32014154:32058191:VACO 503;chr1:32028014:32063653:HUVEC;chr1:32029384:32058106:Colon Crypt 2;chr1:32033757:32059228:Aorta;chr1:32033763:32062625:Left Ventricle;chr1:32033943:32062686:Spleen;chr1:32034109:32062571:Right Atrium;chr1:32037967:32057981:Esophagus;chr1:32038018:32055476:Lung;chr1:32038201:32058632:Stomach Smooth Muscle;chr1:32038276:32055532:Sigmoid Colon;chr1:32038364:32058589:Duodenum Smooth Muscle;chr1:32038461:32055389:Gastric;chr1:32038488:32055215:VACO 400;chr1:32038607:32054952:Pancreas chr19:42899140:42938638:Brain Hippocampus Middle;chr19:42899739:42938263:Brain Inferior Temporal Lobe;chr19:42899800:42938152:Brain Anterior Caudate;chr19:42899816:42938392:Brain Cingulate Gyrus;chr19:42899939:42942433:Adipose Nuclei;chr19:42900120:42938388:Brain Hippocampus Middle 150;chr19:42900412:42927712:Brain Angular Gyrus;chr19:42925113:42954769:Gastric;chr19:42948421-1647:42994085:HCC 1954;chr19:42984371:43004012:HepG2 |
| SELNC2  |        |      |           | ENST00  |         |            |              |      | chr1:31984                                                                                                                                                                                                                                                                                                                                                                                                                                                                                                                                                                                                                                                                                                                                                                                                                                                                                                                                                                                                                                                                                                                                                      |
| A100868 |        |      |           | 0004120 | noncodi | ENSG000002 |              |      | 036-                                                                                                                                                                                                                                                                                                                                                                                                                                                                                                                                                                                                                                                                                                                                                                                                                                                                                                                                                                                                                                                                                                                                                            |
| 230     | 2.1217 | up   | noncoding | 68      | ng      | 23907      | RP11-439L8.4 | 2741 | 31989846:+                                                                                                                                                                                                                                                                                                                                                                                                                                                                                                                                                                                                                                                                                                                                                                                                                                                                                                                                                                                                                                                                                                                                                      |
| ASHG19  |        |      |           |         |         |            |              |      | chr19:4292                                                                                                                                                                                                                                                                                                                                                                                                                                                                                                                                                                                                                                                                                                                                                                                                                                                                                                                                                                                                                                                                                                                                                      |
| SELNC2  |        |      |           | ENST00  |         |            |              |      | 8421-                                                                                                                                                                                                                                                                                                                                                                                                                                                                                                                                                                                                                                                                                                                                                                                                                                                                                                                                                                                                                                                                                                                                                           |
| A100500 |        |      |           | 0004572 | noncodi | ENSG000002 |              |      | 43030021:+                                                                                                                                                                                                                                                                                                                                                                                                                                                                                                                                                                                                                                                                                                                                                                                                                                                                                                                                                                                                                                                                                                                                                      |
| 809     | 2.9481 | down | noncoding | 34      | ng      | 13904      | LIPE-AS1     | 1501 | 2:HepG2                                                                                                                                                                                                                                                                                                                                                                                                                                                                                                                                                                                                                                                                                                                                                                                                                                                                                                                                                                                                                                                                                                                                                         |
| ASHG19  |        |      |           |         |         |            |              |      | chr16:2195325:2205839:Pancreatic islets;chr16:2197196:2210499:HCT-116;chr16:2199546:2229416:Esophagus;chr16:2200572:2214258:Colon Crypt 2;chr16:2202672:2212123:NHLF;chr16:2202718:2212205359:-                                                                                                                                                                                                                                                                                                                                                                                                                                                                                                                                                                                                                                                                                                                                                                                                                                                                                                                                                                 |
| SELNC2  |        |      |           | ENST00  |         |            |              |      | chr16:2204                                                                                                                                                                                                                                                                                                                                                                                                                                                                                                                                                                                                                                                                                                                                                                                                                                                                                                                                                                                                                                                                                                                                                      |
| A100006 |        |      |           | 0005631 | noncodi | ENSG000002 | RP11-        |      | 798-                                                                                                                                                                                                                                                                                                                                                                                                                                                                                                                                                                                                                                                                                                                                                                                                                                                                                                                                                                                                                                                                                                                                                            |
| 894     | 2.1097 | up   | noncoding | 92      | ng      | 60260      | 304L19.5     | 342  | 4221:VACO 9m                                                                                                                                                                                                                                                                                                                                                                                                                                                                                                                                                                                                                                                                                                                                                                                                                                                                                                                                                                                                                                                                                                                                                    |

|         |        |    |           |         |            |       |              |          |            |                                                |
|---------|--------|----|-----------|---------|------------|-------|--------------|----------|------------|------------------------------------------------|
| ASHG19  |        |    |           |         |            |       |              |          |            |                                                |
| SELNC2  |        |    | ENST00    |         |            |       |              |          | chr16:3146 |                                                |
| A100012 |        |    | 0005692   | noncodi | ENSG000002 |       |              |          | 0856-      | chr16:31441143:31472106:Psoas                  |
| 316     | 2.2498 | up | noncoding | 91      | ng         | 61474 | RP11-452L6.1 | Reliable | 449        | 31464814:- Muscle;chr16:31463739:31472341:K562 |

|         |        |    |           |         |            |       |          |  |      |                                     |
|---------|--------|----|-----------|---------|------------|-------|----------|--|------|-------------------------------------|
| ASHG19  |        |    |           |         |            |       |          |  |      |                                     |
| SELNC2  |        |    | ENST00    |         |            |       |          |  |      | chr7:75920                          |
| A100013 |        |    | 0006094   | noncodi | ENSG000002 | RP5-  |          |  |      | 93-                                 |
| 135     | 5.2941 | up | noncoding | 97      | ng         | 72894 | 1159O4.1 |  | 1578 | 7606627:- chr7:7604880:7614065:CD20 |





|         |        |    |           |         |            |       |          |     |  |  |                                                            |
|---------|--------|----|-----------|---------|------------|-------|----------|-----|--|--|------------------------------------------------------------|
| ASHG19  |        |    |           |         |            |       |          |     |  |  | chr8:24117286:24247817:CD20;chr8:24125659:2416             |
| SELNC2  |        |    | ENST00    |         |            |       |          |     |  |  | chr8:24153 9134:HBL1;chr8:24150260:24190101:Tonsil;chr8:24 |
| A100151 |        |    | 0005189   | noncodi | ENSG000002 | RP11- |          |     |  |  | 327- 205065:24255630:Tonsil;chr8:24206035:24246836:        |
| 940     | 2.3196 | up | noncoding | 88      | ng         | 53535 | 624C23.1 | 741 |  |  | 24245028:- CD19 Primary                                    |

ASHG19  
SELNC2  
A100010  
696 9.8906 up

noncoding  
69

ENST00  
0005372 noncodi  
57084

U47924.27 Gold 350

chr12:7072  
409-  
7073610:+

chr12:7021510:7026081:H2171;chr12:7022000:7051  
380:Brain Cingulate  
Gyrus;chr12:7022685:7051255:Stomach Smooth  
Muscle;chr12:7022964:7047898:GLC16;chr12:70324  
34:7039694:H2171;chr12:7032586:7039696:Lung;ch  
r12:7033029:7039703:Esophagus;chr12:7033041:704  
8410:Right Atrium;chr12:7033067:7050686:Brain  
Angular  
Gyrus;chr12:7033253:7051404:LNCaP;chr12:703329  
1:7048082:Fetal  
Muscle;chr12:7033383:7048045:Ovary;chr12:703351  
4:7048028:H1;chr12:7033555:7047595:Bladder;chr1  
2:7033612:7047812:Pancreas;chr12:7033631:705566  
6:VACO 503;chr12:7033645:7047280:Right  
Ventricle;chr12:7044264:7072113:CD14;chr12:70444  
26:7072735:CD34 Primary  
RO01536;chr12:7044970:7072648:CD19  
Primary;chr12:7045010:7071657:CD4 Naive Primary  
7pool;chr12:7045041:7071857:CD4p CD225int  
CD127p  
Tmem;chr12:7045046:7072000:CD3;chr12:7045125:  
7071857:CD8 Naive  
7pool;chr12:7045276:7072350:CD56;chr12:7045399:  
7071773:Ly3;chr12:7045533:7071721:CD8 Naive  
8pool;chr12:7045550:7072074:CD4 Naive Primary  
8pool;chr12:7045555:7071876:CD4 Memory  
Primary  
8pool;chr12:7045612:7071479:Toledo;chr12:704563  
6:7072391:Thymus;chr12:7045722:7069352:Ly4;chr  
12:7045931:7071909:GM12878;chr12:7050709:7057



ASHG19  
 SELNC2  
 A100004  
 606 2.5822 up noncoding 45 ng 58560 CTD-2376I20.1 Reliable 548

chr14:100455259:100507456:MCU-  
 7;chr14:100478260:100500070:Osteoblasts;chr14:10  
 0482837:100516659:HSM;chr14:100482934:1005  
 16645:Skeletal Muscle  
 Myoblast;chr14:100514734:100586793:DND41;chr1  
 4:100520595:100549173:CD34 Primary  
 RO01536;chr14:100520682:100546624:CD34  
 Primary  
 RO01549;chr14:100522443:100594774:CD4p CD25-  
 Il17- PMAstim  
 Th;chr14:100522811:100614800:CD4p CD25-  
 CD45RAp Naive;chr14:100523024:100582652:CD4p  
 CD25- CD45ROp  
 Memory;chr14:100523234:100586008:CD20;chr14:1  
 00523285:100550411:Fetal  
 Thymus;chr14:100523340:100588458:CD4 Memory  
 Primary  
 7pool;chr14:100523524:100549949:Tonsil;chr14:100  
 523769:100549857:Jurkat;chr14:100524339:1005805  
 40:CD8  
 primary;chr14:100524448:100574855:CD3;chr14:10  
 0524674:100598765:CD4p CD25- Il17p PMAstim  
 Th17;chr14:100524703:100553687:CD56;chr14:1005  
 25251:100546411:Small  
 Intestine;chr14:100527280:100548954:Thymus;chr14  
 :100527557:100553587:CD4p CD225int CD127p  
 chr14:1005 Tmem;chr14:100528449:100546559:CD8 Memory  
 19140- 7pool;chr14:100528456:100549806:CD4 Memory  
 100541215: Primary 8pool;chr14:100528476:100549448:CD4  
 - Naive Primary

|         |        |      |           |         |         |            |         |  |     |                                                       |
|---------|--------|------|-----------|---------|---------|------------|---------|--|-----|-------------------------------------------------------|
| ASHG19  |        |      |           |         |         |            |         |  |     | chr10:114089841:114099802:Fetal Intestine             |
| SELNC2  |        |      |           | ENST00  |         |            |         |  |     | Large;chr10:114091751:114167822:Colon Crypt           |
| A100186 |        |      |           | 0005984 | noncodi | ENSG000002 | RP11-   |  |     | 1;chr10:114118589:114150503:HeLa;chr10:1141192        |
| 253     | 5.7559 | down | noncoding | 47      | ng      | 32934      | 324O2.3 |  | 792 | chr10:1141                                            |
|         |        |      |           |         |         |            |         |  |     | 45:114199281:Fetal Intestine                          |
|         |        |      |           |         |         |            |         |  |     | 66032- Large;chr10:114119280:114166412:HCT-           |
|         |        |      |           |         |         |            |         |  |     | 114169248: 116;chr10:114119392:114167923:Small        |
|         |        |      |           |         |         |            |         |  |     | - Intestine;chr10:114119440:114170199:Fetal Intestine |

|         |        |    |           |         |         |            |         |          |     |                                                           |
|---------|--------|----|-----------|---------|---------|------------|---------|----------|-----|-----------------------------------------------------------|
| ASHG19  |        |    |           |         |         |            |         |          |     | chr7:10592                                                |
| SELNC2  |        |    |           | ENST00  |         |            |         |          |     | chr7:105920170:105927354:CD4p CD25- II17p                 |
| A100008 |        |    |           | 0006092 | noncodi | ENSG000002 | RP11-   |          |     | 5926- PMAstim Th17;chr7:105921719:105932507:Fetal         |
| 499     | 2.0033 | up | noncoding | 81      | ng      | 73320      | 22N19.2 | Reliable | 847 | 105926772: Intestine Large;chr7:105922548:105932471:Fetal |
|         |        |    |           |         |         |            |         |          |     | + Intestine                                               |

|         |        |    |           |         |         |            |          |          |     |                                               |
|---------|--------|----|-----------|---------|---------|------------|----------|----------|-----|-----------------------------------------------|
| ASHG19  |        |    |           |         |         |            |          |          |     | chr9:38360                                    |
| SELNC2  |        |    |           | ENST00  |         |            |          |          |     | 424- chr9:38373991:38395597:Fetal Intestine   |
| A100018 |        |    |           | 0004225 | noncodi | ENSG000002 | RP11-    |          |     | 38376427:+ Large;chr9:38376064:38397910:Aorta |
| 023     | 2.2099 | up | noncoding | 54      | ng      | 23716      | 113O24.3 | Reliable | 399 |                                               |

|         |        |    |           |         |            |       |           |          |     |                                          |
|---------|--------|----|-----------|---------|------------|-------|-----------|----------|-----|------------------------------------------|
| ASHG19  |        |    |           |         |            |       |           |          |     |                                          |
| SELNC2  |        |    | ENST00    |         |            |       |           |          |     | chr20:5110                               |
| A100008 |        |    | 0004162   | noncodi | ENSG000002 | RP5-  |           |          |     | 4461-                                    |
| 929     | 2.9684 | up | noncoding | 37      | ng         | 32465 | 1022J11.2 | Reliable | 573 | 51117130:- chr20:51105907:51114975:HUVEC |

|         |        |    |           |         |            |       |          |          |      |                                                     |
|---------|--------|----|-----------|---------|------------|-------|----------|----------|------|-----------------------------------------------------|
| ASHG19  |        |    |           |         |            |       |          |          |      | chr1:28561517:28594636:CD8 Memory                   |
| SELNC2  |        |    | ENST00    |         |            |       |          |          |      | 7pool;chr1:28561754:28594379:Fetal Intestine        |
| A100000 |        |    | 0006047   | noncodi | ENSG000002 | RP5-  |          |          |      | chr1:28566                                          |
| 773     | 2.8357 | up | noncoding | 16      | ng         | 70605 | 1092A3.4 | Reliable | 1945 | 020- Large;chr1:28567934:28588340:NHEK;chr1:2857020 |
|         |        |    |           |         |            |       |          |          |      | 3:28594681:CD4 Memory Primary                       |
|         |        |    |           |         |            |       |          |          |      | 28567964:- 7pool;chr1:28572835:28606098:K562        |

|         |        |      |           |         |         |            |              |      |            |                                                                                                                                                                                                                                                                                                                                                                                                                                                                                                                                                                                                                       |
|---------|--------|------|-----------|---------|---------|------------|--------------|------|------------|-----------------------------------------------------------------------------------------------------------------------------------------------------------------------------------------------------------------------------------------------------------------------------------------------------------------------------------------------------------------------------------------------------------------------------------------------------------------------------------------------------------------------------------------------------------------------------------------------------------------------|
| ASHG19  |        |      |           |         |         |            |              |      |            | chr16:86591173:86653733:Aorta;chr16:86596520:86644503:HSMMtube;chr16:86596603:86670683:Osteoblasts;chr16:86596748:86630272:u87;chr16:86596888:86625094:HUVEC;chr16:86597302:86623506:Panel1;chr16:86598500:86625119:Astrocytes;chr16:86602139:86624292:NHLF                                                                                                                                                                                                                                                                                                                                                           |
| SELNC2  |        |      |           | ENST00  |         |            |              |      | chr16:8659 |                                                                                                                                                                                                                                                                                                                                                                                                                                                                                                                                                                                                                       |
| A100013 |        |      |           | 0005632 | noncodi | ENSG000002 | RP11-        |      | 8751-      |                                                                                                                                                                                                                                                                                                                                                                                                                                                                                                                                                                                                                       |
| 854     | 3.8629 | down | noncoding | 80      | ng      | 60944      | 46309.5      | 319  | 86601367:- | chr6:39720961:39829617:Brain Anterior Caudate;chr6:39732733:39871672:Brain Hippocampus Middle 150;chr6:39732791:39876756:Brain Hippocampus Middle;chr6:39732850:39876155:Brain Inferior Temporal Lobe;chr6:39732882:39876926:Brain Cingulate Gyrus;chr6:39758289:39829579:Brain Angular Gyrus;chr6:39768980:39830070:Aorta;chr6:39771319:39860627:Spleen;chr6:39776033:39824152:Duodenum Smooth Muscle;chr6:39777127:39803586:Brain Mid Frontal Lobe;chr6:39832635:39860559:Jurkat;chr6:39844382:39860932:Aorta;chr6:39846831:39860544:Osteoblasts;chr6:39847655:39857422:HSMM;chr6:39847754:39857272:Skeletal Muscle |
| ASHG19  |        |      |           |         |         |            |              |      |            | chr6:39851                                                                                                                                                                                                                                                                                                                                                                                                                                                                                                                                                                                                            |
| SELNC2  |        |      |           | ENST00  |         |            |              |      | 292-       |                                                                                                                                                                                                                                                                                                                                                                                                                                                                                                                                                                                                                       |
| A100740 |        |      |           | 0006072 | noncodi | ENSG000002 | RP11-61113.3 |      | 39854344:- | Myoblast;chr6:39848548:39858066:HSMMtube                                                                                                                                                                                                                                                                                                                                                                                                                                                                                                                                                                              |
| 135     | 2.476  | up   | noncoding | 15      | ng      | 35033      |              | 3053 |            |                                                                                                                                                                                                                                                                                                                                                                                                                                                                                                                                                                                                                       |

|         |       |      |           |         |         |            |          |          |     |  |  |  |  |            |            |                             |                      |  |  |  |
|---------|-------|------|-----------|---------|---------|------------|----------|----------|-----|--|--|--|--|------------|------------|-----------------------------|----------------------|--|--|--|
| ASHG19  |       |      |           |         |         |            |          |          |     |  |  |  |  |            |            |                             |                      |  |  |  |
| SELNC2  |       |      |           | ENST00  |         |            |          |          |     |  |  |  |  |            | chr5:95385 |                             |                      |  |  |  |
| A100010 |       |      |           | 0005079 | noncodi | ENSG000002 | RP11-    |          |     |  |  |  |  | 819-       |            | chr5:95358200:95387335:u87; | chr5:95358700:953859 |  |  |  |
| 649     | 2.352 | down | noncoding | 97      | ng      | 50551      | 254I22.1 | Reliable | 704 |  |  |  |  | 95551223:+ | 47:HMEC    |                             |                      |  |  |  |

|         |       |      |           |         |         |            |          |          |     |  |  |  |  |            |            |                             |                      |  |  |  |
|---------|-------|------|-----------|---------|---------|------------|----------|----------|-----|--|--|--|--|------------|------------|-----------------------------|----------------------|--|--|--|
| ASHG19  |       |      |           |         |         |            |          |          |     |  |  |  |  |            |            |                             |                      |  |  |  |
| SELNC2  |       |      |           | ENST00  |         |            |          |          |     |  |  |  |  |            | chr5:95385 |                             |                      |  |  |  |
| A100010 |       |      |           | 0005079 | noncodi | ENSG000002 | RP11-    |          |     |  |  |  |  | 819-       |            | chr5:95400495:95433256:u87; | chr5:95400831:954308 |  |  |  |
| 649     | 2.352 | down | noncoding | 97      | ng      | 50551      | 254I22.1 | Reliable | 704 |  |  |  |  | 95551223:+ | 64:HMEC;   | chr5:95401054:95431114:NHEK |                      |  |  |  |



|         |       |      |           |         |         |            |          |          |     |            |                              |
|---------|-------|------|-----------|---------|---------|------------|----------|----------|-----|------------|------------------------------|
| ASHG19  |       |      |           |         |         |            |          |          |     |            |                              |
| SELNC2  |       |      |           | ENST00  |         |            |          |          |     | chr5:95385 |                              |
| A100010 |       |      |           | 0005079 | noncodi | ENSG000002 | RP11-    |          |     | 819-       |                              |
| 649     | 2.352 | down | noncoding | 97      | ng      | 50551      | 254I22.1 | Reliable | 704 | 95551223:+ | chr5:95449665:95456469:HepG2 |

|         |       |      |           |         |         |            |          |          |     |            |                                                  |
|---------|-------|------|-----------|---------|---------|------------|----------|----------|-----|------------|--------------------------------------------------|
| ASHG19  |       |      |           |         |         |            |          |          |     |            | chr5:95533625:95596006:Osteoblasts;chr5:95554848 |
| SELNC2  |       |      |           | ENST00  |         |            |          |          |     |            | :95596132:Skeletal Muscle                        |
| A100010 |       |      |           | 0005079 | noncodi | ENSG000002 | RP11-    |          |     | chr5:95385 | Myoblast;chr5:95554848:95596194:HSMM;chr5:955    |
| 649     | 2.352 | down | noncoding | 97      | ng      | 50551      | 254I22.1 | Reliable | 704 | 819-       | 54865:95565313:HMEC;chr5:95577923:95596155:I     |
|         |       |      |           |         |         |            |          |          |     | 95551223:+ | MR90                                             |

|         |        |    |           |         |         |            |           |     |  |            |                                                |
|---------|--------|----|-----------|---------|---------|------------|-----------|-----|--|------------|------------------------------------------------|
| ASHG19  |        |    |           |         |         |            |           |     |  |            |                                                |
| SELNC2  |        |    |           | ENST00  |         |            |           |     |  | chr1:47644 | chr1:47644197:47660664:K562;chr1:47644485:4765 |
| A100001 |        |    |           | 0004293 | noncodi | ENSG000002 |           |     |  | 922-       | 9072:VACO 400;chr1:47645265:47648938:CD34      |
| 112     | 3.6504 | up | noncoding | 28      | ng      | 24805      | LINC00853 | 661 |  | 47646011:+ | fetal                                          |

ASHG19  
 SELNC2  
 A100005  
 356 2.3565 down noncoding 81 ENST00  
 0005643 noncodi ENSG000002 RP11-  
 ng 61045 673P17.4 Reliable 689

chr16:27180758:2719510:101e00;chr16:2710289:27270958:Small  
 Intestine;chr16:27210329:27271069:Sigmoid  
 Colon;chr16:27211121:27269924:Gastric;chr16:2721  
 9367:27254473:Pancreas;chr16:27232475:27265537:  
 NHDF-  
 Ad;chr16:27232583:27270134:IMR90;chr16:272328  
 97:27250352:Toledo;chr16:27233000:27271199:Lun  
 g;chr16:27233020:27270465:NHLF;chr16:27234684:  
 27257134:DND41;chr16:27236435:27266186:CD8  
 primary;chr16:27236550:27266388:CD4p CD25-  
 CD45RAp Naive;chr16:27239895:27267778:CD4p  
 CD25- Il17- PMAstim  
 Th;chr16:27241177:27266265:CD56;chr16:27241349  
 :27266178:CD4p CD25- Il17p PMAstim  
 Th17;chr16:27241372:27250118:CD3;chr16:2724141  
 0:27250160:CD4 Naive Primary  
 8pool;chr16:27245404:27272047:HUVEC;chr16:272  
 45453:27271543:Duodenum Smooth  
 Muscle;chr16:27245721:27299114:u87;chr16:272458  
 10:27298846:Osteoblasts;chr16:27278542:27286412:  
 HepG2;chr16:27282675:27411338:CD14;chr16:2728  
 4252:27343050:Tonsil;chr16:27297077:27344019:Sp  
 leen;chr16:27323721:27343148:Sigmoid  
 Colon;chr16:27323935:27342883:CD4p CD25- Il17p  
 PMAstim  
 Th17;chr16:27323967:27347443:IMR90;chr16:27324  
 066:27389987:CD4p CD25- CD45RAp  
 Naive;chr16:27324110:27347987:Duodenum Smooth  
 Muscle;chr16:27324129:27347889:Osteoblasts;chr16:

|         |        |      |           |         |         |            |            |      |            |                                                              |
|---------|--------|------|-----------|---------|---------|------------|------------|------|------------|--------------------------------------------------------------|
| ASHG19  |        |      |           |         |         |            |            |      |            | chr5:34562075:34612134:u87;chr5:34563079:346409              |
| SELNC2  |        |      |           | ENCT00  |         |            |            |      |            | chr5:34584 59:Osteoblasts;chr5:34570192:34589139:Ly3;chr5:34 |
| A100006 |        |      |           | 0003566 | noncodi | CATG000000 | CATG000000 |      |            | 233- 570810:34629237:HUVEC;chr5:34585276:34610586            |
| 314     | 5.3044 | down | noncoding | 26      | ng      | 79483      | 79483.1    | 2129 | 34586361:- | :HCC1954                                                     |

|         |        |    |           |         |         |            |          |              |            |                                                 |
|---------|--------|----|-----------|---------|---------|------------|----------|--------------|------------|-------------------------------------------------|
| ASHG19  |        |    |           |         |         |            |          |              |            |                                                 |
| SELNC2  |        |    |           | ENST00  |         |            |          |              |            | chr10:1345                                      |
| A100015 |        |    |           | 0004482 | noncodi | ENSG000002 | RP11-    |              |            | 7202-                                           |
| 859     | 2.1861 | up | noncoding | 72      | ng      | 33256      | 445K13.2 | Reliable 454 | 13465133:+ | chr10:13432444:13460519:K562                    |
|         |        |    |           |         |         |            |          |              |            | chr14:100802621:100843836:CD14;chr14:10082795   |
|         |        |    |           |         |         |            |          |              |            | 4:100908202:Sigmoid                             |
|         |        |    |           |         |         |            |          |              |            | Colon;chr14:100838663:100843727:K562;chr14:100  |
|         |        |    |           |         |         |            |          |              |            | 838710:100875111:Small                          |
|         |        |    |           |         |         |            |          |              |            | Intestine;chr14:100847356:100916786:Pancreatic  |
|         |        |    |           |         |         |            |          |              |            | islets;chr14:100849438:100914373:DND41;chr14:10 |
|         |        |    |           |         |         |            |          |              |            | 0849724:100908815:Colon Crypt                   |
|         |        |    |           |         |         |            |          |              |            | 1;chr14:100850213:100908776:Colon Crypt         |
|         |        |    |           |         |         |            |          |              |            | 2;chr14:100871635:100914256:HeLa;chr14:1008809  |
|         |        |    |           |         |         |            |          |              |            | 89:101160433:H2171;chr14:100998206:101015206:   |
|         |        |    |           |         |         |            |          |              |            | Pancreas;chr14:101010832:101032668:Colon Crypt  |
|         |        |    |           |         |         |            |          |              |            | 2;chr14:101082708:101114187:DND41;chr14:10111   |
|         |        |    |           |         |         |            |          |              |            | 9022:101150896:Fetal                            |
|         |        |    |           |         |         |            |          |              |            | Muscle;chr14:101124062:101147937:Fetal          |

|         |        |    |           |         |         |            |              |              |   |                                                            |
|---------|--------|----|-----------|---------|---------|------------|--------------|--------------|---|------------------------------------------------------------|
| ASHG19  |        |    |           |         |         |            |              |              |   | chr14:1012                                                 |
| SELNC2  |        |    |           | ENST00  |         |            |              |              |   | Intestine;chr14:101124290:101148211:VACO                   |
| A100006 |        |    |           | 0006088 | noncodi | ENSG000002 |              |              |   | 03922- 400;chr14:101125048:101181157:Adrenal               |
| 220     | 2.0547 | up | noncoding | 76      | ng      | 73087      | RP11-566J3.4 | Reliable 640 | + | 101204561: Gland;chr14:101130625:101147924:Ovary;chr14:101 |
|         |        |    |           |         |         |            |              |              |   | 174098:101207742:Fetal Muscle                              |

|         |        |    |           |    |    |       |           |     |                                                     |
|---------|--------|----|-----------|----|----|-------|-----------|-----|-----------------------------------------------------|
| ASHG19  |        |    |           |    |    |       |           |     | chr10:101648092:101770791:Osteoblasts;chr10:1016    |
| SELNC2  |        |    |           |    |    |       |           |     | 64796:101770704:HUVEC;chr10:101664881:101695        |
| A100503 |        |    |           |    |    |       |           |     | 667:HCT-                                            |
| 198     | 2.3594 | up | noncoding | 93 | ng | 27695 | DNMBP-AS1 | 474 | 116;chr10:101665653:101706057:NHEK;chr10:1016       |
|         |        |    |           |    |    |       |           |     | 68336:101692968:Colon Crypt                         |
|         |        |    |           |    |    |       |           |     | 1;chr10:101671600:101679256:H1;chr10:101672994:     |
|         |        |    |           |    |    |       |           |     | 101693123:Fetal                                     |
|         |        |    |           |    |    |       |           |     | Intestine;chr10:101673005:101693213:Fetal Intestine |
|         |        |    |           |    |    |       |           |     | Large;chr10:101691338:101769690:NHDF-               |
|         |        |    |           |    |    |       |           |     | Ad;chr10:101720491:101781196:Panc1;chr10:10172      |
|         |        |    |           |    |    |       |           |     | 2368:101770605:Astrocytes;chr10:101722470:10176     |
|         |        |    |           |    |    |       |           |     | 9727:NHLF;chr10:101722958:101769501:NHEK;chr        |
|         |        |    |           |    |    |       |           |     | chr10:1016                                          |
|         |        |    |           |    |    |       |           |     | 10:101722972:101745859:HMEC;chr10:101735144:        |
|         |        |    |           |    |    |       |           |     | 86767-                                              |
|         |        |    |           |    |    |       |           |     | 101769681:Duodenum Smooth                           |
|         |        |    |           |    |    |       |           |     | 101689595: Muscle;chr10:101735315:101766481:Fetal   |
|         |        |    |           |    |    |       |           |     | +                                                   |
|         |        |    |           |    |    |       |           |     | Muscle;chr10:101735570:101786058:Fetal Thymus       |

|         |        |      |           |         |         |            |              |     |  |            |                              |
|---------|--------|------|-----------|---------|---------|------------|--------------|-----|--|------------|------------------------------|
| ASHG19  |        |      |           |         |         |            |              |     |  |            |                              |
| SELNC2  |        |      |           | ENST00  |         |            |              |     |  | chr8:69760 |                              |
| A100000 |        |      |           | 0005223 | noncodi | ENSG000002 |              |     |  | 977-       |                              |
| 614     | 2.2073 | down | noncoding | 54      | ng      | 54337      | RP11-865I6.2 | 515 |  | 69764998:- | chr8:69762144:69787444:MCF-7 |

|         |        |      |           |         |         |            |          |     |  |            |                          |
|---------|--------|------|-----------|---------|---------|------------|----------|-----|--|------------|--------------------------|
| ASHG19  |        |      |           |         |         |            |          |     |  |            |                          |
| SELNC2  |        |      |           | ENST00  |         |            |          |     |  | chr8:25236 |                          |
| A100795 |        |      |           | 0005193 | noncodi | ENSG000002 | RP11-    |     |  | 14-        |                          |
| 225     | 2.2494 | down | noncoding | 93      | ng      | 54319      | 134O21.1 | 564 |  | 2585929:-  | chr8:2463918:2525201:Ly1 |

|         |        |    |           |         |         |            |          |              |  |            |                              |
|---------|--------|----|-----------|---------|---------|------------|----------|--------------|--|------------|------------------------------|
| ASHG19  |        |    |           |         |         |            |          |              |  |            |                              |
| SELNC2  |        |    |           | ENST00  |         |            |          |              |  | chr18:1190 |                              |
| A100014 |        |    |           | 0006096 | noncodi | ENSG000002 | RP11-    |              |  | 8711-      |                              |
| 662     | 2.8314 | up | noncoding | 11      | ng      | 73141      | 820I16.4 | Reliable 512 |  | 11909222:+ | chr18:11880570:11920297:CD14 |

|         |        |    |           |         |         |            |            |          |                                                          |
|---------|--------|----|-----------|---------|---------|------------|------------|----------|----------------------------------------------------------|
| ASHG19  |        |    |           |         |         |            |            |          | chr16:86374860:86431236:u87;chr16:86376516:8643          |
| SELNC2  |        |    |           | ENST00  |         |            |            |          | 1254:NHLF;chr16:86416810:86433203:IMR90;chr16            |
| A100010 |        |    |           | 0006027 | noncodi | ENSG000002 | RP11-      |          | :86428756:86497607:Stomach Smooth                        |
| 804     | 2.0818 | up | noncoding | 39      | ng      | 70020      | 46309.9    | Reliable | 3515                                                     |
|         |        |    |           |         |         |            |            |          | Muscle;chr16:86480878:86565786:Sigmoid                   |
|         |        |    |           |         |         |            |            |          | Colon;chr16:86480959:86565581:Gastric;chr16:8650         |
|         |        |    |           |         |         |            |            |          | 4285:86554076:Lung;chr16:86510165:86565537:Eso           |
|         |        |    |           |         |         |            |            |          | phagus;chr16:86510530:86552725:Stomach Smooth            |
|         |        |    |           |         |         |            |            |          | Muscle;chr16:86513308:86551280:Bladder;chr16:865         |
|         |        |    |           |         |         |            |            |          | 24338:86565693:Small                                     |
|         |        |    |           |         |         |            |            |          | Intestine;chr16:86525013:86551948:Duodenum               |
|         |        |    |           |         |         |            |            |          | Smooth Muscle;chr16:86525585:86554162:Fetal              |
|         |        |    |           |         |         |            |            |          | chr16:8655                                               |
|         |        |    |           |         |         |            |            |          | Intestine Large;chr16:86526034:86552021:Fetal            |
|         |        |    |           |         |         |            |            |          | 3989-                                                    |
|         |        |    |           |         |         |            |            |          | Intestine;chr16:86529885:86552655:IMR90;chr16:86         |
|         |        |    |           |         |         |            |            |          | 86557503:-                                               |
|         |        |    |           |         |         |            |            |          | 530125:86553839:NHLF                                     |
| ASHG19  |        |    |           |         |         |            |            |          | chr2:10595                                               |
| SELNC2  |        |    |           | ENST00  |         |            |            |          | chr2:105913213:105957119:CD34 Primary                    |
| A100013 |        |    |           | 0006100 | noncodi | ENSG000002 | RP11-      |          | 0484-                                                    |
| 144     | 3.4772 | up | noncoding | 36      | ng      | 72994      | 332H14.2   | Reliable | 3449                                                     |
|         |        |    |           |         |         |            |            |          | 105953932: RO01536;chr2:105936284:105948605:CD34 Primary |
|         |        |    |           |         |         |            |            |          | 105953932: RO01549;chr2:105939084:105957462:CD34 Primary |
|         |        |    |           |         |         |            |            |          | - RO01480                                                |
| ASHG19  |        |    |           |         |         |            |            |          | chr22:1915                                               |
| SELNC2  |        |    |           | ENST00  |         |            |            |          | chr22:19156696:19168167:Colon Crypt                      |
| A100018 |        |    |           | 0005651 | noncodi | ENSG000002 |            |          | 8908-                                                    |
| 416     | 4.7538 | up | noncoding | 62      | ng      | 60924      | AC004463.6 | Reliable | 1445                                                     |
|         |        |    |           |         |         |            |            |          | 3;chr22:19157026:19167980:CD4 Memory Primary             |
|         |        |    |           |         |         |            |            |          | 19160352:+                                               |
|         |        |    |           |         |         |            |            |          | 7pool;chr22:19158029:19173513:VACO 503                   |

|         |        |      |           |         |         |            |            |              |            |                                                                                                                                                  |
|---------|--------|------|-----------|---------|---------|------------|------------|--------------|------------|--------------------------------------------------------------------------------------------------------------------------------------------------|
| ASHG19  |        |      |           |         |         |            |            |              |            | chr17:792178020:79340912:Spieen;chr17:79289389:79371797:Colon Crypt                                                                              |
| SELNC2  |        |      |           | ENST00  |         |            |            |              |            | 1;chr17:79289831:79323226:Sigmoid                                                                                                                |
| A100263 |        |      |           | 0003320 | noncodi | ENSG000001 |            |              |            | Colon;chr17:79289981:79323303:VACO                                                                                                               |
| 911     | 2.2433 | down | noncoding | 12      | ng      | 85168      | LINC00482  | 2023         | 79283048:- | 503;chr17:79290171:79403662:Esophagus;chr17:79300756:79321472:Right                                                                              |
|         |        |      |           |         |         |            |            |              |            | Atrium;chr17:79300771:79323073:Lung;chr17:79300804:79320863:Small                                                                                |
|         |        |      |           |         |         |            |            |              |            | Intestine;chr17:79300868:79339893:Fetal Intestine                                                                                                |
|         |        |      |           |         |         |            |            |              |            | Large;chr17:79300913:79321146:Psoas                                                                                                              |
|         |        |      |           |         |         |            |            |              |            | Muscle;chr17:79301530:79306049:HCT-                                                                                                              |
|         |        |      |           |         |         |            |            |              |            | 116;chr17:79301586:79321519:Panc1;chr17:79301633:79340371:Fetal                                                                                  |
|         |        |      |           |         |         |            |            |              |            | Intestine;chr17:79301694:79319932:HeLa;chr17:79301741:79324408:VACO                                                                              |
|         |        |      |           |         |         |            |            |              |            | 400;chr17:79301790:79320769:VACO                                                                                                                 |
|         |        |      |           |         |         |            |            |              |            | 9m;chr17:79301804:79324787:Fetal                                                                                                                 |
|         |        |      |           |         |         |            |            |              |            | Muscle;chr17:79301805:79323383:LNCaP;chr17:79301842:79323135:Pancreatic                                                                          |
|         |        |      |           |         |         |            |            |              |            | islets;chr17:79302282:79323578:Gastric;chr17:79307665:79340673:Pancreas;chr17:79309282:79320792:Colon Crypt 2;chr17:79337759:79404370:Pancreatic |
|         |        |      |           |         |         |            |            |              |            | islets;chr17:79337783:79409252:Gastric;chr17:79337835:79405362:HCT-                                                                              |
|         |        |      |           |         |         |            |            |              |            | 116;chr17:79337884:79403652:Brain Hippocampus                                                                                                    |
|         |        |      |           |         |         |            |            |              |            | Middle;chr17:79337961:79404678:Lung;chr17:79338103:79377122:Brain Cingulate                                                                      |
|         |        |      |           |         |         |            |            |              |            | chr17:7927 Gyrus;chr17:79338165:79371677:LNCaP;chr17:79337571-8202:79375949:VACO                                                                 |
|         |        |      |           |         |         |            |            |              |            | 503;chr17:79338743:79379032:Brain Anterior                                                                                                       |
| ASHG19  |        |      |           |         |         |            |            |              |            | chr7:107530331:107645829:Adipose                                                                                                                 |
| SELNC2  |        |      |           | ENST00  |         |            |            |              |            | Nuclei;chr7:107572746:107613504:Osteoblasts;chr7:                                                                                                |
| A100004 |        |      |           | 0006085 | noncodi | ENSG000002 |            |              |            | chr7:10758 107573771:107614243:Duodenum Smooth                                                                                                   |
| 696     | 2.0955 | up   | noncoding | 15      | ng      | 73055      | CTB-13F3.1 | Reliable 625 | +          | 2561- Muscle;chr7:107599350:107651886:Sigmoid                                                                                                    |
|         |        |      |           |         |         |            |            |              |            | 107583185: Colon;chr7:107600201:107644110:Fetal                                                                                                  |
|         |        |      |           |         |         |            |            |              |            | Muscle;chr7:107629021:107671709:HUVEC                                                                                                            |



|         |        |    |           |         |            |       |          |      |            |                                 |                              |
|---------|--------|----|-----------|---------|------------|-------|----------|------|------------|---------------------------------|------------------------------|
| ASHG19  |        |    |           |         |            |       |          |      |            |                                 |                              |
| SELNC2  |        |    | ENST00    |         |            |       |          |      | chr19:1076 | chr19:10741990:10767090:Spleen; | chr19:10752771:1             |
| A100004 |        |    | 0005915   | noncodi | ENSG000002 |       |          |      | 2538-      | 0767663:CD8                     |                              |
| 655     | 2.0576 | up | noncoding | 01      | ng         | 67100 | ILF3-AS1 | 1983 | 10764520:- | primiary;                       | chr19:10753493:10767602:CD56 |

|         |        |      |           |         |         |            |              |      |  |                                                                                                                                                                                                                                                                                                                                |
|---------|--------|------|-----------|---------|---------|------------|--------------|------|--|--------------------------------------------------------------------------------------------------------------------------------------------------------------------------------------------------------------------------------------------------------------------------------------------------------------------------------|
| ASHG19  |        |      |           |         |         |            |              |      |  | chr15:31488741:31529489:Ly3;chr15:31495248:31567464:Fetal                                                                                                                                                                                                                                                                      |
| SELNC2  |        |      |           | ENST00  |         |            |              |      |  | Thymus;chr15:31494406:31509316:Thymus;chr15:31498214:31601710:H2171;chr15:31501187:31521891:Colon Crypt                                                                                                                                                                                                                        |
| A100246 |        |      |           | 0005592 | noncodi | ENSG000002 |              |      |  | 3;chr15:31506380:31529829:Lung;chr15:31506686:31529709:Gastric;chr15:31506849:31521905:Colon Crypt 2;chr15:31540520:31560349:CD34 adult;chr15:31546224:31561885:MM1S;chr15:31546396:31565926:Sigmoid                                                                                                                           |
| 467     | 2.0548 | down | noncoding | 92      | ng      | 59448      | RP11-16E12.1 | 1450 |  | Colon;chr15:31546427:31566598:CD14;chr15:31546551:31566005:Colon Crypt 2;chr15:31547101:31560613:Ly3;chr15:31547210:31562077:Thymus;chr15:31547899:31559717:CD34 fetal;chr15:31553451:31691257:Brain Hippocampus Middle;chr15:31553552:31601202:NCI-H69;chr15:31554198:31565550:Spleen;chr15:31554706:31685021:Brain Cingulate |
|         |        |      |           |         |         |            |              |      |  | Gyrus;chr15:31554850:31684654:Brain Anterior Caudate;chr15:31555127:31672882:Brain Inferior Temporal Lobe;chr15:31555415:31601468:Brain Hippocampus Middle                                                                                                                                                                     |
|         |        |      |           |         |         |            |              |      |  | 150;chr15:31558669:31601096:Brain Angular Gyrus;chr15:31588809:31660765:Fetal                                                                                                                                                                                                                                                  |
|         |        |      |           |         |         |            |              |      |  | Thymus;chr15:31590716:31599435:CD34 fetal;chr15:31611693:31675292:CD14;chr15:31613604:31699171:CD20;chr15:31615375:31658617:Ly3;c                                                                                                                                                                                              |
|         |        |      |           |         |         |            |              |      |  | hr15:31615488:31685063:Brain Hippocampus Middle                                                                                                                                                                                                                                                                                |
|         |        |      |           |         |         |            |              |      |  | 150;chr15:31615508:31660953:Tonsil;chr15:316156                                                                                                                                                                                                                                                                                |

|         |       |    |           |         |         |            |         |          |     |                                               |
|---------|-------|----|-----------|---------|---------|------------|---------|----------|-----|-----------------------------------------------|
| ASHG19  |       |    |           |         |         |            |         |          |     | chr15:6975                                    |
| SELNC2  |       |    |           | ENST00  |         |            |         |          |     | 0861-                                         |
| A100004 |       |    |           | 0005587 | noncodi | ENSG000002 | RP11-   |          |     | chr15:69735057:69762697:CD4 Memory Primary    |
| 612     | 2.087 | up | noncoding | 02      | ng      | 59215      | 253M7.4 | Reliable | 391 | 69754145:-7pool;chr15:69754181:69778076:LNCaP |

|         |        |      |           |         |         |            |           |          |     |  |  |  |            |  |                             |                                                |  |  |  |
|---------|--------|------|-----------|---------|---------|------------|-----------|----------|-----|--|--|--|------------|--|-----------------------------|------------------------------------------------|--|--|--|
| ASHG19  |        |      |           |         |         |            |           |          |     |  |  |  |            |  |                             |                                                |  |  |  |
| SELNC2  |        |      |           | ENST00  |         |            |           |          |     |  |  |  | chr13:4338 |  |                             |                                                |  |  |  |
| A100017 |        |      |           | 0006044 | noncodi | ENSG000002 |           |          |     |  |  |  | 4502-      |  |                             |                                                |  |  |  |
| 012     | 2.7933 | down | noncoding | 85      | ng      | 71216      | LINC01050 |          | 760 |  |  |  | 43386698:- |  | chr13:43377524:43424659:u87 |                                                |  |  |  |
| ASHG19  |        |      |           |         |         |            |           |          |     |  |  |  |            |  |                             | chr10:75384396:75417277:Fetal                  |  |  |  |
| SELNC2  |        |      |           | ENST00  |         |            |           |          |     |  |  |  |            |  |                             | Muscle;chr10:75384653:75417403:Skeletal        |  |  |  |
| A100016 |        |      |           | 0006094 | noncodi | ENSG000002 | RP11-     |          |     |  |  |  | chr10:7539 |  |                             | Muscle;chr10:75384884:75416695:Psoas           |  |  |  |
| 218     | 2.2835 | up   | noncoding | 34      | ng      | 72791      | 464F9.22  | Reliable | 935 |  |  |  | 0314-      |  |                             | Muscle;chr10:75403720:75417344:Left            |  |  |  |
|         |        |      |           |         |         |            |           |          |     |  |  |  | 75391248:+ |  |                             | Ventricle;chr10:75403902:75416581:Right Atrium |  |  |  |
|         |        |      |           |         |         |            |           |          |     |  |  |  |            |  |                             | chr17:16341332:16348323:HepG2;chr17:16344475:1 |  |  |  |
|         |        |      |           |         |         |            |           |          |     |  |  |  |            |  |                             | 6393335:Spleen;chr17:16345196:16424854:Fetal   |  |  |  |
|         |        |      |           |         |         |            |           |          |     |  |  |  |            |  |                             | Intestine Large;chr17:16345354:16395538:Small  |  |  |  |
|         |        |      |           |         |         |            |           |          |     |  |  |  |            |  |                             | Intestine;chr17:16346062:16393620:Adrenal      |  |  |  |
|         |        |      |           |         |         |            |           |          |     |  |  |  |            |  |                             | Gland;chr17:16346673:16395506:Colon Crypt      |  |  |  |
| ASHG19  |        |      |           |         |         |            |           |          |     |  |  |  |            |  |                             | chr17:1634                                     |  |  |  |
| SELNC2  |        |      |           | ENST00  |         |            |           |          |     |  |  |  |            |  |                             | 1;chr17:16348624:16395296:Fetal                |  |  |  |
| A100542 |        |      |           | 0004818 | noncodi | ENSG000001 | FAM211A-  |          |     |  |  |  |            |  |                             | Intestine;chr17:16363328:16370398:Colon Crypt  |  |  |  |
| 690     | 3.4093 | down | noncoding | 98      | ng      | 75061      | AS1       |          | 993 |  |  |  |            |  |                             | 2301-                                          |  |  |  |
|         |        |      |           |         |         |            |           |          |     |  |  |  |            |  |                             | 16345342:+                                     |  |  |  |
|         |        |      |           |         |         |            |           |          |     |  |  |  |            |  |                             | 2;chr17:16365702:16395445:Sigmoid Colon        |  |  |  |

ASHG19  
SELNC2  
A100288  
393

2.1325 down noncoding

ENST00  
0005090

noncodi  
ng ENSG000002

CTD-  
2035E11.3

Gold 472

chr5:43018 8pool;chr5:42989815:43020989:Spleen;chr5:4298993  
531- 1:43020950:Sigmoid  
43024349:+ Colon;chr5:42989941:43020943:Small

chr5:42974744:43010144:Astrocytes;chr5:42982003:  
43021566:CD4 Memory Primary  
7pool;chr5:42982072:43021311:CD34 Primary  
RO01536;chr5:42982188:43021349:CD8 Memory  
7pool;chr5:42982625:43009005:CD34  
adult;chr5:42982779:43008925:CD34  
fetal;chr5:42984005:43021232:HeLa;chr5:42984195:  
43020926:Esophagus;chr5:42984237:43021003:Oste  
oblasts;chr5:42984869:43020974:NHLF;chr5:429850  
69:43010090:VACO  
9m;chr5:42987481:42997335:CD8  
primiary;chr5:42988207:43021793:CD56;chr5:42988  
303:42997081:CD4p CD25- Il17- PMAstim  
Th;chr5:42988340:43022194:CD4p CD25-  
CD45ROp Memory;chr5:42988541:42996957:CD4p  
CD25- CD45RAp  
Naive;chr5:42988679:43021490:CD4 Naive Primary  
8pool;chr5:42988731:43021440:CD8 Naive  
8pool;chr5:42988739:43021396:CD8 Naive  
7pool;chr5:42988783:43021518:CD3;chr5:42988888:  
43021861:CD4p CD25- Il17p PMAstim  
Th17;chr5:42988915:43022042:Tonsil;chr5:4298894  
0:43021536:CD4p CD225int CD127p  
Tmem;chr5:42989202:42996790:HUVEC;chr5:42989  
365:42996520:CD20;chr5:42989548:43021294:CD4  
Naive Primary 7pool;chr5:42989568:43021469:CD4  
Memory Primary

|         |        |    |           |         |            |       |         |      |                                                                                                                                                                                                                                                                                                                                                                                                                                                                                                                                                                                                                                                                                                                                                                                                                                                   |
|---------|--------|----|-----------|---------|------------|-------|---------|------|---------------------------------------------------------------------------------------------------------------------------------------------------------------------------------------------------------------------------------------------------------------------------------------------------------------------------------------------------------------------------------------------------------------------------------------------------------------------------------------------------------------------------------------------------------------------------------------------------------------------------------------------------------------------------------------------------------------------------------------------------------------------------------------------------------------------------------------------------|
| ASHG19  |        |    |           |         |            |       |         |      | chr16:68212700:68272196:Thymus;chr16:68249856:68272392:Gastric;chr16:68261418:68272282:VACO400;chr16:68261815:68274246:Colon Crypt2;chr16:68262082:68272197:LNCaP;chr16:68265378:68274180:Colon Crypt3;chr16:68266153:68272416:Esophagus;chr16:68267165:68272241:VACO9m;chr16:68267481:68272278:Pancreas;chr16:68270515:68333501:RightAtrium;chr16:68270633:68335789:AdiposeNuclei;chr16:68270826:68307258:AdrenalGland;chr16:68271675:68292320:RightVentricle;chr16:68277977:68320878:MM1S;chr16:68278112:68323969:DHL6;chr16:68285503:68335472:CD20;chr16:68285736:68332888:Thymus;chr16:68285778:68325411:Tonsil;chr16:68291070:68305604:HepG2;chr16:68291072:68324941:SigmoidColon;chr16:68291183:68318135:Colon Crypt2;chr16:68296590:68326585:CD4p CD25-9872-CD45ROp Memory;chr16:68296946:68326806:CD8primiary;chr16:68302759:68326322:CD3 |
| SELNC2  |        |    | ENST00    |         |            |       |         |      | chr16:6825                                                                                                                                                                                                                                                                                                                                                                                                                                                                                                                                                                                                                                                                                                                                                                                                                                        |
| A100016 |        |    | 0005711   | noncodi | ENSG000002 | RP11- |         |      | 9872-                                                                                                                                                                                                                                                                                                                                                                                                                                                                                                                                                                                                                                                                                                                                                                                                                                             |
| 153     | 5.5613 | up | noncoding | 97      | ng         | 62160 | 96D1.11 | 3177 | 68263048:-                                                                                                                                                                                                                                                                                                                                                                                                                                                                                                                                                                                                                                                                                                                                                                                                                                        |

|         |        |    |           |         |            |       |          |              |                                                                                                                   |
|---------|--------|----|-----------|---------|------------|-------|----------|--------------|-------------------------------------------------------------------------------------------------------------------|
| ASHG19  |        |    |           |         |            |       |          |              | chr18:804720:842932:CD4 Memory Primary                                                                            |
| SELNC2  |        |    | ENST00    |         |            |       |          |              | chr18:8132                                                                                                        |
| A100016 |        |    | 0006101   | noncodi | ENSG000002 | RP11- |          |              | 75-                                                                                                               |
| 228     | 4.6678 | up | noncoding | 85      | ng         | 73355 | 672L10.6 | Reliable 483 | 813757:+                                                                                                          |
|         |        |    |           |         |            |       |          |              | 7pool;chr18:804957:817093:CD8 Memory7pool;chr18:807287:814934:CD4p CD25- II17-PMAstim Th;chr18:807552:842678:K562 |

|         |        |      |           |         |         |            |              |      |            |                                                 |
|---------|--------|------|-----------|---------|---------|------------|--------------|------|------------|-------------------------------------------------|
| ASHG19  |        |      |           |         |         |            |              |      |            | chr3:114003952:114058432:CD8                    |
| SELNC2  |        |      |           | ENST00  |         |            |              |      |            | primiary;chr3:114003955:114033752:CD4 Naive     |
| A100014 |        |      |           | 0005702 | noncodi | ENSG000002 |              |      |            | Primary 8pool;chr3:114003976:114054019:CD4p     |
| 588     | 2.4044 | down | noncoding | 69      | ng      | 59976      | RP11-553L6.5 | 1679 | -          | CD25- Il17- PMAstim                             |
|         |        |      |           |         |         |            |              |      | chr3:11403 | Th;chr3:114004013:114058398:Tonsil;chr3:1140040 |
|         |        |      |           |         |         |            |              |      | 3348-      | 21:114033604:CD8 Memory                         |
|         |        |      |           |         |         |            |              |      | 114035026: | 7pool;chr3:114004022:114028685:CD56;chr3:11400  |
|         |        |      |           |         |         |            |              |      | -          | 4096:114058306:CD3                              |

|         |        |    |           |         |         |            |            |          |     |                                               |
|---------|--------|----|-----------|---------|---------|------------|------------|----------|-----|-----------------------------------------------|
| ASHG19  |        |    |           |         |         |            |            |          |     |                                               |
| SELNC2  |        |    |           | ENST00  |         |            |            |          |     | chr4:75418                                    |
| A100013 |        |    |           | 0005104 | noncodi | ENSG000002 |            |          |     | 301-                                          |
| 735     | 3.1615 | up | noncoding | 19      | ng      | 49942      | AC142293.3 | Reliable | 732 | 75514664:-                                    |
|         |        |    |           |         |         |            |            |          |     | chr4:75452158:75493257:HMEC;chr4:75452163:754 |
|         |        |    |           |         |         |            |            |          |     | 92984:NHEK;chr4:75480189:75492733:VACO 400    |

|         |        |    |           |         |         |            |             |              |                                                      |
|---------|--------|----|-----------|---------|---------|------------|-------------|--------------|------------------------------------------------------|
| ASHG19  |        |    |           |         |         |            |             |              | chr4:12957                                           |
| SELNC2  |        |    |           | MICT00  |         |            |             |              | 4878-                                                |
| A100573 |        |    |           | 0002712 | noncodi | CATG000000 | CATG000000  |              | 129588472:                                           |
| 558     | 2.5192 | up | noncoding | 16      | ng      | 70175      | 70175.1     | 7096         | +                                                    |
|         |        |    |           |         |         |            |             |              | chr4:129578348:129598633:MM1S                        |
|         |        |    |           |         |         |            |             |              | chr17:73284104:73345918:HBL1;chr17:73287335:73       |
|         |        |    |           |         |         |            |             |              | 369120:Tonsil;chr17:73287754:73415375:CD14;chr1      |
|         |        |    |           |         |         |            |             |              | 7:73289760:73295202:CD19                             |
|         |        |    |           |         |         |            |             |              | Primary;chr17:73289805:73357070:Spleen;chr17:733     |
|         |        |    |           |         |         |            |             |              | 05109:73364292:CD34 Primary                          |
|         |        |    |           |         |         |            |             |              | RO01536;chr17:73307734:73368344:CD19                 |
|         |        |    |           |         |         |            |             |              | Primary;chr17:73317653:73362184:DND41;chr17:73       |
| ASHG19  |        |    |           | ENST00  |         |            |             |              | chr17:7339                                           |
| SELNC2  |        |    |           | 0005782 | noncodi | ENSG000002 |             |              | 321133:73403212:CD4p CD25- Il17- PMAstim             |
| A100015 |        |    |           | 0005782 | noncodi | ENSG000002 |             |              | 0204- Th;chr17:73324621:73349939:CD20;chr17:73349943 |
| 370     | 2.5393 | up | noncoding | 26      | ng      | 65342      | RP11-16C1.1 | Reliable 372 | 73391044;+ :73394321:CD20                            |
|         |        |    |           |         |         |            |             |              |                                                      |
| ASHG19  |        |    |           | ENST00  |         |            |             |              | chr1:11023                                           |
| SELNC2  |        |    |           | 0005625 | noncodi | ENSG000002 |             |              | 5739-                                                |
| A100006 |        |    |           | 0005625 | noncodi | ENSG000002 |             |              | 110236364:                                           |
| 113     | 2.2665 | up | noncoding | 38      | ng      | 60246      | AC000032.2  | Reliable 491 | - chr1:110221396:110276610:HCC1954                   |





|         |       |    |           |         |         |            |          |     |   |                                          |
|---------|-------|----|-----------|---------|---------|------------|----------|-----|---|------------------------------------------|
| ASHG19  |       |    |           |         |         |            |          |     |   | chr5:17376                               |
| SELNC2  |       |    |           | ENST00  |         |            |          |     |   | 3498-                                    |
| A100015 |       |    |           | 0005102 | noncodi | ENSG000002 | RP11-    |     |   | 173954048: chr5:173908514:173960764:NCI- |
| 202     | 2.005 | up | noncoding | 34      | ng      | 49306      | 267A15.1 | 844 | + | H69;chr5:173928928:173962818:VACO 503    |

|         |        |    |           |         |         |            |             |          |     |                                |
|---------|--------|----|-----------|---------|---------|------------|-------------|----------|-----|--------------------------------|
| ASHG19  |        |    |           |         |         |            |             |          |     | chr6:15570                     |
| SELNC2  |        |    |           | ENST00  |         |            |             |          |     | 1645-                          |
| A100004 |        |    |           | 0004535 | noncodi | ENSG000002 |             |          |     | 155702317:                     |
| 368     | 2.0074 | up | noncoding | 79      | ng      | 32529      | RP1-257I9.2 | Reliable | 554 | - chr6:155695399:155722912:u87 |

|         |        |      |           |         |         |            |          |  |     |                                       |
|---------|--------|------|-----------|---------|---------|------------|----------|--|-----|---------------------------------------|
| ASHG19  |        |      |           |         |         |            |          |  |     | chr1:59486                            |
| SELNC2  |        |      |           | ENST00  |         |            |          |  |     | 260-                                  |
| A100828 |        |      |           | 0004381 | noncodi | ENSG000002 | RP4-     |  |     | 59510286:+ chr1:59473624:59529508:u87 |
| 506     | 2.2218 | down | noncoding | 95      | ng      | 30812      | 794H19.4 |  | 306 |                                       |

|         |        |      |           |         |         |            |          |          |     |                                                 |
|---------|--------|------|-----------|---------|---------|------------|----------|----------|-----|-------------------------------------------------|
| ASHG19  |        |      |           |         |         |            |          |          |     | chr2:36648                                      |
| SELNC2  |        |      |           |         |         |            |          |          |     | 90-                                             |
| A101049 |        |      |           | uc002qy | noncodi | ENSG000001 |          |          |     | chr2:3651194:3704067:Ovary;chr2:3689523:3716270 |
| 578     | 3.3092 | down | noncoding | d.1     | ng      | 88765      | TMSB4XP2 | Reliable | 405 | 3665294:- :HBL1;chr2:3697967:3716182:Ly3        |

ASHG19  
 SELNC2 MICT00  
 A100024 0003692 noncodi CATG000001 CATG000001  
 822 3.0534 down noncoding 86 ng 10132 10132.1 9706

chr9:139375097:139380303:HeLa;chr9:139377011:1  
 39492039:Pancreatic  
 islets;chr9:139377687:139467997:Lung;chr9:139384  
 093:139525246:Colon Crypt  
 3;chr9:139387062:139501507:Brain Hippocampus  
 Middle;chr9:139387064:139447553:Brain Cingulate  
 Gyrus;chr9:139387407:139459693:Brain  
 Hippocampus Middle  
 150;chr9:139387413:139447503:Brain Anterior  
 Caudate;chr9:139402936:139468095:Right  
 Atrium;chr9:139403716:139442661:Left  
 Ventricle;chr9:139404221:139463290:Adipose  
 Nuclei;chr9:139404817:139464701:Sigmoid  
 Colon;chr9:139404844:139460044:Small  
 Intestine;chr9:139404943:139463564:Esophagus;chr9  
 :139405020:139447486:Brain Inferior Temporal  
 Lobe;chr9:139405028:139461453:Fetal  
 Muscle;chr9:139405239:139438180:Brain Angular  
 Gyrus;chr9:139407512:139445889:Colon Crypt  
 2;chr9:139412822:139442518:Colon Crypt  
 1;chr9:139412956:139460358:CD14;chr9:139413605  
 :139438320:VACO  
 400;chr9:139420117:139446243:HCT-  
 116;chr9:139420323:139471373:Stomach Smooth  
 Muscle;chr9:139420329:139463202:Gastric;chr9:139  
 420405:139453240:Pancreas;chr9:139420496:139446  
 chr9:13945 026:VACO 503;chr9:139420602:139461721:Adrenal  
 4744- Gland;chr9:139422133:139445956:LNCaP;chr9:1394  
 139482374: 23110:139447563:Tonsil;chr9:139430279:13944281  
 4:Spleen;chr9:139470097:139525295:H2171;chr9:13

|         |        |    |           |         |         |            |         |          |     |                                                   |
|---------|--------|----|-----------|---------|---------|------------|---------|----------|-----|---------------------------------------------------|
| ASHG19  |        |    |           |         |         |            |         |          |     |                                                   |
| SELNC2  |        |    |           | ENST00  |         |            |         |          |     | chr2:96960                                        |
| A100003 |        |    |           | 0006072 | noncodi | ENSG000002 | RP11-   |          |     | 28- chr2:9677223:9706542:HMEC;chr2:9678117:969776 |
| 179     | 4.2974 | up | noncoding | 41      | ng      | 71855      | 214N9.1 | Reliable | 877 | 9696904:+ 0:DHL6;chr2:9691786:9706213:NHEK        |

|         |        |      |           |         |         |            |          |  |     |                                     |
|---------|--------|------|-----------|---------|---------|------------|----------|--|-----|-------------------------------------|
| ASHG19  |        |      |           |         |         |            |          |  |     | chr11:1128                          |
| SELNC2  |        |      |           | ENST00  |         |            |          |  |     | 31050-                              |
| A100562 |        |      |           | 0005320 | noncodi | ENSG000002 | RP11-    |  |     | 112832021:                          |
| 079     | 2.7566 | down | noncoding | 02      | ng      | 47416      | 629G13.1 |  | 566 | - chr11:112801787:112849540:HSMtube |

|         |        |    |           |         |            |       |           |          |     |                                                  |
|---------|--------|----|-----------|---------|------------|-------|-----------|----------|-----|--------------------------------------------------|
| ASHG19  |        |    |           |         |            |       |           |          |     | chr15:39865186:39885963:NHDF-                    |
| SELNC2  |        |    | ENST00    |         |            |       |           |          |     | Ad;chr15:39865313:39892941:Osteoblasts;chr15:398 |
| A100017 |        |    | 0005607   | noncodi | ENSG000002 | CTD-  |           |          |     | 69915:39877299:IMR90;chr15:39869915:39888876:    |
| 623     | 2.5086 | up | noncoding | 69      | ng         | 59279 | 2033D15.1 | Reliable | 281 | HUVEC;chr15:39870628:39888468:HSMM;chr15:39      |
|         |        |    |           |         |            |       |           |          |     | 870701:39888468:Skeletal Muscle                  |
|         |        |    |           |         |            |       |           |          |     | Myoblast;chr15:39870728:39934231:Sigmoid         |
|         |        |    |           |         |            |       |           |          |     | Colon;chr15:39900509:39924276:CD56;chr15:39908   |
|         |        |    |           |         |            |       |           |          |     | chr15:3988                                       |
|         |        |    |           |         |            |       |           |          |     | 178:39935465:NHEK;chr15:39913693:39922988:CD     |
|         |        |    |           |         |            |       |           |          |     | 5781-                                            |
|         |        |    |           |         |            |       |           |          |     | 3;chr15:39914552:39937162:CD4p CD25- II17p       |
|         |        |    |           |         |            |       |           |          |     | 39886432:-                                       |
|         |        |    |           |         |            |       |           |          |     | PMAstim Th17                                     |

|         |        |    |           |         |            |       |           |          |     |                                                |
|---------|--------|----|-----------|---------|------------|-------|-----------|----------|-----|------------------------------------------------|
| ASHG19  |        |    |           |         |            |       |           |          |     | chr14:1024                                     |
| SELNC2  |        |    | ENST00    |         |            |       |           |          |     | 18753-                                         |
| A100011 |        |    | 0006071   | noncodi | ENSG000002 | RP11- |           |          |     | chr14:102413635:102440255:VACO                 |
| 591     | 2.7196 | up | noncoding | 22      | ng         | 72444 | 1017G21.6 | Reliable | 648 | 102419400: 503;chr14:102413638:102448327:NHDF- |
|         |        |    |           |         |            |       |           |          |     | +                                              |
|         |        |    |           |         |            |       |           |          |     | Ad;chr14:102413684:102439387:Colon Crypt 3     |

ASHG19  
 SELNC2  
 A100013  
 654 2.1714 down noncoding 19 ng 41135 LINC00881

ENST00  
 0004717 noncodi ENSG000002

791

chr3:15680  
 7670-  
 156818924:  
 +  
 chr3:15680503;chr3:156836974:156855523:Sigmoid  
 Colon;chr3:156837068:156855821:HepG2;chr3:1568  
 37190:156855546:Small  
 Intestine;chr3:156837212:156855183:Colon Crypt

chr3:156780855:156808485:Brain hippocampus  
 Middle 150;chr3:156781155:156808652:Brain  
 Anterior Caudate;chr3:156781701:156822304:Brain  
 Cingulate Gyrus;chr3:156781703:156809508:Brain  
 Hippocampus  
 Middle;chr3:156782059:156809879:Brain Inferior  
 Temporal  
 Lobe;chr3:156783670:156817525:Osteoblasts;chr3:1  
 56784215:156808538:Brain Angular  
 Gyrus;chr3:156794674:156855343:Right  
 Atrium;chr3:156795252:156825935:MM1S;chr3:156  
 798403:156807714:HMEC;chr3:156798626:1568533  
 89:CD4 Memory Primary  
 7pool;chr3:156798763:156808423:NHEK;chr3:15680  
 2888:156855556:Left  
 Ventricle;chr3:156802993:156855459:Lung;chr3:156  
 803058:156831056:Right  
 Ventricle;chr3:156803413:156809144:Fetal  
 Muscle;chr3:156804380:156826978:Ly4;chr3:156804  
 477:156811628:Fetal Intestine  
 Large;chr3:156804608:156808840:Fetal  
 Intestine;chr3:156804660:156822268:Small  
 Intestine;chr3:156804954:156823499:Sigmoid  
 Colon;chr3:156832630:156855726:Fetal Intestine  
 Large;chr3:156832745:156855695:Fetal  
 Intestine;chr3:156833836:156855198:VACO

|         |        |      |           |  |         |         |            |             |          |     |                                                                                                                                                                                                                                                                                                                                                                                                                                                                                                                                                                   |
|---------|--------|------|-----------|--|---------|---------|------------|-------------|----------|-----|-------------------------------------------------------------------------------------------------------------------------------------------------------------------------------------------------------------------------------------------------------------------------------------------------------------------------------------------------------------------------------------------------------------------------------------------------------------------------------------------------------------------------------------------------------------------|
| ASHG19  |        |      |           |  | ENST00  |         |            |             |          |     | chr19:1747                                                                                                                                                                                                                                                                                                                                                                                                                                                                                                                                                        |
| SELNC2  |        |      |           |  | 0005975 | noncodi | ENSG000002 | CTD-        |          |     | 1741-                                                                                                                                                                                                                                                                                                                                                                                                                                                                                                                                                             |
| A100012 |        |      |           |  | 92      | ng      | 69350      | 2278110.1   | Reliable | 661 | 17473562:+ chr19:17457576:17524836:Spleen                                                                                                                                                                                                                                                                                                                                                                                                                                                                                                                         |
|         | 2.3729 | up   | noncoding |  |         |         |            |             |          |     |                                                                                                                                                                                                                                                                                                                                                                                                                                                                                                                                                                   |
|         |        |      |           |  |         |         |            |             |          |     | chr16:987327:1043016:Brain Hippocampus<br>Middle;chr16:987380:1042968:Brain Cingulate<br>Gyrus;chr16:987581:1042744:Brain Hippocampus<br>Middle 150;chr16:1001178:1042456:Brain Anterior<br>Caudate;chr16:1013186:1042763:Brain Inferior<br>Temporal Lobe;chr16:1014623:1041623:Brain<br>Angular Gyrus;chr16:1022902:1041491:Brain Mid<br>Frontal Lobe                                                                                                                                                                                                            |
| ASHG19  |        |      |           |  | ENST00  |         |            |             |          |     | chr16:1041                                                                                                                                                                                                                                                                                                                                                                                                                                                                                                                                                        |
| SELNC2  |        |      |           |  | 0005999 | noncodi | ENSG000002 | RP11-       |          |     | 148-                                                                                                                                                                                                                                                                                                                                                                                                                                                                                                                                                              |
| A100200 |        |      |           |  | 46      | ng      | 60496      | 161M6.3     |          | 984 | 1050926:-                                                                                                                                                                                                                                                                                                                                                                                                                                                                                                                                                         |
|         | 2.4072 | down | noncoding |  |         |         |            |             |          |     |                                                                                                                                                                                                                                                                                                                                                                                                                                                                                                                                                                   |
|         |        |      |           |  |         |         |            |             |          |     | chr1:90277508:90410092:CD14;chr1:90284891:9032<br>2643:CD4 Memory Primary<br>7pool;chr1:90285072:90310876:Brain Hippocampus<br>Middle 150;chr1:90285126:90311060:Brain Inferior<br>Temporal Lobe;chr1:90285395:90314172:Brain<br>Cingulate<br>Gyrus;chr1:90307860:90337707:Tonsil;chr1:9030798<br>0:90378248:Osteoblasts;chr1:90335992:90376985:C<br>D4 Memory Primary<br>7pool;chr1:90338335:90385797:CD34 Primary<br>RO01536;chr1:90342913:90374716:CD8 Memory<br>7pool;chr1:90343713:90375012:K562;chr1:90348830<br>:90376992:HUVEC;chr1:90358848:90419578:HSM |
| ASHG19  |        |      |           |  | ENST00  |         |            |             |          |     | chr1:90285                                                                                                                                                                                                                                                                                                                                                                                                                                                                                                                                                        |
| SELNC2  |        |      |           |  | 0006091 | noncodi | ENSG000002 | RP5-943J3.2 |          |     | 733-                                                                                                                                                                                                                                                                                                                                                                                                                                                                                                                                                              |
| A100004 |        |      |           |  | 94      | ng      | 72931      | RP5-943J3.2 | Reliable | 695 | 90286427:-                                                                                                                                                                                                                                                                                                                                                                                                                                                                                                                                                        |
|         | 2.4729 | up   | noncoding |  |         |         |            |             |          |     | chr1:90362136:90372507:CD34<br>fetal;chr1:90369156:90423654:Brain Anterior<br>Caudate;chr1:90371516:90379707:H1                                                                                                                                                                                                                                                                                                                                                                                                                                                   |

|         |        |      |           |         |         |            |           |          |      |  |  |            |                                                  |
|---------|--------|------|-----------|---------|---------|------------|-----------|----------|------|--|--|------------|--------------------------------------------------|
| ASHG19  |        |      |           |         |         |            |           |          |      |  |  |            |                                                  |
| SELNC2  |        |      |           | ENST00  |         |            |           |          |      |  |  | chr3:44039 |                                                  |
| A100007 |        |      |           | 0006062 | noncodi | ENSG000002 | RP4-      |          |      |  |  | 573-       |                                                  |
| 725     | 2.9474 | down | noncoding | 17      | ng      | 72121      | 555D20.4  | Reliable | 1069 |  |  | 44040641:- | chr3:44036029:44064886:u87                       |
|         |        |      |           |         |         |            |           |          |      |  |  |            | chr2:74152837:74230505:CD4p CD25- II17-          |
|         |        |      |           |         |         |            |           |          |      |  |  |            | PMastim                                          |
|         |        |      |           |         |         |            |           |          |      |  |  |            | Th;chr2:74190932:74215041:Gastric;chr2:74195960: |
|         |        |      |           |         |         |            |           |          |      |  |  |            | 74284592:CD14;chr2:74197681:74238940:Esophagu    |
|         |        |      |           |         |         |            |           |          |      |  |  |            | s;chr2:74197864:74215272:Colon Crypt             |
|         |        |      |           |         |         |            |           |          |      |  |  |            | 3;chr2:74197915:74227390:Colon Crypt             |
|         |        |      |           |         |         |            |           |          |      |  |  |            | 2;chr2:74210450:74213656:VACO                    |
|         |        |      |           |         |         |            |           |          |      |  |  |            | 400;chr2:74210530:74213466:VACO                  |
| ASHG19  |        |      |           |         |         |            |           |          |      |  |  |            |                                                  |
| SELNC2  |        |      |           | ENST00  |         |            |           |          |      |  |  | chr2:74185 | 9m;chr2:74243858:74266802:Ly3;chr2:74252781:74   |
| A101016 |        |      |           | 0004391 | noncodi | ENSG000002 |           |          |      |  |  | 097-       | 264602:CD34 adult;chr2:74253093:74263447:CD34    |
| 732     | 2.1241 | up   | noncoding | 92      | ng      | 37883      | DGUOK-AS1 |          | 563  |  |  | 74208560:- | fetal                                            |



|         |        |    |           |         |            |       |             |          |                                                                                                                                                                                                                                                                                              |                                                                                   |
|---------|--------|----|-----------|---------|------------|-------|-------------|----------|----------------------------------------------------------------------------------------------------------------------------------------------------------------------------------------------------------------------------------------------------------------------------------------------|-----------------------------------------------------------------------------------|
| ASHG19  |        |    |           |         |            |       |             |          | chr19:54921528:54950915:Brain Inferior Temporal Lobe;chr19:54925536:54963097:Brain Hippocampus Middle;chr19:54925733:54963082:Brain Cingulate Gyrus;chr19:54925765:54950647:Brain Hippocampus Middle                                                                                         |                                                                                   |
| SELNC2  |        |    | ENST00    |         |            |       |             |          | 150;chr19:54926568:54951103:Brain Anterior Caudate;chr19:54926765:54947982:Brain Angular Gyrus;chr19:54929083:54947767:Brain Mid Frontal Lobe;chr19:54929167:54983116:Pancreas;chr19:54929167:54983278:Pancreatic islets;chr19:54962054:54983242:Gastric;chr19:54962064:54983154:Colon Crypt |                                                                                   |
| A100001 |        |    | 0005993   | noncodi | ENSG000002 |       |             |          | 1;chr19:54962449:54981338:LNCaP;chr19:54970662:54983351:Small Intestine;chr19:54970705:54983132:Spleen;chr19:54970768:54983186:Sigmoid Colon;chr19:54971335:54983117:Colon Crypt                                                                                                             |                                                                                   |
| 560     | 2.2907 | up | noncoding | 82      | ng         | 67838 | AC008746.12 | Reliable | 516                                                                                                                                                                                                                                                                                          | 2;chr19:54971393:54983161:Colon Crypt                                             |
|         |        |    |           |         |            |       |             |          |                                                                                                                                                                                                                                                                                              | 3;chr19:54972271:54983227:Fetal Intestine;chr19:54972299:54983257:Fetal Intestine |
|         |        |    |           |         |            |       |             |          |                                                                                                                                                                                                                                                                                              | 54950362:- Large                                                                  |

|         |        |    |           |         |            |       |          |  |     |                                                     |
|---------|--------|----|-----------|---------|------------|-------|----------|--|-----|-----------------------------------------------------|
| ASHG19  |        |    |           |         |            |       |          |  |     |                                                     |
| SELNC2  |        |    | ENST00    |         |            |       |          |  |     | chr2:61710                                          |
| A101029 |        |    | 0006054   | noncodi | ENSG000002 | RP11- |          |  |     | 508- chr2:61645792:61699770:DHL6;chr2:61684686:6172 |
| 045     | 2.4916 | up | noncoding | 37      | ng         | 70820 | 355B11.2 |  | 569 | 61711076:+ 1814:CD34 Primary RO01536                |

ASHG19  
 SELNC2  
 A100008  
 485 2.2805 up noncoding 10 ng 72384 44N11.2 Reliable 860

ENST00  
 0006077 noncodi ENSG000002 RP11-

chr8:123791599:123812517:CD4p CD25- CD45ROp  
 Memory;chr8:123791640:123810189:Brain  
 Hippocampus  
 Middle;chr8:123791657:123796406:CD56;chr8:1237  
 91698:123811809:Tonsil;chr8:123791740:12381314  
 7:CD4p CD25- CD45RAp  
 Naive;chr8:123791830:123872108:Brain Cingulate  
 Gyrus;chr8:123791831:123812706:CD8 Naive  
 8pool;chr8:123791885:123796448:CD8 Memory  
 7pool;chr8:123791897:123822383:CD19  
 Primary;chr8:123791903:123812493:CD8  
 primariy;chr8:123791925:123872233:Brain  
 Hippocampus Middle  
 150;chr8:123791951:123877195:Left  
 Ventricle;chr8:123791991:123876684:Psoas  
 Muscle;chr8:123792006:123816260:Brain Inferior  
 Temporal Lobe;chr8:123792022:123796317:CD4p  
 CD225int CD127p  
 Tmem;chr8:123792030:123796609:CD4p CD25-  
 Il17p PMAstim  
 Th17;chr8:123792055:123812548:CD4 Naive  
 Primary 8pool;chr8:123792091:123796339:CD4  
 Memory Primary  
 8pool;chr8:123792116:123796311:CD4 Naive  
 chr8:12379 2210- Naive  
 123793069: 7pool;chr8:123792157:123842563:Esophagus;chr8:1  
 23792221:123796154:CD3;chr8:123792234:1238754

|         |        |      |           |         |         |            |              |          |      |            |  |                                           |                                                 |
|---------|--------|------|-----------|---------|---------|------------|--------------|----------|------|------------|--|-------------------------------------------|-------------------------------------------------|
| ASHG19  |        |      |           |         |         |            |              |          |      |            |  |                                           | chr6:1381610:1408672:Esophagus;chr6:1381779:141 |
| SELNC2  |        |      |           | ENST00  |         |            |              |          |      | chr6:13840 |  | 9324:Sigmoid                              |                                                 |
| A100016 |        |      |           | 0005682 | noncodi | ENSG000002 |              |          |      | 25-        |  | Colon;chr6:1381898:1397393:Stomach Smooth |                                                 |
| 948     | 2.2435 | down | noncoding | 44      | ng      | 61730      | RP4-668J24.2 | Reliable | 1277 | 1385301:-  |  | Muscle;chr6:1382269:1397250:NHLF          |                                                 |

|         |        |    |           |         |         |            |         |      |   |                                                                                                                                                                                                                                                                                                                                                                                                  |
|---------|--------|----|-----------|---------|---------|------------|---------|------|---|--------------------------------------------------------------------------------------------------------------------------------------------------------------------------------------------------------------------------------------------------------------------------------------------------------------------------------------------------------------------------------------------------|
| ASHG19  |        |    |           |         |         |            |         |      |   | chr1:201494568:201532965:u87;chr1:201498845:201533209:NHDF-                                                                                                                                                                                                                                                                                                                                      |
| SELNC2  |        |    |           | ENST00  |         |            |         |      |   | Ad;chr1:201499023:201579537:HSMMtube;chr1:201499254:201569312:Brain Inferior Temporal Lobe;chr1:201499296:201578800:Osteoblasts;chr1:201499466:201554633:Brain Hippocampus Middle;chr1:201499539:201554513:Brain Cingulate Gyrus;chr1:201499826:201533160:Skeletal Muscle Myoblast;chr1:201499826:201533164:HSMM;chr1:201499829:201533172:NHLF;chr1:201499897:201554112:Brain Hippocampus Middle |
| A100000 |        |    |           | 0004419 | noncodi | ENSG000002 |         |      |   | 150;chr1:201499897:201584056:Pancreatic islets;chr1:201499964:201540850:Brain Angular Gyrus;chr1:201500984:201535523:Brain Mid Frontal Lobe;chr1:201505191:201533031:Astrocytes;chr1:201506512:201554222:Brain Anterior Caudate                                                                                                                                                                  |
| 280     | 4.1779 | up | noncoding | 32      | ng      | 23396      | RPS10P7 | 2329 | + |                                                                                                                                                                                                                                                                                                                                                                                                  |

|         |        |      |           |         |         |            |            |      |            |                                     |
|---------|--------|------|-----------|---------|---------|------------|------------|------|------------|-------------------------------------|
| ASHG19  |        |      |           |         |         |            |            |      |            |                                     |
| SELNC2  |        |      |           | ENCT00  |         |            |            |      |            | chr18:2004                          |
| A100001 |        |      |           | 0001912 | noncodi | CATG000000 | CATG000000 |      |            | 6289- chr18:20028365:20084909:Right |
| 633     | 7.3162 | down | noncoding | 43      | ng      | 35279      | 35279.1    | 1077 | 20047365:+ | Atrium;chr18:20045383:20051165:NHEK |

ASHG19  
 SELNC2  
 A100013  
 815 3.9454 up noncoding 79 ng 58837 CTD-2566J3.1 Reliable 537

chr14:68555475:68614521:Fetal  
 Muscle;chr14:68577448:68642169:Fetal Intestine  
 Large;chr14:68590700:68614976:Osteoblasts;chr14:68591170:68615328:HSMMtube;chr14:68591341:68737027:Stomach Smooth  
 Muscle;chr14:68591365:68615072:HSMM;chr14:68591472:68614275:Duodenum Smooth  
 Muscle;chr14:68591506:68615055:Skeletal Muscle Myoblast;chr14:68591560:68625251:u87;chr14:68591577:68625555:NHDF-  
 Ad;chr14:68591622:68625859:NHEK;chr14:68591661:68625836:HMEC;chr14:68603422:68723615:HCC1954;chr14:68657764:68719730:Duodenum Smooth  
 Muscle;chr14:68657799:68776455:Fetal Muscle;chr14:68665359:68776268:Fetal  
 Thymus;chr14:68696698:68731840:Fetal Intestine;chr14:68696948:68718223:HSMMtube;chr14:68697493:68731429:Fetal Intestine  
 Large;chr14:68697803:68809598:Tonsil;chr14:68713947:68800771:HBL1;chr14:68714257:68809954:CD20;chr14:68714552:68809686:GM12878;chr14:68714591:68775012:Ly1;chr14:68714763:68780763:Ly4;chr14:68715210:68761544:CD19  
 Primary;chr14:68716778:68753049:Ly3;chr14:68732305:68761095:DHL6;chr14:68732586:68762984:Toledo;chr14:68732676:68760612:CD56;chr14:68745751:68777072:VACO  
 chr14:6859400;chr14:68793306:68884369:Fetal  
 1721- Muscle;chr14:68813249:68847179:VACO  
 68596913:- 400;chr14:68815660:68880386:Fetal

|         |        |      |           |         |         |            |          |          |     |                                                                                          |
|---------|--------|------|-----------|---------|---------|------------|----------|----------|-----|------------------------------------------------------------------------------------------|
| ASHG19  |        |      |           |         |         |            |          |          |     | chr12:62994321:62999146:Toledo;chr12:62994460:62999610:CD20;chr12:62995209:62999729:CD4p |
| SELNC2  |        |      |           | ENST00  |         |            |          |          |     | chr12:6299                                                                               |
| A100009 |        |      |           | 0005502 | noncodi | ENSG000002 | RP11-    |          |     | 6532- CD25- CD45ROp                                                                      |
| 129     | 6.3739 | down | noncoding | 90      | ng      | 57354      | 631N16.2 | Reliable | 555 | 63007855:+ Memory;chr12:62995321:62999251:Fetal                                          |
|         |        |      |           |         |         |            |          |          |     | Muscle;chr12:62995364:62999232:CD56                                                      |

|         |        |      |           |         |         |            |              |  |     |                                                                                              |
|---------|--------|------|-----------|---------|---------|------------|--------------|--|-----|----------------------------------------------------------------------------------------------|
| ASHG19  |        |      |           |         |         |            |              |  |     | chr20:19680519:19716860:Ly4;chr20:19713677:19767915:H2171;chr20:19715694:19742104:Esophagus; |
| SELNC2  |        |      |           | ENST00  |         |            |              |  |     | chr20:1973                                                                                   |
| A100463 |        |      |           | 0004125 | noncodi | ENSG000002 | RP1-122P22.2 |  |     | 8792- Ventricle;chr20:19737283:19767891:Lung;chr20:197                                       |
| 180     | 5.5005 | down | noncoding | 71      | ng      | 33895      | RP1-122P22.2 |  | 415 | 19789926:+ 82303:19821568:HUVEC                                                              |
|         |        |      |           |         |         |            |              |  |     | 3;chr20:19737239:19768983:HSMMtube;chr20:1973                                                |

|         |        |    |           |         |            |       |           |          |     |  |            |                                             |
|---------|--------|----|-----------|---------|------------|-------|-----------|----------|-----|--|------------|---------------------------------------------|
| ASHG19  |        |    |           |         |            |       |           |          |     |  | chr2:87777 | 52153:87850421:CD4 Memory Primary           |
| SELNC2  |        |    | ENST00    |         |            |       |           |          |     |  | 014-       | 7pool;chr2:87752715:87844316:CD34 Primary   |
| A100010 |        |    | 0006081   | noncodi | ENSG000002 | RP11- |           |          |     |  | 87777553:- | RO01536;chr2:87752926:87769391:CD34 Primary |
| 820     | 3.4083 | up | noncoding | 42      | ng         | 73445 | 1399P15.1 | Reliable | 540 |  |            |                                             |

chr2:87741939:87835062:CD4p CD25- Il17-  
 PMAstim Th;chr2:87741939:87838628:CD8  
 primary;chr2:87741950:87835062:Sigmoid  
 Colon;chr2:87742030:87838478:CD56;chr2:8774208  
 6:87799484:MM1S;chr2:87742118:87849039:CD3;c  
 hr2:87742123:87839551:Small  
 Intestine;chr2:87742227:87849883:CD4p CD25-  
 Il17p PMAstim  
 Th17;chr2:87742275:87840521:Spleen;chr2:8774406  
 2:87770117:u87;chr2:87744157:87814392:HSMMtu  
 be;chr2:87744465:87770062:HSMM;chr2:87744472:  
 87812291:IMR90;chr2:87744542:87769924:Skeletal  
 Muscle  
 Myoblast;chr2:87744557:87803367:HUVEC;chr2:87  
 744763:87759323:HMEC;chr2:87744766:87860202:  
 Osteoblasts;chr2:87744785:87808232:NHLF;chr2:87  
 744801:87809293:Astrocytes;chr2:87744806:877977  
 83:HeLa;chr2:87744891:87840736:CD14;chr2:87744  
 961:87767255:NHEK;chr2:87748585:87770601:NH  
 DF-  
 Ad;chr2:87750583:87769736:Aorta;chr2:87750709:8  
 7815611:Pancl;chr2:87751176:87822848:Duodenum  
 Smooth Muscle;chr2:87751194:87819799:Adipose  
 Nuclei;chr2:87751406:87769489:Fetal  
 Muscle;chr2:87751432:87798788:Lung;chr2:8775155  
 9:87835511:Skeletal  
 Muscle;chr2:87751577:87798947:HCC1954;chr2:877

|         |        |    |           |         |            |       |          |      |     |                                                  |
|---------|--------|----|-----------|---------|------------|-------|----------|------|-----|--------------------------------------------------|
| ASHG19  |        |    |           |         |            |       |          |      |     | chr11:71101232:71132644:Jurkat;chr11:71128818:71 |
| SELNC2  |        |    | ENST00    |         |            |       |          |      |     | chr11:7115 177079:Brain Cingulate                |
| A100013 |        |    | 0005293   | noncodi | ENSG000002 | RP11- |          |      |     | 9720- Gyrus;chr11:71143042:71176809:Brain        |
| 006     | 2.2141 | up | noncoding | 69      | ng         | 54682 | 660L16.2 | Gold | 680 | 71163203:+ Hippocampus Middle                    |



|         |        |    |           |         |         |            |             |          |     |                                                                                                                                                                                                                                                                                                                                                                                                                                                  |
|---------|--------|----|-----------|---------|---------|------------|-------------|----------|-----|--------------------------------------------------------------------------------------------------------------------------------------------------------------------------------------------------------------------------------------------------------------------------------------------------------------------------------------------------------------------------------------------------------------------------------------------------|
| ASHG19  |        |    |           |         |         |            |             |          |     | chr17:36841485:36864155:Spleen;chr17:3684954:36863638:Left                                                                                                                                                                                                                                                                                                                                                                                       |
| SELNC2  |        |    |           | ENST00  |         |            |             |          |     | Ventricle;chr17:36849416:36867442:Fetal                                                                                                                                                                                                                                                                                                                                                                                                          |
| A100008 |        |    |           | 0005834 | noncodi | ENSG000002 |             |          |     | Muscle;chr17:36849427:36868217:Lung;chr17:36849443:36863581:Small                                                                                                                                                                                                                                                                                                                                                                                |
| 449     | 3.5274 | up | noncoding | 09      | ng      | 66040      | CTB-58E17.3 | Reliable | 486 | Intestine;chr17:36849446:36869721:Right                                                                                                                                                                                                                                                                                                                                                                                                          |
|         |        |    |           |         |         |            |             |          |     | Atrium;chr17:36849486:36864348:Sigmoid                                                                                                                                                                                                                                                                                                                                                                                                           |
|         |        |    |           |         |         |            |             |          |     | Colon;chr17:36849658:36862895:Right                                                                                                                                                                                                                                                                                                                                                                                                              |
|         |        |    |           |         |         |            |             |          |     | Ventricle;chr17:36849707:36864129:Gastric;chr17:36852020:36863435:MM1S;chr17:36852687:36863936:Tonsil;chr17:36854835:36891315:CD4p CD25-Il17p PMAstim                                                                                                                                                                                                                                                                                            |
|         |        |    |           |         |         |            |             |          |     | Th17;chr17:36854933:36891548:CD4p CD25- Il17-PMAstim                                                                                                                                                                                                                                                                                                                                                                                             |
|         |        |    |           |         |         |            |             |          |     | Th;chr17:36856374:36863732:Ly3;chr17:36856433:36863910:CD56;chr17:36856888:36888783:CD8 primary;chr17:36857029:36864323:Pancreatic islets;chr17:36857157:36863577:Esophagus;chr17:36857165:36863536:Adrenal                                                                                                                                                                                                                                      |
|         |        |    |           |         |         |            |             |          |     | Gland;chr17:36857173:36861522:K562;chr17:36857186:36861774:HeLa;chr17:36857283:36862851:Pancreas;chr17:36857283:36862900:VACO 9m;chr17:36857336:36862962:Thymus;chr17:36857431:36876540:VACO 503;chr17:36880595:36907474:Gastric;chr17:36880935:36900163:Colon Crypt 2;chr17:36881475:36907782:Small Intestine;chr17:36881476:36907973:Colon Crypt 1;chr17:36883977:36907951:Lung;chr17:36886485:36906657:Pancreas;chr17:36886615:36890751:LNCaP |

|         |        |    |           |         |         |            |          |          |     |                                                         |
|---------|--------|----|-----------|---------|---------|------------|----------|----------|-----|---------------------------------------------------------|
| ASHG19  |        |    |           |         |         |            |          |          |     | chr7:99364                                              |
| SELNC2  |        |    |           | ENST00  |         |            |          |          |     | 166- chr7:99317323:99393672:Fetal Intestine             |
| A100016 |        |    |           | 0006083 | noncodi | ENSG000002 | RP11-    |          |     | 99364515:+ Large;chr7:99317435:99393579:Fetal Intestine |
| 225     | 2.1807 | up | noncoding | 97      | ng      | 73407      | 757A13.1 | Reliable | 350 |                                                         |

|         |        |    |           |         |         |            |         |     |   |                               |
|---------|--------|----|-----------|---------|---------|------------|---------|-----|---|-------------------------------|
| ASHG19  |        |    |           |         |         |            |         |     |   | chr3:14271                    |
| SELNC2  |        |    |           | ENST00  |         |            |         |     |   | 9749-                         |
| A100016 |        |    |           | 0005979 | noncodi | ENSG000002 | RP11-   |     |   | 142720309:                    |
| 997     | 2.6999 | up | noncoding | 53      | ng      | 68129      | 91G21.1 | 561 | - | chr3:142716077:142722234:K562 |

|         |       |      |           |         |         |            |          |      |            |                                                  |
|---------|-------|------|-----------|---------|---------|------------|----------|------|------------|--------------------------------------------------|
|         |       |      |           |         |         |            |          |      |            | chr3:112317092:112416252:Osteoblasts;chr3:112323 |
|         |       |      |           |         |         |            |          |      |            | 193:112377100:u87;chr3:112344841:112374149:Adi   |
|         |       |      |           |         |         |            |          |      |            | pose Nuclei;chr3:112346174:112374310:Duodenum    |
|         |       |      |           |         |         |            |          |      |            | Smooth                                           |
|         |       |      |           |         |         |            |          |      |            | Muscle;chr3:112347706:112375700:HSMMtube;chr3    |
|         |       |      |           |         |         |            |          |      |            | :112350638:112375251:NHDF-                       |
| ASHG19  |       |      |           |         |         |            |          |      | chr3:11231 | Ad;chr3:112353228:112374918:IMR90;chr3:112353    |
| SELNC2  |       |      |           | ENST00  |         |            |          |      | 5641-      | 537:112375297:NHLF;chr3:112353786:112375136:     |
| A100009 |       |      |           | 0006101 | noncodi | ENSG000002 | RP11-    |      | 112320749: | Astrocytes;chr3:112354527:112375302:HSMM;chr3:   |
| 252     | 2.324 | down | noncoding | 03      | ng      | 72761      | 572C15.6 | 5109 | -          | 112356164:112375299:Skeletal Muscle Myoblast     |



|         |        |    |           |         |         |            |            |      |  |                                                           |
|---------|--------|----|-----------|---------|---------|------------|------------|------|--|-----------------------------------------------------------|
| ASHG19  |        |    |           |         |         |            |            |      |  |                                                           |
| SELNC2  |        |    |           | ENST00  |         |            |            |      |  | chr3:24535                                                |
| A100735 |        |    |           | 0004323 | noncodi | ENSG000002 |            |      |  | 578- chr3:24522776:24567093:Fetal Intestine               |
| 568     | 3.5021 | up | noncoding | 68      | ng      | 28791      | THRB-AS1   | 1216 |  | 24541833:+ Large;chr3:24522920:24548330:Fetal Intestine   |
|         |        |    |           |         |         |            |            |      |  | chr5:148494011:148524070:VACO                             |
|         |        |    |           |         |         |            |            |      |  | 503;chr5:148509370:148604667:Right                        |
|         |        |    |           |         |         |            |            |      |  | Atrium;chr5:148509613:148609765:Left                      |
|         |        |    |           |         |         |            |            |      |  | Ventricle;chr5:148512508:148556019:u87;chr5:1485          |
|         |        |    |           |         |         |            |            |      |  | 12944:148610042:Adipose                                   |
| ASHG19  |        |    |           |         |         |            |            |      |  | chr5:14850 Nuclei;chr5:148513084:148566045:HSMMtube;chr5: |
| SELNC2  |        |    |           | MICT00  |         |            |            |      |  | 5082- 148513364:148558772:Lung;chr5:148578617:14861       |
| A100007 |        |    |           | 0002911 | noncodi | CATG000000 | CATG000000 |      |  | 148509583: 6086:HSMMtube;chr5:148582893:148601148:NHLF    |
| 046     | 2.3699 | up | noncoding | 41      | ng      | 78011      | 78011.1    | 1083 |  | + ;chr5:148583745:148601508:IMR90                         |

|         |        |      |           |         |         |            |           |     |  |            |                                                 |
|---------|--------|------|-----------|---------|---------|------------|-----------|-----|--|------------|-------------------------------------------------|
| ASHG19  |        |      |           |         |         |            |           |     |  |            | chr5:52278686:52341416:u87;chr5:52279203:523416 |
| SELNC2  |        |      |           | ENST00  |         |            |           |     |  |            | 14:HUVEC;chr5:52280156:52305573:NHEK;chr5:52    |
| A101601 |        |      |           | 0005057 | noncodi | ENSG000002 | CTD-      |     |  | chr5:52228 | EC;chr5:52283967:52328432:Brain Hippocampus     |
| 719     | 2.5271 | down | noncoding | 01      | ng      | 49899      | 2175A23.1 | 595 |  | 249-       | Middle 150;chr5:52284029:52334970:Brain         |
|         |        |      |           |         |         |            |           |     |  | 52286108:- | Cingulate Gyrus;chr5:52318977:52336406:NHEK     |



|         |        |    |           |         |         |            |          |          |     |                                                          |
|---------|--------|----|-----------|---------|---------|------------|----------|----------|-----|----------------------------------------------------------|
| ASHG19  |        |    |           |         |         |            |          |          |     | chr6:151323859:151393377:HUVEC;chr6:15132480             |
| SELNC2  |        |    |           | ENST00  |         |            |          |          |     | 7:151397937:HSMtube;chr6:151325157:15141834              |
| A100002 |        |    |           | 0004458 | noncodi | ENSG000002 | RP1-     |          |     | 2:HCT-                                                   |
| 836     | 2.4313 | up | noncoding | 33      | ng      | 32290      | 292B18.3 | Reliable | 396 | chr6:15137392804:u87;chr6:151356767:151403524:HMEC;chr6  |
|         |        |    |           |         |         |            |          |          |     | 6033-:151361391:151393112:Panc1;chr6:151380439:1513      |
|         |        |    |           |         |         |            |          |          |     | 151377193:97528:Skeletal Muscle                          |
|         |        |    |           |         |         |            |          |          |     | - Myoblast;chr6:151380439:151397540:HSM                  |
|         |        |    |           |         |         |            |          |          |     |                                                          |
|         |        |    |           |         |         |            |          |          |     | chr6:137957798:138068513:DND41;chr6:137999688            |
| ASHG19  |        |    |           | ENST00  |         |            |          |          |     | :138039938:CD4p CD25- Il17p PMAstim                      |
| SELNC2  |        |    |           | 0004403 | noncodi | ENSG000002 | RP11-    |          |     | Th17;chr6:138018230:138068482:Fetal                      |
| A100003 |        |    |           | 0004403 | noncodi | ENSG000002 | RP11-    |          |     | Thymus;chr6:138019585:138066867:Jurkat;chr6:138          |
| 622     | 5.754  | up | noncoding | 97      | ng      | 30533      | 95M15.1  | Gold     | 523 | chr6:13799019709:138071429:u87;chr6:138027743:138039791: |
|         |        |    |           |         |         |            |          |          |     | 4597-CD4p CD225int CD127p                                |
|         |        |    |           |         |         |            |          |          |     | 137995691:Tmem;chr6:138027835:138039806:CD3;chr6:138027  |
|         |        |    |           |         |         |            |          |          |     | 981:138039926:CD4 Naive Primary 8pool                    |

|         |        |    |           |         |            |       |         |     |            |                                                 |
|---------|--------|----|-----------|---------|------------|-------|---------|-----|------------|-------------------------------------------------|
| ASHG19  |        |    |           |         |            |       |         |     |            |                                                 |
| SELNC2  |        |    | ENST00    |         |            |       |         |     | chr12:2636 |                                                 |
| A100006 |        |    | 0005403   | noncodi | ENSG000002 | RP11- |         |     | 4097-      | chr12:26423624:26453350:u87;chr12:26423782:2645 |
| 863     | 3.5105 | up | noncoding | 92      | ng         | 56234 | 283G6.4 | 699 | 26488789:- | 3012:HMEC                                       |

|         |        |    |           |         |            |       |          |     |            |                                                 |
|---------|--------|----|-----------|---------|------------|-------|----------|-----|------------|-------------------------------------------------|
| ASHG19  |        |    |           |         |            |       |          |     |            | chr1:218508854:218559528:HSMMtube;chr1:218509   |
| SELNC2  |        |    | ENST00    |         |            |       |          |     | chr1:21851 | 141:218577202:Fetal                             |
| A100012 |        |    | 0004144   | noncodi | ENSG000002 | RP11- |          |     | 7538-      | Muscle;chr1:218517509:218589915:Skeletal        |
| 058     | 5.5009 | up | noncoding | 52      | ng         | 32480 | 224O19.2 | 557 | 218519020: | Muscle;chr1:218517549:218576410:Panc1;chr1:2185 |
|         |        |    |           |         |            |       |          |     | -          | 17751:218613713:Osteoblasts                     |



|         |        |      |           |         |         |            |          |  |     |   |                                                            |
|---------|--------|------|-----------|---------|---------|------------|----------|--|-----|---|------------------------------------------------------------|
| ASHG19  |        |      |           |         |         |            |          |  |     |   | chr8:10679                                                 |
| SELNC2  |        |      |           | ENST00  |         |            |          |  |     |   | 7033-                                                      |
| A100564 |        |      |           | 0005240 | noncodi | ENSG000002 | RP11-    |  |     |   | 107072705: chr8:107056599:107074501:u87;chr8:107057040:107 |
| 182     | 3.4971 | down | noncoding | 45      | ng      | 51003      | 152P17.2 |  | 987 | - | 074578:Astrocytes                                          |

ASHG19  
 SELNC2  
 A100795  
 040 2.0923 down noncoding 68 ng 51562 MALAT1

ENST00  
 0005448 noncodi ENSG000002

4585

chr11:6526  
 6516-  
 65271100:+  
 Hippocampus Middle  
 150;chr11:65237892:65277160:Ovary;chr11:6523790  
 0:65276454:CD4 Memory Primary

chr11:05250002:05284089:Brain Anterior  
 Caudate;chr11:65236141:65278601:Sigmoid  
 Colon;chr11:65236162:65278849:HeLa;chr11:65236  
 264:65284293:Brain Angular  
 Gyrus;chr11:65236275:65278454:Psoas  
 Muscle;chr11:65236293:65278497:Esophagus;chr11:  
 65236328:65278486:Gastric;chr11:65236367:652764  
 89:Right Atrium;chr11:65236575:65276218:Brain  
 Mid Frontal  
 Lobe;chr11:65237462:65278685:Skeletal  
 Muscle;chr11:65237615:65278442:Lung;chr11:65237  
 705:65276621:Duodenum Smooth  
 Muscle;chr11:65237718:65284903:Brain Inferior  
 Temporal Lobe;chr11:65237743:65278340:Adrenal  
 Gland;chr11:65237750:65276614:Stomach Smooth  
 Muscle;chr11:65237768:65276595:Osteoblasts;chr11:  
 65237773:65276387:NHDF-  
 Ad;chr11:65237780:65272476:Ly4;chr11:65237780:  
 65284684:Brain Cingulate  
 Gyrus;chr11:65237782:65278645:HCT-  
 116;chr11:65237792:65276547:K562;chr11:6523779  
 5:65276373:Aorta;chr11:65237797:65278629:Left  
 Ventricle;chr11:65237834:65274588:Right  
 Ventricle;chr11:65237836:65278618:HBL1;chr11:65  
 237837:65278347:VACO  
 503;chr11:65237837:65278583:Small  
 Intestine;chr11:65237876:65276599:Brain







ASHG19  
 SELNC2  
 A100004  
 005 3.8923 up noncoding 13 ng 72719 CTB-161C1.1 Reliable 515

chr7:5558981:5575005:Lung;chr7:55604070:5575954:  
 Sigmoid Colon;chr7:5564674:5572947:Left  
 Ventricle;chr7:5564679:5573567:Stomach Smooth  
 Muscle;chr7:5564693:5574167:Small  
 Intestine;chr7:5564772:5572640:Right  
 Atrium;chr7:5564850:5573400:Esophagus;chr7:5564  
 889:5573668:Spleen;chr7:5564905:5574008:Aorta;ch  
 r7:5565201:5598917:Psoas  
 Muscle;chr7:5565310:5573796:Gastric;chr7:5565322:  
 5573222:LNCaP;chr7:5565338:5599172:Skeletal  
 Muscle;chr7:5565359:5573202:Thymus;chr7:556545  
 7:5572489:Right  
 Ventricle;chr7:5565687:5744325:Fetal  
 Muscle;chr7:5565836:5573211:VACO  
 503;chr7:5566034:5610583:Tonsil;chr7:5566111:557  
 3678:Colon Crypt  
 2;chr7:5566754:5573047:Bladder;chr7:5567241:5610  
 587:Ly3;chr7:5567405:5573812:Colon Crypt  
 3;chr7:5567495:5573966:DHL6;chr7:5568218:55731  
 50:VACO  
 9m;chr7:5568917:5573171:H1;chr7:5586839:561519  
 4:HeLa;chr7:5587306:5610600:VACO  
 503;chr7:5588087:5598869:Small  
 Intestine;chr7:5588676:5639042:Lung;chr7:5588677:  
 5615316:K562;chr7:5588711:5615292:Spleen;chr7:5  
 588726:5603419:Sigmoid  
 Colon;chr7:5588801:5603517:Gastric;chr7:5592299:  
 chr7:55963 5610301:VACO  
 62- 400;chr7:5669472:5743117:Lung;chr7:5691544:5744  
 5596876:+ 744:Brain Hippocampus Middle

|         |        |      |           |         |         |            |             |     |  |            |                                      |
|---------|--------|------|-----------|---------|---------|------------|-------------|-----|--|------------|--------------------------------------|
| ASHG19  |        |      |           |         |         |            |             |     |  |            |                                      |
| SELNC2  |        |      |           | ENST00  |         |            |             |     |  | chr1:32671 |                                      |
| A100824 |        |      |           | 0004216 | noncodi | ENSG000002 |             |     |  | 099-       |                                      |
| 122     | 2.2998 | down | noncoding | 16      | ng      | 24066      | RP4-622L5.7 | 786 |  | 32672415:- | chr1:32670496:32683809:Colon Crypt 1 |

|         |        |      |           |         |         |            |            |      |  |            |                               |
|---------|--------|------|-----------|---------|---------|------------|------------|------|--|------------|-------------------------------|
| ASHG19  |        |      |           |         |         |            |            |      |  |            |                               |
| SELNC2  |        |      |           | ENCT00  |         |            |            |      |  | chr12:9796 |                               |
| A100013 |        |      |           | 0001058 | noncodi | CATG000000 | CATG000000 |      |  | 1003-      |                               |
| 162     | 4.1488 | down | noncoding | 29      | ng      | 12985      | 12985.1    | 1505 |  | 97962507:- | chr12:97928133:97969609:MCF-7 |

|         |        |    |         |         |            |          |      |  |  |                                                                                                                                                                                                                                                                                                                                                                                                                                                                                                                                                                                                                                       |
|---------|--------|----|---------|---------|------------|----------|------|--|--|---------------------------------------------------------------------------------------------------------------------------------------------------------------------------------------------------------------------------------------------------------------------------------------------------------------------------------------------------------------------------------------------------------------------------------------------------------------------------------------------------------------------------------------------------------------------------------------------------------------------------------------|
| ASHG19  |        |    |         |         |            |          |      |  |  | chr17:48911501:48946120:Brain Hippocampus Middle;chr17:48911900:48946435:Brain Cingulate Gyrus;chr17:48913503:48946005:Brain Anterior Caudate;chr17:48914089:48946508:Brain Hippocampus Middle                                                                                                                                                                                                                                                                                                                                                                                                                                        |
| SELNC2  |        |    | ENST00  |         |            |          |      |  |  | 150;chr17:48914258:48946511:Brain Inferior Temporal Lobe;chr17:48914584:48945718:Brain Angular Gyrus;chr17:48921127:48947082:Skeletal Muscle;chr17:48921569:48946679:Fetal Muscle;chr17:48922220:48950371:Psoas Muscle;chr17:48922255:48945757:Lung;chr17:4892255:48946779:HeLa;chr17:48922302:48945677:Left Ventricle;chr17:48922332:48945577:Right Atrium;chr17:48922434:49028461:Fetal Intestine Large;chr17:48928158:48946406:Colon Crypt 1;chr17:48928263:48945553:Colon Crypt 2;chr17:48928752:48946765:Duodenum Smooth Muscle;chr17:48928781:48945692:Esophagus;chr17:48928840:48949433:Tonsil;chr17:48928846:48945623:Sigmoid |
| A100004 |        |    | 0004162 | noncodi | ENSG000002 |          |      |  |  | Colon;chr17:48928866:48945814:Spleen;chr17:48928884:48962640:CD4 Memory Primary 7pool;chr17:48928908:48946693:HMEC;chr17:48928914:48946487:Colon Crypt 3;chr17:48928927:48946491:VACO                                                                                                                                                                                                                                                                                                                                                                                                                                                 |
| 335     | 2.0211 | up | 63      | ng      | 29980      | TOB1-AS1 | 1351 |  |  | 503;chr17:48928933:48945685:Gastric;chr17:48928936:48945737:Small Intestine;chr17:48929029:48946261:CD56;chr17:4894040-29048:48946519:CD8 Memory 7pool;chr17:48929248:48946061:CD4 Naive Primary                                                                                                                                                                                                                                                                                                                                                                                                                                      |



|         |        |    |           |         |         |            |             |          |     |                                                                                                                                                                                                                                                                                                                                                                                                                                                                                                                                                                                                                                                                                                                                                                                                                                                                                                                                                                                                                                               |
|---------|--------|----|-----------|---------|---------|------------|-------------|----------|-----|-----------------------------------------------------------------------------------------------------------------------------------------------------------------------------------------------------------------------------------------------------------------------------------------------------------------------------------------------------------------------------------------------------------------------------------------------------------------------------------------------------------------------------------------------------------------------------------------------------------------------------------------------------------------------------------------------------------------------------------------------------------------------------------------------------------------------------------------------------------------------------------------------------------------------------------------------------------------------------------------------------------------------------------------------|
| ASHG19  |        |    |           |         |         |            |             |          |     | chr22:47111108:47115881:Pancreatic                                                                                                                                                                                                                                                                                                                                                                                                                                                                                                                                                                                                                                                                                                                                                                                                                                                                                                                                                                                                            |
| SELNC2  |        |    |           | ENST00  |         |            |             |          |     | islets;chr22:47120891:47171009:Left                                                                                                                                                                                                                                                                                                                                                                                                                                                                                                                                                                                                                                                                                                                                                                                                                                                                                                                                                                                                           |
| A100001 |        |    |           | 0005641 | noncodi | ENSG000002 |             |          |     | Ventricle;chr22:47120937:47151339:Right                                                                                                                                                                                                                                                                                                                                                                                                                                                                                                                                                                                                                                                                                                                                                                                                                                                                                                                                                                                                       |
| 518     | 3.1591 | up | noncoding | 52      | ng      | 60708      | CTA-29F11.1 | Reliable | 670 | Atrium;chr22:47121652:47212523:Lung;chr22:47121797:47171731:Gastric;chr22:47122081:47199614:Ly1;chr22:47122150:47151099:Colon Crypt2;chr22:47123289:47173139:Small Intestine;chr22:47123707:47150600:CD4p CD25-II17p PMAstim Th17;chr22:47124404:47151119:Right Ventricle;chr22:47126133:47189776:CD4p CD25-CD45ROp Memory;chr22:47126143:47189151:CD4p CD25-II17- PMAstim Th;chr22:47126225:47156135:Fetal Intestine Large;chr22:47126257:47171810:Skeletal Muscle;chr22:47126276:47156003:Fetal Intestine;chr22:47126309:47189121:CD4 Memory Primary 7pool;chr22:47126406:47151212:Esophagus;chr22:47126491:47187734:Sigmoid Colon;chr22:47126710:47189645:CD56;chr22:47126759:47194919:CD14;chr22:47126769:47177146:Colon Crypt1;chr22:47129710:47188820:Tonsil;chr22:47129860:47155690:HUVEC;chr22:47129977:47189264:CD4p CD25- CD45RAp Naive;chr22:47130708:47189319:Spleen;chr22:4715439:47199722:HBL1;chr22:47154582:47174370:DH7791-L6;chr22:47156346:47184970:Ly3;chr22:47157222:47158460:-7203732:CD20;chr22:47159882:47174367:CD19 |

|         |        |    |           |         |         |            |           |     |                                                         |
|---------|--------|----|-----------|---------|---------|------------|-----------|-----|---------------------------------------------------------|
| ASHG19  |        |    |           |         |         |            |           |     | chr1:167034150:167060489:Small                          |
| SELNC2  |        |    |           | ENST00  |         |            |           |     | Intestine;chr1:167034909:167060442:VACO                 |
| A100276 |        |    |           | 0004267 | noncodi | ENSG000002 | RP11-     |     | 503;chr1:167049094:167060421:Sigmoid                    |
| 093     | 2.2422 | up | noncoding | 09      | ng      | 31605      | 277B15.2  | 971 | Colon;chr1:167050266:167091822:Colon Crypt              |
|         |        |    |           |         |         |            |           |     | 1;chr1:167050811:167106924:RPMI-                        |
|         |        |    |           |         |         |            |           |     | 8402;chr1:167055109:167088187:Skeletal                  |
|         |        |    |           |         |         |            |           |     | chr1:16714 Muscle;chr1:167061598:167107859:Psoas        |
|         |        |    |           |         |         |            |           |     | 5154- Muscle;chr1:167073414:167102219:Jurkat;chr1:1670  |
|         |        |    |           |         |         |            |           |     | 167165026: 99223:167128757:HSMMtube;chr1:167125796:1671 |
|         |        |    |           |         |         |            |           |     | - 46570:VACO 503                                        |
|         |        |    |           |         |         |            |           |     | chr13:113528283:113706264:Pancreatic                    |
|         |        |    |           |         |         |            |           |     | islets;chr13:113612236:113642719:Lung;chr13:1136        |
|         |        |    |           |         |         |            |           |     | 12250:113641315:Left                                    |
|         |        |    |           |         |         |            |           |     | Ventricle;chr13:113612285:113757507:Brain               |
|         |        |    |           |         |         |            |           |     | Hippocampus                                             |
|         |        |    |           |         |         |            |           |     | Middle;chr13:113633553:113668596:Gastric;chr13:1        |
|         |        |    |           |         |         |            |           |     | 13635638:113668660:Colon Crypt                          |
|         |        |    |           |         |         |            |           |     | 3;chr13:113636776:113657006:Colon Crypt                 |
|         |        |    |           |         |         |            |           |     | 1;chr13:113636800:113656732:Colon Crypt                 |
|         |        |    |           |         |         |            |           |     | 2;chr13:113637770:113669757:LNCaP;chr13:113637          |
|         |        |    |           |         |         |            |           |     | 848:113668615:VACO                                      |
|         |        |    |           |         |         |            |           |     | 400;chr13:113650879:113757822:Brain Inferior            |
|         |        |    |           |         |         |            |           |     | Temporal Lobe;chr13:113688788:113757608:Brain           |
|         |        |    |           |         |         |            |           |     | Cingulate Gyrus;chr13:113689195:113739320:Brain         |
|         |        |    |           |         |         |            |           |     | Anterior Caudate;chr13:113694428:113748561:Brain        |
| ASHG19  |        |    |           |         |         |            |           |     | chr13:1136 Hippocampus Middle                           |
| SELNC2  |        |    |           | ENST00  |         |            |           |     | 21798- 150;chr13:113695156:113757432:Brain Angular      |
| A100015 |        |    |           | 0004467 | noncodi | ENSG000002 | MCF2L-AS1 |     | 113623138: Gyrus;chr13:113698306:113718391:Brain Mid    |
| 886     | 3.5426 | up | noncoding | 89      | ng      | 35280      |           | 712 | - Frontal Lobe                                          |

|         |        |    |           |         |            |       |           |          |     |                                        |
|---------|--------|----|-----------|---------|------------|-------|-----------|----------|-----|----------------------------------------|
| ASHG19  |        |    |           |         |            |       |           |          |     |                                        |
| SELNC2  |        |    | ENST00    |         |            |       |           |          |     | chr7:25988                             |
| A100003 |        |    | 0006029   | noncodi | ENSG000002 | CTD-  |           |          |     | 277-                                   |
| 990     | 8.5713 | up | noncoding | 92      | ng         | 70933 | 2227E11.1 | Reliable | 747 | 25989023:- chr7:25979571:26012296:MM1S |

|         |        |    |           |         |            |          |     |  |      |                                                         |
|---------|--------|----|-----------|---------|------------|----------|-----|--|------|---------------------------------------------------------|
| ASHG19  |        |    |           |         |            |          |     |  |      | chr14:32543177:32560581:HMEC;chr14:32543582:3           |
| SELNC2  |        |    | ENST00    |         |            |          |     |  |      | 2560333:NHEK;chr14:32543731:32554126:Fetal              |
| A100006 |        |    | 0005535   | noncodi | ENSG000002 | ARHGAP5- |     |  |      | chr14:3254                                              |
| 881     | 2.0658 | up | noncoding | 96      | ng         | 58655    | AS1 |  | 1375 | 4625- Intestine;chr14:32544066:32547960:Spleen;chr14:32 |
|         |        |    |           |         |            |          |     |  |      | 32545999:- 544117:32548103:Esophagus                    |

|         |        |      |           |    |    |       |             |              |            |                                                                                                                                                                                                                                                                                                                                                    |
|---------|--------|------|-----------|----|----|-------|-------------|--------------|------------|----------------------------------------------------------------------------------------------------------------------------------------------------------------------------------------------------------------------------------------------------------------------------------------------------------------------------------------------------|
| ASHG19  |        |      |           |    |    |       |             |              |            | chr20:48358527:48449414:Esophagus;chr20:48363884:48468134:Spleen;chr20:48380887:48462335:CD14;chr20:48383102:48412240:HeLa;chr20:48384482:48449420:Sigmoid                                                                                                                                                                                         |
| SELNC2  |        |      |           |    |    |       |             |              |            | Colon;chr20:48384597:48423399:Adrenal Gland;chr20:48388660:48440895:Colon Crypt 1;chr20:48392206:48441118:Ly3;chr20:48401596:48463292:DHL6;chr20:48441986:48506238:Aorta;chr20:48490820:48534315:Pancreatic islets;chr20:48502151:48533649:Spleen;chr20:48502312:48555717:Brain Anterior                                                           |
| A100013 |        |      |           |    |    |       |             |              |            | Caudate;chr20:48502318:48555951:Brain Inferior Temporal Lobe;chr20:48524524:48534532:Colon Crypt 3;chr20:48525080:48555317:Fetal Intestine;chr20:48525121:48563588:Fetal Intestine Large;chr20:48525266:48541269:Colon Crypt 2;chr20:48525668:48555827:Colon Crypt 1;chr20:48525728:48555911:Small Intestine;chr20:48525739:48555882:Sigmoid Colon |
| 976     | 2.0657 | up   | noncoding | 36 | ng | 53508 | 53508.1     | 3942         | 48378366:+ | chr5:146767343:146846803:Stomach Smooth Muscle;chr5:146775535:146870873:Ovary;chr5:146779092:146807795:Osteoblasts;chr5:146779966:146836223:Aorta;chr5:146810115:146868285:Fetal Muscle;chr5:146829832:146848915:H1;chr5:146845556:146867847:HUVEC;chr5:146858606:146866294:Osteoblasts;chr5:146861072:146865567:CD34                              |
| ASHG19  |        |      |           |    |    |       |             |              |            | Primary RO01536;chr5:146861643:146865306:CD34                                                                                                                                                                                                                                                                                                      |
| SELNC2  |        |      |           |    |    |       |             |              |            | Primary RO01480                                                                                                                                                                                                                                                                                                                                    |
| A100017 |        |      |           |    |    |       |             |              |            |                                                                                                                                                                                                                                                                                                                                                    |
| 023     | 2.2087 | down | noncoding | 70 | ng | 72239 | CTB-108O6.2 | Reliable 237 | +          |                                                                                                                                                                                                                                                                                                                                                    |
| ASHG19  |        |      |           |    |    |       |             |              |            |                                                                                                                                                                                                                                                                                                                                                    |
| SELNC2  |        |      |           |    |    |       |             |              |            |                                                                                                                                                                                                                                                                                                                                                    |
| A100017 |        |      |           |    |    |       |             |              |            |                                                                                                                                                                                                                                                                                                                                                    |
| 065     | 3.56   | up   | noncoding | 37 | ng | 31817 | 31817.1     | 2596         | 53525248:+ | chr17:5352 chr17:53467780:53534629:Adipose Nuclei;chr17:53493092:53532366:Duodenum Smooth Muscle                                                                                                                                                                                                                                                   |

|         |        |      |           |         |         |            |        |     |                                     |
|---------|--------|------|-----------|---------|---------|------------|--------|-----|-------------------------------------|
| ASHG19  |        |      |           |         |         |            |        |     | chr10:1192                          |
| SELNC2  |        |      |           | ENST00  |         |            |        |     | 49996-                              |
| A100781 |        |      |           | 0004400 | noncodi | ENSG000002 |        |     | 119301845:                          |
| 733     | 2.3616 | down | noncoding | 07      | ng      | 29847      | EMX2OS | 754 | - chr10:119291814:119313346:NHDF-Ad |

|         |        |    |           |         |         |            |             |          |     |                                                                                                                                                                                                                                                                                                                                                      |
|---------|--------|----|-----------|---------|---------|------------|-------------|----------|-----|------------------------------------------------------------------------------------------------------------------------------------------------------------------------------------------------------------------------------------------------------------------------------------------------------------------------------------------------------|
| ASHG19  |        |    |           | ENST00  |         |            |             |          |     | chr14:5310                                                                                                                                                                                                                                                                                                                                           |
| SUPERL  |        |    |           | 0005540 | noncodi | ENSG000002 | RP11-       |          |     | 7557-                                                                                                                                                                                                                                                                                                                                                |
| NC2A10  |        |    |           | 55      | ng      | 58757      | 841O20.2    | Reliable | 581 | 53108284:+                                                                                                                                                                                                                                                                                                                                           |
| 0001252 | 2.2981 | up | noncoding |         |         |            |             |          |     | chr6:30456364:30512797:Tonsil;chr6:30456489:30511165:Spleen;chr6:30456531:30496380:Sigmoid Colon;chr6:30459866:30525894:Small Intestine;chr6:30483089:30526577:CD8 Memory 7pool;chr6:30483105:30525972:Pancreatic islets;chr6:30522089:30526621:CD4 Memory Primary 7pool;chr6:30522426:30525860:Fetal Muscle;chr6:30522440:30525857:NHLF;chr6:305224 |
| ASHG19  |        |    |           | ENST00  |         |            |             |          |     | chr6:30484                                                                                                                                                                                                                                                                                                                                           |
| SELNC2  |        |    |           | 0004151 | noncodi | ENSG000002 | XXbac-      |          |     | 61:30526297:CD8                                                                                                                                                                                                                                                                                                                                      |
| A100015 |        |    |           | 95      | ng      | 35781      | BPG249D20.9 | Gold     | 851 | 043-primiary;chr6:30522483:30526459:CD4p CD25-                                                                                                                                                                                                                                                                                                       |
| 910     | 3.1591 | up | noncoding |         |         |            |             |          |     | 30486994:+ II17p PMAstim Th17                                                                                                                                                                                                                                                                                                                        |
| ASHG19  |        |    |           | ENST00  |         |            |             |          |     | chr3:193963033:194033612:RPMI-                                                                                                                                                                                                                                                                                                                       |
| SELNC2  |        |    |           | 0004141 | noncodi | ENSG000002 | LINC00887   |          |     | 8402;chr3:193966874:194004090:Fetal                                                                                                                                                                                                                                                                                                                  |
| A100043 |        |    |           | 20      | ng      | 14145      |             |          |     | Muscle;chr3:193971946:193990154:HUVVEC;chr3:193982988:193997694:Adrenal                                                                                                                                                                                                                                                                              |
| 741     | 2.0072 | up | noncoding |         |         |            |             |          |     | chr3:19401 Gland;chr3:193983051:193997202:Ovary;chr3:193988988-8211:194015486:Pancreas;chr3:194004041:19401555194030589:2:H1;chr3:194022156:194028209:MM1S;chr3:194032286:194055090:HeLa                                                                                                                                                             |

ASHG19  
 SELNC2  
 A100011  
 218 2.0876 up noncoding 42 ng 30709 AC104024.1 Reliable 2201

ENST00  
 0004281 noncodi ENSG000002

chr17:1687  
 9313-  
 16884667:-

chr17:16841711:16905045:101ed0;chr17:16840505:1  
 6895884:CD20;chr17:16848995:16895735:HBL1;chr  
 17:16849963:16895450:GM12878;chr17:16857543:1  
 6895465:CD19  
 Primary;chr17:16867134:16895512:Ly3;chr17:16868  
 372:16895656:Tonsil;chr17:16868489:16895794:M  
 M1S;chr17:16871372:16895547:DND41;chr17:1690  
 4912:16994597:VACO  
 503;chr17:16904926:17032793:Pancreatic  
 islets;chr17:16904952:16957284:Fetal Intestine  
 Large;chr17:16905178:17024731:Fetal  
 Intestine;chr17:16910885:17057075:Brain  
 Hippocampus  
 Middle;chr17:16910923:16948823:HCT-  
 116;chr17:16911039:17056941:Lung;chr17:1691105  
 3:16951863:HeLa;chr17:16911068:16932103:HCC19  
 54;chr17:16911294:17030580:Gastric;chr17:1691211  
 2:16955078:u87;chr17:16912295:17008666:Pancreas;  
 chr17:16912540:16979530:HSMMtube;chr17:169129  
 29:16985611:Osteoblasts;chr17:16912952:16978959:  
 HMEC;chr17:16912965:17059812:Brain Cingulate  
 Gyrus;chr17:16913012:17063100:Brain Anterior  
 Caudate;chr17:16913151:16961046:Left  
 Ventricle;chr17:16913179:16932552:VACO  
 9m;chr17:16913199:16979561:HSMM;chr17:169132  
 31:16978948:Skeletal Muscle  
 Myoblast;chr17:16913232:16967371:Esophagus;chr1  
 7:16913280:16957311:Colon Crypt  
 1;chr17:16913349:16936008:Colon Crypt  
 2;chr17:16921052:16995066:LNCaP;chr17:16930832

|         |        |    |           |         |            |            |         |      |                                                     |
|---------|--------|----|-----------|---------|------------|------------|---------|------|-----------------------------------------------------|
| ASHG19  |        |    |           |         |            |            |         |      | chr6:15818                                          |
| SELNC2  |        |    | FTMT2     |         |            |            |         |      | 7915- chr6:158168374:158196042:CD4p CD25- Il17-     |
| A100005 |        |    | 2200011   | noncodi | CATG000000 | CATG000000 |         |      | 158189539: PMAstim Th;chr6:158174308:158195733:CD4p |
| 541     | 2.2482 | up | noncoding | 278     | ng         | 90647      | 90647.1 | 1625 | - CD25- Il17p PMAstim Th17                          |



|         |        |      |           |         |         |            |           |      |            |                                                                                                   |
|---------|--------|------|-----------|---------|---------|------------|-----------|------|------------|---------------------------------------------------------------------------------------------------|
| ASHG19  |        |      |           |         |         |            |           |      |            | chr15:63125186:63201059:Stomach Smooth<br>Muscle;chr15:63165410:63194089:Duodenum<br>Smooth       |
| SELNC2  |        |      |           | ENST00  |         |            |           |      |            | chr15:6312                                                                                        |
| A100614 |        |      |           | 0005588 | noncodi | ENSG000002 | RP11-     |      |            | Muscle;chr15:63171167:63190796:HUVEC;chr15:63                                                     |
| 107     | 10.351 | down | noncoding | 88      | ng      | 59370      | 1069G10.1 | 2978 | 63127596:- | 178350:63198071:u87;chr15:63178431:63190422:As<br>trocytes;chr15:63187301:63234200:Left Ventricle |

|         |       |      |           |         |         |            |           |      |
|---------|-------|------|-----------|---------|---------|------------|-----------|------|
| ASHG19  |       |      |           |         |         |            |           |      |
| SELNC2  |       |      |           | ENST00  |         |            |           |      |
| A101129 |       |      |           | 0005652 | noncodi | ENSG000002 |           |      |
| 761     | 2.222 | down | noncoding | 56      | ng      | 34912      | LINC00338 | 1234 |

chr17:75078960:75107007:MM1S;chr17:75089372:75177504:Gastric;chr17:75089434:75179269:Lung;chr17:75090732:75185340:Brain Inferior Temporal Lobe;chr17:75090920:75183340:Brain Cingulate Gyrus;chr17:75091070:75162154:Brain Angular Gyrus;chr17:75091936:75244237:Brain Hippocampus Middle;chr17:75092038:75162995:Skeletal Muscle;chr17:75092246:75210377:Brain Anterior Caudate;chr17:75092282:75162618:Adipose Nuclei;chr17:75092469:75179721:Brain Hippocampus Middle 150;chr17:75092478:75157123:Osteoblasts;chr17:75092668:75179784:Fetal Muscle;chr17:75092686:75161313:Left Ventricle;chr17:75092688:75178581:Psoas Muscle;chr17:75092740:75185725:Spleen;chr17:75092774:75145755:Small Intestine;chr17:75092796:75125744:Brain Mid Frontal Lobe;chr17:75092800:75205783:Adrenal Gland;chr17:75092825:75161754:Right Atrium;chr17:75094383:75128210:HSMMtube;chr17:75110737:75126418:HUVEC;chr17:75111947:75130104:Panc1;chr17:75117759:75142519:HMEC;chr17:75130900:75161298:MM1S;chr17:75134520:7514575091065:+850:HUVEC;chr17:75134802:75185828:Ly4

|         |        |    |           |         |            |       |           |      |   |                                                          |
|---------|--------|----|-----------|---------|------------|-------|-----------|------|---|----------------------------------------------------------|
| ASHG19  |        |    |           |         |            |       |           |      |   | chr3:195834121:195887811:CD4 Memory Primary              |
| SELNC2  |        |    | ENST00    |         |            |       |           |      |   | 7pool;chr3:195834564:195873620:K562;chr3:195853          |
| A100011 |        |    | 0004570   | noncodi | ENSG000002 |       |           |      |   | 704:195896426:HCC1954;chr3:195886180:1959309             |
| 950     | 6.6766 | up | noncoding | 79      | ng         | 24652 | LINC00885 | 1828 | + | 91:CD14;chr3:195886382:195921896:Small                   |
|         |        |    |           |         |            |       |           |      |   | Intestine;chr3:195886668:195921587:Colon Crypt           |
|         |        |    |           |         |            |       |           |      |   | 2;chr3:195905320:195923896:Ly3;chr3:195905452:1          |
|         |        |    |           |         |            |       |           |      |   | 95920877:Fetal                                           |
|         |        |    |           |         |            |       |           |      |   | chr3:19586 Thymus;chr3:195905480:195930175:HBL1;chr3:195 |
|         |        |    |           |         |            |       |           |      |   | 9507- 906708:195922858:CD34                              |
|         |        |    |           |         |            |       |           |      |   | 195887761: adult;chr3:195908864:195922707:CD34           |
|         |        |    |           |         |            |       |           |      |   | fetal;chr3:195913496:195955891:Ovary                     |

|         |        |      |           |         |         |            |           |     |            |                               |
|---------|--------|------|-----------|---------|---------|------------|-----------|-----|------------|-------------------------------|
| ASHG19  |        |      |           |         |         |            |           |     |            |                               |
| SELNC2  |        |      |           | ENST00  |         |            |           |     | chr21:1756 |                               |
| A100088 |        |      |           | 0004454 | noncodi | ENSG000002 |           |     | 6715-      |                               |
| 326     | 2.8138 | down | noncoding | 61      | ng      | 15386      | LINC00478 | 710 | 17979542:+ | chr21:17675058:17727232:LNCaP |

|         |        |      |           |         |         |            |           |  |     |            |                                      |  |
|---------|--------|------|-----------|---------|---------|------------|-----------|--|-----|------------|--------------------------------------|--|
| ASHG19  |        |      |           |         |         |            |           |  |     |            |                                      |  |
| SELNC2  |        |      |           | ENST00  |         |            |           |  |     | chr21:1756 |                                      |  |
| A100088 |        |      |           | 0004454 | noncodi | ENSG000002 |           |  |     | 6715-      | chr21:17776670:17798151:Fetal        |  |
| 326     | 2.8138 | down | noncoding | 61      | ng      | 15386      | LINC00478 |  | 710 | 17979542:+ | Muscle;chr21:17790506:17800624:HUVEC |  |

|         |        |      |           |         |         |            |           |     |  |  |            |                                      |
|---------|--------|------|-----------|---------|---------|------------|-----------|-----|--|--|------------|--------------------------------------|
| ASHG19  |        |      |           |         |         |            |           |     |  |  |            |                                      |
| SELNC2  |        |      |           | ENST00  |         |            |           |     |  |  | chr21:1756 |                                      |
| A100088 |        |      |           | 0004454 | noncodi | ENSG000002 |           |     |  |  | 6715-      |                                      |
| 326     | 2.8138 | down | noncoding | 61      | ng      | 15386      | LINC00478 | 710 |  |  | 17979542:+ | chr21:17904299:17910609:Fetal Muscle |

|         |        |      |           |    |                 |            |           |     |  |  |  |                                        |
|---------|--------|------|-----------|----|-----------------|------------|-----------|-----|--|--|--|----------------------------------------|
| ASHG19  |        |      |           |    |                 |            |           |     |  |  |  |                                        |
| SELNC2  |        |      |           |    | ENST00          |            |           |     |  |  |  | chr21:1756                             |
| A100088 |        |      |           |    | 0004454 noncodi | ENSG000002 |           |     |  |  |  | 6715-                                  |
| 326     | 2.8138 | down | noncoding | 61 | ng              | 15386      | LINC00478 | 710 |  |  |  | 17979542:+ chr21:17941411:17967670:u87 |

|         |        |      |           |         |         |             |              |          |     |                                                            |
|---------|--------|------|-----------|---------|---------|-------------|--------------|----------|-----|------------------------------------------------------------|
| ASHG19  |        |      |           |         |         |             |              |          |     | chr6:149319908:149356643:u87;chr6:149349238:149            |
| SELNC2  |        |      |           | ENST00  |         |             |              |          |     | chr6:14934 419120:DND41;chr6:149349433:149410166:HBL1;c    |
| A100009 |        |      |           | 0004334 | noncodi | ENSG0000002 |              |          |     | 8836- hr6:149349666:149401648:Toledo;chr6:149349702:1      |
| 738     | 5.5753 | down | noncoding | 42      | ng      | 36591       | RP11-162J8.3 | Reliable | 130 | 149353709: 49401761:Ly4;chr6:149349844:149403817:Ly3;chr6: |
|         |        |      |           |         |         |             |              |          |     | - 149352296:149386196:HSMMtube                             |

|         |        |    |           |         |         |            |            |  |      |                                                           |
|---------|--------|----|-----------|---------|---------|------------|------------|--|------|-----------------------------------------------------------|
| ASHG19  |        |    |           |         |         |            |            |  |      | chr20:326788:366598:K562;chr20:327187:354654:V            |
| SELNC2  |        |    |           | ENCT00  |         |            |            |  |      | ACO 400;chr20:327465:364442:CD8 Memory                    |
| A100016 |        |    |           | 0002639 | noncodi | CATG000000 | CATG000000 |  |      | 7pool;chr20:328015:364988:VACO                            |
| 268     | 4.2494 | up | noncoding | 09      | ng      | 54027      | 54027.1    |  | 1226 | 503;chr20:340590:365017:NHEK;chr20:342413:3642            |
|         |        |    |           |         |         |            |            |  |      | chr20:3449 65:HeLa;chr20:342738:359360:HCC1954;chr20:3436 |
|         |        |    |           |         |         |            |            |  |      | 34-351058:- 43:365042:CD4 Memory Primary 7pool            |



|         |        |    |           |         |         |            |            |     |                                                  |
|---------|--------|----|-----------|---------|---------|------------|------------|-----|--------------------------------------------------|
| ASHG19  |        |    |           |         |         |            |            |     | chr21:39589919:39725911:u87;chr21:39590687:3968  |
| SELNC2  |        |    |           | ENST00  |         |            |            |     | 4328:CD14;chr21:39610820:39701924:HSMM;chr21     |
| A100001 |        |    |           | 0004449 | noncodi | ENSG000002 |            |     | :39611470:39699447:Skeletal Muscle               |
| 934     | 3.0292 | up | noncoding | 77      | ng      | 26012      | AP001434.2 | 287 | Myoblast;chr21:39611805:39725186:Osteoblasts;chr |
|         |        |    |           |         |         |            |            |     | 21:39634533:39700615:HSMMtube;chr21:39634821     |
|         |        |    |           |         |         |            |            |     | :39699618:NHDF-                                  |
|         |        |    |           |         |         |            |            |     | 39610123:- Ad;chr21:39638616:39664746:NHEK       |

|         |        |    |           |         |         |            |             |          |                                                    |
|---------|--------|----|-----------|---------|---------|------------|-------------|----------|----------------------------------------------------|
| ASHG19  |        |    |           |         |         |            |             |          |                                                    |
| SELNC2  |        |    |           | ENST00  |         |            |             |          | chrX:99928                                         |
| A100006 |        |    |           | 0005688 | noncodi | ENSG000002 | RP11-       |          | 327- chrX:99897948:99941436:Adipose                |
| 908     | 2.3455 | up | noncoding | 09      | ng      | 61295      | 524D16__A.3 | Reliable | 652 99928978:+ Nuclei;chrX:99897993:99941188:HUVEC |

|         |        |    |           |         |            |       |         |      |                                                                  |
|---------|--------|----|-----------|---------|------------|-------|---------|------|------------------------------------------------------------------|
| ASHG19  |        |    |           |         |            |       |         |      | chr8:95625168:95655730:Gastric;chr8:95625246:9566334:Colon Crypt |
| SELNC2  |        |    | ENST00    |         |            |       |         |      | 1;chr8:95645639:95655599:Colon Crypt                             |
| A100000 |        |    | 0005627   | noncodi | ENSG000002 | RP11- |         |      | 2;chr8:95649813:95665769:Colon Crypt                             |
| 712     | 29.651 | up | noncoding | 60      | ng         | 61437 | 22C11.2 | 2183 | chr8:95649                                                       |
|         |        |    |           |         |            |       |         |      | 3;chr8:95650653:95671119:HCC1954;chr8:9565080                    |
|         |        |    |           |         |            |       |         |      | 513-7:95671072:NHEK;chr8:95651039:95655110:VACO                  |
|         |        |    |           |         |            |       |         |      | 95651695:-9m                                                     |

|         |        |    |           |         |            |       |           |      |                                                 |
|---------|--------|----|-----------|---------|------------|-------|-----------|------|-------------------------------------------------|
| ASHG19  |        |    |           |         |            |       |           |      | chr4:2925304:2963931:LNCaP;chr4:2925418:296389  |
| SELNC2  |        |    | ENST00    |         |            |       |           |      | 0:Gastric;chr4:2931220:2946939:Colon Crypt      |
| A100002 |        |    | 0005127   | noncodi | ENSG000002 |       |           |      | chr4:29372                                      |
| 183     | 2.2457 | up | noncoding | 12      | ng         | 49673 | NOP14-AS1 | Gold | 3188                                            |
|         |        |    |           |         |            |       |           |      | 73-3;chr4:2931273:2945707:Colon Crypt           |
|         |        |    |           |         |            |       |           |      | 2;chr4:2936426:2940017:CD4p CD25- II17p         |
|         |        |    |           |         |            |       |           |      | 2943778:+PMAstim Th17;chr4:2936474:2940031:NHEK |

ASHG19  
SELNC2  
A100981  
099 2.3468 down noncoding

ENST00  
0005580 noncodi ENSG000002 RP11-  
71 ng 59347 798K3.2

Reliable 741

chr15:6727 8699- 67351591:-  
Th17;chr15:67355996:67443611:CD4p CD25-  
CD45ROp  
Memory;chr15:67356047:67391700:K562;chr15:673

chr15:67273000:67444892:HSMMITUBE;chr15:6730555  
51:67494412:Osteoblasts;chr15:67313358:67492820:  
Panc1;chr15:67315459:67370465:HeLa;chr15:673157  
76:67489681:Esophagus;chr15:67315940:67343228:  
HMEC;chr15:67315957:67490205:Small  
Intestine;chr15:67316001:67381111:Fetal  
Intestine;chr15:67316023:67455233:Fetal Intestine  
Large;chr15:67317794:67468217:Colon Crypt  
1;chr15:67331697:67482584:Gastric;chr15:67333711  
:67343350:Skeletal Muscle  
Myoblast;chr15:67333711:67343392:HSMM;chr15:6  
7335503:67451448:Adipose  
Nuclei;chr15:67336274:67492619:Lung;chr15:67336  
292:67374242:Aorta;chr15:67336346:67360297:Panc  
reas;chr15:67336445:67451264:Right  
Atrium;chr15:67339819:67443576:Duodenum  
Smooth Muscle;chr15:67340158:67490067:Sigmoid  
Colon;chr15:67340644:67441951:Colon Crypt  
2;chr15:67342858:67447290:Ly1;chr15:67347840:67  
491869:CD20;chr15:67348117:67430609:CD8  
primiary;chr15:67354926:67408793:Ly4;chr15:67355  
589:67420519:HCT-  
116;chr15:67355772:67469893:CD4p CD25- Il17-  
PMAstim Th;chr15:67355940:67496057:Psoas  
Muscle;chr15:67355971:67443321:CD4 Memory  
Primary 7pool;chr15:67355995:67443338:CD4p  
CD25- Il17p PMAstim



ASHG19  
SELNC2  
A100010  
082 3.1499 up

noncoding 39

ENST00  
0006065 noncodi  
ENSG000002  
ng 71969

U47924.29 Reliable 434

chr12:7074  
112-  
7074545:+  
8pool;chr12:7045612:7071479:Toledo;chr12:704563  
6:7072391:Thymus;chr12:7045722:7069352:Ly4;chr  
12:7045931:7071909:GM12878;chr12:7050709:7057

chr12:7021510:7026081:H2171;chr12:7022000:7051  
380:Brain Cingulate  
Gyrus;chr12:7022685:7051255:Stomach Smooth  
Muscle;chr12:7022964:7047898:GLC16;chr12:70324  
34:7039694:H2171;chr12:7032586:7039696:Lung;ch  
r12:7033029:7039703:Esophagus;chr12:7033041:704  
8410:Right Atrium;chr12:7033067:7050686:Brain  
Angular  
Gyrus;chr12:7033253:7051404:LNCaP;chr12:703329  
1:7048082:Fetal  
Muscle;chr12:7033383:7048045:Ovary;chr12:703351  
4:7048028:H1;chr12:7033555:7047595:Bladder;chr1  
2:7033612:7047812:Pancreas;chr12:7033631:705566  
6:VACO 503;chr12:7033645:7047280:Right  
Ventricle;chr12:7044264:7072113:CD14;chr12:70444  
26:7072735:CD34 Primary  
RO01536;chr12:7044970:7072648:CD19  
Primary;chr12:7045010:7071657:CD4 Naive Primary  
7pool;chr12:7045041:7071857:CD4p CD225int  
CD127p  
Tmem;chr12:7045046:7072000:CD3;chr12:7045125:  
7071857:CD8 Naive  
7pool;chr12:7045276:7072350:CD56;chr12:7045399:  
7071773:Ly3;chr12:7045533:7071721:CD8 Naive  
8pool;chr12:7045550:7072074:CD4 Naive Primary  
8pool;chr12:7045555:7071876:CD4 Memory  
Primary

ASHG19  
 SELNC2  
 A100929  
 764 3.3227 up noncoding 68 ng 49859 PVT1

ENST00  
 0005138 noncodi ENSG000002

1699

chr8:12890 F-  
 2874- Ad;chr8:128901634:128963789:u87;chr8:128901635:  
 129113499: 128963280:HSMM;chr8:128901711:128963214:Astr  
 ocytes;chr8:128901721:128963158:Skeletal Muscle

chr8:128795812:128824254:HCC1954;chr8:1287954  
 47:128824370:MCF-  
 7;chr8:128800421:128841375:NCI-  
 H82;chr8:128800542:128824452:DHL6;chr8:128805  
 716:128945203:Pancl;chr8:128805831:128844962:N  
 HDF-  
 Ad;chr8:128805875:128965109:Osteoblasts;chr8:128  
 805887:128813518:GLC16;chr8:128805907:1288245  
 71:NHLF;chr8:128805989:128825280:HUVEC;chr8:  
 128810486:128990391:LNCaP;chr8:128810566:1289  
 07192:Ovary;chr8:128814718:128836148:H1;chr8:12  
 8843114:128888912:HUVEC;chr8:128843308:12888  
 3898:Astrocytes;chr8:128843389:128868801:HSMM  
 tube;chr8:128843496:128868262:HSMM;chr8:12884  
 3510:128868207:Skeletal Muscle  
 Myoblast;chr8:128857207:128868734:IMR90;chr8:1  
 28857956:128964803:Adrenal  
 Gland;chr8:128860824:128884150:MCF-  
 7;chr8:128860946:128903357:HCC1954;chr8:12886  
 1014:128868643:NHLF;chr8:128862297:128868773:  
 NHDF-  
 Ad;chr8:128862757:128888657:HMEC;chr8:128863  
 156:128888485:NHEK;chr8:128863390:128904642:  
 Esophagus;chr8:128882161:128964080:HSMMtube;c  
 hr8:128900610:128941873:NHLF;chr8:128901448:1  
 28947020:HUVEC;chr8:128901547:128941881:NHD

|         |        |    |           |         |            |       |      |  |      |            |                                                          |
|---------|--------|----|-----------|---------|------------|-------|------|--|------|------------|----------------------------------------------------------|
| ASHG19  |        |    |           |         |            |       |      |  |      |            | chr8:129045436:129065022:CD14;chr8:129046437:1           |
| SELNC2  |        |    | ENST00    |         |            |       |      |  |      | chr8:12890 | 29091141:K562;chr8:129057564:129063683:CD34              |
| A100929 |        |    | 0005138   | noncodi | ENSG000002 |       |      |  |      | 2874-      | adult;chr8:129058554:129143259:HBL1;chr8:129059          |
| 764     | 3.3227 | up | noncoding | 68      | ng         | 49859 | PVT1 |  | 1699 | +          | 129113499: 294:129143247:Ly3;chr8:129087461:129118095:CD |
|         |        |    |           |         |            |       |      |  |      |            | 4p CD25- Il17- PMAstim Th                                |

|         |        |      |           |         |         |            |     |  |  |  |                                                 |
|---------|--------|------|-----------|---------|---------|------------|-----|--|--|--|-------------------------------------------------|
| ASHG19  |        |      |           |         |         |            |     |  |  |  | chr11:1924529:1991431:Left                      |
| SELNC2  |        |      |           | ENST00  |         |            |     |  |  |  | Ventricle;chr11:1927730:1991499:Right           |
| A100668 |        |      |           | 0004127 | noncodi | ENSG000001 |     |  |  |  | Atrium;chr11:1937073:1954345:Skeletal           |
| 904     | 3.3284 | down | noncoding | 88      | ng      | 30600      | H19 |  |  |  | Muscle;chr11:1937589:1954304:Fetal              |
|         |        |      |           |         |         |            |     |  |  |  | Muscle;chr11:1967535:1971731:Colon Crypt        |
|         |        |      |           |         |         |            |     |  |  |  | 3;chr11:1967588:1971636:VACO                    |
|         |        |      |           |         |         |            |     |  |  |  | 400;chr11:1967605:1976290:Adrenal               |
|         |        |      |           |         |         |            |     |  |  |  | Gland;chr11:1968470:1971027:Colon Crypt         |
|         |        |      |           |         |         |            |     |  |  |  | 2;chr11:1968499:1981090:Fetal                   |
|         |        |      |           |         |         |            |     |  |  |  | Muscle;chr11:1968517:2015633:HSMM;chr11:19685   |
|         |        |      |           |         |         |            |     |  |  |  | 36:2009985:Skeletal Muscle                      |
|         |        |      |           |         |         |            |     |  |  |  | Myoblast;chr11:1970465:2015366:Ovary;chr11:1971 |
|         |        |      |           |         |         |            |     |  |  |  | 932:1976153:VACO                                |
|         |        |      |           |         |         |            |     |  |  |  | 400;chr11:1982329:1993706:Fetal                 |
|         |        |      |           |         |         |            |     |  |  |  | Muscle;chr11:1984055:1999144:Psoas              |
|         |        |      |           |         |         |            |     |  |  |  | Muscle;chr11:1986257:1993492:HSMMtube;chr11:1   |
|         |        |      |           |         |         |            |     |  |  |  | 987729:1994124:VACO                             |
|         |        |      |           |         |         |            |     |  |  |  | 400;chr11:1999934:2007267:VACO                  |
|         |        |      |           |         |         |            |     |  |  |  | 400;chr11:2007360:2011387:VACO                  |
|         |        |      |           |         |         |            |     |  |  |  | 400;chr11:2007505:2020554:Fetal Intestine       |
|         |        |      |           |         |         |            |     |  |  |  | chr11:2016 Large;chr11:2007634:2020503:Fetal    |
|         |        |      |           |         |         |            |     |  |  |  | 406- Intestine;chr11:2008546:2021217:Fetal      |
|         |        |      |           |         |         |            |     |  |  |  | 2019044:- Muscle;chr11:2011395:2019037:VACO 400 |



|         |        |      |           |         |         |            |           |     |            |                                               |
|---------|--------|------|-----------|---------|---------|------------|-----------|-----|------------|-----------------------------------------------|
| ASHG19  |        |      |           |         |         |            |           |     |            | chr2:45389724:45402031:Stomach Smooth         |
| SELNC2  |        |      |           | ENST00  |         |            |           |     |            | Muscle;chr2:45393131:45428128:HSMM;chr2:45394 |
| A100586 |        |      |           | 0004270 | noncodi | ENSG000002 |           |     | chr2:45392 | 542:45428363:HSMMtube;chr2:45394767:45427999  |
| 240     | 3.4078 | down | noncoding | 20      | ng      | 05054      | LINC01121 | 722 | 009-       | :Skeletal Muscle                              |
|         |        |      |           |         |         |            |           |     | 45419404:- | Myoblast;chr2:45395340:45412703:Osteoblasts   |

ASHG19

SELNC2

A100342

200

2.2239

down

noncoding

23

MICT00

0000626

noncodi

ng

CATG000000

06004

CATG000000

06004.1

1632

chr11:6904

0085-

69042067:-

chr11:69019019:69070837:HCC1954;chr11:69035833:69089097:Pancreatic islets;chr11:69040170:69070245:Esophagus;chr11:69040207:69079860:Gastric;chr11:69040227:69070579:Colon Crypt 1;chr11:69040530:69066696:Pancreas;chr11:69040623:69070143:Colon Crypt 2;chr11:69041149:69070238:VACO 400;chr11:69041330:69070368:Sigmoid Colon;chr11:69041617:69072027:VACO 503;chr11:69043247:69081064:Ly4;chr11:69048050:69089929:u87;chr11:69048698:69070633:VACO 9m;chr11:69059646:69088726:Panc1;chr11:69059793:69071009:HCT-116;chr11:69059907:69089985:HUVEC;chr11:69061501:69070316:K562;chr11:69063032:69089949:Osteoblasts;chr11:69063158:69072297:HeLa;chr11:69063267:69089937:NHLF;chr11:69063296:69089921:NHDF- Ad;chr11:69063593:69089932:HSMM;chr11:69063607:69089917:Skeletal Muscle Myoblast;chr11:69063939:69070881:Astrocytes

|         |        |    |           |         |            |       |            |          |      |            |                                                 |
|---------|--------|----|-----------|---------|------------|-------|------------|----------|------|------------|-------------------------------------------------|
| ASHG19  |        |    |           |         |            |       |            |          |      |            |                                                 |
| SELNC2  |        |    | ENST00    |         |            |       |            |          |      | chr11:6924 | chr11:69234493:69260008:VACO                    |
| A100006 |        |    | 0005452   | noncodi | ENSG000002 |       |            |          |      | 0458-      | 400;chr11:69256707:69279345:Fetal               |
| 093     | 2.6247 | up | noncoding | 02      | ng         | 55980 | AP000439.1 | Reliable | 2376 | 69244389:+ | Muscle;chr11:69276903:69296403:Colon Crypt 2    |
| ASHG19  |        |    |           |         |            |       |            |          |      |            | chr3:3167247:3235052:CD4p CD25- CD45RAp         |
| SELNC2  |        |    | ENST00    |         |            |       |            |          |      | chr3:31946 | Naive;chr3:3167559:3235215:CD4p CD25- II17-     |
| A100012 |        |    | 0006070   | noncodi | ENSG000002 | RP11- |            |          |      | 26-        | PMAstim Th;chr3:3190673:3235082:CD4 Memory      |
| 372     | 2.2558 | up | noncoding | 52      | ng         | 71870 | 97C16.1    | Reliable | 494  | 3195119:+  | Primary 7pool;chr3:3191066:3235177:CD8 primairy |

|         |        |    |           |         |         |            |           |          |      |                                                  |
|---------|--------|----|-----------|---------|---------|------------|-----------|----------|------|--------------------------------------------------|
| ASHG19  |        |    |           |         |         |            |           |          |      | chr7:1483916:1507349:Adrenal                     |
| SELNC2  |        |    |           | ENST00  |         |            |           |          |      | Gland;chr7:1486001:1507516:Spleen;chr7:1486213:1 |
| A100004 |        |    |           | 0006097 | noncodi | ENSG000002 | RP11-     |          |      | 515763:Colon Crypt                               |
| 698     | 2.1775 | up | noncoding | 55      | ng      | 73230      | 1246C19.1 | Reliable | 3026 | 3;chr7:1486269:1507327:Sigmoid                   |
|         |        |    |           |         |         |            |           |          |      | Colon;chr7:1486352:1514892:Esophagus;chr7:14870  |
|         |        |    |           |         |         |            |           |          |      | 24:1514387:Gastric;chr7:1489958:1514795:Colon    |
|         |        |    |           |         |         |            |           |          |      | Crypt 1;chr7:1494100:1514700:Colon Crypt         |
|         |        |    |           |         |         |            |           |          |      | 2;chr7:1494178:1514569:VACO                      |
|         |        |    |           |         |         |            |           |          |      | chr7:15041                                       |
|         |        |    |           |         |         |            |           |          |      | 400;chr7:1494491:1507434:Fetal Intestine         |
|         |        |    |           |         |         |            |           |          |      | 33-                                              |
|         |        |    |           |         |         |            |           |          |      | Large;chr7:1496273:1503283:K562;chr7:1496418:15  |
|         |        |    |           |         |         |            |           |          |      | 1507158:-                                        |
|         |        |    |           |         |         |            |           |          |      | 02047:CD34 adult                                 |

|         |        |      |           |         |         |            |            |      |     |                                                |
|---------|--------|------|-----------|---------|---------|------------|------------|------|-----|------------------------------------------------|
| ASHG19  |        |      |           |         |         |            |            |      |     | chr2:71289500:71312132:CD14;chr2:71289657:7131 |
| SELNC2  |        |      |           | ENST00  |         |            |            |      |     | 1762:CD20;chr2:71289943:71300709:Ly3;chr2:7129 |
| A100017 |        |      |           | 0004349 | noncodi | ENSG000002 |            |      |     | chr2:71229                                     |
| 434     | 2.7354 | down | noncoding | 90      | ng      | 36469      | AC007040.8 | Gold | 570 | 661-                                           |
|         |        |      |           |         |         |            |            |      |     | 0095:71300515:DHL6;chr2:71290265:71301717:Eso  |
|         |        |      |           |         |         |            |            |      |     | phagus;chr2:71290385:71301563:CD19             |
|         |        |      |           |         |         |            |            |      |     | 71291873:-                                     |
|         |        |      |           |         |         |            |            |      |     | Primary;chr2:71290494:71311637:Spleen          |

|         |        |      |           |        |         |            |       |  |      |                                                |
|---------|--------|------|-----------|--------|---------|------------|-------|--|------|------------------------------------------------|
| ASHG19  |        |      |           |        |         |            |       |  |      | chr1:11168                                     |
| SELNC2  |        |      |           |        |         |            |       |  |      | 2785-                                          |
| A100534 |        |      |           | NR_138 | noncodi | ENSG000001 |       |  |      | 111727726:                                     |
| 975     | 2.7915 | down | noncoding | 484    | ng      | 34255      | CEPT1 |  | 2408 | chr1:111658932:111700441:CD20;chr1:111667233:1 |
|         |        |      |           |        |         |            |       |  |      | + 11691882:Tonsil;chr1:111668533:111685066:Ly3 |

ASHG19  
 SELNC2  
 A100534 NR\_138 noncodi ENSG000001  
 975 2.7915 down noncoding 484 ng 34255 CEPT1

2408

chr1:111707042:111752758:CD20;chr1:111720465:1  
 11773369:CD4p CD25- CD45RAp  
 Naive;chr1:111720877:111748580:Adipose  
 Nuclei;chr1:111721356:111773351:CD4p CD25-  
 Il17- PMAstim Th;chr1:111721546:111771793:CD8  
 primary;chr1:111722467:111770686:CD56;chr1:111  
 722584:111771572:CD3;chr1:111724894:111769353  
 :CD4 Memory Primary  
 7pool;chr1:111725046:111766110:CD14;chr1:11172  
 5074:111771067:CD4p CD25- CD45ROp  
 Memory;chr1:111727706:111778392:DND41;chr1:11  
 1730652:111771012:CD8 Naive  
 8pool;chr1:111730953:111769306:CD4p CD25-  
 Il17p PMAstim  
 Th17;chr1:111731924:111786958:Spleen;chr1:11173  
 2684:111775273:Tonsil;chr1:111732689:111766358:  
 Sigmoid Colon;chr1:111732755:111766318:Small  
 Intestine;chr1:111734292:111748221:Gastric;chr1:11  
 1734374:111769514:GM12878;chr1:111734461:111  
 748269:Esophagus;chr1:111734723:111748126:Colo  
 n Crypt 2;chr1:111734737:111768995:CD19  
 Primary;chr1:111734752:111768907:CD4p  
 CD225int CD127p  
 Tmem;chr1:111734884:111769467:CD8 Memory  
 7pool;chr1:111734917:111772142:Fetal  
 Thymus;chr1:111734952:111769864:CD4 Naive  
 chr1:11168 Primary 8pool;chr1:111735057:111770041:CD8  
 2785- Naive 7pool;chr1:111735190:111768994:CD4  
 111727726: Memory Primary  
 + 8pool;chr1:111735195:111775083:Ly1;chr1:1117352

|         |        |    |           |         |         |            |             |          |      |            |                                                   |
|---------|--------|----|-----------|---------|---------|------------|-------------|----------|------|------------|---------------------------------------------------|
| ASHG19  |        |    |           |         |         |            |             |          |      | chr5:13356 | chr5:133554238:133583971:Skeletal                 |
| SELNC2  |        |    |           | ENST00  |         |            |             |          |      | 2101-      | Muscle;chr5:133558980:133563313:CD4p CD25-        |
| A100013 |        |    |           | 0006029 | noncodi | ENSG000002 | CTD-        |          |      | 133563518: | Il17p PMAstim                                     |
| 127     | 2.1068 | up | noncoding | 19      | ng      | 70177      | 2410N18.3   | Reliable | 1418 | +          | Th17;chr5:133559389:133592083:Left Ventricle      |
|         |        |    |           |         |         |            |             |          |      |            | chr20:34651707:34655126:VACO                      |
|         |        |    |           |         |         |            |             |          |      |            | 503;chr20:34651941:34686940:Esophagus;chr20:346   |
|         |        |    |           |         |         |            |             |          |      |            | 52078:34694626:Colon Crypt                        |
|         |        |    |           |         |         |            |             |          |      |            | 3;chr20:34667259:34691804:HeLa;chr20:34668921:3   |
|         |        |    |           |         |         |            |             |          |      |            | 4721786:VACO                                      |
|         |        |    |           |         |         |            |             |          |      |            | 503;chr20:34670504:34711458:Gastric;chr20:346728  |
|         |        |    |           |         |         |            |             |          |      |            | 65:34711004:Sigmoid                               |
|         |        |    |           |         |         |            |             |          |      |            | Colon;chr20:34672908:34711170:Colon Crypt         |
|         |        |    |           |         |         |            |             |          |      |            | 1;chr20:34673151:34720941:Colon Crypt             |
|         |        |    |           |         |         |            |             |          |      |            | 2;chr20:34679127:34746032:Adipose                 |
| ASHG19  |        |    |           |         |         |            |             |          |      | chr20:3466 | Nuclei;chr20:34679509:34694907:Pancreas;chr20:346 |
| SELNC2  |        |    |           | ENST00  |         |            |             |          |      | 0363-      | 80074:34731861:Ly4;chr20:34730341:34785517:Adr    |
| A100052 |        |    |           | 0004306 | noncodi | ENSG000002 |             |          |      | 34662831:+ | enal Gland                                        |
| 488     | 2.3065 | up | noncoding | 79      | ng      | 34139      | RP4-550H1.4 |          | 458  |            |                                                   |
| ASHG19  |        |    |           |         |         |            |             |          |      | chr5:51971 |                                                   |
| SELNC2  |        |    |           | ENST00  |         |            |             |          |      | 027-       | chr5:52000414:52040505:DND41;chr5:52005413:52     |
| A100012 |        |    |           | 0005029 | noncodi | ENSG000002 | CTD-        |          |      | 52083860:- | 040298:Jurkat                                     |
| 947     | 4.427  | up | noncoding | 95      | ng      | 48898      | 2288O8.1    | Reliable | 593  |            |                                                   |
|         |        |    |           |         |         |            |             |          |      |            | chr5:52052598:52138481:Adipose                    |
|         |        |    |           |         |         |            |             |          |      |            | Nuclei;chr5:52069539:52160201:Spleen;chr5:520822  |
|         |        |    |           |         |         |            |             |          |      |            | 16:52172660:Duodenum Smooth                       |
| ASHG19  |        |    |           |         |         |            |             |          |      | chr5:51971 | Muscle;chr5:52093242:52106729:IMR90;chr5:52094    |
| SELNC2  |        |    |           | ENST00  |         |            |             |          |      | 027-       | 567:52106662:NHLF;chr5:52132254:52162287:IMR      |
| A100012 |        |    |           | 0005029 | noncodi | ENSG000002 | CTD-        |          |      | 52083860:- | 90                                                |
| 947     | 4.427  | up | noncoding | 95      | ng      | 48898      | 2288O8.1    | Reliable | 593  |            |                                                   |



|         |        |    |           |         |            |       |             |          |      |            |                                                 |
|---------|--------|----|-----------|---------|------------|-------|-------------|----------|------|------------|-------------------------------------------------|
| ASHG19  |        |    |           |         |            |       |             |          |      | chr17:3685 | Intestine;chr17:36881476:36907973:Colon Crypt   |
| SELNC2  |        |    | ENST00    |         |            |       |             |          |      | 8705-      | 1;chr17:36883977:36907951:Lung;chr17:36886485:3 |
| A100013 |        |    | 0005638   | noncodi | ENSG000002 |       |             |          |      | 36861000:+ | 6906657:Pancreas;chr17:36886615:36890751:LNCaP  |
| 855     | 2.8802 | up | noncoding | 97      | ng         | 61005 | CTB-58E17.1 | Reliable | 2296 |            |                                                 |

chr17:36841485:368604155:Spleen;chr17:3684954:36863638:Left  
Ventricle;chr17:36849416:36867442:Fetal  
Muscle;chr17:36849427:36868217:Lung;chr17:36849443:36863581:Small  
Intestine;chr17:36849446:36869721:Right  
Atrium;chr17:36849486:36864348:Sigmoid  
Colon;chr17:36849658:36862895:Right  
Ventricle;chr17:36849707:36864129:Gastric;chr17:36852020:36863435:MM1S;chr17:36852687:36863936:Tonsil;chr17:36854835:36891315:CD4p CD25-Il17p PMAstim  
Th17;chr17:36854933:36891548:CD4p CD25- Il17-PMAstim  
Th;chr17:36856374:36863732:Ly3;chr17:36856433:36863910:CD56;chr17:36856888:36888783:CD8  
primary;chr17:36857029:36864323:Pancreatic islets;chr17:36857157:36863577:Esophagus;chr17:36857165:36863536:Adrenal  
Gland;chr17:36857173:36861522:K562;chr17:36857186:36861774:HeLa;chr17:36857283:36862851:Pancreas;chr17:36857283:36862900:VACO  
9m;chr17:36857336:36862962:Thymus;chr17:36857431:36876540:VACO  
503;chr17:36880595:36907474:Gastric;chr17:36880935:36900163:Colon Crypt  
2;chr17:36881475:36907782:Small



|         |        |      |           |         |            |            |           |      |   |                                                                                                                                                                                                                                                                                                                                                                                                                                                                                                                                                                                                                                                                                                                                                                                                                                                                                                                                                                                                                                                                                                                    |
|---------|--------|------|-----------|---------|------------|------------|-----------|------|---|--------------------------------------------------------------------------------------------------------------------------------------------------------------------------------------------------------------------------------------------------------------------------------------------------------------------------------------------------------------------------------------------------------------------------------------------------------------------------------------------------------------------------------------------------------------------------------------------------------------------------------------------------------------------------------------------------------------------------------------------------------------------------------------------------------------------------------------------------------------------------------------------------------------------------------------------------------------------------------------------------------------------------------------------------------------------------------------------------------------------|
| ASHG19  |        |      |           |         |            |            |           |      |   | chr1:20518342/:205322469:101edo;chr1:205195003:205257756:Brain Inferior Temporal Lobe;chr1:205195303:205291843:Brain Hippocampus Middle;chr1:205195357:205255709:Brain Cingulate Gyrus;chr1:205195435:205256085:Brain Hippocampus Middle 150;chr1:205198707:205257315:Brain Anterior Caudate;chr1:205198731:205254801:Brain Angular Gyrus;chr1:205212503:205240648:Brain Mid Frontal Lobe;chr1:205216538:205294796:Pancreatic islets;chr1:205226962:205289498:Osteoblasts;chr1:205242037:205294994:HBL1;chr1:205242169:205295027:Ly1;chr1:205242236:205295022:Ly3;chr1:205242267:205294889:DHL6;chr1:205242326:205284722:Ly4;chr1:205242383:205291943:CD20;chr1:205242393:205294944:Tonsil;chr1:205242416:205289483:Sigmoid Colon;chr1:205242795:205294653:VACO 400;chr1:205244073:205289461:Small Intestine;chr1:205244127:205289484:Esophagus;chr1:205244180:205263684:Thymus;chr1:205252499:205258684:MM1S;chr1:205252644:205288278:H1;chr1:205252675:205289470:Spleen;chr1:205252877:205284629:IMR90;chr1:205252917:205296755:u87;chr1:205253201:205283802:Astrocytes;chr1:205253543:205294850:Fetal Intestine |
| SELNC2  |        |      | ENCT00    |         |            |            |           |      |   | 0559- Large;chr1:205267271:205294703:Pancreas;chr1:205265599: 270131:205289265:LNCaP;chr1:205305762:205355411:Ovary                                                                                                                                                                                                                                                                                                                                                                                                                                                                                                                                                                                                                                                                                                                                                                                                                                                                                                                                                                                                |
| A100017 |        |      | 0000367   | noncodi | CATG000000 | CATG000000 |           |      |   |                                                                                                                                                                                                                                                                                                                                                                                                                                                                                                                                                                                                                                                                                                                                                                                                                                                                                                                                                                                                                                                                                                                    |
| 831     | 7.6401 | down | noncoding | 85      | ng         | 90897      | 90897.1   | 1470 | - |                                                                                                                                                                                                                                                                                                                                                                                                                                                                                                                                                                                                                                                                                                                                                                                                                                                                                                                                                                                                                                                                                                                    |
| ASHG19  |        |      |           |         |            |            |           |      |   | chr8:145517464:145548516:Adrenal Gland;chr8:145519520:145562137:HCT-116;chr8:145536383:145555666:Colon Crypt 3;chr8:145536386:145551382:Small Intestine;chr8:145537471:145550558:Colon Crypt 1;chr8:145537473:145555571:Colon Crypt 2                                                                                                                                                                                                                                                                                                                                                                                                                                                                                                                                                                                                                                                                                                                                                                                                                                                                              |
| SELNC2  |        |      | ENST00    |         |            |            |           |      |   | chr8:145538801: 145538801: Intestine;chr8:145537471:145550558:Colon Crypt 1;chr8:145537473:145555571:Colon Crypt 2                                                                                                                                                                                                                                                                                                                                                                                                                                                                                                                                                                                                                                                                                                                                                                                                                                                                                                                                                                                                 |
| A100006 |        |      | 0005250   | noncodi | ENSG000002 | GS1-       |           |      |   |                                                                                                                                                                                                                                                                                                                                                                                                                                                                                                                                                                                                                                                                                                                                                                                                                                                                                                                                                                                                                                                                                                                    |
| 843     | 3.6245 | up   | noncoding | 23      | ng         | 54690      | 393G12.12 | 444  | - |                                                                                                                                                                                                                                                                                                                                                                                                                                                                                                                                                                                                                                                                                                                                                                                                                                                                                                                                                                                                                                                                                                                    |

ASHG19  
 SELNC2  
 A100004  
 083 3.2857 down noncoding 826 ng 62028 CATG000000 CATG000000  
 1747

chr3:141012280:141141298:u87;chr3:141029873:141089855:Fetal Intestine  
 Large;chr3:141029943:141089529:Fetal Intestine;chr3:141049278:141207535:Osteoblasts;chr3:141071097:141089363:K562;chr3:141079002:141162760:Brain Hippocampus  
 Middle;chr3:141079164:141144945:HBL1;chr3:141079175:141160355:MM1S;chr3:141079314:141089545:HSMtube;chr3:141079331:141151807:Brain Anterior Caudate;chr3:141079389:141162728:Brain Inferior Temporal  
 Lobe;chr3:141079392:141161781:Brain Hippocampus Middle  
 150;chr3:141079393:141151934:Brain Angular Gyrus;chr3:141079404:141170275:Aorta;chr3:141079417:141168709:IMR90;chr3:141079427:141159821:Brain Cingulate  
 Gyrus;chr3:141079440:141175901:Small Intestine;chr3:141079477:141089627:HUVEC;chr3:141079503:141132303:GM12878;chr3:141079528:141103947:Astrocytes;chr3:141079553:141134828:Tonsil;chr3:141079598:141089459:NHLF;chr3:141079660:141089224:HSMM;chr3:141079674:141089224:Skeletal Muscle  
 Myoblast;chr3:141083519:141136674:NHDF-Ad;chr3:141083866:141089271:HMEC;chr3:141084544:141132639:NHEK;chr3:141084779:141146409:CD8 Memory  
 141177086: 7pool;chr3:141084784:141088680:VACO  
 9m;chr3:141084789:141146536:CD4 Memory

ASHG19  
 SELNC2  
 A100007  
 729 2.1894 up noncoding 18 ng 72993 RP11-  
 196G18.24 Reliable 671

chr1:149800185:149800359:NC1-  
 H82;chr1:149800302:149806721:Stomach Smooth  
 Muscle;chr1:149800343:149806744:Fetal  
 Thymus;chr1:149800366:149806664:Duodenum  
 Smooth  
 Muscle;chr1:149800408:149836226:Panc1;chr1:1498  
 01218:149806733:Fetal  
 Muscle;chr1:149801461:149806380:Fetal Intestine  
 Large;chr1:149801554:149806661:Fetal  
 Intestine;chr1:149801661:149805683:Small  
 Intestine;chr1:149801665:149807694:CD4 Memory  
 Primary  
 7pool;chr1:149801740:149806764:HeLa;chr1:149801  
 747:149806411:NHEK;chr1:149801769:149806231:  
 Spleen;chr1:149801785:149806372:Sigmoid  
 Colon;chr1:149801798:149806278:Esophagus;chr1:1  
 49801803:149805524:Right  
 Atrium;chr1:149801810:149805853:Left  
 Ventricle;chr1:149801815:149805529:Lung;chr1:149  
 801950:149806735:HCC1954;chr1:149801975:1498  
 05417:Gastric;chr1:149802018:149806664:CD8  
 Memory  
 7pool;chr1:149802074:149806387:K562;chr1:149802  
 097:149805677:Thymus;chr1:149802251:149806522  
 :CD4 Memory Primary  
 8pool;chr1:149802448:149806583:CD8 Naive  
 chr1:14981 7pool;chr1:149802939:149806808:CD4 Naive  
 7383- Primary 8pool;chr1:149807697:149814294:NCI-  
 149818053: H82;chr1:149808078:149815957:K562;chr1:1498087  
 + 45:149816200:HeLa;chr1:149808786:149818154:Fet

|         |        |    |           |         |            |       |            |            |                                          |
|---------|--------|----|-----------|---------|------------|-------|------------|------------|------------------------------------------|
| ASHG19  |        |    |           |         |            |       |            |            |                                          |
| SELNC2  |        |    | ENST00    |         |            |       |            | chr7:43548 |                                          |
| A100013 |        |    | 0004361   | noncodi | ENSG000002 |       |            | 327-       |                                          |
| 551     | 2.0194 | up | noncoding | 05      | ng         | 31638 | AC011738.4 | 2916       | 43562141:- chr7:43546657:43562481:Jurkat |

|         |        |      |           |         |         |            |            |      |   |  |  |                                                                                                                                                                                                                                                                                                                                                                                                                                                                                                                                                       |
|---------|--------|------|-----------|---------|---------|------------|------------|------|---|--|--|-------------------------------------------------------------------------------------------------------------------------------------------------------------------------------------------------------------------------------------------------------------------------------------------------------------------------------------------------------------------------------------------------------------------------------------------------------------------------------------------------------------------------------------------------------|
| ASHG19  |        |      |           |         |         |            |            |      |   |  |  | chr3:149159355:149198593:Osteoblasts;chr3:149160169:149226975:HSMMtube;chr3:149160625:149193347:HSMM;chr3:149192850:149381018:Panc1;chr3:149244777:149377700:HUVEC;chr3:149245212:149377188:Osteoblasts;chr3:149245536:149334284:Fetal Muscle;chr3:149246067:149274411:HMEC;chr3:149248327:149340070:HSMMtube;chr3:149249990:149340241:u87;chr3:149251990:149274195:Astrocytes;chr3:149289875:149307448:Astrocytes;chr3:149289900:149307910:NHLF;chr3:149289997:149304831:NHEK;chr3:149290104:149307572:HMEC;chr3:149290708:149324824:Skeletal Muscle |
| SELNC2  |        |      |           | FTMT2   |         |            |            |      |   |  |  | chr3:149160771-Myoblast;chr3:149290708:149324889:HSMM;chr3:149334685:149378399:Aorta;chr3:149351458:149379149161935:446:Stomach Smooth Muscle;chr3:149357660:149377280:HepG2                                                                                                                                                                                                                                                                                                                                                                          |
| A100002 |        |      |           | 1200007 | noncodi | CATG000000 | CATG000000 |      |   |  |  |                                                                                                                                                                                                                                                                                                                                                                                                                                                                                                                                                       |
| 493     | 5.6398 | down | noncoding | 268     | ng      | 62183      | 62183.1    | 1165 | + |  |  |                                                                                                                                                                                                                                                                                                                                                                                                                                                                                                                                                       |

|         |        |    |         |         |            |            |          |      |            |                                                                                                                             |
|---------|--------|----|---------|---------|------------|------------|----------|------|------------|-----------------------------------------------------------------------------------------------------------------------------|
| ASHG19  |        |    |         |         |            |            |          |      | chr7:55154 | chr7:55154:5498044:Pancreatic islets;chr7:5397267:5470493:CD34 Primary                                                      |
| SELNC2  |        |    | ENST00  |         |            |            |          |      |            | RO01536;chr7:5420053:5470212:CD34 Primary                                                                                   |
| A100000 |        |    | 0004442 | noncodi | ENSG000002 |            |          |      |            | RO01549;chr7:5420083:5482855:CD14;chr7:5424510:5470587:Colon Crypt                                                          |
| 378     | 5.5976 | up | 10      | ng      | 30733      | AC092171.4 | Reliable | 3251 | 5519442:+  | 3;chr7:5434456:5470607:Colon Crypt                                                                                          |
|         |        |    |         |         |            |            |          |      |            | 2;chr7:5434488:5470641:Colon Crypt                                                                                          |
|         |        |    |         |         |            |            |          |      |            | 1;chr7:5434559:5470799:HCT-116;chr7:5435840:5470621:Sigmoid                                                                 |
|         |        |    |         |         |            |            |          |      |            | Colon;chr7:5435847:5470623:Brain Anterior                                                                                   |
|         |        |    |         |         |            |            |          |      |            | Caudate;chr7:5435875:5470729:Lung;chr7:5435973:5470680:Esophagus;chr7:5435995:5470579:Gastric;chr7:5436159:5480069:VACO     |
|         |        |    |         |         |            |            |          |      |            | 400;chr7:5446568:5470510:Ovary;chr7:5446579:5470318:Aorta;chr7:5450705:5471544:Pancl;chr7:5452374:5498183:Brain Hippocampus |
|         |        |    |         |         |            |            |          |      |            | Middle;chr7:5452391:5482021:Spleen;chr7:5456781:5470293:Duodenum Smooth                                                     |
|         |        |    |         |         |            |            |          |      |            | Muscle;chr7:5456797:5470794:Stomach Smooth                                                                                  |
|         |        |    |         |         |            |            |          |      |            | Muscle;chr7:5456932:5470951:Fetal Intestine                                                                                 |
|         |        |    |         |         |            |            |          |      |            | Large;chr7:5456956:5470903:Brain Inferior Temporal Lobe;chr7:5456988:5470596:Right                                          |
|         |        |    |         |         |            |            |          |      |            | Atrium;chr7:5457003:5470597:Small                                                                                           |
|         |        |    |         |         |            |            |          |      |            | Intestine;chr7:5457008:5470544:VACO                                                                                         |
|         |        |    |         |         |            |            |          |      |            | 503;chr7:5457011:5470824:Brain Cingulate                                                                                    |
|         |        |    |         |         |            |            |          |      |            | Gyrus;chr7:5457048:5470208:Brain Hippocampus                                                                                |
|         |        |    |         |         |            |            |          |      |            | Middle 150;chr7:5457056:5470456:Psoas                                                                                       |
|         |        |    |         |         |            |            |          |      |            | Muscle;chr7:5457070:5470750:Fetal                                                                                           |
|         |        |    |         |         |            |            |          |      |            | Intestine;chr7:5457083:5470669:CD34 Primary                                                                                 |
|         |        |    |         |         |            |            |          |      |            | RO01480;chr7:5457084:5478285:Left                                                                                           |

|         |        |      |           |         |            |            |         |      |   |                                                                                                                                                                                                                                                                                                                                                                                                                                                                                                                                                                                                                                                                                                                                                                                                                                                                                                                                                                 |
|---------|--------|------|-----------|---------|------------|------------|---------|------|---|-----------------------------------------------------------------------------------------------------------------------------------------------------------------------------------------------------------------------------------------------------------------------------------------------------------------------------------------------------------------------------------------------------------------------------------------------------------------------------------------------------------------------------------------------------------------------------------------------------------------------------------------------------------------------------------------------------------------------------------------------------------------------------------------------------------------------------------------------------------------------------------------------------------------------------------------------------------------|
| ASHG19  |        |      |           |         |            |            |         |      |   | chr8:129147244:129191727:MCF-7;chr8:129153748:129219173:HCC1954;chr8:129158962:129219148:Ly3;chr8:129159080:129218964:HB1;chr8:129163751:129203247:HSMMtube;chr8:129165089:129210112:u87;chr8:129179300:129198539:HUVEC;chr8:129179447:129215108:Osteoblasts;chr8:129179643:129210014:Skeletal Muscle Myoblast;chr8:129179643:129210119:HSMM;chr8:129179715:129198151:NHEK;chr8:129179902:129194492-8300:NHDF-                                                                                                                                                                                                                                                                                                                                                                                                                                                                                                                                                  |
| SELNC2  |        |      | ENCT00    |         |            |            |         |      |   | chr8:129154492-8300:NHDF-                                                                                                                                                                                                                                                                                                                                                                                                                                                                                                                                                                                                                                                                                                                                                                                                                                                                                                                                       |
| A100010 |        |      | 0004304   | noncodi | CATG000001 | CATG000001 |         |      |   | 129156182: Ad;chr8:129179996:129198145:HMEC;chr8:129180089:129198014:Astrocytes                                                                                                                                                                                                                                                                                                                                                                                                                                                                                                                                                                                                                                                                                                                                                                                                                                                                                 |
| 217     | 2.0799 | up   | noncoding | 94      | ng         | 00853      | 00853.1 | 1691 | + | chr15:74206556:74230296:LNCaP;chr15:74213348:74225141:u87;chr15:74213376:74258891:Osteoblasts;chr15:74213387:74247399:Aorta;chr15:74213452:74250776:NHDF-Ad;chr15:74213638:74234284:IMR90;chr15:74214230:74282055:Pancreatic islets;chr15:74214460:74249890:NHLF;chr15:74214625:74258665:HSMMtube;chr15:74215187:74249875:Astrocytes;chr15:74215781:74257985:HSMM;chr15:74215847:74257892:Skeletal Muscle Myoblast;chr15:74242859:74301215:Tonsil;chr15:74243131:74300516:Ly3;chr15:74272874:74305861:Adipose Nuclei;chr15:74273370:74285288:HSMMtube;chr15:74273452:74305486:Stomach Smooth Muscle;chr15:74273515:74290001:Fetal Muscle;chr15:74273575:74285697:Left Ventricle;chr15:74273682:74344709:Spleen;chr15:74273688:74304323:Esophagus;chr15:74273721:74318349:Lung;chr15:74273767:74304358:Small Intestine;chr15:74273774:74285497:Right Atrium;chr15:74273803:74304414:Sigmoid Colon;chr15:74273819:74304427:Gastric;chr15:74273850:74300796:Thymus |
| ASHG19  |        |      |           |         |            |            |         |      |   | chr15:74249438-74250660:+                                                                                                                                                                                                                                                                                                                                                                                                                                                                                                                                                                                                                                                                                                                                                                                                                                                                                                                                       |
| SELNC2  |        |      | FTMT2     |         |            |            |         |      |   | chr15:74249438-74250660:+                                                                                                                                                                                                                                                                                                                                                                                                                                                                                                                                                                                                                                                                                                                                                                                                                                                                                                                                       |
| A100014 |        |      | 6000002   | noncodi | CATG000000 | CATG000000 |         |      |   | chr15:74249438-74250660:+                                                                                                                                                                                                                                                                                                                                                                                                                                                                                                                                                                                                                                                                                                                                                                                                                                                                                                                                       |
| 690     | 6.697  | down | noncoding | 861     | ng         | 23598      | 23598.1 | 1223 |   | chr15:74249438-74250660:+                                                                                                                                                                                                                                                                                                                                                                                                                                                                                                                                                                                                                                                                                                                                                                                                                                                                                                                                       |

|         |        |    |           |         |         |            |          |  |     |  |  |            |                           |
|---------|--------|----|-----------|---------|---------|------------|----------|--|-----|--|--|------------|---------------------------|
| ASHG19  |        |    |           |         |         |            |          |  |     |  |  |            |                           |
| SELNC2  |        |    |           | ENST00  |         |            |          |  |     |  |  | chr5:25415 |                           |
| A100017 |        |    |           | 0005079 | noncodi | ENSG000002 | CTD-     |  |     |  |  | 755-       |                           |
| 499     | 3.1319 | up | noncoding | 26      | ng      | 48605      | 2306M5.1 |  | 369 |  |  | 25446016:- | chr5:25443805:25449125:H1 |

|         |        |      |           |        |         |            |          |      |      |  |  |            |                                                 |
|---------|--------|------|-----------|--------|---------|------------|----------|------|------|--|--|------------|-------------------------------------------------|
| ASHG19  |        |      |           |        |         |            |          |      |      |  |  |            | chr8:10679                                      |
| SELNC2  |        |      |           |        |         |            |          |      |      |  |  | 2638-      |                                                 |
| A101371 |        |      |           | NR_125 | noncodi | ENSG000002 | RP11-    |      |      |  |  | 107072731: | chr8:107056599:107074501:u87;chr8:107057040:107 |
| 129     | 3.1341 | down | noncoding | 796    | ng      | 51003      | 152P17.2 | Gold | 1011 |  |  | -          | 074578:Astrocytes                               |

|         |        |    |           |         |         |            |            |          |     |  |  |           |                              |
|---------|--------|----|-----------|---------|---------|------------|------------|----------|-----|--|--|-----------|------------------------------|
| ASHG19  |        |    |           |         |         |            |            |          |     |  |  |           | chr19:7584                   |
| SELNC2  |        |    |           | ENST00  |         |            |            |          |     |  |  | 802-      |                              |
| A100021 |        |    |           | 0006020 | noncodi | ENSG000002 | CTD-       |          |     |  |  | 7585346:- | chr19:7585325:7611185:Spleen |
| 876     | 2.2022 | up | noncoding | 83      | ng      | 69371      | 2207O23.11 | Reliable | 293 |  |  |           |                              |



|         |        |      |           |         |         |            |             |          |     |                                                       |
|---------|--------|------|-----------|---------|---------|------------|-------------|----------|-----|-------------------------------------------------------|
| ASHG19  |        |      |           |         |         |            |             |          |     | chr7:10043                                            |
| SELNC2  |        |      |           | ENST00  |         |            |             |          |     | 4936- chr7:100398301:100435555:Spleen;chr7:100398420: |
| A100018 |        |      |           | 0004127 | noncodi | ENSG000002 | RP11-       |          |     | 100450238: 100435525:Adrenal                          |
| 732     | 4.0753 | down | noncoding | 54      | ng      | 36305      | 126L15.4    |          | 369 | - Gland;chr7:100398433:100434682:VACO 400             |
|         |        |      |           |         |         |            |             |          |     | chr6:112420456:112652968:Adipose                      |
|         |        |      |           |         |         |            |             |          |     | Nuclei;chr6:112470164:112485340:Ly4;chr6:112500       |
|         |        |      |           |         |         |            |             |          |     | 019:112620911:Stomach Smooth                          |
|         |        |      |           |         |         |            |             |          |     | Muscle;chr6:112509677:112576958:Osteoblasts;chr6:     |
|         |        |      |           |         |         |            |             |          |     | 112514688:112620667:Left                              |
|         |        |      |           |         |         |            |             |          |     | Ventricle;chr6:112519021:112620635:Lung;chr6:112      |
|         |        |      |           |         |         |            |             |          |     | 522254:112559801:u87;chr6:112523069:112576655:        |
|         |        |      |           |         |         |            |             |          |     | HUVEC;chr6:112523347:112576763:Duodenum               |
|         |        |      |           |         |         |            |             |          |     | Smooth                                                |
|         |        |      |           |         |         |            |             |          |     | Muscle;chr6:112523670:112576170:NHLF;chr6:1125        |
| ASHG19  |        |      |           |         |         |            |             |          |     | chr6:11255                                            |
| SELNC2  |        |      |           | ENST00  |         |            |             |          |     | 23883:112620772:Fetal                                 |
| A100017 |        |      |           | 0006055 | noncodi | ENSG000002 |             |          |     | 5366- Muscle;chr6:112538109:112590572:Right           |
| 013     | 2.4806 | down | noncoding | 86      | ng      | 71208      | RP1-142L7.8 | Reliable | 594 | 112555959: Atrium;chr6:112541266:112576548:NHDF-      |
|         |        |      |           |         |         |            |             |          |     | - Ad;chr6:112589629:112633990:u87                     |



|         |        |      |           |         |         |            |            |      |                                                                                                                                                                                                                                                                                                                                                                                       |
|---------|--------|------|-----------|---------|---------|------------|------------|------|---------------------------------------------------------------------------------------------------------------------------------------------------------------------------------------------------------------------------------------------------------------------------------------------------------------------------------------------------------------------------------------|
| ASHG19  |        |      |           |         |         |            |            |      | chr11:68572105:68625963:LNCaP;chr11:68577606:68637837:Colon Crypt                                                                                                                                                                                                                                                                                                                     |
| SELNC2  |        |      |           | ENST00  |         |            |            |      | 1;chr11:68577679:68625778:Colon Crypt                                                                                                                                                                                                                                                                                                                                                 |
| A100009 |        |      |           | 0005122 | noncodi | ENSG000002 | RP11-      |      | 2;chr11:68577695:68637841:Colon Crypt                                                                                                                                                                                                                                                                                                                                                 |
| 069     | 2.4862 | up   | noncoding | 00      | ng      | 50508      | 757G1.6    | 3252 | 3;chr11:68579709:68625996:Sigmoid Colon;chr11:68579710:68625902:Small Intestine;chr11:68584405:68611583:CD34 Primary RO01536;chr11:68592374:68626326:Fetal Intestine Large;chr11:68592393:68645914:Fetal Intestine;chr11:68592674:68623405:Gastric;chr11:68595052:68623717:Lung;chr11:68595181:68623887:Spleen;chr11:68600031:68623081:Adrenal Gland;chr11:68604978:68623116:Pancreas |
| ASHG19  |        |      |           |         |         |            |            |      | chr2:98326092:98361442:CD4p CD25- CD45RAp Naive;chr2:98326429:98345268:Jurkat;chr2:98326885:98363002:CD4p CD25- Il17- PMAstim Th;chr2:98326948:98359916:CD4p CD25- Il17p PMAstim Th17;chr2:98328532:98359877:CD4p                                                                                                                                                                     |
| SELNC2  |        |      |           | FTMT2   |         |            |            |      | chr2:98368                                                                                                                                                                                                                                                                                                                                                                            |
| A100665 |        |      |           | 0800005 | noncodi | CATG000000 | CATG000000 |      | 166- CD25- CD45ROp                                                                                                                                                                                                                                                                                                                                                                    |
| 124     | 2.7941 | down | noncoding | 640     | ng      | 43882      | 43882.1    | 3773 | 98371938:+ Memory;chr2:98328558:98363442:CD8 primairy;chr2:98328565:98379215:CD56                                                                                                                                                                                                                                                                                                     |

|         |        |      |           |         |            |          |          |          |      |                                                                                                                                                                                                                                                                                                                                                                                                                                                                                                                                                                                                                                                                                                                                                                                                                                                                                                                                                                                                                      |
|---------|--------|------|-----------|---------|------------|----------|----------|----------|------|----------------------------------------------------------------------------------------------------------------------------------------------------------------------------------------------------------------------------------------------------------------------------------------------------------------------------------------------------------------------------------------------------------------------------------------------------------------------------------------------------------------------------------------------------------------------------------------------------------------------------------------------------------------------------------------------------------------------------------------------------------------------------------------------------------------------------------------------------------------------------------------------------------------------------------------------------------------------------------------------------------------------|
| ASHG19  |        |      |           |         |            |          |          |          |      | chr17:406638403:40664452:Ovary;chr17:40660248:40690755:Aorta;chr17:40662787:40684718:Adipose Nuclei;chr17:40663804:40684677:Lung;chr17:40663811:40707842:Fetal Intestine Large;chr17:40663838:40684603:Left Ventricle;chr17:40663902:40684665:Right Atrium;chr17:40663925:40684645:Adrenal Gland;chr17:40663951:40684552:Stomach Smooth Muscle;chr17:40663953:40684495:Bladder;chr17:40663957:40709176:Brain Cingulate Gyrus;chr17:40663974:40708609:Brain Anterior Caudate;chr17:40663987:40708660:Brain Hippocampus Middle 150;chr17:40664061:40684631:Spleen;chr17:40664121:40675620:IMR90;chr17:40664744:40676005:Duodenum Smooth Muscle;chr17:40665081:40709281:Brain Inferior Temporal Lobe;chr17:40669175:40679696:Osteoblasts;chr17:40669185:40676001:Fetal Intestine;chr17:40669227:40707851:Fetal Muscle;chr17:40669248:40684649:u87;chr17:40669252:40684812:HUVEC;chr17:40669389:40675564:NHDF-Ad;chr17:40669427:40674802:Astrocytes;chr17:40669636:40674241:HSMM;chr17:40669650:40674227:Skeletal Muscle |
| SELNC2  |        |      | ENST00    |         |            |          |          |          |      | chr17:4070                                                                                                                                                                                                                                                                                                                                                                                                                                                                                                                                                                                                                                                                                                                                                                                                                                                                                                                                                                                                           |
| A100008 |        |      | 0005905   | noncodi | ENSG000002 | RP11-    |          |          |      | 4456-                                                                                                                                                                                                                                                                                                                                                                                                                                                                                                                                                                                                                                                                                                                                                                                                                                                                                                                                                                                                                |
| 453     | 2.4837 | up   | noncoding | 13      | ng         | 66962    | 400F19.6 | Reliable | 2311 | 40706766:-                                                                                                                                                                                                                                                                                                                                                                                                                                                                                                                                                                                                                                                                                                                                                                                                                                                                                                                                                                                                           |
|         |        |      |           |         |            |          |          |          |      | 3;chr17:40670048:40707606:VACO                                                                                                                                                                                                                                                                                                                                                                                                                                                                                                                                                                                                                                                                                                                                                                                                                                                                                                                                                                                       |
| ASHG19  |        |      |           |         |            |          |          |          |      | chr13:1001                                                                                                                                                                                                                                                                                                                                                                                                                                                                                                                                                                                                                                                                                                                                                                                                                                                                                                                                                                                                           |
| SELNC2  |        |      |           |         |            |          |          |          |      | 43729-                                                                                                                                                                                                                                                                                                                                                                                                                                                                                                                                                                                                                                                                                                                                                                                                                                                                                                                                                                                                               |
| A100012 |        |      | uc001vo   | noncodi |            |          |          |          |      | 100148992:                                                                                                                                                                                                                                                                                                                                                                                                                                                                                                                                                                                                                                                                                                                                                                                                                                                                                                                                                                                                           |
| 410     | 2.0561 | down | noncoding | i.1     | ng         | AK123584 | AK123584 |          | 2796 | -                                                                                                                                                                                                                                                                                                                                                                                                                                                                                                                                                                                                                                                                                                                                                                                                                                                                                                                                                                                                                    |
|         |        |      |           |         |            |          |          |          |      | chr13:100136209:100160564:Spleen                                                                                                                                                                                                                                                                                                                                                                                                                                                                                                                                                                                                                                                                                                                                                                                                                                                                                                                                                                                     |

|         |        |    |           |         |         |            |             |          |                                                                                                                                                                                                                                                                                                                                                                                                                                                                                                                                                                                                                                                                                                                                                                                                                                                                                                                                                                                                                                                                                                                                                                                    |
|---------|--------|----|-----------|---------|---------|------------|-------------|----------|------------------------------------------------------------------------------------------------------------------------------------------------------------------------------------------------------------------------------------------------------------------------------------------------------------------------------------------------------------------------------------------------------------------------------------------------------------------------------------------------------------------------------------------------------------------------------------------------------------------------------------------------------------------------------------------------------------------------------------------------------------------------------------------------------------------------------------------------------------------------------------------------------------------------------------------------------------------------------------------------------------------------------------------------------------------------------------------------------------------------------------------------------------------------------------|
|         |        |    |           |         |         |            |             |          | chr22:46455801:46456015:Brain Hippocampus<br>Middle;chr22:46436214:46442955:Esophagus;chr22:<br>46436313:46491627:Adipose<br>Nuclei;chr22:46438115:46491495:Brain<br>Hippocampus Middle<br>150;chr22:46445235:46456789:Brain Inferior<br>Temporal Lobe;chr22:46445301:46456148:Brain<br>Cingulate Gyrus;chr22:46445359:46455879:Brain<br>Anterior<br>Caudate;chr22:46445515:46454339:Lung;chr22:4644<br>5530:46452765:Sigmoid<br>Colon;chr22:46445533:46455726:Esophagus;chr22:4<br>6445547:46452979:Gastric;chr22:46445554:4645570<br>7:Spleen;chr22:46445556:46455580:Right<br>Atrium;chr22:46445577:46455681:Left<br>Ventricle;chr22:46445655:46452991:Adrenal<br>Gland;chr22:46445832:46455465:Tonsil;chr22:46447<br>381:46491318:HSMMtube;chr22:46447605:4646695<br>5:Panc1;chr22:46447789:46491244:Osteoblasts;chr22<br>:46447835:46473232:HCC1954;chr22:46447871:464<br>52600:LNCaP;chr22:46447891:46457293:NHDF-<br>Ad;chr22:46447955:46455571:NHLF;chr22:4644805<br>8:46467049:HMEC;chr22:46448292:46457565:u87;c<br>hr22:46451541:46485670:Bladder;chr22:46451675:4<br>6485305:VACO<br>9m;chr22:46451678:46486798:Right<br>Ventricle;chr22:46451711:46485813:Colon Crypt |
| ASHG19  |        |    |           | ENST00  |         |            |             |          | chr22:4645                                                                                                                                                                                                                                                                                                                                                                                                                                                                                                                                                                                                                                                                                                                                                                                                                                                                                                                                                                                                                                                                                                                                                                         |
| SELNC2  |        |    |           | 0004394 | noncodi | ENSG000002 |             |          | 1620-                                                                                                                                                                                                                                                                                                                                                                                                                                                                                                                                                                                                                                                                                                                                                                                                                                                                                                                                                                                                                                                                                                                                                                              |
| A100015 |        |    |           | 0004394 | noncodi | ENSG000002 |             |          | RO01549;chr22:46452808:46469830:Ly3;chr22:4645                                                                                                                                                                                                                                                                                                                                                                                                                                                                                                                                                                                                                                                                                                                                                                                                                                                                                                                                                                                                                                                                                                                                     |
| 043     | 3.929  | up | noncoding | 23      | ng      | 31010      | RP6-109B7.2 | 1181     | 46454040:-                                                                                                                                                                                                                                                                                                                                                                                                                                                                                                                                                                                                                                                                                                                                                                                                                                                                                                                                                                                                                                                                                                                                                                         |
|         |        |    |           |         |         |            |             |          | 3193:46473350:CD34 Primary                                                                                                                                                                                                                                                                                                                                                                                                                                                                                                                                                                                                                                                                                                                                                                                                                                                                                                                                                                                                                                                                                                                                                         |
| ASHG19  |        |    |           | ENST00  |         |            |             |          | chr4:15258                                                                                                                                                                                                                                                                                                                                                                                                                                                                                                                                                                                                                                                                                                                                                                                                                                                                                                                                                                                                                                                                                                                                                                         |
| SELNC2  |        |    |           | 0005086 | noncodi | ENSG000002 | RP11-       |          | 8376-                                                                                                                                                                                                                                                                                                                                                                                                                                                                                                                                                                                                                                                                                                                                                                                                                                                                                                                                                                                                                                                                                                                                                                              |
| A100000 |        |    |           | 0005086 | noncodi | ENSG000002 | RP11-       |          | 152591654:                                                                                                                                                                                                                                                                                                                                                                                                                                                                                                                                                                                                                                                                                                                                                                                                                                                                                                                                                                                                                                                                                                                                                                         |
| 592     | 3.8019 | up | noncoding | 64      | ng      | 51603      | 164P12.4    | Reliable | 304                                                                                                                                                                                                                                                                                                                                                                                                                                                                                                                                                                                                                                                                                                                                                                                                                                                                                                                                                                                                                                                                                                                                                                                |
|         |        |    |           |         |         |            |             |          | + chr4:152586171:152617153:Right Atrium                                                                                                                                                                                                                                                                                                                                                                                                                                                                                                                                                                                                                                                                                                                                                                                                                                                                                                                                                                                                                                                                                                                                            |

ASHG19  
 SELNC2 MICT00  
 A100389 0002100 noncodi CATG000000 CATG000000  
 223 2.7783 up noncoding 59 ng 51936 51936.1 5242

chr2:235147238:235176281:Panc1;chr2:235149098:2  
 35171441:HMEC;chr2:235149154:235169603:u87;c  
 hr2:235149154:235171269:NHEK;chr2:235149185:2  
 35167891:Astrocytes;chr2:235149305:235168785:Os  
 teoblasts;chr2:235149781:235169008:VACO  
 9m;chr2:235152068:235210364:DND41;chr2:235175  
 304:235203223:Jurkat;chr2:235180344:235222848:C  
 D56;chr2:235180686:235222778:CD8  
 primairy;chr2:235181359:235203307:CD4p CD25-  
 Il17p PMAstim  
 Th17;chr2:235187186:235203787:CD4 Naive  
 Primary 8pool;chr2:235196775:235218846:CD4p  
 CD25- CD45ROp  
 Memory;chr2:235196776:235219293:CD4p CD25-  
 Il17- PMAstim  
 Th;chr2:235196855:235233139:CD4p CD25-  
 CD45RAp Naive;chr2:235197112:235218282:CD4p  
 CD225int CD127p  
 Tmem;chr2:235197115:235203529:CD4 Memory  
 Primary  
 7pool;chr2:235197255:235218330:CD3;chr2:235197  
 260:235203385:CD8 Memory  
 chr2:23515 7pool;chr2:235197417:235203263:CD8 Naive  
 6750- 8pool;chr2:235197495:235202520:CD8 Naive  
 235199271: 7pool;chr2:235197813:235203468:CD4 Naive  
 - Primary 7pool

|         |        |    |           |         |         |            |          |          |      |            |                                                  |  |
|---------|--------|----|-----------|---------|---------|------------|----------|----------|------|------------|--------------------------------------------------|--|
| ASHG19  |        |    |           |         |         |            |          |          |      |            |                                                  |  |
| SELNC2  |        |    |           | ENST00  |         |            |          |          |      | chr16:3056 | chr16:3054493:3060932:Fetal                      |  |
| A100016 |        |    |           | 0006077 | noncodi | ENSG000002 | LA16c-   |          |      | 121-       | Intestine;chr16:3054567:3061001:Fetal Intestine  |  |
| 215     | 12.237 | up | noncoding | 94      | ng      | 72079      | 380H5.5  | Reliable | 1266 | 3057386:+  | Large;chr16:3056482:3059299:H1                   |  |
| ASHG19  |        |    |           |         |         |            |          |          |      |            |                                                  |  |
| SELNC2  |        |    |           | ENST00  |         |            |          |          |      | chr2:11464 | chr2:114611623:114730851:CD20;chr2:114615840:1   |  |
| A100009 |        |    |           | 0006027 | noncodi | ENSG000002 | RP11-    |          |      | 5780-      | 14655649:Tonsil;chr2:114633162:114690904:CD4p    |  |
| 233     | 2.0943 | up | noncoding | 60      | ng      | 70019      | 141B14.1 |          | 1548 | 114647327: | CD25- II17- PMAstim                              |  |
|         |        |    |           |         |         |            |          |          |      | -          | Th;chr2:114634615:114682279:CD14                 |  |
|         |        |    |           |         |         |            |          |          |      |            | chr18:8702720:8802804:Stomach Smooth             |  |
|         |        |    |           |         |         |            |          |          |      |            | Muscle;chr18:8704022:8758139:Ly1;chr18:8727827:  |  |
|         |        |    |           |         |         |            |          |          |      |            | 8752563:HUVEC;chr18:8744562:8767510:NHDF-        |  |
|         |        |    |           |         |         |            |          |          |      |            | Ad;chr18:8745183:8753936:IMR90;chr18:8777013:8   |  |
|         |        |    |           |         |         |            |          |          |      |            | 815112:HUVEC;chr18:8793031:8814089:NHDF-         |  |
|         |        |    |           |         |         |            |          |          |      |            | Ad;chr18:8793964:8814684:Astrocytes;chr18:879412 |  |
| ASHG19  |        |    |           |         |         |            |          |          |      | chr18:8695 | 7:8813331:NHLF;chr18:8796711:8814572:IMR90;ch    |  |
| SELNC2  |        |    |           | ENST00  |         |            |          |          |      | 854-       | r18:8798740:8802517:HSMM;chr18:8798876:88024     |  |
| A100010 |        |    |           | 0005793 | noncodi | ENSG000002 | RP11-    |          |      | 8707619:-  | 32:Skeletal Muscle Myoblast                      |  |
| 774     | 2.7739 | up | noncoding | 68      | ng      | 65962      | 674N23.1 |          | 818  |            |                                                  |  |

ASHG19  
 SELNC2 ENST00  
 A100005 0005503 noncodi ENSG000002  
 309 9.6877 down noncoding 19 ng 58096 RP11-474P2.2 Reliable 627

ASHG19  
 SELNC2 ENST00  
 A100974 0005004 noncodi ENSG000002  
 679 2.315 up noncoding 47 ng 47095 MIR210HG 1965

chr12:46745509:46780090:Adipose  
 Nuclei;chr12:46750690:46781406:HMEC;chr12:46750696:46801411:Osteoblasts;chr12:46750818:46797247:NHEK;chr12:46751076:46781994:Left Ventricle;chr12:46752905:46785767:CD20;chr12:46754023:46782918:CD14;chr12:46754278:46783404:CD19  
 Primary;chr12:46755152:46786747:Pancl;chr12:46758395:46797876:Duodenum Smooth Muscle;chr12:46758596:46785607:HUVVEC;chr12:46758835:46779688:Brain Hippocampus Middle 150;chr12:46759700:46781118:CD4 Memory Primary  
 7pool;chr12:46760895:46797996:HeLa;chr12:46760905:46783619:NHDF- Ad;chr12:46760966:46798138:NHLF;chr12:46761022:46798920:Tonsil;chr12:46761111:46785610:Skeletal Muscle;chr12:46761122:46795854:Lung;chr12:46761154:46781460:CD34 Primary  
 RO01536;chr12:46761219:46797045:Colon Crypt 1;chr12:46761973:46778834:CD34 Primary  
 RO01480;chr12:46762301:46780693:HCT-116;chr12:46762605:46799048:IMR90;chr12:46762740:46799125:Astrocytes;chr12:46762818:46799053:HSMM;chr12:46763090:46784642:Colon Crypt 3;chr12:46763376:46781577:u87;chr12:46763621:46798940:Skeletal Muscle  
 5246- Myoblast;chr12:46763715:46785789:Toledo;chr12:46767561:+ 6763765:46785105:Fetal

chr11:5656 chr11:541055:566158:Colon Crypt  
 60-568420:- 2;chr11:558473:564521:Colon Crypt 3



|         |        |    |           |         |         |            |         |          |     |                                                             |
|---------|--------|----|-----------|---------|---------|------------|---------|----------|-----|-------------------------------------------------------------|
| ASHG19  |        |    |           |         |         |            |         |          |     | chr1:150940653:150952254:Adrenal                            |
| SELNC2  |        |    |           | ENST00  |         |            |         |          |     | chr1:15094                                                  |
| A100005 |        |    |           | 0004128 | noncodi | ENSG000002 | RP11-   |          |     | Gland;chr1:150942608:150952428:HepG2;chr1:1509              |
| 830     | 2.6302 | up | noncoding | 38      | ng      | 31073      | 316M1.3 | Reliable | 368 | 5599- 43271:150956639:VACO                                  |
|         |        |    |           |         |         |            |         |          |     | 150948010: 400;chr1:150943284:150956638:Pancreas;chr1:15094 |
|         |        |    |           |         |         |            |         |          |     | + 4158:150952463:K562                                       |

|         |        |      |           |         |         |            |            |  |     |                                               |
|---------|--------|------|-----------|---------|---------|------------|------------|--|-----|-----------------------------------------------|
| ASHG19  |        |      |           |         |         |            |            |  |     | chr2:16995                                    |
| SELNC2  |        |      |           | ENST00  |         |            |            |  |     | 7253-                                         |
| A100008 |        |      |           | 0004321 | noncodi | ENSG000002 |            |  |     | 169957720:                                    |
| 952     | 4.4434 | down | noncoding | 33      | ng      | 35321      | AC007556.3 |  | 307 | + chr2:169927476:169967083:HBL1               |
|         |        |      |           |         |         |            |            |  |     | chr8:126122373:126165172:NHEK;chr8:126122465: |
|         |        |      |           |         |         |            |            |  |     | 126166429:HCT-                                |

|         |        |    |           |        |         |            |        |  |      |                                                         |
|---------|--------|----|-----------|--------|---------|------------|--------|--|------|---------------------------------------------------------|
| ASHG19  |        |    |           |        |         |            |        |  |      | chr8:12610                                              |
| SELNC2  |        |    |           |        |         |            |        |  |      | Large;chr8:126180450:126252726:HCT-                     |
| A101204 |        |    |           | NR_146 | noncodi | ENSG000001 |        |  |      | 4065- 116;chr8:126224966:126243260:NHEK;chr8:126225     |
| 393     | 2.3311 | up | noncoding | 191    | ng      | 56831      | NSMCE2 |  | 1379 | 126379367: 015:126245341:HMEC;chr8:126230124:126245806: |
|         |        |    |           |        |         |            |        |  |      | + CD14                                                  |

|         |        |    |           |        |         |            |        |  |      |                                                          |
|---------|--------|----|-----------|--------|---------|------------|--------|--|------|----------------------------------------------------------|
| ASHG19  |        |    |           |        |         |            |        |  |      | chr8:12610                                               |
| SELNC2  |        |    |           |        |         |            |        |  |      | 4065- chr8:126270470:126321395:HCT-                      |
| A101204 |        |    |           | NR_146 | noncodi | ENSG000001 |        |  |      | 126379367: 116;chr8:126274580:126316300:MM1S;chr8:126285 |
| 393     | 2.3311 | up | noncoding | 191    | ng      | 56831      | NSMCE2 |  | 1379 | + 860:126307851:Jurkat                                   |





|         |        |    |           |         |         |            |             |            |                                                                                          |                                    |                                                 |
|---------|--------|----|-----------|---------|---------|------------|-------------|------------|------------------------------------------------------------------------------------------|------------------------------------|-------------------------------------------------|
| ASHG19  |        |    |           |         |         |            |             |            | chr12:46909532:46955601:MM1S;chr12:46916854:46968424:HSMMtube;chr12:46940092:46957831:HM |                                    |                                                 |
| SELNC2  |        |    |           | ENST00  |         |            |             | chr12:4693 | 2:46957464:NHEK;chr12:46940196:46952685:IMR9                                             |                                    |                                                 |
| A100018 |        |    |           | 0006073 | noncodi | ENSG000002 | RP11-       | 1285-      | 0;chr12:46940207:46957640:Osteoblasts;chr12:4694                                         |                                    |                                                 |
| 490     | 2.0122 | up | noncoding | 53      | ng      | 72369      | 446N19.1    | Reliable   | 448                                                                                      | 47046333:+                         | 0240:46958128:u87;chr12:46940255:46958244:HeLa  |
|         |        |    |           |         |         |            |             |            |                                                                                          |                                    | chr14:106134703:106178820:Toledo;chr14:10614307 |
|         |        |    |           |         |         |            |             |            |                                                                                          |                                    | 2:106180530:CD20;chr14:106144201:106215700:C    |
|         |        |    |           |         |         |            |             |            |                                                                                          |                                    | D19                                             |
|         |        |    |           |         |         |            |             |            |                                                                                          |                                    | Primary;chr14:106144863:106176282:GM12878;chr1  |
|         |        |    |           |         |         |            |             |            |                                                                                          |                                    | 4:106145079:106173688:MM1S;chr14:106145131:1    |
|         |        |    |           |         |         |            |             |            |                                                                                          |                                    | 06177266:CD56;chr14:106145141:106176987:Sigm    |
|         |        |    |           |         |         |            |             |            |                                                                                          |                                    | oid                                             |
|         |        |    |           |         |         |            |             |            |                                                                                          |                                    | Colon;chr14:106145254:106173704:Spleen;chr14:10 |
|         |        |    |           |         |         |            |             |            |                                                                                          |                                    | 6145575:106171606:H2171;chr14:106145712:10617   |
| ASHG19  |        |    |           |         |         |            |             | chr14:1061 | 6054:Small                                                                               |                                    |                                                 |
| SELNC2  |        |    |           | ENST00  |         |            |             | 70301-     | Intestine;chr14:106146139:106178977:Tonsil;chr14:1                                       |                                    |                                                 |
| A100017 |        |    |           | 0004978 | noncodi | ENSG000002 |             | 106170939: | 06146296:106177340:DHL6;chr14:106148019:10616                                            |                                    |                                                 |
| 561     | 2.1954 | up | noncoding | 72      | ng      | 53701      | AL928768.3  | -          | 9399:Ly4                                                                                 |                                    |                                                 |
|         |        |    |           |         |         |            |             |            |                                                                                          |                                    | chr4:89194528:89207593:CD20;chr4:89202585:8920  |
|         |        |    |           |         |         |            |             |            |                                                                                          |                                    | 7138:CD4 Memory Primary                         |
| ASHG19  |        |    |           |         |         |            |             |            |                                                                                          |                                    | 7pool;chr4:89203005:89207053:CD8 Naive          |
| SELNC2  |        |    |           | ENST00  |         |            |             | chr4:89206 | 7pool;chr4:89203229:89206883:CD4 Naive Primary                                           |                                    |                                                 |
| A100012 |        |    |           | 0005000 | noncodi | ENSG000002 |             | 094-       | 7pool;chr4:89203439:89207065:Fetal                                                       |                                    |                                                 |
| 187     | 3.0687 | up | noncoding | 09      | ng      | 46375      | RP11-10L7.1 | 1654       | 89252573:+                                                                               | Muscle;chr4:89203835:89219912:Lung |                                                 |

|         |        |    |           |        |         |            |             |      |     |   |                                    |
|---------|--------|----|-----------|--------|---------|------------|-------------|------|-----|---|------------------------------------|
| ASHG19  |        |    |           |        |         |            |             |      |     |   | chr8:10387                         |
| SELNC2  |        |    |           |        |         |            |             |      |     |   | 6499-                              |
| A100062 |        |    |           | NR_126 | noncodi | ENSG000002 |             |      |     |   | 103990104:                         |
| 160     | 3.2198 | up | noncoding | 339    | ng      | 53320      | KB-1507C5.2 | Gold | 807 | + | chr8:103898697:103923636:RPMI-8402 |

|         |        |      |           |         |         |            |            |  |      |  |                                      |
|---------|--------|------|-----------|---------|---------|------------|------------|--|------|--|--------------------------------------|
| ASHG19  |        |      |           |         |         |            |            |  |      |  | chr6:14777                           |
| SELNC2  |        |      |           | FTMT2   |         |            |            |  |      |  | 961-                                 |
| A100015 |        |      |           | 2400001 | noncodi | CATG000000 | CATG000000 |  |      |  | 14779092:+ chr6:14777649:14799417:H1 |
| 521     | 3.7702 | down | noncoding | 414     | ng      | 82908      | 82908.1    |  | 1132 |  |                                      |

ASHG19  
 SELNC2  
 A100429  
 611 3.0814 down noncoding 98 56448 809N8.4

ENST00  
 0005425 noncodi  
 ENSG000002 RP11-

334

chr11:7311 Large;chr11:72998904:73072142:Osteoblasts;chr11:7  
 6342- 2999827:73046703:NHDF-  
 73121717:+ Ad;chr11:73016977:73056710:Brain Hippocampus

chr11:72750087:72901005:CD20;chr11:72840574:72  
 871204:Ly3;chr11:72846686:72901203:Spleen;chr11  
 :72847687:72869983:DHL6;chr11:72848179:728715  
 15:Tonsil;chr11:72848285:72870613:Toledo;chr11:7  
 2848432:72901825:Ly4;chr11:72848919:72865794:  
 CD34 Primary  
 RO01480;chr11:72849766:72866057:CD34 Primary  
 RO01536;chr11:72849904:72901275:Ly1;chr11:7284  
 9937:72901910:HBL1;chr11:72850008:72869679:Fe  
 tal  
 Muscle;chr11:72850207:72870983:GM12878;chr11:7  
 2850244:72889794:HSMMtube;chr11:72850428:728  
 70499:MM1S;chr11:72850431:72887707:Fetal  
 Intestine Large;chr11:72850513:72872020:CD19  
 Primary;chr11:72850594:72900096:Left  
 Ventricle;chr11:72851228:72894684:Lung;chr11:728  
 51301:72869995:Sigmoid  
 Colon;chr11:72851423:72870073:Aorta;chr11:72852  
 098:72865986:Thymus;chr11:72857024:72894861:R  
 ight Atrium;chr11:72857798:72889632:Right  
 Ventricle;chr11:72888015:72952042:Esophagus;chr1  
 1:72895515:72954355:CD14;chr11:72895962:72913  
 543:HCC1954;chr11:72916992:72952643:Psoas  
 Muscle;chr11:72923727:72952810:Skeletal  
 Muscle;chr11:72945387:73001156:Spleen;chr11:729  
 67487:73001255:HSMMtube;chr11:72977978:73001  
 095:Fetal Intestine



|         |        |      |           |         |         |            |            |  |            |                                                  |
|---------|--------|------|-----------|---------|---------|------------|------------|--|------------|--------------------------------------------------|
| ASHG19  |        |      |           |         |         |            |            |  |            | chr9:27329135:27504747:Brain Anterior            |
| SELNC2  |        |      |           | FTMT2   |         |            |            |  |            | Caudate;chr9:27329311:27370319:Brain Cingulate   |
| A100009 |        |      |           | 3400002 | noncodi | CATG000001 | CATG000001 |  |            | Gyrus;chr9:27332408:27370467:Brain Hippocampus   |
| 362     | 6.1037 | down | noncoding | 236     | ng      | 08059      | 08059.1    |  |            | Middle 150;chr9:27332486:27387544:Brain Inferior |
|         |        |      |           |         |         |            |            |  |            | Temporal Lobe;chr9:27332721:27370542:Brain       |
|         |        |      |           |         |         |            |            |  |            | Hippocampus Middle;chr9:27333147:27418143:Fetal  |
|         |        |      |           |         |         |            |            |  |            | Intestine;chr9:27333300:27369656:Brain Angular   |
|         |        |      |           |         |         |            |            |  |            | Gyrus;chr9:27333419:27369924:Ovary;chr9:2733726  |
|         |        |      |           |         |         |            |            |  |            | 2:27368749:Brain Mid Frontal                     |
|         |        |      |           |         |         |            |            |  |            | Lobe;chr9:27352664:27418216:Fetal Intestine      |
|         |        |      |           |         |         |            |            |  |            | Large;chr9:27385894:27461545:HMEC;chr9:273932    |
|         |        |      |           |         |         |            |            |  |            | 90:27448314:Brain Hippocampus Middle             |
|         |        |      |           |         |         |            |            |  |            | 150;chr9:27393803:27548644:Brain Cingulate       |
|         |        |      |           |         |         |            |            |  |            | Gyrus;chr9:27394013:27435005:Brain Angular       |
|         |        |      |           |         |         |            |            |  |            | Gyrus;chr9:27394386:27448375:Brain Hippocampus   |
|         |        |      |           |         |         |            |            |  |            | Middle;chr9:27402236:27452194:Brain Inferior     |
|         |        |      |           |         |         |            |            |  |            | Temporal Lobe;chr9:27430855:27488425:Fetal       |
|         |        |      |           |         |         |            |            |  | chr9:27598 | Intestine Large;chr9:27430983:27478425:Fetal     |
|         |        |      |           |         |         |            |            |  | 016-       | Intestine;chr9:27498149:27530621:NHEK;chr9:2752  |
|         |        |      |           |         |         |            |            |  | 27599223:- | 7724:27603332:CD14                               |



|         |        |    |           |         |         |            |          |          |     |                                                                                                                                                                                                                                         |
|---------|--------|----|-----------|---------|---------|------------|----------|----------|-----|-----------------------------------------------------------------------------------------------------------------------------------------------------------------------------------------------------------------------------------------|
| ASHG19  |        |    |           |         |         |            |          |          |     | chr1:179839958:179860126:CD20;chr1:179844669:179854441:NHEK;chr1:179849088:179853964:CD4 Memory Primary                                                                                                                                 |
| SELNC2  |        |    |           | ENST00  |         |            |          |          |     | 7pool;chr1:179849314:179880318:CD34 Primary                                                                                                                                                                                             |
| A100002 |        |    |           | 0006102 | noncodi | ENSG000002 | RP11-    |          |     | RO01536;chr1:179849391:179854038:CD8 Memory                                                                                                                                                                                             |
| 397     | 3.7235 | up | noncoding | 72      | ng      | 72906      | 533E19.7 | Reliable | 989 | 7pool;chr1:179849924:179854643:CD4p CD25-CD45ROp                                                                                                                                                                                        |
|         |        |    |           |         |         |            |          |          |     | Memory;chr1:179850026:179857966:CD4p CD25-II17- PMAstim Th;chr1:179850177:179854496:CD8 primiaary;chr1:179850202:179853726:CD4 Memory Primary 8pool;chr1:179850206:179854257:CD8 Naive 8pool;chr1:179850276:179853475:CD4 Naive Primary |
|         |        |    |           |         |         |            |          |          |     | 7pool;chr1:179850280:179854565:CD56;chr1:179850291:179853582:CD8 Naive                                                                                                                                                                  |
|         |        |    |           |         |         |            |          |          |     | 7pool;chr1:179850344:179853874:CD3;chr1:179850363:179854530:CD4 Naive Primary                                                                                                                                                           |
|         |        |    |           |         |         |            |          |          |     | 8pool;chr1:179850367:179857453:CD19                                                                                                                                                                                                     |
|         |        |    |           |         |         |            |          |          |     | chr1:179850742- Primary;chr1:179850439:179854256:CD4p CD25-II17p PMAstim                                                                                                                                                                |
|         |        |    |           |         |         |            |          |          |     | 179851730: Th17;chr1:179850474:179854145:CD4p CD225int                                                                                                                                                                                  |
|         |        |    |           |         |         |            |          |          |     | - CD127p Tmem                                                                                                                                                                                                                           |

|         |       |      |           |         |         |            |          |          |     |                                                                                                        |
|---------|-------|------|-----------|---------|---------|------------|----------|----------|-----|--------------------------------------------------------------------------------------------------------|
| ASHG19  |       |      |           |         |         |            |          |          |     | chr15:50123014:50159837:HeLa;chr15:50138719:50138719:50171586:Osteoblasts;chr15:50138790:50172005:IMR9 |
| SELNC2  |       |      |           | ENST00  |         |            |          |          |     | chr15:50172622- 0;chr15:50139165:50171542:NHDF-                                                        |
| A100338 |       |      |           | 0005581 | noncodi | ENSG000002 | CTD-     |          |     | 50175722:+ Ad;chr15:50166048:50210873:Adipose Nuclei                                                   |
| 406     | 2.214 | down | noncoding | 50      | ng      | 59188      | 2647E9.3 | Reliable | 520 |                                                                                                        |

ASHG19  
SELNC2  
A100020  
556 2.1895 up

noncoding 37  
ENST00  
0006101 noncodi  
ng 73196  
ENSG000002  
RP11-  
717A5.2

73

chr2:85610306:85674183:u87;chr2:85615286:856698  
64:CD14;chr2:85617835:85649228:DND41;chr2:856  
23138:85649311:Esophagus;chr2:85623502:8567440  
9:Lung;chr2:85623516:85673793:Small  
Intestine;chr2:85631788:85678391:H2171;chr2:8563  
2045:85666848:Panc1;chr2:85632068:85675124:HS  
MMtube;chr2:85632201:85674477:Sigmoid  
Colon;chr2:85635309:85675097:Brain Anterior  
Caudate;chr2:85635508:85675124:Brain  
Hippocampus Middle  
150;chr2:85639655:85698966:HeLa;chr2:85639667:8  
5673833:Gastric;chr2:85639748:85696795:HCT-  
116;chr2:85639942:85675051:Pancreatic  
islets;chr2:85640599:85666339:K562;chr2:85644628  
:85675281:Brain Hippocampus  
Middle;chr2:85644800:85648954:HepG2;chr2:85644  
802:85675152:Brain Inferior Temporal  
Lobe;chr2:85644821:85675289:Brain Cingulate  
Gyrus;chr2:85645069:85673833:Right  
Atrium;chr2:85645134:85674917:Brain Angular  
Gyrus;chr2:85645170:85676652:Pancreas;chr2:85645  
486:85665631:CD34  
chr2:85614 fetal;chr2:85645524:85674425:Brain Mid Frontal  
197- Lobe;chr2:85663480:85676787:Adrenal  
85614269:- Gland;chr2:85664354:85665949:Adipose Tissue

|         |       |      |           |         |         |            |         |     |  |            |
|---------|-------|------|-----------|---------|---------|------------|---------|-----|--|------------|
| ASHG19  |       |      |           |         |         |            |         |     |  | chr3:18070 |
| SUPERL  |       |      |           | ENST00  |         |            |         |     |  | 7558-      |
| NC2A10  |       |      |           | 0004872 | noncodi | ENSG000002 |         |     |  | 180775032: |
| 0018928 | 2.373 | down | noncoding | 40      | ng      | 42808      | SOX2-OT | 751 |  | +          |



|         |        |    |           |         |            |       |          |          |            |                                                     |
|---------|--------|----|-----------|---------|------------|-------|----------|----------|------------|-----------------------------------------------------|
| ASHG19  |        |    |           |         |            |       |          |          |            | chr12:29300482:29319315:CD34 Primary                |
| SELNC2  |        |    | ENST00    |         |            |       |          |          |            | RO01549;chr12:29300528:29319925:CD34 Primary        |
| A100000 |        |    | 0005530   | noncodi | ENSG000002 | RP11- |          |          | chr12:2929 | RO01536;chr12:29300531:29320008:CD34 Primary        |
| 660     | 2.6384 | up | noncoding | 75      | ng         | 57258 | 946L16.1 | Reliable | 593        | 6129- RO01480;chr12:29300779:29330669:CD14;chr12:29 |
|         |        |    |           |         |            |       |          |          |            | 29301608:- 301255:29303417:Colon Crypt 2            |

ASHG19  
 SELNC2  
 A101025 NR\_120 noncodi ENSG000002  
 937 2.4752 up noncoding 365 ng 59343 RP11-761I4.3 Gold 1077

chr15:81560841:81617674:CD4p CD25- CD45RAP  
 Naive;chr15:81567470:81610802:Tonsil;chr15:81567  
 732:81610103:CD4p CD25- Il17- PMAstim  
 Th;chr15:81568447:81607720:Thymus;chr15:815758  
 90:81617762:CD20;chr15:81576184:81624979:MM1  
 S;chr15:81576243:81605254:Toledo;chr15:81576278  
 :81610588:CD19  
 Primary;chr15:81576315:81609224:CD8  
 primary;chr15:81576349:81607275:CD14;chr15:815  
 76351:81605600:Ly1;chr15:81576441:81608661:Spl  
 een;chr15:81576460:81609122:CD8 Naive  
 7pool;chr15:81576519:81615707:Sigmoid  
 Colon;chr15:81576534:81615697:Small  
 Intestine;chr15:81576723:81609203:CD56;chr15:815  
 76780:81608956:CD8 Naive  
 8pool;chr15:81577272:81604284:CD4p CD25- Il17p  
 PMAstim Th17;chr15:81577407:81600449:CD4p  
 CD25- CD45ROp  
 Memory;chr15:81577413:81604746:CD4 Naive  
 Primary 7pool;chr15:81577667:81605046:Fetal  
 Thymus;chr15:81577957:81599266:CD4 Memory  
 Primary  
 7pool;chr15:81578040:81598967:CD3;chr15:815782  
 70:81597142:CD4p CD225int CD127p  
 Tmem;chr15:81578540:81596395:CD8 Memory  
 7pool;chr15:81578571:81608318:CD4 Naive Primary  
 chr15:8161 8pool;chr15:81583158:81611021:Ly3;chr15:8158333  
 6674- 4:81595850:CD4 Memory Primary  
 81735417:+ 8pool;chr15:81595978:81631354:NHDF-Ad

|         |        |      |           |         |         |            |            |  |     |                                                                                                                                                                                                                                                                                                                                                                                                                                                                                                                                                                                                                                                       |
|---------|--------|------|-----------|---------|---------|------------|------------|--|-----|-------------------------------------------------------------------------------------------------------------------------------------------------------------------------------------------------------------------------------------------------------------------------------------------------------------------------------------------------------------------------------------------------------------------------------------------------------------------------------------------------------------------------------------------------------------------------------------------------------------------------------------------------------|
| ASHG19  |        |      |           |         |         |            |            |  |     | chr21:47368269:47414613:Aorta;chr21:47368978:47399878:Fetal Muscle;chr21:47370640:47418875:Stomach Smooth Muscle;chr21:47373022:47488156:Ovary;chr21:47373188:47425562:NHDF-Ad;chr21:47373962:47413579:Lung;chr21:47390790:47421807:Esophagus;chr21:47390883:47405694:Bladder;chr21:47390890:47405005:NHLF;chr21:47441142:47554313:NHDF-Ad;chr21:47441234:47488057:Sigmoid Colon;chr21:47441247:47488321:Fetal Muscle;chr21:47441257:47531436:Esophagus;chr21:47444324:47564240:Osteoblasts;chr21:47444870:47513373:Astrocytes;chr21:47447910:47520896:NHLF;chr21:47457705:47513717:u87;chr21:47458019:47488324:Aorta;chr21:47468502:47488351:Stomach |
| SELNC2  |        |      |           | ENST00  |         |            |            |  |     | chr21:4747                                                                                                                                                                                                                                                                                                                                                                                                                                                                                                                                                                                                                                            |
| A100019 |        |      |           | 0004295 | noncodi | ENSG000002 |            |  |     | 2510-                                                                                                                                                                                                                                                                                                                                                                                                                                                                                                                                                                                                                                                 |
| 746     | 2.4916 | down | noncoding | 12      | ng      | 28235      | AP001476.4 |  | 415 | 47473019:+ 08616:47554180:Stomach Smooth Muscle;chr21:47468608:47520268:IMR90;chr21:475                                                                                                                                                                                                                                                                                                                                                                                                                                                                                                                                                               |

|         |        |      |           |         |         |            |             |  |     |                                  |
|---------|--------|------|-----------|---------|---------|------------|-------------|--|-----|----------------------------------|
| ASHG19  |        |      |           |         |         |            |             |  |     | chr6:13227                       |
| SELNC2  |        |      |           | ENST00  |         |            |             |  |     | 2086-                            |
| A100015 |        |      |           | 0004352 | noncodi | ENSG000002 |             |  |     | 132398533:                       |
| 769     | 2.4073 | down | noncoding | 87      | ng      | 27220      | RP11-69I8.3 |  | 495 | + chr6:132267550:132277507:HUVEC |

|         |        |      |           |         |         |            |             |  |     |                                  |
|---------|--------|------|-----------|---------|---------|------------|-------------|--|-----|----------------------------------|
| ASHG19  |        |      |           |         |         |            |             |  |     | chr6:13227                       |
| SELNC2  |        |      |           | ENST00  |         |            |             |  |     | 2086-                            |
| A100015 |        |      |           | 0004352 | noncodi | ENSG000002 |             |  |     | 132398533:                       |
| 769     | 2.4073 | down | noncoding | 87      | ng      | 27220      | RP11-69I8.3 |  | 495 | + chr6:132380411:132409826:HUVEC |

|         |        |      |           |         |         |            |          |          |      |                                                   |
|---------|--------|------|-----------|---------|---------|------------|----------|----------|------|---------------------------------------------------|
| ASHG19  |        |      |           |         |         |            |          |          |      | chr15:48826879:48877845:Fetal                     |
| SELNC2  |        |      |           | ENST00  |         |            |          |          |      | Muscle;chr15:48827549:48879734:Adipose            |
| A100009 |        |      |           | 0005580 | noncodi | ENSG000002 | RP11-    |          |      | Nuclei;chr15:48827729:48939777:Osteoblasts;chr15: |
| 973     | 2.5952 | down | noncoding | 61      | ng      | 59705      | 227D13.1 | Reliable | 1943 | 48827840:48895741:HSMMtube;chr15:48827922:48      |
|         |        |      |           |         |         |            |          |          |      | 886063:HSMM;chr15:48828108:48860209:Skeletal      |
|         |        |      |           |         |         |            |          |          |      | Muscle Myoblast;chr15:48828210:48897197:NHDF-     |
|         |        |      |           |         |         |            |          |          |      | Ad;chr15:48829461:48896062:NHLF;chr15:4889370     |
|         |        |      |           |         |         |            |          |          |      | 7:48965905:Adipose                                |
|         |        |      |           |         |         |            |          |          |      | Nuclei;chr15:48914213:48939235:NHDF-              |
|         |        |      |           |         |         |            |          |          |      | chr15:4893                                        |
|         |        |      |           |         |         |            |          |          |      | Ad;chr15:48919316:48938986:Astrocytes;chr15:4895  |
|         |        |      |           |         |         |            |          |          |      | 8148-                                             |
|         |        |      |           |         |         |            |          |          |      | 8694:48996557:Osteoblasts;chr15:48959207:490181   |
|         |        |      |           |         |         |            |          |          |      | 48944213:+                                        |
|         |        |      |           |         |         |            |          |          |      | 61:u87;chr15:48959692:48988676:Astrocytes         |

|         |        |    |           |         |         |            |          |      |      |                                                  |
|---------|--------|----|-----------|---------|---------|------------|----------|------|------|--------------------------------------------------|
| ASHG19  |        |    |           |         |         |            |          |      |      |                                                  |
| SELNC2  |        |    |           |         |         |            |          |      |      | chr2:25015                                       |
| A101296 |        |    |           | NR_136  | noncodi | ENSG000001 |          |      |      | 984-                                             |
| 549     | 2.1039 | up | noncoding | 182     | ng      | 38092      | CENPO    |      | 4234 | 25045245:+                                       |
|         |        |    |           |         |         |            |          |      |      | chr2:25013117:25042062:K562                      |
|         |        |    |           |         |         |            |          |      |      | chr8:81933177:81982485:HSMMtube;chr8:81933554    |
|         |        |    |           |         |         |            |          |      |      | :81964092:HSMM;chr8:81933648:81990327:u87;chr    |
|         |        |    |           |         |         |            |          |      |      | 8:81933714:81949507:Skeletal Muscle              |
|         |        |    |           |         |         |            |          |      |      | Myoblast;chr8:81972164:82025418:CD4p CD25-       |
|         |        |    |           |         |         |            |          |      |      | Il17- PMAstim                                    |
|         |        |    |           |         |         |            |          |      |      | Th;chr8:81972743:82025379:Tonsil;chr8:81972782:8 |
|         |        |    |           |         |         |            |          |      |      | 2025268:CD4p CD25- Il17p PMAstim                 |
|         |        |    |           |         |         |            |          |      |      | Th17;chr8:81973555:82025340:CD8                  |
|         |        |    |           |         |         |            |          |      |      | primary;chr8:81976027:82025174:DHL6;chr8:81976   |
|         |        |    |           |         |         |            |          |      |      | 630:82025097:Ly1;chr8:81992109:82025086:CD4      |
|         |        |    |           |         |         |            |          |      |      | Naive Primary                                    |
| ASHG19  |        |    |           |         |         |            |          |      |      | chr8:81949                                       |
| SELNC2  |        |    |           | ENST00  |         |            |          |      |      | 8pool;chr8:82004756:82067740:DND41;chr8:820049   |
| A100018 |        |    |           | 0005183 | noncodi | ENSG000002 | RP11-    |      |      | 199-                                             |
| 341     | 2.0557 | up | noncoding | 02      | ng      | 54060      | 172E10.1 | Gold | 545  | 23:82066597:Jurkat;chr8:82005108:82074527:Spleen |
|         |        |    |           |         |         |            |          |      |      | ;chr8:82039455:82074688:CD14                     |



|         |        |      |           |         |         |          |          |          |      |                                                    |
|---------|--------|------|-----------|---------|---------|----------|----------|----------|------|----------------------------------------------------|
| ASHG19  |        |      |           |         |         |          |          |          |      | chr9:71031513:71125151:Stomach Smooth              |
| SELNC2  |        |      |           |         |         |          |          |          |      | chr9:71150 Muscle;chr9:71031835:71124316:Right     |
| A100012 |        |      |           | uc004ag | noncodi |          |          |          |      | 806- Atrium;chr9:71050822:71176451:Duodenum Smooth |
| 411     | 3.4038 | down | noncoding | s.1     | ng      | AK130904 | AK130904 | Reliable | 3865 | 71154670:+ Muscle;chr9:71120258:71181035:CD14      |

|         |        |      |           |         |         |            |             |          |     |                                                   |
|---------|--------|------|-----------|---------|---------|------------|-------------|----------|-----|---------------------------------------------------|
| ASHG19  |        |      |           |         |         |            |             |          |     | chr19:47103218:47109496:Pancreatic                |
| SELNC2  |        |      |           | ENST00  |         |            |             |          |     | islets;chr19:47103267:47107798:Colon Crypt        |
| A100005 |        |      |           | 0005976 | noncodi | ENSG000002 |             |          |     | chr19:4711 1;chr19:47103338:47120213:Colon Crypt  |
| 405     | 6.1464 | down | noncoding | 09      | ng      | 69292      | CTB-12A17.3 | Reliable | 296 | 2534- 2;chr19:47103442:47123428:CD4 Naive Primary |
|         |        |      |           |         |         |            |             |          |     | 47114036:- 7pool;chr19:47122887:47130350:Aorta    |

|         |       |    |           |         |         |            |              |          |     |                                                           |
|---------|-------|----|-----------|---------|---------|------------|--------------|----------|-----|-----------------------------------------------------------|
| ASHG19  |       |    |           |         |         |            |              |          |     | chr1:10136                                                |
| SELNC2  |       |    |           | ENST00  |         |            |              |          |     | 0484-                                                     |
| A100012 |       |    |           | 0006092 | noncodi | ENSG000002 |              |          |     | 101360912: chr1:101359021:101363256:HeLa;chr1:101359538:1 |
| 387     | 2.846 | up | noncoding | 47      | ng      | 73204      | RP4-549L20.3 | Reliable | 429 | + 01363446:CD8 primiry                                    |

|         |        |      |           |         |         |            |          |      |     |                                 |
|---------|--------|------|-----------|---------|---------|------------|----------|------|-----|---------------------------------|
| ASHG19  |        |      |           |         |         |            |          |      |     | chr3:18208                      |
| SELNC2  |        |      |           | ENST00  |         |            |          |      |     | 2935-                           |
| A100002 |        |      |           | 0004738 | noncodi | ENSG000002 | RP11-    |      |     | 182086044:                      |
| 934     | 2.4457 | down | noncoding | 93      | ng      | 42012      | 338L18.1 | Gold | 328 | + chr3:182085910:182115627:MM1S |

|         |        |    |           |         |         |            |            |          |     |                                                                                          |
|---------|--------|----|-----------|---------|---------|------------|------------|----------|-----|------------------------------------------------------------------------------------------|
| ASHG19  |        |    |           |         |         |            |            |          |     | chr11:59303935:59334687:CD8 Memory                                                       |
| SELNC2  |        |    |           | ENST00  |         |            |            |          |     | 7pool;chr11:59304004:59334736:CD4 Memory                                                 |
| A100013 |        |    |           | 0005335 | noncodi | ENSG000002 |            |          |     | Primary 7pool;chr11:59304097:59334448:CD34                                               |
| 008     | 2.2443 | up | noncoding | 52      | ng      | 55008      | AP000442.4 | Reliable | 769 | chr11:5932<br>8619-<br>59333547:-                                                        |
|         |        |    |           |         |         |            |            |          |     | Primary<br>RO01536;chr11:59304100:59334146:K562;chr11:59<br>316606:59334199:Fetal Muscle |

|         |        |      |           |         |         |            |           |  |      |            |
|---------|--------|------|-----------|---------|---------|------------|-----------|--|------|------------|
| ASHG19  |        |      |           |         |         |            |           |  |      | chr5:13948 |
| SUPERL  |        |      |           | ENST00  |         |            |           |  |      | 2507-      |
| NC2A10  |        |      |           | 0004992 | noncodi | ENSG000002 |           |  |      | 139487228: |
| 0007718 | 2.7376 | down | noncoding | 03      | ng      | 45146      | LINC01024 |  | 2769 | -          |

|         |        |    |           |         |            |            |           |      |   |                                                                                                                                                                                                                                                                                                                                                                                                                     |
|---------|--------|----|-----------|---------|------------|------------|-----------|------|---|---------------------------------------------------------------------------------------------------------------------------------------------------------------------------------------------------------------------------------------------------------------------------------------------------------------------------------------------------------------------------------------------------------------------|
| ASHG19  |        |    |           |         |            |            |           |      |   | chr2:235147238:235176281:Panc1;chr2:235149098:235171441:HMEC;chr2:235149154:235169603:u87;chr2:235149154:235171269:NHEK;chr2:235149185:235167891:Astrocytes;chr2:235149305:235168785:Osteoblasts;chr2:235149781:235169008:VACO9m;chr2:235152068:235210364:DND41;chr2:235175304:235203223:Jurkat;chr2:235180344:235222848:CD56;chr2:235180686:235222778:CD8primiary;chr2:235181359:235203307:CD4p CD25-II17p PMAstim |
| SELNC2  |        |    | FTMT2     |         |            |            |           |      |   | Th17;chr2:235187186:235203787:CD4 Naive                                                                                                                                                                                                                                                                                                                                                                             |
| A100009 |        |    | 0800013   | noncodi | CATG000000 | CATG000000 |           |      |   | Primary 8pool;chr2:235196775:235218846:CD4p CD25- CD45ROp                                                                                                                                                                                                                                                                                                                                                           |
| 314     | 3.1419 | up | noncoding | 964     | ng         | 47093      | 47093.1   | 2494 | + | Memory;chr2:235196776:235219293:CD4p CD25-II17- PMAstim                                                                                                                                                                                                                                                                                                                                                             |
|         |        |    |           |         |            |            |           |      |   | Th;chr2:235196855:235233139:CD4p CD25-CD45RAp Naive;chr2:235197112:235218282:CD4p CD225int CD127p                                                                                                                                                                                                                                                                                                                   |
|         |        |    |           |         |            |            |           |      |   | Tmem;chr2:235197115:235203529:CD4 Memory                                                                                                                                                                                                                                                                                                                                                                            |
|         |        |    |           |         |            |            |           |      |   | Primary                                                                                                                                                                                                                                                                                                                                                                                                             |
|         |        |    |           |         |            |            |           |      |   | 7pool;chr2:235197255:235218330:CD3;chr2:235197260:235203385:CD8 Memory                                                                                                                                                                                                                                                                                                                                              |
|         |        |    |           |         |            |            |           |      |   | chr2:235217pool;chr2:235197417:235203263:CD8 Naive                                                                                                                                                                                                                                                                                                                                                                  |
|         |        |    |           |         |            |            |           |      |   | 6857-8pool;chr2:235197495:235202520:CD8 Naive                                                                                                                                                                                                                                                                                                                                                                       |
|         |        |    |           |         |            |            |           |      |   | 235219350:7pool;chr2:235197813:235203468:CD4 Naive                                                                                                                                                                                                                                                                                                                                                                  |
|         |        |    |           |         |            |            |           |      |   | Primary 7pool                                                                                                                                                                                                                                                                                                                                                                                                       |
|         |        |    |           |         |            |            |           |      |   | chr3:183200971:183274916:MM1S;chr3:183212304:183275431:CD4p CD25- II17- PMAstim                                                                                                                                                                                                                                                                                                                                     |
|         |        |    |           |         |            |            |           |      |   | Th;chr3:183220239:183279244:Ly1;chr3:183220552:183274601:Toledo;chr3:183222014:183274594:DHL6;chr3:183224578:183274663:CD14;chr3:183229085                                                                                                                                                                                                                                                                          |
|         |        |    |           |         |            |            |           |      |   | :183274978:CD20;chr3:183229386:183311073:Tonsil;chr3:183249585:183272849:Fetal Intestine                                                                                                                                                                                                                                                                                                                            |
|         |        |    |           |         |            |            |           |      |   | 183270114:Large;chr3:183251026:183276917:CD34 Primary                                                                                                                                                                                                                                                                                                                                                               |
|         |        |    |           |         |            |            |           |      |   | RO01536                                                                                                                                                                                                                                                                                                                                                                                                             |
| ASHG19  |        |    |           |         |            |            |           |      |   | chr3:183266523-                                                                                                                                                                                                                                                                                                                                                                                                     |
| SELNC2  |        |    | ENST00    |         |            |            |           |      |   | 183270114:Large;chr3:183251026:183276917:CD34 Primary                                                                                                                                                                                                                                                                                                                                                               |
| A100012 |        |    | 0004916   | noncodi | ENSG000002 |            |           |      |   | RO01536                                                                                                                                                                                                                                                                                                                                                                                                             |
| 186     | 3.1388 | up | noncoding | 76      | ng         | 42522      | KLHL6-AS1 | 503  | + |                                                                                                                                                                                                                                                                                                                                                                                                                     |



|         |       |    |           |         |         |            |           |      |                                                         |
|---------|-------|----|-----------|---------|---------|------------|-----------|------|---------------------------------------------------------|
| ASHG19  |       |    |           |         |         |            |           |      | chr1:95063039:95125029:VACO                             |
| SELNC2  |       |    |           | ENST00  |         |            |           |      | 503;chr1:95067475:95121313:HCC1954;chr1:95082           |
| A100270 |       |    |           | 0004529 | noncodi | ENSG000002 |           |      | chr1:95123 138:95090228:HMEC;chr1:95082362:95127570:HeL |
| 769     | 2.034 | up | noncoding | 22      | ng      | 24081      | LINC01057 | 1331 | 089- a;chr1:95086964:95115430:IMR90;chr1:95106865:9     |
|         |       |    |           |         |         |            |           |      | 95285837:- 5124196:VACO 9m                              |



|         |        |      |           |         |         |            |          |          |     |            |                                                  |
|---------|--------|------|-----------|---------|---------|------------|----------|----------|-----|------------|--------------------------------------------------|
| ASHG19  |        |      |           |         |         |            |          |          |     |            | chr2:128331989:128410775:Toledo;chr2:128343496:  |
| SELNC2  |        |      |           | ENST00  |         |            |          |          |     |            | 128408767:DND41;chr2:128343598:128400582:Jurk    |
| A100010 |        |      |           | 0006096 | noncodi | ENSG000002 | RP11-    |          |     |            | at;chr2:128344401:128381109:RPMI-                |
| 088     | 2.6387 | down | noncoding | 97      | ng      | 72789      | 286H15.1 | Reliable | 852 | -          | 8402;chr2:128377348:128434025:Spleen;chr2:12838  |
|         |        |      |           |         |         |            |          |          |     |            | 7883:128439505:Left                              |
|         |        |      |           |         |         |            |          |          |     |            | Ventricle;chr2:128388413:128432789:Lung;chr2:128 |
|         |        |      |           |         |         |            |          |          |     |            | 388560:128432873:Right                           |
|         |        |      |           |         |         |            |          |          |     |            | Atrium;chr2:128389263:128442440:Stomach          |
|         |        |      |           |         |         |            |          |          |     |            | Smooth                                           |
|         |        |      |           |         |         |            |          |          |     | chr2:12838 | Muscle;chr2:128390495:128432769:Aorta;chr2:1283  |
|         |        |      |           |         |         |            |          |          |     | 3572-      | 94646:128433940:Brain Hippocampus                |
|         |        |      |           |         |         |            |          |          |     | 128384423: | Middle;chr2:128394715:128434019:Esophagus;chr2:  |
|         |        |      |           |         |         |            |          |          |     | -          | 128408605:128433645:Right Ventricle              |

|         |        |    |           |         |         |            |            |  |       |            |                               |
|---------|--------|----|-----------|---------|---------|------------|------------|--|-------|------------|-------------------------------|
| ASHG19  |        |    |           |         |         |            |            |  |       |            |                               |
| SELNC2  |        |    |           | MICT00  |         |            |            |  |       |            | chr20:4665                    |
| A100894 |        |    |           | 0002191 | noncodi | CATG000000 | CATG000000 |  |       |            | 3963-                         |
| 159     | 2.1788 | up | noncoding | 91      | ng      | 53438      | 53438.1    |  | 14983 | 46696591:+ | chr20:46691877:46711896:MCF-7 |

ASHG19  
 SELNC2  
 A100004  
 629 2.1792 up noncoding 25 ng 61211 RP1-80N2.3 Reliable 3325

chr6:6579291:6611287:CD14;chr6:6580795:6617577  
 :Thymus;chr6:6583756:6594187:GM12878;chr6:658  
 4625:6612024:Ly4;chr6:6584637:6621563:CD20;chr  
 6:6586207:6612284:CD19  
 Primary;chr6:6618133:6786846:Adipose  
 Nuclei;chr6:6654590:6705900:H2171;chr6:6676758:  
 6729396:CD14;chr6:6676855:6735940:HeLa;chr6:66  
 77167:6726548:Sigmoid  
 Colon;chr6:6677214:6759788:Small  
 Intestine;chr6:6677223:6760384:Fetal  
 Muscle;chr6:6677228:6760155:Lung;chr6:6677240:6  
 726479:Colon Crypt 3;chr6:6677241:6752818:Right  
 Atrium;chr6:6677249:6726130:Colon Crypt  
 1;chr6:6677359:6760016:Colon Crypt  
 2;chr6:6677932:6725877:NHEK;chr6:6677946:67267  
 82:Duodenum Smooth  
 Muscle;chr6:6677976:6754403:Fetal  
 Intestine;chr6:6678003:6726489:Esophagus;chr6:667  
 8285:6760335:Gastric;chr6:6678777:6754397:Fetal  
 Intestine Large;chr6:6684521:6725182:CD34  
 fetal;chr6:6689425:6753586:HSMMtube;chr6:669667  
 4:6725727:DND41;chr6:6698514:6725690:RPMI-  
 8402;chr6:6698606:6713749:Jurkat;chr6:6700517:67  
 25237:CD34 adult;chr6:6717838:6752019:Left  
 Ventricle;chr6:6723261:6767064:Psoas  
 chr6:66805 Muscle;chr6:6724345:6752510:Adrenal  
 42- Gland;chr6:6781001:6827603:HeLa;chr6:6790127:68  
 6683866:- 27876:Esophagus;chr6:6802457:6822261:HMEC







|         |        |    |           |         |            |       |        |      |            |                                                                                                                                                                                                                                                                                                                                                                                                                                                                                                             |                                        |
|---------|--------|----|-----------|---------|------------|-------|--------|------|------------|-------------------------------------------------------------------------------------------------------------------------------------------------------------------------------------------------------------------------------------------------------------------------------------------------------------------------------------------------------------------------------------------------------------------------------------------------------------------------------------------------------------|----------------------------------------|
| ASHG19  |        |    |           |         |            |       |        |      |            | chr12:54357641:54378730:Panc1;chr12:54365295:54381230:HSMMtube;chr12:54365669:54400290:Fetal Muscle;chr12:54365772:54383178:HeLa;chr12:54372269:54401036:Skeletal Muscle;chr12:54374456:54401235:Psoas Muscle;chr12:54378772:54424544:Panc1;chr12:54381997:54402772:NHDF-Ad;chr12:54383968:54409342:Adipose Nuclei;chr12:54402812:54428773:NHDF-Ad;chr12:54406197:54422033:Skeletal Muscle;chr12:54406332:54427917:Fetal Muscle;chr12:54406517:54423230:Psoas Muscle;chr12:54409713:54420978:NHEK;chr12:544 |                                        |
| SELNC2  |        |    | ENST00    |         |            |       |        |      |            | chr12:5435                                                                                                                                                                                                                                                                                                                                                                                                                                                                                                  | 10440:54427864:Adipose                 |
| A100001 |        |    | 0004245   | noncodi | ENSG000002 |       |        |      |            | 6092-                                                                                                                                                                                                                                                                                                                                                                                                                                                                                                       | Nuclei;chr12:54410599:54425812:Adrenal |
| 968     | 2.7898 | up | noncoding | 18      | ng         | 28630 | HOTAIR | 2421 | 54368740:- | Gland;chr12:54411076:54414317:Ovary                                                                                                                                                                                                                                                                                                                                                                                                                                                                         |                                        |



ASHG19  
 SELNC2  
 A100012  
 378 2.7844 up noncoding 24 ng 72341 RP1-151F17.2 Reliable 2538

ENST00  
 0006069 noncodi ENSG000002

chr6:16764 16764786:CD4p CD225int CD127p  
 577- Tmem;chr6:16759123:16764973:CD4 Memory  
 16767114:+ Primary 8pool

chr6:16651403:16714339:CD4p CD25- Il17-  
 PMAstim Th;chr6:16651709:16714493:CD4p CD25-  
 Il17p PMAstim  
 Th17;chr6:16659415:16770204:CD14;chr6:16668829  
 :16770985:NHEK;chr6:16668888:16771136:HMEC;  
 chr6:16670001:16771263:Spleen;chr6:16672019:167  
 71851:Pancl;chr6:16674385:16784542:HSMtube;c  
 hr6:16674509:16771483:Osteoblasts;chr6:16674745:  
 16771289:HSM;chr6:16674759:16771241:Skeletal  
 Muscle  
 Myoblast;chr6:16676542:16770991:u87;chr6:166974  
 31:16771599:Duodenum Smooth  
 Muscle;chr6:16698914:16771717:Stomach Smooth  
 Muscle;chr6:16699036:16764567:Brain Anterior  
 Caudate;chr6:16699517:16771184:Lung;chr6:167041  
 67:16771389:Astrocytes;chr6:16731181:16764249:C  
 D4p CD25- Il17p PMAstim  
 Th17;chr6:16736801:16782756:Left  
 Ventricle;chr6:16739584:16763862:Esophagus;chr6:1  
 6742449:16782423:Gastric;chr6:16752143:16771175  
 :VACO 503;chr6:16758092:16765048:CD8 Memory  
 7pool;chr6:16758240:16764321:CD8 Naive  
 7pool;chr6:16758304:16770625:CD4p CD25-  
 CD45ROp Memory;chr6:16758455:16764963:CD4  
 Memory Primary  
 7pool;chr6:16758493:16770384:CD4 Naive Primary  
 8pool;chr6:16758850:16770460:CD3;chr6:16758956:



ASHG19  
 SELNC2  
 A100002  
 339 4.8772 down noncoding 99 ng 63975 CTB-58E17.9 Reliable 563

ENST00  
 0005794 noncodi ENSG000002

chr17:36841485:368604155: Spleen; chr17:3684954:36863638: Left  
 Ventricle; chr17:36849416:36867442: Fetal  
 Muscle; chr17:36849427:36868217: Lung; chr17:36849443:36863581: Small  
 Intestine; chr17:36849446:36869721: Right  
 Atrium; chr17:36849486:36864348: Sigmoid  
 Colon; chr17:36849658:36862895: Right  
 Ventricle; chr17:36849707:36864129: Gastric; chr17:36852020:36863435: MM1S; chr17:36852687:36863936: Tonsil; chr17:36854835:36891315: CD4p CD25- Il17p PMAstim  
 Th17; chr17:36854933:36891548: CD4p CD25- Il17- PMAstim  
 Th; chr17:36856374:36863732: Ly3; chr17:36856433:36863910: CD56; chr17:36856888:36888783: CD8 primary; chr17:36857029:36864323: Pancreatic islets; chr17:36857157:36863577: Esophagus; chr17:36857165:36863536: Adrenal Gland; chr17:36857173:36861522: K562; chr17:36857186:36861774: HeLa; chr17:36857283:36862851: Pancreas; chr17:36857283:36862900: VACO 9m; chr17:36857336:36862962: Thymus; chr17:36857431:36876540: VACO 503; chr17:36880595:36907474: Gastric; chr17:36880935:36900163: Colon Crypt 2; chr17:36881475:36907782: Small Intestine; chr17:36881476:36907973: Colon Crypt 1; chr17:36883977:36907951: Lung; chr17:36886485:36876525:- 6906657: Pancreas; chr17:36886615:36890751: LNCaP





|         |       |      |           |    |    |       |           |  |      |           |                                                                                                                                                                                                                                                                                                                                                        |
|---------|-------|------|-----------|----|----|-------|-----------|--|------|-----------|--------------------------------------------------------------------------------------------------------------------------------------------------------------------------------------------------------------------------------------------------------------------------------------------------------------------------------------------------------|
| ASHG19  |       |      |           |    |    |       |           |  |      |           | chr17:8112579:8127854:HepG2;chr17:8121063:8131239:CD4 Memory Primary                                                                                                                                                                                                                                                                                   |
| SELNC2  |       |      |           |    |    |       |           |  |      |           | 7pool;chr17:8121656:8131346:Small                                                                                                                                                                                                                                                                                                                      |
| A100007 |       |      |           |    |    |       |           |  |      |           | Intestine;chr17:8122481:8127887:HeLa;chr17:8123431:8130749:Gastric;chr17:8123504:8127842:Fetal                                                                                                                                                                                                                                                         |
| 995     | 2.412 | down | noncoding | 07 | ng | 78977 | LINC00324 |  | 2082 | 8127361:- | Intestine;chr17:8123530:8131218:Brain<br>Hippocampus Middle<br>150;chr17:8123611:8131045:Fetal Intestine<br>Large;chr17:8123637:8131108:Fetal<br>Muscle;chr17:8123803:8131186:Spleen;chr17:8123967:8130884:Lung;chr17:8123971:8131178:Sigmoid<br>Colon;chr17:8123987:8127792:Esophagus;chr17:8124127:8142235:LNCaP;chr17:8124203:8127610:Colon Crypt 2 |



|         |        |      |           |         |         |            |            |      |     |   |            |                                                   |
|---------|--------|------|-----------|---------|---------|------------|------------|------|-----|---|------------|---------------------------------------------------|
| ASHG19  |        |      |           |         |         |            |            |      |     |   | chr2:21884 | 222:218579946:Esophagus;chr2:218509969:2185801    |
| SELNC2  |        |      |           | ENST00  |         |            |            |      |     |   | 3430-      | 20:u87;chr2:218548183:218895526:Adipose           |
| A100008 |        |      |           | 0004509 | noncodi | ENSG000002 |            |      |     |   | 218857338: | Nuclei;chr2:218549230:218619480:HSMMtube;chr2:    |
| 019     | 2.9141 | down | noncoding | 96      | ng      | 23923      | AC010136.2 | Gold | 568 | + |            | 218552362:218620962:Aorta;chr2:218653278:21888    |
|         |        |      |           |         |         |            |            |      |     |   |            | 7396:Aorta;chr2:218653542:218735949:HSMMtube;     |
|         |        |      |           |         |         |            |            |      |     |   |            | chr2:218653746:218853837:Stomach Smooth           |
|         |        |      |           |         |         |            |            |      |     |   |            | Muscle;chr2:218653989:218894379:Left              |
|         |        |      |           |         |         |            |            |      |     |   |            | Ventricle;chr2:218653998:218760935:Lung;chr2:218  |
|         |        |      |           |         |         |            |            |      |     |   |            | 654003:218875571:Esophagus;chr2:218654007:2187    |
|         |        |      |           |         |         |            |            |      |     |   |            | 25195:Right                                       |
|         |        |      |           |         |         |            |            |      |     |   |            | Atrium;chr2:218654030:218736842:Psoas             |
|         |        |      |           |         |         |            |            |      |     |   |            | Muscle;chr2:218654085:218820251:Spleen;chr2:218   |
|         |        |      |           |         |         |            |            |      |     |   |            | 654112:218736192:Skeletal                         |
|         |        |      |           |         |         |            |            |      |     |   |            | Muscle;chr2:218654125:218872122:Adrenal           |
|         |        |      |           |         |         |            |            |      |     |   |            | Gland;chr2:218660828:218882796:Ovary;chr2:21866   |
|         |        |      |           |         |         |            |            |      |     |   |            | 5357:218753185:Fetal                              |
|         |        |      |           |         |         |            |            |      |     |   |            | Muscle;chr2:218668946:218724501:HSMM;chr2:218     |
|         |        |      |           |         |         |            |            |      |     |   |            | 669821:218724987:Duodenum Smooth                  |
|         |        |      |           |         |         |            |            |      |     |   |            | Muscle;chr2:218679869:218854013:Brain             |
|         |        |      |           |         |         |            |            |      |     |   |            | Hippocampus                                       |
|         |        |      |           |         |         |            |            |      |     |   |            | Middle;chr2:218686430:218809140:Osteoblasts;chr2: |
|         |        |      |           |         |         |            |            |      |     |   |            | 218692062:218724052:Right                         |
|         |        |      |           |         |         |            |            |      |     |   |            | Ventricle;chr2:218743526:218876017:Pancreatic     |
|         |        |      |           |         |         |            |            |      |     |   |            | islets;chr2:218751029:218889973:Right             |
|         |        |      |           |         |         |            |            |      |     |   |            | Atrium;chr2:218752708:218831801:Psoas             |
|         |        |      |           |         |         |            |            |      |     |   |            | Muscle;chr2:218754400:218830001:Right             |
|         |        |      |           |         |         |            |            |      |     |   |            | Ventricle;chr2:218754638:218814123:Brain          |
|         |        |      |           |         |         |            |            |      |     |   |            | Cingulate                                         |
|         |        |      |           |         |         |            |            |      |     |   |            | Gyrus;chr2:218761678:218869783:Gastric;chr2:2187  |

|         |        |      |           |         |         |            |            |      |            |                                                                                              |
|---------|--------|------|-----------|---------|---------|------------|------------|------|------------|----------------------------------------------------------------------------------------------|
| ASHG19  |        |      |           |         |         |            |            |      |            | chr7:77010620:77111780:CD14;chr7:77016591:77056363:HepG2;chr7:77036386:77095861:u87;chr7:770 |
| SELNC2  |        |      |           | FTMT2   |         |            |            |      | chr7:77055 | 54037:77097807:HSMMtube;chr7:77054421:770951                                                 |
| A100006 |        |      |           | 2600003 | noncodi | CATG000000 | CATG000000 |      | 446-       | 71:HSMM;chr7:77054423:77094996:Skeletal Muscle                                               |
| 330     | 2.2299 | down | noncoding | 935     | ng      | 96154      | 96154.1    | 2798 | 77058243:- | Myoblast                                                                                     |
| ASHG19  |        |      |           |         |         |            |            |      |            | chr6:11584761:11657637:HSMMtube;chr6:11585953                                                |
| SELNC2  |        |      |           | FTMT2   |         |            |            |      | chr6:11650 | Myoblast;chr6:11604834:11619187:HUVEC;chr6:11                                                |
| A100004 |        |      |           | 2400000 | noncodi | CATG000000 | CATG000000 |      | 824-       | 647355:11656665:Skeletal Muscle                                                              |
| 791     | 2.3453 | down | noncoding | 953     | ng      | 82734      | 82734.1    | 1360 | 11652183:+ | Myoblast;chr6:11648278:11657232:HUVEC                                                        |
|         |        |      |           |         |         |            |            |      |            | chr8:129147244:129191727:MCF-                                                                |
|         |        |      |           |         |         |            |            |      |            | 7;chr8:129153748:129219173:HCC1954;chr8:12915                                                |
|         |        |      |           |         |         |            |            |      |            | 8962:129219148:Ly3;chr8:129159080:129218964:H                                                |
|         |        |      |           |         |         |            |            |      |            | BL1;chr8:129163751:129203247:HSMMtube;chr8:1                                                 |
|         |        |      |           |         |         |            |            |      |            | 29165089:129210112:u87;chr8:129179300:12919853                                               |
|         |        |      |           |         |         |            |            |      |            | 9:HUVEC;chr8:129179447:129215108:Osteoblasts;c                                               |
|         |        |      |           |         |         |            |            |      |            | hr8:129179643:129210014:Skeletal Muscle                                                      |
|         |        |      |           |         |         |            |            |      |            | Myoblast;chr8:129179643:129210119:HSMM;chr8:1                                                |
| ASHG19  |        |      |           |         |         |            |            |      | chr8:12919 | 29179715:129198151:NHEK;chr8:129179902:12919                                                 |
| SELNC2  |        |      |           | MICT00  |         |            |            |      | 2183-      | 8300:NHDF-                                                                                   |
| A100941 |        |      |           | 0003514 | noncodi | CATG000001 | CATG000001 |      | 129206123: | Ad;chr8:129179996:129198145:HMEC;chr8:129180                                                 |
| 269     | 2.8803 | up   | noncoding | 36      | ng      | 04069      | 04069.1    | 4239 | -          | 089:129198014:Astrocytes                                                                     |

|        |        |      |           |    |    |       |          |     |  |                                                                                                                                                                                                                                                                                                                                                                                                                                                                                                                                                                                                                                                                                                                                                                                                                                                                                                                                                                                                                                                                                                              |
|--------|--------|------|-----------|----|----|-------|----------|-----|--|--------------------------------------------------------------------------------------------------------------------------------------------------------------------------------------------------------------------------------------------------------------------------------------------------------------------------------------------------------------------------------------------------------------------------------------------------------------------------------------------------------------------------------------------------------------------------------------------------------------------------------------------------------------------------------------------------------------------------------------------------------------------------------------------------------------------------------------------------------------------------------------------------------------------------------------------------------------------------------------------------------------------------------------------------------------------------------------------------------------|
| ASHG19 |        |      |           |    |    |       |          |     |  | chr17:46614519:46655817:K562;chr17:46610505:46643764:Stomach Smooth Muscle;chr17:46616495:46628430:Duodenum Smooth Muscle;chr17:46616604:46628510:Panc1;chr17:46616612:46638413:IMR90;chr17:46617686:46638459:Fetal Intestine;chr17:46617796:46628498:Astrocytes;chr17:46617893:46635291:CD4 Memory Primary Tpool;chr17:46617957:46626930:CD8 Memory Tpool;chr17:46617962:46634923:CD34 Primary RO01536;chr17:46617995:46638448:Fetal Intestine Large;chr17:46618028:46626453:Fetal Muscle;chr17:46618257:46633041:NHLF;chr17:46618362:46647118:NCI-H69;chr17:46618553:46642514:GLC16;chr17:46618902:46626390:CD34 adult;chr17:46628526:46699689:Panc1;chr17:46631233:46657163:Sigmoid Colon;chr17:46638491:46676520:IMR90;chr17:46638493:46660923:Spleen;chr17:46639530:46679459:Fetal Intestine Large;chr17:46641810:46667072:Adipose Nuclei;chr17:46641815:46655410:Duodenum Smooth Muscle;chr17:46643752:46661293:Esophagus;chr17:46643837:46661670:Stomach Smooth Muscle;chr17:46646373:46671210:NHLF;chr17:46650913-2473:46663178:K562;chr17:46652672:46657163:VA CO 400;chr17:46655441:46671367:NHDF- |
| 248    | 2.1892 | down | noncoding | 72 | ng | 30148 | HOXB-AS1 | 680 |  |                                                                                                                                                                                                                                                                                                                                                                                                                                                                                                                                                                                                                                                                                                                                                                                                                                                                                                                                                                                                                                                                                                              |

|         |        |    |           |         |            |            |         |      |
|---------|--------|----|-----------|---------|------------|------------|---------|------|
| ASHG19  |        |    |           |         |            |            |         |      |
| SELNC2  |        |    | MICT00    |         |            |            |         |      |
| A100005 |        |    | 0001985   | noncodi | CATG000000 | CATG000000 |         |      |
| 499     | 2.1384 | up | noncoding | 25      | ng         | 49907      | 49907.1 | 1540 |

chr2:127802089:127916166:Brain Hippocampus Middle;chr2:127802281:127866253:Psoas Muscle;chr2:127802319:127915961:Brain Cingulate Gyrus;chr2:127802471:127866282:Skeletal Muscle;chr2:127802710:127915790:Brain Hippocampus Middle 150;chr2:127802898:127935319:Fetal Muscle;chr2:127806748:127912517:Brain Inferior Temporal Lobe;chr2:127806783:127915950:Brain Anterior Caudate;chr2:127807526:127873345:VACO 400;chr2:127807911:127911516:Brain Angular Gyrus;chr2:127811208:127860003:Colon Crypt 2;chr2:127821031:127865759:HSMMtube;chr2:127821381:127879490:Adipose Nuclei;chr2:127821585:127843293:CD4p CD25- II17p PMAstim Th17;chr2:127821634:127865515:Adrenal Gland;chr2:127821815:127865860:Sigmoid Colon;chr2:127821868:127886512:Gastric;chr2:127821870:127845265:CD8 primary;chr2:127822206:127865564:LNCaP;chr2:127824973:127845272:Brain Mid Frontal 9385- Lobe;chr2:127837127:127865862:Spleen;chr2:12785127904755: 8009:127875840:Brain Mid Frontal Lobe;chr2:127900679:127934599:Psoas Muscle

ASHG19  
 SELNC2  
 A100001  
 579 2.1183 up noncoding 51 ng 72982 1180E21.4 Reliable 118

ENST00  
 0006079 noncodi ENSG000002 RP5-

chr1:111707042:111752758:CD20;chr1:111720465:1  
 11773369:CD4p CD25- CD45RAp  
 Naive;chr1:111720877:111748580:Adipose  
 Nuclei;chr1:111721356:111773351:CD4p CD25-  
 Il17- PMAstim Th;chr1:111721546:111771793:CD8  
 primary;chr1:111722467:111770686:CD56;chr1:111  
 722584:111771572:CD3;chr1:111724894:111769353  
 :CD4 Memory Primary  
 7pool;chr1:111725046:111766110:CD14;chr1:11172  
 5074:111771067:CD4p CD25- CD45ROp  
 Memory;chr1:111727706:111778392:DND41;chr1:11  
 1730652:111771012:CD8 Naive  
 8pool;chr1:111730953:111769306:CD4p CD25-  
 Il17p PMAstim  
 Th17;chr1:111731924:111786958:Spleen;chr1:11173  
 2684:111775273:Tonsil;chr1:111732689:111766358:  
 Sigmoid Colon;chr1:111732755:111766318:Small  
 Intestine;chr1:111734292:111748221:Gastric;chr1:11  
 1734374:111769514:GM12878;chr1:111734461:111  
 748269:Esophagus;chr1:111734723:111748126:Colo  
 n Crypt 2;chr1:111734737:111768995:CD19  
 Primary;chr1:111734752:111768907:CD4p  
 CD225int CD127p  
 Tmem;chr1:111734884:111769467:CD8 Memory  
 7pool;chr1:111734917:111772142:Fetal  
 Thymus;chr1:111734952:111769864:CD4 Naive  
 chr1:11172 3996- 111724113: Primary 8pool;chr1:111735057:111770041:CD8  
 Naive 7pool;chr1:111735190:111768994:CD4  
 Memory Primary  
 - 8pool;chr1:111735195:111775083:Ly1;chr1:1117352





|         |        |    |           |    |    |       |         |      |           |                                                    |
|---------|--------|----|-----------|----|----|-------|---------|------|-----------|----------------------------------------------------|
| ASHG19  |        |    |           |    |    |       |         |      |           | chr4:6747543:6755479:Sigmoid                       |
| SELNC2  |        |    |           |    |    |       |         |      |           | Colon;chr4:6747688:6775877:Colon Crypt             |
| A100159 |        |    |           |    |    |       |         |      |           | 1;chr4:6747805:6754014:LNCaP;chr4:6747980:6755     |
| 211     | 9.1881 | up | noncoding | 57 | ng | 67637 | 67637.1 | 3277 | 6776239:+ | 423:Colon Crypt                                    |
|         |        |    |           |    |    |       |         |      |           | 2;chr4:6748436:6775971:Esophagus;chr4:6769138:6    |
|         |        |    |           |    |    |       |         |      |           | 790306:Spleen;chr4:6769697:6896339:CD14;chr4:68    |
|         |        |    |           |    |    |       |         |      |           | 93090:6913819:HepG2;chr4:6893265:6972483:Sigm      |
|         |        |    |           |    |    |       |         |      |           | oid Colon;chr4:6893286:6950427:Small               |
|         |        |    |           |    |    |       |         |      |           | Intestine;chr4:6904027:6966281:Gastric;chr4:690995 |
|         |        |    |           |    |    |       |         |      |           | 1:6995625:Fetal Intestine                          |
|         |        |    |           |    |    |       |         |      |           | Large;chr4:6909995:6959132:Lung;chr4:6910012:69    |
|         |        |    |           |    |    |       |         |      |           | 66350:Adrenal                                      |
|         |        |    |           |    |    |       |         |      |           | Gland;chr4:6910151:6920583:K562;chr4:6911789:69    |
|         |        |    |           |    |    |       |         |      |           | 50465:Duodenum Smooth                              |
|         |        |    |           |    |    |       |         |      |           | Muscle;chr4:6916638:6995431:Fetal                  |
|         |        |    |           |    |    |       |         |      |           | Intestine;chr4:6916719:6972539:Colon Crypt         |
|         |        |    |           |    |    |       |         |      |           | 1;chr4:6916746:6972431:Colon Crypt                 |
|         |        |    |           |    |    |       |         |      |           | 2;chr4:6917822:6945824:Spleen;chr4:6918165:69458   |
|         |        |    |           |    |    |       |         |      |           | 33:Thymus;chr4:6985595:7004711:Esophagus;chr4:6    |
|         |        |    |           |    |    |       |         |      |           | 992335:7008299:HMEC                                |

|         |        |      |           |    |    |       |            |              |            |                                                |
|---------|--------|------|-----------|----|----|-------|------------|--------------|------------|------------------------------------------------|
| ASHG19  |        |      |           |    |    |       |            |              |            |                                                |
| SELNC2  |        |      |           |    |    |       |            |              |            | chr7:50181                                     |
| A100011 |        |      |           |    |    |       |            |              |            | 136-                                           |
| 176     | 2.7347 | down | noncoding | 77 | ng | 28005 | AC020743.2 | Reliable 767 | 50182419:- | chr7:50180182:50208003:Ly1;chr7:50180370:50209 |
|         |        |      |           |    |    |       |            |              |            | 842:Ly3;chr7:50180593:50207933:DHL6            |

|         |        |    |           |    |    |       |            |      |            |                                                |
|---------|--------|----|-----------|----|----|-------|------------|------|------------|------------------------------------------------|
| ASHG19  |        |    |           |    |    |       |            |      |            |                                                |
| SELNC2  |        |    |           |    |    |       |            |      |            | chr21:3448                                     |
| A100002 |        |    |           |    |    |       |            |      |            | 4005-                                          |
| 759     | 2.6327 | up | noncoding | 51 | ng | 26527 | AP000289.6 | 1361 | 34496009:- | chr21:34481477:34546723:H2171;chr21:34482797:3 |
|         |        |    |           |    |    |       |            |      |            | 4500507:Brain Hippocampus Middle 150           |

|         |        |      |           |         |         |            |          |               |   |                                                           |
|---------|--------|------|-----------|---------|---------|------------|----------|---------------|---|-----------------------------------------------------------|
| ASHG19  |        |      |           |         |         |            |          |               |   | chr2:23192                                                |
| SELNC2  |        |      |           |         |         |            |          |               |   | 1578-                                                     |
| A100082 |        |      |           | NR_034  | noncodi | ENSG000001 |          |               |   | 232037540: chr2:231967334:231990673:Duodenum Smooth       |
| 995     | 3.6485 | down | noncoding | 059     | ng      | 73692      | PSMD1    | 3159          | + | Muscle                                                    |
| ASHG19  |        |      |           |         |         |            |          |               |   | chr2:23192 chr2:232023929:232057846:NHDF-                 |
| SELNC2  |        |      |           |         |         |            |          |               |   | 1578- Ad;chr2:232025570:232057244:Adrenal                 |
| A100082 |        |      |           | NR_034  | noncodi | ENSG000001 |          |               |   | 232037540: Gland;chr2:232038399:232111292:DHL6;chr2:23204 |
| 995     | 3.6485 | down | noncoding | 059     | ng      | 73692      | PSMD1    | 3159          | + | 5467:232093068:Aorta                                      |
| ASHG19  |        |      |           |         |         |            |          |               |   | chr1:17869                                                |
| SELNC2  |        |      |           | ENST00  |         |            |          |               |   | 3441-                                                     |
| A100014 |        |      |           | 0006085 | noncodi | ENSG000002 | RP11-    |               |   | 178695420:                                                |
| 661     | 2.5403 | up   | noncoding | 17      | ng      | 73062      | 428K3.1  | Reliable 1980 | - | chr1:178685662:178773611:CD20                             |
| ASHG19  |        |      |           |         |         |            |          |               |   | chr15:6957 chr15:69583026:69621894:Colon Crypt            |
| SELNC2  |        |      |           | ENST00  |         |            |          |               |   | 6501- 1;chr15:69593457:69621946:Sigmoid                   |
| A101026 |        |      |           | 0005584 | noncodi | ENSG000002 | RP11-    |               |   | 69587661:+ Colon;chr15:69597309:69621782:Colon Crypt 2    |
| 405     | 5.3655 | down | noncoding | 54      | ng      | 59504      | 352D13.5 | 421           |   |                                                           |

|         |        |    |           |         |            |       |            |               |   |                                                                                                                                                                                                                                                                                                                                                                                                                                                                                                                                                                                                                                                                                                                                                                                                                                                                                                                                                                               |
|---------|--------|----|-----------|---------|------------|-------|------------|---------------|---|-------------------------------------------------------------------------------------------------------------------------------------------------------------------------------------------------------------------------------------------------------------------------------------------------------------------------------------------------------------------------------------------------------------------------------------------------------------------------------------------------------------------------------------------------------------------------------------------------------------------------------------------------------------------------------------------------------------------------------------------------------------------------------------------------------------------------------------------------------------------------------------------------------------------------------------------------------------------------------|
| ASHG19  |        |    |           |         |            |       |            |               |   | chr5:133837467:133864452:HeLa;chr5:133837686:133864566:HCT-116;chr5:133837691:133864074:VACO400;chr5:133838361:133905185:CD4p CD25- II17-PMAstim Th;chr5:133838388:133866725:Fetal Intestine;chr5:133838537:133866603:Fetal Intestine Large;chr5:133838541:133869042:Gastric;chr5:133838572:133916041:Lung;chr5:133838583:133931632:Right Atrium;chr5:133838586:133912623:Small Intestine;chr5:133838591:133931800:Left Ventricle;chr5:133838611:133864360:Sigmoid Colon;chr5:133838659:133907026:Spleen;chr5:133838666:133863953:Colon Crypt 1;chr5:133838667:133863766:Colon Crypt 2;chr5:133838668:133917568:Adrenal Gland;chr5:133838670:133867130:Esophagus;chr5:133838672:133892328:Tonsil;chr5:133838676:133863986:VACO 9m;chr5:133838696:133907397:Brain Hippocampus Middle;chr5:133838963:133866754:Pancreas;chr5:133840955:133864689:HepG2;chr5:133841422:133864268:VACO503;chr5:133846492:133877168:H1;chr5:133856931:133920988:CD20;chr5:133858546:133892597:CD4p |
| SELNC2  |        |    | ENST00    |         |            |       |            |               |   | chr5:133842243-                                                                                                                                                                                                                                                                                                                                                                                                                                                                                                                                                                                                                                                                                                                                                                                                                                                                                                                                                               |
| A100005 |        |    | 0005156   | noncodi | ENSG000002 |       |            |               |   | 133844920:                                                                                                                                                                                                                                                                                                                                                                                                                                                                                                                                                                                                                                                                                                                                                                                                                                                                                                                                                                    |
| 265     | 3.1104 | up | noncoding | 27      | ng         | 51169 | AC005355.2 | 1107          | + | 8968:133893355:CD4p CD25- CD45ROp Memory;chr5:133859042:133893012:CD8                                                                                                                                                                                                                                                                                                                                                                                                                                                                                                                                                                                                                                                                                                                                                                                                                                                                                                         |
| ASHG19  |        |    |           |         |            |       |            |               |   | chr8:145132905-                                                                                                                                                                                                                                                                                                                                                                                                                                                                                                                                                                                                                                                                                                                                                                                                                                                                                                                                                               |
| SELNC2  |        |    | ENST00    |         |            |       |            |               |   | 145134168:                                                                                                                                                                                                                                                                                                                                                                                                                                                                                                                                                                                                                                                                                                                                                                                                                                                                                                                                                                    |
| A100009 |        |    | 0005244   | noncodi | ENSG000002 | CTD-  |            |               |   | chr8:145100141:145136169:HCT-116;chr8:145103882:145135645:Colon Crypt 3                                                                                                                                                                                                                                                                                                                                                                                                                                                                                                                                                                                                                                                                                                                                                                                                                                                                                                       |
| 910     | 3.0236 | up | noncoding | 99      | ng         | 55224 | 3065J16.9  | Reliable 1264 | - |                                                                                                                                                                                                                                                                                                                                                                                                                                                                                                                                                                                                                                                                                                                                                                                                                                                                                                                                                                               |

|         |        |    |           |         |         |            |              |          |      |                                                                                                    |
|---------|--------|----|-----------|---------|---------|------------|--------------|----------|------|----------------------------------------------------------------------------------------------------|
| ASHG19  |        |    |           |         |         |            |              |          |      | chr3:184274276:184303185:Gastric;chr3:184279295:184303121:Esophagus;chr3:184280246:184445487:Fetal |
| SELNC2  |        |    |           | ENST00  |         |            |              |          |      | chr3:18445                                                                                         |
| A100009 |        |    |           | 0006092 | noncodi | ENSG000002 | RP11-        |          |      | Muscle;chr3:184281212:184287586:LNCaP;chr3:184                                                     |
| 257     | 2.0512 | up | noncoding | 11      | ng      | 73403      | 329B9.3      | Reliable | 526  | 9725-281285:184322501:Ovary;chr3:184444168:18448535                                                |
|         |        |    |           |         |         |            |              |          |      | 184460250:9:HMEC;chr3:184454658:184491921:Esophagus;chr3:184455452:184492084:Gastric               |
| ASHG19  |        |    |           |         |         |            |              |          |      | chr4:186421060:186464953:Skeletal                                                                  |
| SELNC2  |        |    |           | ENST00  |         |            |              |          |      | Muscle;chr4:186421360:186499390:Stomach                                                            |
| A100009 |        |    |           | 0004118 | noncodi | ENSG000002 |              |          |      | Smooth                                                                                             |
| 678     | 4.5334 | up | noncoding | 47      | ng      | 33110      | RP11-301L8.2 | Reliable | 1789 | Muscle;chr4:186433975:186523178:Aorta;chr4:1864                                                    |
|         |        |    |           |         |         |            |              |          |      | chr4:18650                                                                                         |
|         |        |    |           |         |         |            |              |          |      | 9063-79908:186520031:HSMMtube;chr4:186486507:1865                                                  |
|         |        |    |           |         |         |            |              |          |      | 186515157:Muscle;chr4:186486565:186515249:Skeletal                                                 |
|         |        |    |           |         |         |            |              |          |      | +Muscle;chr4:186487403:186511232:HSMM                                                              |
| ASHG19  |        |    |           |         |         |            |              |          |      | chr2:196332206:196461723:DND41;chr2:196335194                                                      |
| SELNC2  |        |    |           | ENST00  |         |            |              |          |      | chr2:19643                                                                                         |
| A100000 |        |    |           | 0004327 | noncodi | ENSG000002 |              |          |      | :196360792:Jurkat;chr2:196395093:196445631:CD4                                                     |
| 421     | 13.481 | up | noncoding | 11      | ng      | 34919      | AC064834.3   | Gold     | 555  | 4352-p CD25- II17- PMAstim                                                                         |
|         |        |    |           |         |         |            |              |          |      | 196437694:Th;chr2:196395930:196445779:Tonsil;chr2:1964227                                          |
|         |        |    |           |         |         |            |              |          |      | -37:196441571:Ly3                                                                                  |
| ASHG19  |        |    |           |         |         |            |              |          |      | chr1:22200                                                                                         |
| SELNC2  |        |    |           | ENST00  |         |            |              |          |      | chr1:221974668:222061847:u87;chr1:221975004:222                                                    |
| A100005 |        |    |           | 0004317 | noncodi | ENSG000002 | RP11-        |          |      | 1008-043453:HMEC;chr1:221989710:222020004:HSMM;                                                    |
| 773     | 2.051  | up | noncoding | 29      | ng      | 27925      | 191N8.2      |          | 423  | 222014008:chr1:221989823:222019970:Skeletal Muscle                                                 |
|         |        |    |           |         |         |            |              |          |      | -Myoblast;chr1:222058928:222066721:HMEC                                                            |

|         |        |      |           |         |         |            |          |      |   |            |                                                |
|---------|--------|------|-----------|---------|---------|------------|----------|------|---|------------|------------------------------------------------|
| ASHG19  |        |      |           |         |         |            |          |      |   |            | chr2:113905849:113962952:CD20;chr2:113913797:1 |
| SELNC2  |        |      |           | ENST00  |         |            |          |      |   |            | 13999675:Gastric;chr2:113913871:113962659:CD4p |
| A100219 |        |      |           | 0004362 | noncodi | ENSG000001 |          |      |   |            | CD25- Il17- PMAstim                            |
| 751     | 3.5648 | down | noncoding | 93      | ng      | 89223      | PAX8-AS1 | 2687 | + |            | Th;chr2:113914112:114004833:Pancreatic         |
|         |        |      |           |         |         |            |          |      |   |            | islets;chr2:113914421:113962467:CD4p CD25-     |
|         |        |      |           |         |         |            |          |      |   |            | Il17p PMAstim                                  |
|         |        |      |           |         |         |            |          |      |   |            | Th17;chr2:113914486:113939384:Colon Crypt      |
|         |        |      |           |         |         |            |          |      |   |            | 2;chr2:113914618:113956829:Thymus;chr2:1139241 |
|         |        |      |           |         |         |            |          |      |   | chr2:11399 | 70:113970102:CD14;chr2:113956031:113984103:V   |
|         |        |      |           |         |         |            |          |      |   | 3846-      | ACO                                            |
|         |        |      |           |         |         |            |          |      |   | 114024587: | 9m;chr2:113956137:114015415:u87;chr2:113974554 |
|         |        |      |           |         |         |            |          |      |   |            | :114000569:Adrenal Gland                       |

|         |        |      |           |         |         |            |          |     |  |                                                                                                          |
|---------|--------|------|-----------|---------|---------|------------|----------|-----|--|----------------------------------------------------------------------------------------------------------|
| ASHG19  |        |      |           |         |         |            |          |     |  | chr18:33009688:33061581:Osteoblasts;chr18:33035511:33072445:HUVEC;chr18:33035518:33107158:Stomach Smooth |
| SELNC2  |        |      |           | ENST00  |         |            |          |     |  | chr18:33026872-55682:33060819:NHEK;chr18:33057530:33094604:33047052:- Esophagus                          |
| A100662 |        |      |           | 0005867 | noncodi | ENSG000002 | RP11-    |     |  |                                                                                                          |
| 953     | 2.0908 | down | noncoding | 41      | ng      | 67583      | 322E11.5 | 571 |  |                                                                                                          |

ASHG19  
SELNC2  
A100006  
962

3.2291 up

noncoding

ENST00  
0006055

noncodi  
ng

ENSG000002  
71327

RP11-  
1109F11.3

Reliable 1495

chr12:8976  
1584-  
89763078:+

chr12:89716946:89750065:Spleen;chr12:89721256:8  
9749426:DND41;chr12:89727363:89749582:MM1S;  
chr12:89727454:89749549:Small  
Intestine;chr12:89733216:89785367:Left  
Ventricle;chr12:89733313:89749397:Fetal  
Muscle;chr12:89736686:89749897:Adipose  
Nuclei;chr12:89738766:89749678:Duodenum  
Smooth  
Muscle;chr12:89738992:89749161:HUVEC;chr12:89  
739228:89749898:HCT-  
116;chr12:89739271:89785574:Sigmoid  
Colon;chr12:89739274:89749889:Lung;chr12:89739  
317:89785560:Right  
Atrium;chr12:89739368:89796395:Fetal  
Intestine;chr12:89739391:89749746:Gastric;chr12:89  
739453:89796324:Fetal Intestine  
Large;chr12:89739456:89749194:VACO  
400;chr12:89739987:89749673:VACO  
503;chr12:89740269:89749345:NHLF;chr12:897403  
92:89779192:HMEC;chr12:89742737:89749385:Eso  
phagus;chr12:89744290:89749109:Pancreas;chr12:89  
744358:89785524:Colon Crypt  
3;chr12:89761862:89785888:HUVEC;chr12:8977242  
8:89786699:HepG2

|         |        |    |           |         |            |       |           |          |     |                                                                                                                                                                                                                                                                                                                                                                                                                                                                                                                                                                                                                                                                                                                                                                                                                                    |
|---------|--------|----|-----------|---------|------------|-------|-----------|----------|-----|------------------------------------------------------------------------------------------------------------------------------------------------------------------------------------------------------------------------------------------------------------------------------------------------------------------------------------------------------------------------------------------------------------------------------------------------------------------------------------------------------------------------------------------------------------------------------------------------------------------------------------------------------------------------------------------------------------------------------------------------------------------------------------------------------------------------------------|
| ASHG19  |        |    |           |         |            |       |           |          |     | chr12:89716946:89750065:Spleen;chr12:89721256:89749426:DND41;chr12:89727363:89749582:MM1S;chr12:89727454:89749549:Small Intestine;chr12:89733216:89785367:Left Ventricle;chr12:89733313:89749397:Fetal Muscle;chr12:89736686:89749897:Adipose Nuclei;chr12:89738766:89749678:Duodenum Smooth Muscle;chr12:89738992:89749161:HUVEC;chr12:89739228:89749898:HCT-116;chr12:89739271:89785574:Sigmoid Colon;chr12:89739274:89749889:Lung;chr12:89739317:89785560:Right Atrium;chr12:89739368:89796395:Fetal Intestine;chr12:89739391:89749746:Gastric;chr12:89739453:89796324:Fetal Intestine Large;chr12:89739456:89749194:VACO 400;chr12:89739987:89749673:VACO 503;chr12:89740269:89749345:NHLF;chr12:89740392:89779192:HMEC;chr12:89742737:89749385:Esophagus;chr12:89744290:89749109:Pancreas;chr12:89744358:89785524:Colon Crypt |
| SELNC2  |        |    | ENST00    |         |            |       |           |          |     | chr12:8976                                                                                                                                                                                                                                                                                                                                                                                                                                                                                                                                                                                                                                                                                                                                                                                                                         |
| A100004 |        |    | 0006050   | noncodi | ENSG000002 | RP11- |           |          |     | 5597-                                                                                                                                                                                                                                                                                                                                                                                                                                                                                                                                                                                                                                                                                                                                                                                                                              |
| 684     | 2.5217 | up | noncoding | 51      | ng         | 71259 | 1109F11.5 | Reliable | 540 | 89766136:+                                                                                                                                                                                                                                                                                                                                                                                                                                                                                                                                                                                                                                                                                                                                                                                                                         |
|         |        |    |           |         |            |       |           |          |     | 3;chr12:89761862:89785888:HUVEC;chr12:89772428:89786699:HepG2                                                                                                                                                                                                                                                                                                                                                                                                                                                                                                                                                                                                                                                                                                                                                                      |

|         |        |      |           |         |            |       |          |  |     |                                                               |
|---------|--------|------|-----------|---------|------------|-------|----------|--|-----|---------------------------------------------------------------|
| ASHG19  |        |      |           |         |            |       |          |  |     |                                                               |
| SELNC2  |        |      | ENST00    |         |            |       |          |  |     | chr11:6990                                                    |
| A100059 |        |      | 0005283   | noncodi | ENSG000002 | RP11- |          |  |     | 2336-                                                         |
| 370     | 5.4473 | down | noncoding | 16      | ng         | 48844 | 626H12.3 |  | 548 | 69910030:-                                                    |
|         |        |      |           |         |            |       |          |  |     | chr11:69894404:69928230:HCC1954;chr11:69918445:69983019:Aorta |



|         |        |    |           |         |            |       |          |            |                                                                                                                                                                                                                                                                                                                                                                                                                                                                                                                                                                                                                                                                                                                                                                                                                                                             |
|---------|--------|----|-----------|---------|------------|-------|----------|------------|-------------------------------------------------------------------------------------------------------------------------------------------------------------------------------------------------------------------------------------------------------------------------------------------------------------------------------------------------------------------------------------------------------------------------------------------------------------------------------------------------------------------------------------------------------------------------------------------------------------------------------------------------------------------------------------------------------------------------------------------------------------------------------------------------------------------------------------------------------------|
| ASHG19  |        |    |           |         |            |       |          |            | chr17:33537241:33598139:CD4p CD25- II17-<br>PMAstim Th;chr17:33538318:33614200:CD4p<br>CD25- CD45RAp<br>Naive;chr17:33562741:33580128:CD4 Memory<br>Primary<br>7pool;chr17:33563877:33573407:HMEC;chr17:3356<br>4068:33596942:CD8<br>primiary;chr17:33564704:33575384:CD4p CD25-<br>II17p PMAstim<br>Th17;chr17:33565216:33584939:HSMMtube;chr17:3<br>3565217:33581725:NHEK;chr17:33565325:3357256<br>1:CD8 Naive 7pool;chr17:33566773:33572593:CD4<br>Naive Primary                                                                                                                                                                                                                                                                                                                                                                                        |
| SELNC2  |        |    | ENST00    |         |            |       |          | chr17:3355 | 7pool;chr17:33567989:33572775:CD56;chr17:33568                                                                                                                                                                                                                                                                                                                                                                                                                                                                                                                                                                                                                                                                                                                                                                                                              |
| A100662 |        |    | 0005904   | noncodi | ENSG000002 | RP11- |          | 8469-      | 279:33572821:CD4 Naive Primary                                                                                                                                                                                                                                                                                                                                                                                                                                                                                                                                                                                                                                                                                                                                                                                                                              |
| 346     | 2.7998 | up | noncoding | 78      | ng         | 66947 | 799D4.4  | 2658       | 33569982:-<br>8pool;chr17:33568548:33585186:HeLa<br>chr1:1058966:1101877:Small<br>Intestine;chr1:1059412:1101686:Fetal Intestine<br>Large;chr1:1059633:1101903:Fetal<br>Intestine;chr1:1059682:1101913:VACO<br>400;chr1:1067578:1102178:LNCaP;chr1:1068186:11<br>01896:Esophagus;chr1:1069414:1073756:Colon<br>Crypt 3;chr1:1069443:1073717:Colon Crypt<br>2;chr1:1070790:1094387:CD19<br>Primary;chr1:1071352:1103985:VACO<br>9m;chr1:1077814:1082618:Colon Crypt<br>3;chr1:1077845:1081465:Colon Crypt<br>2;chr1:1079431:1101911:HCT-<br>116;chr1:1090819:1107666:Gastric;chr1:1092804:11<br>07737:Colon Crypt<br>3;chr1:1092807:1104591:Sigmoid<br>Colon;chr1:1092822:1104598:Colon Crypt<br>1;chr1:1092838:1103486:Colon Crypt<br>2;chr1:1092849:1101754:Pancreas;chr1:1096780:110<br>5079:Pancreatic islets;chr1:1097418:1104038:VACO<br>1079436:+ 503 |
| ASHG19  |        |    |           |         |            |       |          |            |                                                                                                                                                                                                                                                                                                                                                                                                                                                                                                                                                                                                                                                                                                                                                                                                                                                             |
| SELNC2  |        |    | ENST00    |         |            |       |          | chr1:10723 | 2;chr1:1092849:1101754:Pancreas;chr1:1096780:110                                                                                                                                                                                                                                                                                                                                                                                                                                                                                                                                                                                                                                                                                                                                                                                                            |
| A100001 |        |    | 0004167   | noncodi | ENSG000002 | RP11- |          | 97-        | 5079:Pancreatic islets;chr1:1097418:1104038:VACO                                                                                                                                                                                                                                                                                                                                                                                                                                                                                                                                                                                                                                                                                                                                                                                                            |
| 086     | 3.1813 | up | noncoding | 74      | ng         | 23823 | 465B22.5 | 1620       | 1079436:+ 503                                                                                                                                                                                                                                                                                                                                                                                                                                                                                                                                                                                                                                                                                                                                                                                                                                               |

|         |        |    |           |         |            |       |         |     |            |                            |
|---------|--------|----|-----------|---------|------------|-------|---------|-----|------------|----------------------------|
| ASHG19  |        |    |           |         |            |       |         |     |            |                            |
| SELNC2  |        |    | ENST00    |         |            |       |         |     | chr12:1481 |                            |
| A100015 |        |    | 0005011   | noncodi | ENSG000002 | RP11- |         |     | 8589-      |                            |
| 711     | 2.1593 | up | noncoding | 78      | ng         | 14772 | 174G6.1 | 657 | 14910897:+ | chr12:14863465:14868433:H1 |

|         |        |      |           |         |         |            |          |          |     |                                                   |
|---------|--------|------|-----------|---------|---------|------------|----------|----------|-----|---------------------------------------------------|
| ASHG19  |        |      |           |         |         |            |          |          |     | chr12:14894156:14929903:Fetal                     |
| SELNC2  |        |      |           | ENST00  |         |            |          |          |     | Intestine;chr12:14904251:14929729:Fetal Intestine |
| A100015 |        |      |           | 0005011 | noncodi | ENSG000002 | RP11-    |          |     | Large;chr12:14909266:14930627:Gastric;chr12:14920 |
| 711     | 2.1593 | up   | noncoding | 78      | ng      | 14772      | 174G6.1  |          | 657 | 323:14925540:CD4p CD25- Il17p PMAstim             |
|         |        |      |           |         |         |            |          |          |     | Th17;chr12:14920944:14929391:Tonsil;chr12:14920   |
|         |        |      |           |         |         |            |          |          |     | 983:14929308:CD4p CD25- Il17- PMAstim             |
|         |        |      |           |         |         |            |          |          |     | Th;chr12:14921125:14929327:CD4p CD25-             |
|         |        |      |           |         |         |            |          |          |     | CD45RAp Naive;chr12:14921171:14925487:CD4         |
|         |        |      |           |         |         |            |          |          |     | Memory Primary                                    |
|         |        |      |           |         |         |            |          |          |     | 7pool;chr12:14921199:14929173:CD4p CD25-          |
|         |        |      |           |         |         |            |          |          |     | CD45ROp Memory;chr12:14921305:14925568:CD8        |
|         |        |      |           |         |         |            |          |          |     | Naive 8pool;chr12:14921398:14925615:CD4 Naive     |
|         |        |      |           |         |         |            |          |          |     | Primary 8pool;chr12:14921454:14925458:CD4p        |
|         |        |      |           |         |         |            |          |          |     | CD225int CD127p                                   |
|         |        |      |           |         |         |            |          |          |     | Tmem;chr12:14921547:14925520:CD56;chr12:14921     |
|         |        |      |           |         |         |            |          |          |     | 553:14929535:Pancreatic                           |
|         |        |      |           |         |         |            |          |          |     | islets;chr12:14921581:14925611:CD8 Memory         |
|         |        |      |           |         |         |            |          |          |     | 7pool;chr12:14921659:14925421:CD3;chr12:149216    |
|         |        |      |           |         |         |            |          |          |     | 85:14925507:CD8 Naive                             |
|         |        |      |           |         |         |            |          |          |     | 7pool;chr12:14921718:14925476:CD4 Naive Primary   |
|         |        |      |           |         |         |            |          |          |     | 7pool;chr12:14921730:14925713:CD4 Memory          |
|         |        |      |           |         |         |            |          |          |     | Primary 8pool;chr12:14921804:14930583:Colon       |
| ASHG19  |        |      |           |         |         |            |          |          |     | chr12:1481                                        |
| SELNC2  |        |      |           | ENST00  |         |            |          |          |     | Crypt                                             |
| A100015 |        |      |           | 0006060 | noncodi | ENSG000002 | RP11-    |          |     | 8589-                                             |
| 415     | 2.3584 | down | noncoding | 57      | ng      | 72354      | 307L14.2 | Reliable | 376 | 1;chr12:14921817:14929490:Pancreas;chr12:1492201  |
|         |        |      |           |         |         |            |          |          |     | 7:14929433:HeLa                                   |

|         |        |      |           |         |         |            |          |          |     |                                                      |
|---------|--------|------|-----------|---------|---------|------------|----------|----------|-----|------------------------------------------------------|
| ASHG19  |        |      |           |         |         |            |          |          |     | chr5:64316                                           |
| SELNC2  |        |      |           | ENST00  |         |            |          |          |     | 441-                                                 |
| A100015 |        |      |           | 0006060 | noncodi | ENSG000002 | RP11-    |          |     | chr5:64308152:64339581:Osteoblasts;chr5:64317564     |
| 415     | 2.3584 | down | noncoding | 57      | ng      | 72354      | 307L14.2 | Reliable | 376 | 64316816:+ :64375123:HBL1;chr5:64323861:64372928:u87 |

ASHG19  
 SELNC2  
 A100006  
 906 2.0534 up noncoding 97 ng 61526 CTB-31O20.2 Reliable 1288

chr19:1825637:1883458:HCT-  
 116;chr19:1825803:1876878:LNCaP;chr19:1851043:  
 1898475:CD8  
 primary;chr19:1851043:1898511:CD4p CD25-  
 CD45ROp Memory;chr19:1851179:1863643:CD4  
 Memory Primary  
 7pool;chr19:1851308:1898081:CD4p CD225int  
 CD127p Tmem;chr19:1851482:1865735:Colon  
 Crypt  
 3;chr19:1851542:1865663:Toledo;chr19:1851963:18  
 76206:CD34 adult;chr19:1851994:1898577:CD8  
 Memory 7pool;chr19:1852750:1865843:Sigmoid  
 Colon;chr19:1852897:1857967:CD34  
 fetal;chr19:1853107:1866012:Spleen;chr19:1853176:  
 1865991:Esophagus;chr19:1853410:1876816:VACO  
 503;chr19:1854521:1862878:Small  
 Intestine;chr19:1854545:1885395:Brain Cingulate  
 Gyrus;chr19:1854775:1902160:CD56;chr19:1855456  
 :1863700:Colon Crypt  
 2;chr19:1855501:1877025:NHLF;chr19:1855536:186  
 3748:Colon Crypt 1;chr19:1873820:1898280:CD4  
 Naive Primary 8pool;chr19:1873834:1898194:CD8  
 chr19:1874 Naive 8pool;chr19:1873851:1898228:CD8 Naive  
 881- 7pool;chr19:1873897:1898070:CD4 Naive Primary  
 1876168:- 7pool



|         |        |      |           |         |         |            |          |          |     |  |            |                                                  |
|---------|--------|------|-----------|---------|---------|------------|----------|----------|-----|--|------------|--------------------------------------------------|
| ASHG19  |        |      |           |         |         |            |          |          |     |  | chr2:28648 | chr2:28609177:28647539:HUVEC;chr2:28609954       |
| SELNC2  |        |      |           | ENST00  |         |            |          |          |     |  | 812-       | :28647368:Osteoblasts;chr2:28611692:28630654:Adi |
| A100001 |        |      |           | 0006050 | noncodi | ENSG000002 | RP11-    |          |     |  | 569        | 28649586:+                                       |
| 569     | 2.8314 | down | noncoding | 56      | ng      | 70210      | 373D23.3 | Reliable | 775 |  |            | pose                                             |

chr2:28558547:28585519:Esopnagus;chr2:28559422:  
 28647737:Gastric;chr2:28541595:28638254:Psoas  
 Muscle;chr2:28541764:28638743:Skeletal  
 Muscle;chr2:28549794:28661600:Sigmoid  
 Colon;chr2:28550197:28654694:Spleen;chr2:285550  
 17:28580455:Right  
 Atrium;chr2:28555696:28621822:Fetal  
 Muscle;chr2:28560768:28633683:HeLa;chr2:2856141  
 0:28660512:Small  
 Intestine;chr2:28564705:28630926:Duodenum  
 Smooth  
 Muscle;chr2:28569985:28654363:CD56;chr2:285701  
 62:28654496:CD8  
 primary;chr2:28578132:28632603:Pancreatic  
 islets;chr2:28578249:28632645:Bladder;chr2:285782  
 90:28620321:Fetal  
 Intestine;chr2:28578354:28661392:Colon Crypt  
 1;chr2:28578385:28638268:Colon Crypt  
 3;chr2:28578393:28661293:Colon Crypt  
 2;chr2:28578431:28620644:Fetal Intestine  
 Large;chr2:28578930:28633785:VACO  
 503;chr2:28581266:28660518:Tonsil;chr2:28598695:  
 28677657:Esophagus;chr2:28599607:28639515:H217  
 1;chr2:28599847:28632500:HMEC;chr2:28600200:2  
 8621212:NHEK;chr2:28600287:28647472:Thymus;c  
 hr2:28600588:28649314:CD14;chr2:28601601:28648  
 611:CD4p CD25- II17- PMAstim

|                                         |        |    |           |    |    |       |            |            |         |      |
|-----------------------------------------|--------|----|-----------|----|----|-------|------------|------------|---------|------|
| ASHG19                                  |        |    |           |    |    |       |            |            |         |      |
| SELNC2                                  |        |    |           |    |    |       |            |            |         |      |
| A100002                                 |        |    |           |    |    |       |            |            |         |      |
| 491                                     | 2.0331 | up | noncoding | 19 | ng | 67577 | CATG000000 | CATG000000 | 67577.1 | 2375 |
| chr4:37824                              |        |    |           |    |    |       |            |            |         |      |
| 91-                                     |        |    |           |    |    |       |            |            |         |      |
| 3784865:+ chr4:3766999:3790224:VACO 400 |        |    |           |    |    |       |            |            |         |      |

|                                                       |        |      |           |    |    |       |            |      |           |              |
|-------------------------------------------------------|--------|------|-----------|----|----|-------|------------|------|-----------|--------------|
| ASHG19                                                |        |      |           |    |    |       |            |      |           |              |
| SELNC2                                                |        |      |           |    |    |       |            |      |           |              |
| A100018                                               |        |      |           |    |    |       |            |      |           |              |
| 469                                                   | 4.3469 | down | noncoding | 33 | ng | 68164 | ENSG000002 | CTD- | 2337J16.1 | Reliable 619 |
| chr19:5475                                            |        |      |           |    |    |       |            |      |           |              |
| 3289- chr19:54750641:54793891:Spleen;chr19:54772520:5 |        |      |           |    |    |       |            |      |           |              |
| 54753907:- 4794390:CD14                               |        |      |           |    |    |       |            |      |           |              |

|         |        |      |           |         |         |            |             |          |     |  |                                                                                                                                                                                                                                                                                                                                                                                                            |                                                   |
|---------|--------|------|-----------|---------|---------|------------|-------------|----------|-----|--|------------------------------------------------------------------------------------------------------------------------------------------------------------------------------------------------------------------------------------------------------------------------------------------------------------------------------------------------------------------------------------------------------------|---------------------------------------------------|
| ASHG19  |        |      |           |         |         |            |             |          |     |  | chr5:87942456:87992522:Brain Inferior Temporal Lobe;chr5:87946098:87991815:Brain Hippocampus Middle 150;chr5:87946127:87989956:Brain Cingulate Gyrus;chr5:87946372:87987414:Brain Anterior Caudate;chr5:87950865:87989017:NCI-H69;chr5:87951604:87989109:u87;chr5:87952149:87990686:Brain Angular Gyrus;chr5:87954387:87972999:MM1S;chr5:87954482:87973550:Toledo;chr5:87954635:87990140:Brain Hippocampus |                                                   |
| SELNC2  |        |      |           | ENST00  |         |            |             |          |     |  | chr5:87972                                                                                                                                                                                                                                                                                                                                                                                                 | Middle;chr5:87954647:87973608:Ly4;chr5:87955130   |
| A100010 |        |      |           | 0005102 | noncodi | ENSG000002 |             |          |     |  | 036-                                                                                                                                                                                                                                                                                                                                                                                                       | :87976618:Astrocytes;chr5:87955213:87989872:Brain |
| 603     | 3.4947 | down | noncoding | 74      | ng      | 45864      | CTC-467M3.1 | Reliable | 463 |  | 88018648:+                                                                                                                                                                                                                                                                                                                                                                                                 | n Mid Frontal Lobe                                |





|         |        |    |           |         |         |            |             |          |     |                                                                                                                                                                                                                                                          |
|---------|--------|----|-----------|---------|---------|------------|-------------|----------|-----|----------------------------------------------------------------------------------------------------------------------------------------------------------------------------------------------------------------------------------------------------------|
| ASHG19  |        |    |           |         |         |            |             |          |     | chr11:67768822:67784928:Toledo;chr11:67774986:67788833:HeLa;chr11:67775074:67783359:Lung;chr11:67775466:67783160:VACO                                                                                                                                    |
| SELNC2  |        |    |           | ENST00  |         |            |             |          |     | 503;chr11:67775911:67797063:HSMMtube;chr11:6777185:67797197:HSMM;chr11:67777199:67797183:Skeletal Muscle                                                                                                                                                 |
| A100009 |        |    |           | 0005322 | noncodi | ENSG000002 |             |          |     | Myoblast;chr11:67779534:67820405:Pancreatic islets;chr11:67793884:67802150:Adrenal Gland;chr11:67800871:67818895:Pancreas;chr11:67802480:67832882:CD14;chr11:67802716:67809011:Spleen;chr11:67803279:67809641:Lung;chr11:67803491:67811886:Adrenal Gland |
| 108     | 2.5432 | up | noncoding | 96      | ng      | 55306      | RP5-901A4.1 | Reliable | 739 | chr11:67792277-67797928:-                                                                                                                                                                                                                                |

|         |        |    |           |         |         |            |          |          |     |                                                                                                                                                          |
|---------|--------|----|-----------|---------|---------|------------|----------|----------|-----|----------------------------------------------------------------------------------------------------------------------------------------------------------|
| ASHG19  |        |    |           |         |         |            |          |          |     | chr2:214017694-214018383:+                                                                                                                               |
| SELNC2  |        |    |           | ENST00  |         |            |          |          |     | chr2:213953442:213995415:DND41;chr2:213963111:214031097:CD56;chr2:213965627:214031947:Tonsil;chr2:214001881:214067934:Toledo;chr2:21400920:214055227:Ly1 |
| A100013 |        |    |           | 0006048 | noncodi | ENSG000002 | RP11-    |          |     |                                                                                                                                                          |
| 128     | 3.2006 | up | noncoding | 18      | ng      | 70659      | 105N14.1 | Reliable | 690 |                                                                                                                                                          |

|         |        |      |           |         |         |            |            |  |     |                                                                                                                                                     |
|---------|--------|------|-----------|---------|---------|------------|------------|--|-----|-----------------------------------------------------------------------------------------------------------------------------------------------------|
| ASHG19  |        |      |           |         |         |            |            |  |     | chr7:22893122:22907712:Osteoblasts;chr7:22893695:22903725:NHEK;chr7:22893734:22901595:HMEC;chr7:22893787:22907736:NHLF;chr7:22893790:22907802:IMR90 |
| SELNC2  |        |      |           | ENST00  |         |            |            |  |     |                                                                                                                                                     |
| A100014 |        |      |           | 0004225 | noncodi | ENSG000002 |            |  |     |                                                                                                                                                     |
| 285     | 2.4231 | down | noncoding | 42      | ng      | 28649      | AC005682.5 |  | 929 |                                                                                                                                                     |

|         |        |      |           |         |         |            |          |          |     |                                                                                     |
|---------|--------|------|-----------|---------|---------|------------|----------|----------|-----|-------------------------------------------------------------------------------------|
| ASHG19  |        |      |           |         |         |            |          |          |     | chr12:9139771-9149162:-                                                             |
| SELNC2  |        |      |           | ENST00  |         |            |          |          |     | chr12:9137617:9202267:CD8 primary;chr12:9139711:9193378:CD4p CD25- II17- PMAstim Th |
| A100010 |        |      |           | 0005457 | noncodi | ENSG000002 | RP11-    |          |     |                                                                                     |
| 699     | 2.2386 | down | noncoding | 06      | ng      | 57105      | 259O18.4 | Reliable | 496 |                                                                                     |

|         |        |      |           |    |    |       |            |      |  |  |                                                            |
|---------|--------|------|-----------|----|----|-------|------------|------|--|--|------------------------------------------------------------|
| ASHG19  |        |      |           |    |    |       |            |      |  |  | chr10:77153661:77191888:Esophagus;chr10:7715414            |
| SELNC2  |        |      |           |    |    |       |            |      |  |  | 9:77169985:Pancreatic                                      |
| A100012 |        |      |           |    |    |       |            |      |  |  | islets;chr10:77154286:77170840:Lung;chr10:771544           |
| 114     | 2.3561 | down | noncoding | 16 | ng | 37149 | ZNF503-AS2 | 2024 |  |  | 16:77170741:Gastric;chr10:77154551:77169965:HC             |
|         |        |      |           |    |    |       |            |      |  |  | T-                                                         |
|         |        |      |           |    |    |       |            |      |  |  | 116;chr10:77154662:77170075:Spleen;chr10:771547            |
|         |        |      |           |    |    |       |            |      |  |  | 14:77169953:Adrenal                                        |
|         |        |      |           |    |    |       |            |      |  |  | Gland;chr10:77154737:77169907:Pancreas;chr10:771           |
|         |        |      |           |    |    |       |            |      |  |  | 54799:77169888:Small                                       |
|         |        |      |           |    |    |       |            |      |  |  | Intestine;chr10:77154862:77170741:Aorta;chr10:771          |
|         |        |      |           |    |    |       |            |      |  |  | 55248:77170749:Right                                       |
|         |        |      |           |    |    |       |            |      |  |  | chr10:7716 Atrium;chr10:77156974:77169864:Ovary;chr10:7715 |
|         |        |      |           |    |    |       |            |      |  |  | 2812- 9193:77192371:u87;chr10:77159256:77169784:VAC        |
|         |        |      |           |    |    |       |            |      |  |  | 77168738:+ O 400;chr10:77159866:77169894:VACO 9m           |



ASHG19  
SELNC2  
A100389  
849

17.406 up

noncoding

MICT00  
0002605

noncodi  
ng

56

67637

CATG000000

67637.1

CATG000000

2439

chr4:67652  
35-  
6776239:+

chr4:6747543:6755479:Sigmoid  
Colon;chr4:6747688:6775877:Colon Crypt  
1;chr4:6747805:6754014:LNCaP;chr4:6747980:6755  
423:Colon Crypt  
2;chr4:6748436:6775971:Esophagus;chr4:6769138:6  
790306:Spleen;chr4:6769697:6896339:CD14;chr4:68  
93090:6913819:HepG2;chr4:6893265:6972483:Sigm  
oid Colon;chr4:6893286:6950427:Small  
Intestine;chr4:6904027:6966281:Gastric;chr4:690995  
1:6995625:Fetal Intestine  
Large;chr4:6909995:6959132:Lung;chr4:6910012:69  
66350:Adrenal  
Gland;chr4:6910151:6920583:K562;chr4:6911789:69  
50465:Duodenum Smooth  
Muscle;chr4:6916638:6995431:Fetal  
Intestine;chr4:6916719:6972539:Colon Crypt  
1;chr4:6916746:6972431:Colon Crypt  
2;chr4:6917822:6945824:Spleen;chr4:6918165:69458  
33:Thymus;chr4:6985595:7004711:Esophagus;chr4:6  
992335:7008299:HMEC

|         |        |      |           |         |         |            |            |      |      |            |                                                       |
|---------|--------|------|-----------|---------|---------|------------|------------|------|------|------------|-------------------------------------------------------|
| ASHG19  |        |      |           |         |         |            |            |      |      |            | chr2:12130                                            |
| SELNC2  |        |      |           | ENST00  |         |            |            |      |      |            | 0485-                                                 |
| A100009 |        |      |           | 0004139 | noncodi | ENSG000002 |            |      |      |            | 121301902:                                            |
| 767     | 7.0038 | up   | noncoding | 91      | ng      | 37614      | AC073257.2 | Gold | 528  | -          | chr2:121284833:121325534:HSMMtube                     |
| ASHG19  |        |      |           |         |         |            |            |      |      |            |                                                       |
| SELNC2  |        |      |           | ENST00  |         |            |            |      |      |            | chr16:2238                                            |
| A100339 |        |      |           | 0005688 | noncodi | ENSG000002 | RP11-      |      |      |            | 6180- chr16:22363239:22393624:Tonsil;chr16:22379688:2 |
| 723     | 2.0004 | down | noncoding | 27      | ng      | 60790      | 21M24.2    |      | 1415 | 22387594:+ | 2387317:HepG2                                         |

|         |        |    |           |         |            |       |         |            |                                                   |
|---------|--------|----|-----------|---------|------------|-------|---------|------------|---------------------------------------------------|
| ASHG19  |        |    |           |         |            |       |         |            |                                                   |
| SELNC2  |        |    | ENST00    |         |            |       |         | chr7:66800 |                                                   |
| A100011 |        |    | 0004302   | noncodi | ENSG000002 | RP11- |         | 963-       |                                                   |
| 317     | 2.8304 | up | noncoding | 44      | ng         | 35475 | 166O4.5 | 489        | 66805011:+ chr7:66790827:66810091:Skeletal Muscle |

|         |        |      |           |         |         |            |          |     |   |  |                                                            |
|---------|--------|------|-----------|---------|---------|------------|----------|-----|---|--|------------------------------------------------------------|
| ASHG19  |        |      |           |         |         |            |          |     |   |  | chr12:114798893:114890765:Right                            |
| SELNC2  |        |      |           | ENST00  |         |            |          |     |   |  | chr12:1148                                                 |
| A100520 |        |      |           | 0005326 | noncodi | ENSG000002 |          |     |   |  | 46001-                                                     |
| 580     | 2.2248 | down | noncoding | 97      | ng      | 55399      | TBX5-AS1 | 961 | + |  | 818897:114854353:Left                                      |
|         |        |      |           |         |         |            |          |     |   |  | 114847419: Ventricle;chr12:114833059:114852784:NHLF;chr12: |
|         |        |      |           |         |         |            |          |     |   |  | 114833160:114869133:IMR90                                  |



|         |        |      |           |         |         |            |            |              |            |                                                                                                                                                                                                                                                                                                                                                                                                                                                                                                                                                                              |
|---------|--------|------|-----------|---------|---------|------------|------------|--------------|------------|------------------------------------------------------------------------------------------------------------------------------------------------------------------------------------------------------------------------------------------------------------------------------------------------------------------------------------------------------------------------------------------------------------------------------------------------------------------------------------------------------------------------------------------------------------------------------|
| ASHG19  |        |      |           |         |         |            |            |              |            | chr4:10150980:10186965:RPMI-8402;chr4:10162614:10215242:CD4 Memory Primary                                                                                                                                                                                                                                                                                                                                                                                                                                                                                                   |
| SELNC2  |        |      |           | MICT00  |         |            |            |              |            | 7pool;chr4:10166089:10191275:u87;chr4:10169349:10206849:K562;chr4:10172655:10189291:CD8                                                                                                                                                                                                                                                                                                                                                                                                                                                                                      |
| A100009 |        |      |           | 0002611 | noncodi | CATG000000 | CATG000000 |              | chr4:10171 | Memory 7pool;chr4:10172793:10188615:CD34                                                                                                                                                                                                                                                                                                                                                                                                                                                                                                                                     |
| 330     | 4.4023 | down | noncoding | 93      | ng      | 67721      | 67721.1    | 1019         | 656-       | Primary RO01536;chr4:10175487:10184651:CD34 adult                                                                                                                                                                                                                                                                                                                                                                                                                                                                                                                            |
|         |        |      |           |         |         |            |            |              |            | chr11:120039045:120098496:Brain Hippocampus Middle;chr11:120039076:120098002:Brain Inferior Temporal Lobe;chr11:120039099:120097456:Brain Cingulate Gyrus;chr11:120039192:120097878:Brain Anterior Caudate;chr11:120048839:120096728:Fetal Muscle;chr11:120052177:120096634:Fetal Intestine Large;chr11:120052269:120096765:Fetal Intestine;chr11:120052336:120096938:Sigmoid Colon;chr11:120052757:120096965:Small Intestine;chr11:120053289:120089525:HepG2;chr11:120053442:120092967:Colon Crypt 1;chr11:120053527:120093038:Colon Crypt 2;chr11:120053731:120068943:VACO |
| ASHG19  |        |      |           |         |         |            |            |              | chr11:1200 | 2;chr11:120078202:120099019:Spleen;chr11:1200                                                                                                                                                                                                                                                                                                                                                                                                                                                                                                                                |
| SELNC2  |        |      |           | ENCT00  |         |            |            |              | 75373-     | 78247:120097906:Adrenal                                                                                                                                                                                                                                                                                                                                                                                                                                                                                                                                                      |
| A100007 |        |      |           | 0000839 | noncodi | CATG000000 | CATG000000 |              | 120076446: | Gland;chr11:120094297:120131709:Ly4                                                                                                                                                                                                                                                                                                                                                                                                                                                                                                                                          |
| 756     | 3.6861 | down | noncoding | 92      | ng      | 07199      | 07199.1    | 1074         | -          |                                                                                                                                                                                                                                                                                                                                                                                                                                                                                                                                                                              |
| ASHG19  |        |      |           |         |         |            |            |              | chr19:5891 |                                                                                                                                                                                                                                                                                                                                                                                                                                                                                                                                                                              |
| SELNC2  |        |      |           | ENST00  |         |            |            |              | 1588-      | chr19:58896320:58918674:LNCaP;chr19:58896614:5                                                                                                                                                                                                                                                                                                                                                                                                                                                                                                                               |
| A100000 |        |      |           | 0005963 | noncodi | ENSG000002 | CTD-       |              | 58912046:+ | 8913811:VACO 503                                                                                                                                                                                                                                                                                                                                                                                                                                                                                                                                                             |
| 758     | 5.053  | up   | noncoding | 79      | ng      | 68307      | 2619J13.13 | Reliable 459 |            |                                                                                                                                                                                                                                                                                                                                                                                                                                                                                                                                                                              |

ASHG19  
 SELNC2 ENCT00  
 A100004 0004308 noncodi CATG000001 CATG000001  
 107 2.0996 up noncoding 92 ng 01226 01226.1 1704

chr8:142082657:142171039:Colon Crypt  
 3;chr8:142083234:142142130:Tonsil;chr8:14209354  
 7:142137168:Ly4;chr8:142094319:142137181:Ly1;c  
 hr8:142095959:142155874:CD20;chr8:142096012:14  
 2175600:Spleen;chr8:142096174:142132036:CD19  
 Primary;chr8:142120798:142140753:Left  
 Ventricle;chr8:142120902:142193195:Lung;chr8:142  
 124717:142141984:HeLa;chr8:142125160:14217550  
 2:Sigmoid Colon;chr8:142125197:142171242:Colon  
 Crypt 1;chr8:142125218:142168720:Colon Crypt  
 2;chr8:142125252:142175373:Gastric;chr8:14212608  
 1:142175538:Small  
 Intestine;chr8:142126519:142143523:HUVVEC;chr8:1  
 42128389:142176025:CD14;chr8:142136636:142142  
 373:NHLF;chr8:142155859:142175599:NHLF;chr8:1  
 42157160:142175949:HUVVEC;chr8:142189257:1423  
 29653:Pancreatic  
 islets;chr8:142203996:142256112:Colon Crypt  
 3;chr8:142204096:142218264:Colon Crypt  
 2;chr8:142235785:142323125:Left  
 Ventricle;chr8:142236313:142322683:Lung;chr8:142  
 247913:142257048:CD3;chr8:142273782:142329307  
 :Gastric;chr8:142274002:142298319:Colon Crypt  
 1;chr8:142274063:142298247:Colon Crypt  
 6897- 3;chr8:142274170:142298019:Colon Crypt  
 142108600: 2;chr8:142275078:142322809:Right  
 + Atrium;chr8:142276139:142319373:Pancreas
